# Supplementary material for: Widely applicable (radio)dihalogenation of alkynes and alkenes using two different nucleophilic alkali metal halides
Source: Royal Society of Chemistry journal article supplement (doi:10.1039/d2qo01276f), 2022-01-01
Supplement: d2qo01276f1.pdf [file d2qo01276f1.pdf]

# Supporting information

## Widely Applicable (Radio)dihalogenation of Alkynes and Alkenes using Two

### Different Nucleophilic Alkali Metal Halides

Shiwen Liu,<sup>‡a, b</sup> Yueying Zhang,<sup>‡a</sup> Kehao Gong,<sup>a</sup> Xiaojun Zeng,<sup>\*c</sup> Fang Xie,<sup>\*d</sup> Bo Xu,<sup>\*e</sup> Junbin Han<sup>\*a</sup>

<sup>a</sup> Institute of Radiation Medicine, Fudan University, Shanghai, 200032, China

<sup>b</sup> College of Textiles and Clothing, Yancheng Institute of Technology, Yancheng, 224051, China

<sup>c</sup> College of Chemistry, Nanchang University, Nanchang, 330031, China

<sup>d</sup> PET Center, Huashan Hospital, Fudan University, Shanghai, 200040, China

<sup>e</sup> Key Laboratory of Science and Technology of Eco-Textiles, Ministry of Education, College of Chemistry, Chemical Engineering and Biotechnology, Donghua University, Shanghai, 201620, China

## Table of Contents

|                                                                                      |     |
|--------------------------------------------------------------------------------------|-----|
| 1. General.....                                                                      | 2   |
| 2. Experimental Procedure and Characterization Data.....                             | 2   |
| 3. Radio-synthesis of <sup>125</sup> I-labeled alkenyl iodide .....                  | 5   |
| 4. Characterization data .....                                                       | 8   |
| 5. Radio-HPLC analysis and characterization for <sup>125</sup> I-labeled alkene..... | 25  |
| 6. Copies of NMR Spectra.....                                                        | 36  |
| 7. X-ray crystallographic data of 3q .....                                           | 134 |
| 8. Calculated geometries of intermediates .....                                      | 142 |
| 9. References.....                                                                   | 149 |

# 1. General

## 1.1 Chemistry-General procedures and materials information

Commercial reagents and solvents were obtained from the commercial providers and used without further purification. The products were purified using a commercial flash chromatography system or a regular glass column. TLC was developed on silica gel 60 F254 glass plates.  $^1\text{H}$  NMR (400 MHz) and  $^{13}\text{C}$  NMR (100 MHz) spectra were recorded on a Bruker NMR apparatus. Or alternatively,  $^1\text{H}$  NMR chemical shifts were referenced to tetramethylsilane signal (0 ppm). The chemical shifts are reported in  $\delta$  (ppm) values ( $^1\text{H}$  and  $^{13}\text{C}$  NMR relative to  $\text{CHCl}_3$ ,  $\delta$  7.26 ppm for  $^1\text{H}$  NMR, and  $\delta$  77.0 ppm for  $^{13}\text{C}$  NMR). Multiplicities are recorded by s (singlet), d (doublet), dd (doublet of doublets), dtd (doublet of triplet of doublets), t (triplet), td (triplet of doublets), m (multiplet) and br (broad), q (quartet). Coupling constants (J), are reported in Hertz (Hz). GC analyses were performed using a Shimadzu GC-2010-ultra gas chromatography-mass spectrometry instrument equipped with a Shimadzu AOC-20s autosampler.

## 2. Experimental Procedure and Characterization Data

### 2.1 Preparation of compound 1

All alkynes and alkenes were purchased from commercial providers unless otherwise noted below.

#### Procedure for the synthesis of compound 1ab, 1ac

Compound **1ab** and **1ac** were prepared according to the referenced literature.<sup>1</sup> To a suspension of aryl iodides (4.02 mmol),  $\text{Pd}(\text{PPh}_3)_2\text{Cl}_2$  (0.120 mmol, 84.3 mg),  $\text{CuI}$  (0.240 mmol, 45.7 mg) and  $\text{Et}_3\text{N}$  (2.24 mL, 16.1 mmol) in DMF (6.8 mL) was added terminal alkynes (4.06 mmol). After stirring at 50 °C for 12 h, the reaction mixture was diluted with  $\text{AcOEt}$  and  $\text{H}_2\text{O}$ . The organic layer was washed with  $\text{H}_2\text{O}$  three times, washed with brine, dried over  $\text{Na}_2\text{SO}_4$ , filtered, and concentrated under reduced pressure. The residue was purified by flash column chromatography on silica gel (eluant: petroleum ether/ethyl acetate).

#### Procedure for the synthesis of the compound 1ag

Compound **1ag** was prepared according to the referenced literature,<sup>2</sup> and the compounds' spectra data are in agreement with the reports.

#### Procedure for the synthesis of compound 1ah, 1ai, 1aj

Compounds **1ah**, **1ai**, **1aj** were prepared according to the referenced literature.<sup>3</sup> To a solution of alcohol (10 mmol) and acid (12 mmol) in DCM (20 mL) at 0 °C, DCC (15 mmol, 15 mL of a 1 M solution in DCM) and DMAP (5 mmol, 611 mg) was added successively. The mixture was warmed to rt and stirred for 20 h. The suspension was filtered, and the solid was washed with DCM. The combined filtrate was evaporated, and the residue was purified by column chromatography on silica gel.

#### Procedure for the synthesis of **1bi**

Compound **1bi** was prepared according to the referenced literature,<sup>4</sup> and the compounds' spectra data agree with the reports.

#### Procedure for the synthesis of **1bj**

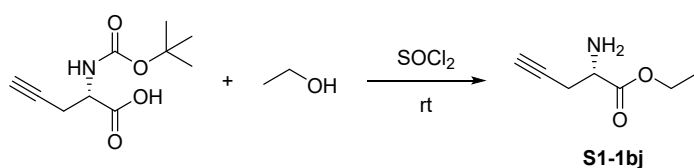

To an oven-dried 100 mL flask, thionyl chloride (2.23 g, 19 mmol) was added dropwise to a solution of *N*-Boc-L-propargylglycine (1.0 g, 2.35 mmol) in ethanol (45 mL), and the mixture was stirred at room temperature for 14 hours. The reaction mixture was evaporated in vacuo, and the residue was dissolved in dichloromethane and washed with 1 M NaHCO<sub>3</sub> solution and brine. The organic layer was dried over MgSO<sub>4</sub>, filtered, and concentrated under reduced pressure. The residue was purified by flash column chromatography on silica gel to afford the intermediate compound **S1-1bj** (628 mg, 95%) as a yellow oil.

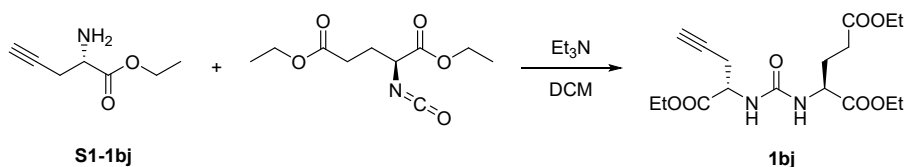

To a solution of **S1-1bj** compound in DCM (25 mL) were added diethyl (*S*)-2-isocyanatopentanedioate (1.03 mg, 4.48 mmol) and Triethylamine (3.68 mL) at room temperature. The reaction mixture was stirred at room temperature for 24 hours. Then the mixture was poured into a saturated aqueous solution of NH<sub>4</sub>Cl (150 mL) and extracted by dichloromethane (150 mL). The organic layer was washed with brine, dried with MgSO<sub>4</sub>, then concentrated under reduced pressure. The crude product was purified by chromatography on silica gel to afford compound **1bj** as a white solid (1.29 g, 78%).

### Procedure for the synthesis of **1bl**

Compound **1bl** was prepared with two procedures according to the referenced literature,<sup>5</sup> and the compounds' spectra data are in agreement with the reports.

### Procedure for the synthesis of **1bm**

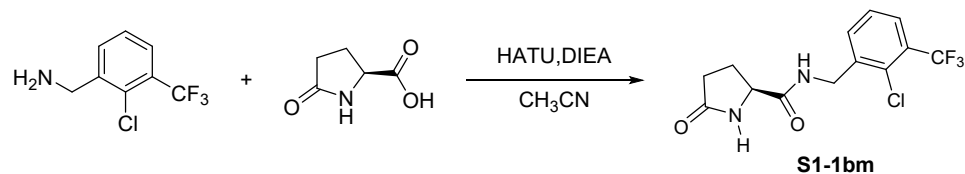

To an oven-dried 500 mL flask, 2-Chloro-3-(Trifluoromethyl) Benzylamine (1.68 g, 8.0 mmol), 2-Pyrrolidone-5-carboxylic acid (1.03 g, 8.0 mmol), DIEA (1.92 g, 10.0 mmol), HATU (3.80 g, 10.0 mmol) and CH<sub>3</sub>CN (150 mL) were added sequentially and stirred at rt overnight. The reaction mixture was washed with HCl and NaHCO<sub>3</sub> solution. The organic layer was dried over MgSO<sub>4</sub>, filtered, and concentrated under reduced pressure. The residue was purified by flash column chromatography on silica gel to afford the intermediate compound **S1-1bm** (1.5 g, 60%) as a white solid<sup>6</sup>.

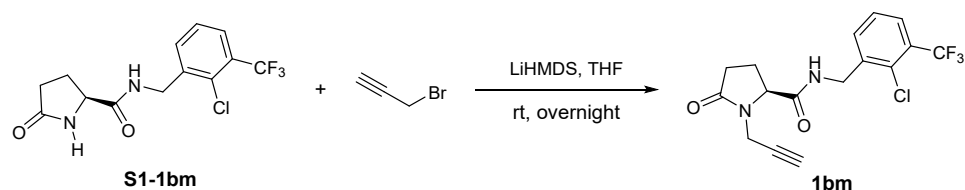

To a solution of the **S1-1bm** in THF (15 mL) were added LiHMDS (4.5 mL), 3-Bromopropyne (714 mg, 6 mmol) at 0 °C. The reaction mixture was gradually warmed to room temperature and was stirred overnight. The aqueous solution was extracted with EtOAc (3×25 mL), the organic layer washed with saturated NaCl solution (3×30 mL), dried with MgSO<sub>4</sub>, and evaporated. The crude product was purified by chromatography on silica gel to afford compound **1bm** as a white solid (210 mg, 20%).

## 2.2 Preparation of iodochlorination of alkynes **3** or **4**

Lithium iodide (0.24 mmol, 1.2 equiv), lithium chloride (0.24 mmol, 1.2 equiv) and alkynes (0.2 mmol) were added to a dried reaction vial equipped with a magnetic stir bar. Acetic acid (0.5 mL), DCM (0.25 mL) with or without HFIP (0.25 mL) were added, and the mixture was cooled to 0 °C. Then *m*CPBA (0.24 mmol, 85%, 1.2 equiv) was added into the mixture and stirred for 2 h under air at 0 °C. After the reaction was completed, the

saturated sodium thiosulfate solution was added into the mixture to quench the reaction (remove excess oxidants). The reaction mixture was extracted with DCM (15 mL×2). The combined organic layers were washed with brine, dried over Na<sub>2</sub>SO<sub>4</sub>, and then the excess solvent was removed under reduced pressure, the crude product was further purified by silica gel column chromatography to provide the corresponding product.

### 2.3 Preparation of iodobromination of alkenes 5

Lithium iodide (0.24 mmol, 32 mg, 1.2 equiv), lithium chloride (0.24 mmol, 10 mg, 1.2 equiv) were added to a dried reaction vial equipped with a magnetic stir bar. Acetic acid (0.5 mL), DCM (0.25 mL) were added, and the mixture was cooled to 0 °C. Then *m*CPBA (0.24 mmol, 48 mg, 85%, 1.2 equiv) was added to the mixture. After 10 min, 4-fluorostyrene (0.2 mmol, 24 mg) was introduced and stirred for 2 h under air at 0 °C. After the reaction was completed, the saturated sodium thiosulfate solution was added to the mixture to quench the reaction (remove excess oxidants). The reaction mixture was extracted with DCM (15 mL×2). The combined organic layers were washed with brine, dried over Na<sub>2</sub>SO<sub>4</sub>, and then the excess solvent was removed under reduced pressure; the residue was purified by silica gel column chromatography to provide the final products **5a**.

## 3. Radio-synthesis of <sup>125</sup>I-labeled alkenyl iodide

### 3.1 General

Sodium [<sup>125</sup>I] iodide was purchased from HTA Co., Ltd. as none carrier added [<sup>125</sup>I]sodium iodide in 1 × 10<sup>-5</sup> M NaOH. The crude radiolabelled product purification was performed by HPLC on UltiMate 3000 system (Thermo Fisher Scientific, USA) equipped with a Bioscan Flow-Count radio-HPLC detector under the following conditions: Agilent Eclipse XDB-C18, 5 μm, 4.6 × 250 mm, 75% acetonitrile in ammonium formate buffer (0.1 M, pH = 4.5) as mobile phase, the flow rate at 1.0 mL/min, UV wavelength at 254 and 220 nm. Glass backed thin layer chromatography (TLC) plates purchased from Merck coated with silica gel 60 F<sub>254</sub> were used for radio-TLC analysis. Radio-TLC analyses were carried out on a Bioscan Mini-Scan TLC Scanner (Eckert & Ziegler). The data were recorded and processed by Chromatography Data System (Thermo Fisher Scientific, USA) for determination of radiochemical conversion. The activities of [<sup>125</sup>I] radiolabeled samples were determined using a radioisotope dose calibrator CRC-55tR (Capintec Inc.).

### 3.2 Radioiodination condition screen

**Table S1.** Optimization of Radioiodination condition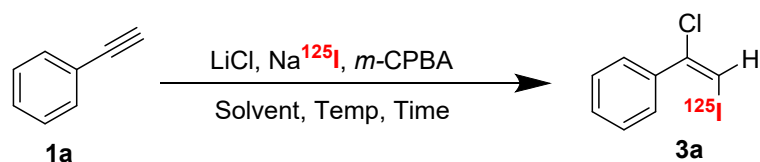

| Entry | mCPBA/ $\mu\text{mol}$ | DCM/ $\mu\text{L}$ | AcOH/ $\mu\text{L}$ | HFIP/ $\mu\text{L}$ | Temp/ $^{\circ}\text{C}$ | Time/min | RCY/% |
|-------|------------------------|--------------------|---------------------|---------------------|--------------------------|----------|-------|
| 1     | 12                     | 50                 | 150                 | 0                   | 60                       | 30       | 9     |
| 2     | 12                     | 50                 | 150                 | 0                   | 60                       | 120      | 18    |
| 3     | 12                     | 50                 | 150                 | 0                   | 60                       | 300      | 23    |
| 4     | 12                     | 50                 | 150                 | 0                   | 80                       | 30       | 83    |
| 5     | 12                     | 50                 | 150                 | 0                   | 80                       | 40       | 79    |
| 6     | 12                     | 50                 | 150                 | 0                   | 80                       | 120      | 77    |
| 7     | 6                      | 50                 | 150                 | 0                   | 80                       | 30       | 63    |
| 8     | 24                     | 50                 | 150                 | 0                   | 80                       | 30       | 71    |
| 9     | 12                     | 50                 | 100                 | 50                  | 80                       | 30       | 54    |
| 10    | 12                     | 100                | 50                  | 50                  | 80                       | 30       | 11    |

### 3.3 General procedure for the radio-iodization

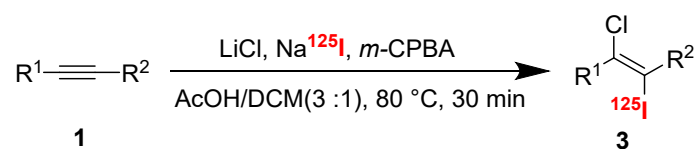

Alkynes **1** (25  $\mu\text{mol}$ ) and lithium chloride (2 mg) were added to a 1.5 mL microcentrifuge tube, followed by the addition of acetic acid (100  $\mu\text{L}$ ), DCM (50  $\mu\text{L}$ ), and 3 - 9 MBq of  $\text{Na}^{125}\text{I}$  in 2-5  $\mu\text{L}$  aqueous solution. Finally, 12  $\mu\text{mol}$  *m*-CPBA in 50  $\mu\text{L}$  acetic acid was added to the mixture, and the reaction was kept at 80  $^{\circ}\text{C}$  for 30 min. The reaction was quenched by the addition of 10 mol% sodium thiosulfate (50  $\mu\text{L}$ ) and MeCN (50  $\mu\text{L}$ ). About 100  $\mu\text{L}$  reaction mixture was analyzed by radio-HPLC to confirm the identity of the radiolabeled compound. The reaction mixture was eluted with acetonitrile and ammonium formate buffer (0.1 M, pH = 4.5), and the flow rate was 1.0 mL/min. Notably, UV and radioactivity detectors were connected in series, giving a time delay of about 0.5-1.0 min.  $^{125}\text{I}$ -labeled compounds were identified by co-injection of the unlabeled reference compounds.

### 3.4 Determinations of HPLC radiochemical yield (RCY)

About 100  $\mu\text{L}$  reaction mixture (typically containing 1.0-3.0 MBq) was injected into radio-HPLC for analysis. The activity injected into HPLC was measured (this activity was denoted by A), and the time of injection was recorded. The fraction was collected by automatic fraction collector. The activity corresponding to the radiolabeled product was measured (this activity was denoted by B). The decay-corrected RCY was calculated by dividing the decay-corrected B by A. The activities of [ $^{125}\text{I}$ ] radiolabeled samples were determined using a radioisotope dose calibrator CRC-55tR (Capintec Inc.).

### 3.5 Specific activity calculation

The specific activities (GBq/mg) were calculated by dividing the radioactivity of the  $^{125}\text{I}$ -labeled product by the amount of the unlabeled tracer determined from the peak area in UV-HPLC chromatograms ( $\lambda = 254 \text{ nm}$ ). The amounts of unlabeled compounds were determined from the UV absorbance/concentration calibration curve. The solution of  $^{125}\text{I}$ -labeled product obtained after HPLC purification was concentrated through C-18 light SepPak, and then eluted by EtOH

The resulting solutions were completely injected into the HPLC system. The peak area was determined, and the amount of carrier was calculated according to the calibration curve. For 0.42 MBq of purified compound **3a**, UV absorbance (at 220 nm) of 21.19 was measured, corresponding to 0.57  $\mu\text{g}$  for a specific activity of 7.53  $\text{GBq}\cdot\text{mg}^{-1}$  at time of injection (TOI).

**Figure S1.** Calibration curve for radio-iodization of (E)-(1-chloro-2-iodovinyl)benzene (**3a**).

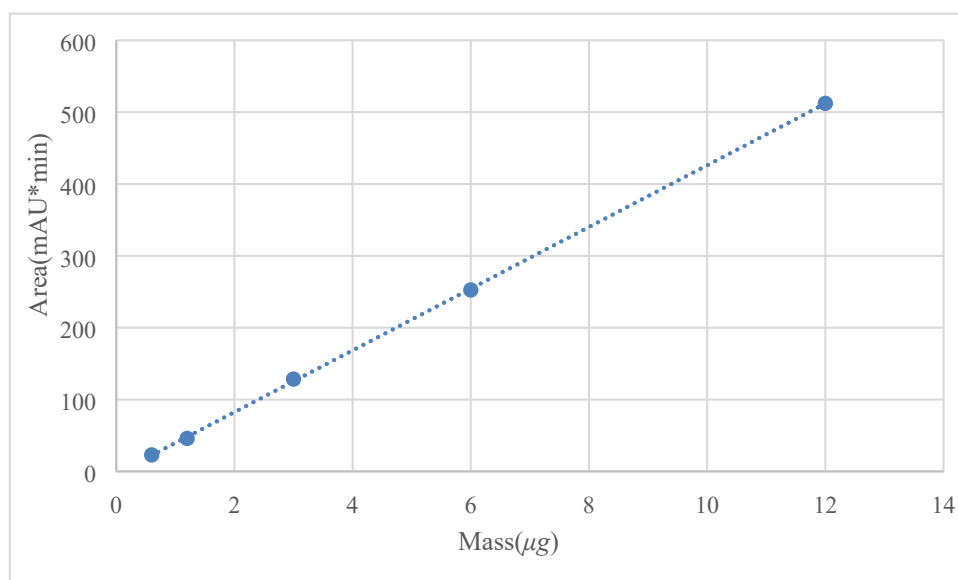

## 4. Characterization data

**diethyl (((S)-1-ethoxy-1-oxopent-4-yn-2-yl)carbamoyl)-L-glutamate(1bj).** Purified by column chromatography on silica gel (eluant: petroleum ether = 8:1). White solid (1.29 g, 78%) <sup>1</sup>H NMR (400 MHz, CDCl<sub>3</sub>) δ 5.75 (s, 1H), 4.40 (dd, J = 8.0, 4.9 Hz, 1H), 4.24 – 4.05 (m, 7H), 2.87 – 2.71 (m, 2H), 2.52 – 2.32 (m, 2H), 2.22 (dddd, J = 13.4, 8.4, 6.9, 4.9 Hz, 1H), 1.97 (dtd, J = 14.4, 8.3, 6.3 Hz, 1H), 1.30 – 1.22 (m, 9H). <sup>13</sup>C NMR (101 MHz, CDCl<sub>3</sub>) δ 172.9, 172.3, 171.7, 150.1, 149.6, 61.5, 61.3, 60.6, 57.8, 54.1, 53.4, 30.2, 29.6, 28.6, 27.5, 14.2 (d, J = 7.5 Hz). HRMS (ESI-ORBITRAP) Calculated for C<sub>17</sub>H<sub>26</sub>N<sub>2</sub>O<sub>7</sub> (M+H)<sup>+</sup> 371.1813, found 371.1819.

**(S)-N-(2-chloro-3-(trifluoromethyl)benzyl)-5-oxo-1-(prop-2-yn-1-yl)pyrrolidine-2-carboxamide (1bm).** Purified by column chromatography on silica gel (eluant: petroleum ether = 8:1). White solid (210 mg, 20%). <sup>1</sup>H NMR (400 MHz, CDCl<sub>3</sub>) δ 7.67 (dd, J = 7.9, 1.6 Hz, 1H), 7.62 (dd, J = 7.7, 1.6 Hz, 1H), 7.37 (t, J = 7.8 Hz, 1H), 6.56 (d, J = 6.2 Hz, 1H), 4.70 – 4.56 (m, 2H), 4.47 (dd, J = 17.7, 2.6 Hz, 1H), 4.33 – 4.21 (m, 1H), 3.69 (dd, J = 17.7, 2.5 Hz, 1H), 2.60 – 2.44 (m, 1H), 2.44 – 2.30 (m, 2H), 2.18 (t, J = 2.6 Hz, 1H), 2.14 – 2.00 (m, 1H). <sup>13</sup>C NMR (151 MHz, CDCl<sub>3</sub>) δ 175.2, 171.0, 137.5, 133.8, 131.7, 129.1, 127.2, 127.2, 127.2, 127.0, 121.8, 73.3, 60.5, 41.7, 31.5, 29.5, 23.4. HRMS (ESI-ORBITRAP) Calculated for C<sub>16</sub>H<sub>14</sub>ClF<sub>3</sub>N<sub>2</sub>O<sub>2</sub> (M+H)<sup>+</sup> 359.0769, found 359.0770.

**(E)-(1-chloro-2-iodovinyl)benzene (3a).** Purified by column chromatography on silica gel (eluant: petroleum ether = 15:1). Colorless oil (52 mg, 99%).<sup>7</sup> <sup>1</sup>H NMR (400 MHz, CDCl<sub>3</sub>) δ 7.57 – 7.47 (m, 2H), 7.42 – 7.36 (m, 3H), 6.77 (s, 1H). <sup>13</sup>C NMR (151 MHz, CDCl<sub>3</sub>) δ 137.6, 134.1, 129.5, 129.0, 128.3, 73.0.

**(E)-1-bromo-2-(1-chloro-2-iodovinyl)benzene (3b).** Purified by column chromatography on silica gel (eluant: petroleum ether = 15:1). Colorless oil (62 mg, 91%). <sup>1</sup>H NMR (400 MHz, CDCl<sub>3</sub>) δ 7.68 (d, J = 8.1 Hz, 1H), 7.44 – 7.38 (m, 1H), 7.32 – 7.27 (m, 2H), 6.89 (s, 1H). <sup>13</sup>C NMR (101 MHz, CDCl<sub>3</sub>) δ 139.5, 133.6, 133.2, 130.8, 130.5, 127.7, 122.0, 78.3. HRMS (EI-TOF) Calculated for C<sub>8</sub>H<sub>5</sub>BrClI (M<sup>+</sup>) 341.8308, found 341.8301.

**(E)-1-(1-chloro-2-iodovinyl)-2-ethylbenzene (3c).** Purified by column chromatography on silica gel (eluant: petroleum ether = 15:1). Colorless oil (50 mg, 87%). <sup>1</sup>H NMR (400 MHz, CDCl<sub>3</sub>) δ 7.43 – 7.37 (m, 1H), 7.36 – 7.32 (m, 1H), 7.31 – 7.26 (m, 1H), 7.21 (dd, J = 7.6, 1.0 Hz, 1H), 6.84 (s, 1H), 2.73 (q, J = 7.6 Hz, 2H), 1.31



(t,  $J = 7.6$  Hz, 3H).  $^{13}\text{C}$  NMR (101 MHz,  $\text{CDCl}_3$ )  $\delta$  141.7, 137.7, 134.6, 129.7, 129.0, 128.7, 126.1, 76.8, 25.8, 14.8. HRMS (EI-TOF) Calculated for  $\text{C}_{10}\text{H}_{10}\text{ClI}$  ( $\text{M}^+$ ) 291.9516, found 291.9510.

**(E)-1-(1-chloro-2-iodovinyl)-2-isopropylbenzene (3d).** Purified by column chromatography on silica gel (eluant: petroleum ether = 9:1). Colorless oil (56 mg, 93%).  $^1\text{H}$  NMR (400 MHz,  $\text{CDCl}_3$ )  $\delta$  7.45 – 7.40 (m, 2H), 7.30 – 7.26 (m, 1H), 7.22 – 7.17 (m, 1H), 6.85 (s, 1H), 3.19 – 3.12 (m, 1H), 1.34 – 1.30 (m, 6H).  $^{13}\text{C}$  NMR (101 MHz,  $\text{CDCl}_3$ )  $\delta$  146.5, 137.2, 134.7, 129.9, 128.9, 126.1, 126.0, 76.9, 30.4, 24.2, 23.8. HRMS (EI-TOF) Calculated for  $\text{C}_{11}\text{H}_{12}\text{ClI}$  ( $\text{M}^+$ ) 305.9672, found 305.9678.

**(E)-3-(1-chloro-2-iodovinyl)benzotrile (3e).** Purified by column chromatography on silica gel (eluant: petroleum ether/ethyl acetate = 20:1). Colorless oil (46 mg, 81%).  $^1\text{H}$  NMR (400 MHz,  $\text{CDCl}_3$ )  $\delta$  7.82 (s, 1H), 7.76 (d,  $J = 7.9$  Hz, 1H), 7.68 (d,  $J = 7.8$  Hz, 1H), 7.54 (t,  $J = 7.8$  Hz, 1H), 6.90 (s, 1H).  $^{13}\text{C}$  NMR (101 MHz,  $\text{CDCl}_3$ )  $\delta$  139.0, 133.3, 132.9, 132.7, 131.6, 129.3, 118.0, 112.8, 75.4. HRMS (EI-TOF) Calculated for  $\text{C}_9\text{H}_5\text{ClIN}$  ( $\text{M}^+$ ) 288.9155, found 288.9151.

**(E)-1-(1-chloro-2-iodovinyl)-3-nitrobenzene (3f).** Purified by column chromatography on silica gel (eluant: petroleum ether/ethyl acetate = 15:1). Yellow oil (48 mg, 79%).  $^1\text{H}$  NMR (400 MHz,  $\text{CDCl}_3$ )  $\delta$  8.39 – 8.38 (m, 1H), 8.28 – 8.21 (m, 1H), 7.84 (d,  $J = 7.7$  Hz, 1H), 7.59 (t,  $J = 8.0$  Hz, 1H), 6.93 (s, 1H).  $^{13}\text{C}$  NMR (101 MHz,  $\text{CDCl}_3$ )  $\delta$  148.0, 139.2, 135.0, 131.4, 129.5, 124.3, 124.2, 75.7. HRMS (EI-TOF) Calculated for  $\text{C}_8\text{H}_5\text{ClINO}_2$  ( $\text{M}^+$ ) 308.9053, found 308.9048.

**(E)-1-(1-chloro-2-iodovinyl)-3-fluorobenzene (3g).** Purified by column chromatography on silica gel (eluant: petroleum ether = 10:1). Colorless oil (50 mg, 90%).  $^1\text{H}$  NMR (400 MHz,  $\text{CDCl}_3$ )  $\delta$  7.42 – 7.40 (m, 1H), 7.33 (d,  $J = 7.8$  Hz, 1H), 7.27 – 7.22 (m, 1H), 7.14 – 7.07 (m, 1H), 6.83 (s, 1H).  $^{19}\text{F}$  NMR (377 MHz,  $\text{CDCl}_3$ )  $\delta$  -112.11 – -112.19 (m).  $^{13}\text{C}$  NMR (101 MHz,  $\text{CDCl}_3$ )  $\delta$  162.2 (d,  $J = 246$  Hz), 139.5 (d,  $J = 8.2$  Hz), 132.6 (d,  $J = 2.5$  Hz), 129.9 (d,  $J = 8.3$  Hz), 124.8 (d,  $J = 3.1$  Hz), 116.5 (d,  $J = 21$  Hz), 116.1 (d,  $J = 23$  Hz), 73.9. HRMS (EI-TOF) Calculated for  $\text{C}_8\text{H}_5\text{ClIF}$  ( $\text{M}^+$ ) 281.9108, found 281.9103.

**(E)-3-(1-chloro-2-iodovinyl)phenol (3h).** Purified by column chromatography on silica gel (eluant: petroleum ether/ethyl acetate = 10:1). Colorless oil (52 mg, 95%).  $^1\text{H}$  NMR (400 MHz,  $\text{CDCl}_3$ )  $\delta$  7.29 (d,  $J = 7.9$  Hz, 1H), 7.10 (d,  $J = 7.7$  Hz, 1H), 7.02 – 6.95 (m, 1H), 6.91 – 6.85 (m, 1H), 6.76 (s, 1H), 5.01 (s, 1H).  $^{13}\text{C}$  NMR (101 MHz,  $\text{CDCl}_3$ )  $\delta$  155.2, 139.1, 133.5, 129.6, 121.5, 116.6, 115.8, 73.2. HRMS (ESI-ORBITRAP) Calculated for  $\text{C}_8\text{H}_5\text{ClIO}$  ( $\text{M}-\text{H}^-$ ) 278.9074, found 278.9068.

**(E)-N-(3-(1-chloro-2-iodovinyl)phenyl)-N',4-dimethylbenzenesulfonamide (3i).** Purified by column chromatography on silica gel (eluant: petroleum ether/ethyl acetate = 20:1). Colorless oil (76 mg, 86%). <sup>1</sup>H NMR (400 MHz, CDCl<sub>3</sub>) δ 7.46 (d, *J* = 8.1 Hz, 2H), 7.39 – 7.38 (m, 2H), 7.32 – 7.22 (m, 3H), 7.17 (s, 1H), 6.77 (s, 1H), 3.21 (s, 3H), 2.43 (s, 3H). <sup>13</sup>C NMR (101 MHz, CDCl<sub>3</sub>) δ 143.7, 141.6, 138.3, 133.2, 133.0, 129.5, 128.9, 128.0, 127.9, 127.6, 126.3, 73.9, 37.9, 21.5. HRMS (ESI-ORBITRAP) Calculated for C<sub>16</sub>H<sub>16</sub>ClINO<sub>2</sub>S (M+H)<sup>+</sup> 447.9635, found 447.9629.

**(E)-1-(4-(1-chloro-2-iodovinyl)phenyl)ethan-1-one (3j).** Purified by column chromatography on silica gel (eluant: petroleum ether/ethyl acetate = 30:1). Yellow oil (50 mg, 83%). <sup>1</sup>H NMR (400 MHz, CDCl<sub>3</sub>) δ 7.99 (d, *J* = 8.3 Hz, 2H), 7.62 (d, *J* = 8.3 Hz, 2H), 6.86 (s, 1H), 2.62 (s, 3H). <sup>13</sup>C NMR (101 MHz, CDCl<sub>3</sub>) δ 197.2, 142.0, 137.5, 132.9, 129.3, 128.3, 74.5, 26.7. HRMS (ESI-ORBITRAP) Calculated for C<sub>10</sub>H<sub>9</sub>ClIO (M+H)<sup>+</sup> 306.9386, found 306.9381.

**Methyl (E)-4-(1-chloro-2-iodovinyl)benzoate (3k).** Purified by column chromatography on silica gel (eluant: petroleum ether/ethyl acetate = 50:1). Colorless oil (54 mg, 85%). <sup>1</sup>H NMR (400 MHz, CDCl<sub>3</sub>) δ 8.07 (d, *J* = 8.2 Hz, 2H), 7.59 (d, *J* = 8.2 Hz, 2H), 6.85 (s, 1H), 3.93 (s, 3H). <sup>13</sup>C NMR (101 MHz, CDCl<sub>3</sub>) δ 166.3, 141.9, 133.0, 130.9, 129.6, 129.1, 74.4, 52.3. HRMS (ESI-ORBITRAP) Calculated for C<sub>10</sub>H<sub>9</sub>ClIO<sub>2</sub> (M+H)<sup>+</sup> 322.9336, found 322.9330.

**(E)-1-(1-chloro-2-iodovinyl)-4-(trifluoromethyl)benzene (3l).** Purified by column chromatography on silica gel (eluant: petroleum ether = 8:1). Colorless oil (50 mg, 77%). <sup>1</sup>H NMR (400 MHz, CDCl<sub>3</sub>) δ 7.66 – 7.62 (m, 4H), 6.88 (s, 1H). <sup>19</sup>F NMR (377 MHz, CDCl<sub>3</sub>) δ -62.89 (s). <sup>13</sup>C NMR (101 MHz, CDCl<sub>3</sub>) δ 141.1, 132.5, 131.3 (q, *J* = 33.3 Hz), 129.4, 125.4 (q, *J* = 4.0 Hz), 123.7 (q, *J* = 273.7 Hz), 74.6. HRMS (EI-TOF) Calculated for C<sub>9</sub>H<sub>5</sub>ClF<sub>3</sub>I (M<sup>+</sup>) 331.9077, found 331.9070.

**(E)-1-(1-chloro-2-iodovinyl)-4-(trifluoromethoxy)benzene (3m).** Purified by column chromatography on silica gel (eluant: petroleum ether = 8:1). Colorless oil (68 mg, 90%). <sup>1</sup>H NMR (400 MHz, CDCl<sub>3</sub>) δ 7.61 (d, *J* = 8.7 Hz, 2H), 7.28 (d, *J* = 7.8 Hz, 2H), 6.85 (s, 1H). <sup>19</sup>F NMR (377 MHz, CDCl<sub>3</sub>) δ -57.70 (s). <sup>13</sup>C NMR (101 MHz, CDCl<sub>3</sub>) δ 149.6, 136.1, 132.7, 130.8, 120.5, 120.3 (q, *J* = 256 Hz), 73.9. HRMS (EI-TOF) Calculated for C<sub>9</sub>H<sub>5</sub>ClF<sub>3</sub>IO (M<sup>+</sup>) 347.9026, found 347.9020.

**(E)-1-chloro-4-(1-chloro-2-iodovinyl)benzene (3n).** Purified by column chromatography on silica gel (eluant: petroleum ether = 9:1). Colorless oil (56 mg, 96%). <sup>1</sup>H NMR (400 MHz, CDCl<sub>3</sub>) δ 7.47 (d, *J* = 8.5 Hz, 2H),

7.38 (d,  $J = 8.5$  Hz, 2H), 6.79 (s, 1H).  $^{13}\text{C}$  NMR (101 MHz,  $\text{CDCl}_3$ )  $\delta$  136.0, 135.4, 133.0, 130.4, 128.6, 73.6. HRMS (EI-TOF) Calculated for  $\text{C}_8\text{H}_5\text{Cl}_2\text{I}$  ( $\text{M}^+$ ) 297.8813, found 297.8819.

**(E)-1-bromo-4-(1-chloro-2-iodovinyl)benzene (3o)**. Purified by column chromatography on silica gel (eluant: petroleum ether = 8:1). Colorless oil (64 mg, 94%).  $^1\text{H}$  NMR (400 MHz,  $\text{CDCl}_3$ )  $\delta$  7.57 – 7.52 (m, 2H), 7.41 (d,  $J = 8.5$  Hz, 2H), 6.79 (s, 1H).  $^{13}\text{C}$  NMR (101 MHz,  $\text{CDCl}_3$ )  $\delta$  136.5, 133.0, 131.5, 130.6, 123.7, 73.7. HRMS (EI-TOF) Calculated for  $\text{C}_8\text{H}_5\text{BrClI}$  ( $\text{M}^+$ ) 341.8308, found 341.8301.

**(E)-1-(tert-butyl)-4-(1-chloro-2-iodovinyl)benzene (3p)**. Purified by column chromatography on silica gel (eluant: petroleum ether = 8:1). Colorless oil (63 mg, 98%).  $^1\text{H}$  NMR (400 MHz,  $\text{CDCl}_3$ )  $\delta$  7.50 (d,  $J = 8.6$  Hz, 2H), 7.42 (d,  $J = 8.6$  Hz, 2H), 6.73 (s, 1H), 1.35 (s, 9H).  $^{13}\text{C}$  NMR (101 MHz,  $\text{CDCl}_3$ )  $\delta$  152.7, 134.5, 134.2, 128.7, 125.1, 72.0, 34.8, 31.2. HRMS (EI-TOF) Calculated for  $\text{C}_{12}\text{H}_{14}\text{ClI}$  ( $\text{M}^+$ ) 319.9829, found 319.9833.

**(E)-4-(1-chloro-2-iodovinyl)-1, 1'-biphenyl (3q)**. Purified by column chromatography on silica gel (eluant: petroleum ether = 7:1). Colorless oil (62 mg, 93%).  $^1\text{H}$  NMR (400 MHz,  $\text{CDCl}_3$ )  $\delta$  7.70 - 7.68 (m, 6H), 7.53 (t,  $J = 7.3$  Hz, 2H), 7.46 - 7.43 (m, 1H), 6.85 (s, 1H).  $^{13}\text{C}$  NMR (101 MHz,  $\text{CDCl}_3$ )  $\delta$  142.3, 140.2, 136.4, 133.9, 129.5, 128.9, 127.9, 127.2, 127.0, 73.0. HRMS (EI-TOF) Calculated for  $\text{C}_{14}\text{H}_{10}\text{ClI}$  ( $\text{M}^+$ ) 339.9516, found 339.9510.

**(E)-1-(benzyloxy)-4-(1-chloro-2-iodovinyl)benzene (3r)**. Purified by column chromatography on silica gel (eluant: petroleum ether/ethyl acetate = 50:1). Colorless oil (66 mg, 89%).  $^1\text{H}$  NMR (400 MHz,  $\text{CDCl}_3$ )  $\delta$  7.58 – 7.52 (m, 2H), 7.46 – 7.34 (m, 5H), 7.03 (d,  $J = 8.8$  Hz, 2H), 6.72 (s, 1H), 5.13 (s, 2H).  $^{13}\text{C}$  NMR (101 MHz,  $\text{CDCl}_3$ )  $\delta$  159.5, 136.5, 134.0, 130.6, 130.0, 128.6, 128.1, 127.5, 114.4, 71.7, 70.1. HRMS (EI-TOF) Calculated for  $\text{C}_{15}\text{H}_{12}\text{ClIO}$  ( $\text{M}^+$ ) 369.9621, found 369.9620.

**(E)-2-(1-chloro-2-iodovinyl)naphthalene (3s)**. Purified by column chromatography on silica gel (eluant: petroleum ether = 15:1). Colorless oil (56 mg, 89%).  $^1\text{H}$  NMR (400 MHz,  $\text{CDCl}_3$ )  $\delta$  8.04 – 8.03 (m, 1H), 7.91 – 7.85 (m, 3H), 7.60 (dd,  $J = 8.6, 1.8$  Hz, 1H), 7.57 – 7.51 (m, 2H), 6.85 (s, 1H).  $^{13}\text{C}$  NMR (101 MHz,  $\text{CDCl}_3$ )  $\delta$  134.9, 134.2, 133.4, 132.5, 129.0, 128.4, 128.1, 127.8, 127.2, 126.6, 125.8, 73.2. HRMS (EI-TOF) Calculated for  $\text{C}_{12}\text{H}_8\text{ClI}$  ( $\text{M}^+$ ) 313.9359, found 313.9350.

**(E)-2-(1-chloro-2-iodovinyl)benzofuran (3t)**. Purified by column chromatography on silica gel (eluant: petroleum ether = 15:1). Colorless oil (54 mg, 91%).  $^1\text{H}$  NMR (400 MHz,  $\text{CDCl}_3$ )  $\delta$  7.66 (d,  $J = 7.7$  Hz, 1H), 7.57 (d,  $J = 8.3$  Hz, 1H), 7.44 – 7.39 (m, 2H), 7.34 – 7.29 (m, 1H), 6.95 (s, 1H).  $^{13}\text{C}$  NMR (101 MHz,  $\text{CDCl}_3$ )

$\delta$  154.7, 150.2, 127.5, 126.1, 124.2, 123.5, 121.8, 111.6, 110.3, 71.6. HRMS (EI-TOF) Calculated for  $C_{10}H_6ClIO$  ( $M^+$ ) 303.9152, found 303.9148.

**(E)-2-(1-chloro-2-iodovinyl)benzo[b]thiophene (3u).** Purified by column chromatography on silica gel (eluant: petroleum ether = 15:1). Colorless oil (60 mg, 93%).  $^1H$  NMR (400 MHz,  $CDCl_3$ )  $\delta$  7.93 (s, 1H), 7.82 (dd,  $J = 7.6, 1.5$  Hz, 2H), 7.44 - 7.37 (m, 2H), 6.93 (s, 1H).  $^{13}C$  NMR (101 MHz,  $CDCl_3$ )  $\delta$  140.4, 138.2, 138.1, 128.3, 128.1, 125.9, 124.8, 124.5, 122.1, 72.7. HRMS (EI-TOF) Calculated for  $C_{10}H_6ClIS$  ( $M^+$ ) 319.8923, found 319.8917.

**(E)-1-(1-chloro-2-iodovinyl)-9H-fluorene (3v).** Purified by column chromatography on silica gel (eluant: petroleum ether = 8:1). Colorless oil (60 mg, 87%).  $^1H$  NMR (400 MHz,  $CDCl_3$ )  $\delta$  7.85 - 7.82 (m, 2H), 7.74 (s, 1H), 7.60 (d,  $J = 8.4$  Hz, 2H), 7.46 - 7.37 (m, 2H), 6.82 (s, 1H), 3.97 (s, 2H).  $^{13}C$  NMR (101 MHz,  $CDCl_3$ )  $\delta$  143.7, 143.1, 143.0, 140.8, 135.8, 134.6, 128.0, 127.4, 126.9, 125.6, 125.1, 120.3, 119.5, 72.7, 36.9. HRMS (EI-TOF) Calculated for  $C_{15}H_{10}ClI$  ( $M^+$ ) 351.9516, found 351.9511.

**(E)-(1-chloro-2-iodoprop-1-en-1-yl)benzene (3w).** Purified by column chromatography on silica gel (eluant: petroleum ether = 15:1). Colorless oil (54 mg, 98%)<sup>7</sup>.  $^1H$  NMR (400 MHz,  $CDCl_3$ )  $\delta$  7.46 - 7.35 (m, 5H), 2.78 (s, 3H).  $^{13}C$  NMR (101 MHz,  $CDCl_3$ )  $\delta$  141.8, 129.2, 129.0, 128.8, 128.3, 92.0, 31.3.

**(E)-(1-chloro-2-iodobut-1-en-1-yl)benzene (3x).** Purified by column chromatography on silica gel (eluant: petroleum ether = 8:1). Colorless oil (56 mg, 97%)<sup>7</sup>.  $^1H$  NMR (400 MHz,  $CDCl_3$ )  $\delta$  7.57 - 7.28 (m, 5H), 2.88 (q,  $J = 7.4$  Hz, 2H), 1.20 (t,  $J = 7.4$  Hz, 3H).  $^{13}C$  NMR (101 MHz,  $CDCl_3$ )  $\delta$  141.9, 129.2, 128.8, 128.3, 127.7, 102.8, 36.3, 13.1.

**(E)-(1-chloro-2-iodopent-1-en-1-yl)benzene (3y).** Purified by column chromatography on silica gel (eluant: petroleum ether = 8:1). Colorless oil (55 mg, 90%).  $^1H$  NMR (400 MHz,  $CDCl_3$ )  $\delta$  7.49 - 7.30 (m, 5H), 2.90 - 2.80 (m, 2H), 1.72 - 1.70 (m, 2H), 1.07 - 1.03 (m, 3H).  $^{13}C$  NMR (101 MHz,  $CDCl_3$ )  $\delta$  142.1, 129.2, 128.7, 128.5, 128.3, 101.3, 43.9, 21.9, 12.9. HRMS (EI-TOF) Calculated for  $C_{11}H_{12}ClI$  ( $M^+$ ) 305.9672, found 305.9671.

**(E)-3-chloro-2-iodo-3-phenylprop-2-en-1-ol (3z).** Purified by column chromatography on silica gel (eluant: petroleum ether/ethyl acetate = 8:1). Colorless oil (56 mg, 95%).  $^1H$  NMR (400 MHz,  $CDCl_3$ )  $\delta$  7.46 - 7.34 (m, 5H), 4.62 (d,  $J = 6.4$  Hz, 2H), 2.15 (t,  $J = 6.4$  Hz, 1H).  $^{13}C$  NMR (101 MHz,  $CDCl_3$ )  $\delta$  140.9, 130.4, 129.3, 128.9, 128.4, 101.4, 67.8. HRMS (EI-TOF) Calculated for  $C_9H_8ClIO$  ( $M^+$ ) 293.9308, found 293.9311.

**(E)-(1-chloro-2-iodoethene-1,2-diyl)dibenzene (3aa).**<sup>8</sup> Purified by column chromatography on silica gel (eluant: petroleum ether = 8:1). Colorless oil (64 mg, 96%). <sup>1</sup>H NMR (400 MHz, CDCl<sub>3</sub>) δ 7.56 – 7.51 (m, 2H), 7.51 – 7.38 (m, 7H), 7.32 (t, *J* = 7.3 Hz, 1H).

**(E)-4-(1, 6-dichloro-2-iodohex-1-en-1-yl)phenyl methanesulfonate (3ab).** Purified by column chromatography on silica gel (eluant: petroleum ether/ethyl acetate = 5:1). Colorless oil (74 mg, 83%). <sup>1</sup>H NMR (400 MHz, CDCl<sub>3</sub>) δ 7.41 (d, *J* = 8.7 Hz, 2H), 7.30 (d, *J* = 8.7 Hz, 2H), 3.62 (t, *J* = 6.4 Hz, 2H), 3.17 (s, 3H), 2.88 (t, *J* = 7.2 Hz, 2H), 1.94 – 1.77 (m, 4H). <sup>13</sup>C NMR (101 MHz, CDCl<sub>3</sub>) δ 149.1, 140.8, 131.1, 127.4, 121.9, 101.3, 44.6, 41.3, 37.6, 31.2, 25.8. HRMS (ESI-ORBITRAP) Calculated for C<sub>13</sub>H<sub>19</sub>Cl<sub>2</sub>IO<sub>3</sub>SN (M+NH<sub>4</sub>)<sup>+</sup> 465.9507, found 465.9502.

**(E)-5-(1-chloro-2-iodo-5-phenylpent-1-en-1-yl)-1-tosyl-1H-indole (3ac).** Purified by column chromatography on silica gel (eluant: petroleum ether/ethyl acetate = 20:1). Colorless oil (100 mg, 88%). <sup>1</sup>H NMR (400 MHz, CDCl<sub>3</sub>) δ 8.01 (d, *J* = 8.6 Hz, 1H), 7.82 (d, *J* = 8.4 Hz, 2H), 7.63 (d, *J* = 3.7 Hz, 1H), 7.54 (d, *J* = 1.2 Hz, 1H), 7.37 – 7.30 (m, 3H), 7.30 – 7.24 (m, 5H), 6.69 – 6.68 (m, 1H), 2.97 – 2.89 (m, 2H), 2.81 – 2.73 (m, 2H), 2.39 (s, 3H), 2.09 – 1.98 (m, 2H). <sup>13</sup>C NMR (101 MHz, CDCl<sub>3</sub>) δ 145.2, 141.7, 137.1, 135.3, 134.5, 130.4, 130.0, 128.8, 128.5, 128.4, 127.1, 126.9, 125.9, 125.7, 122.4, 113.4, 109.0, 101.2, 41.9, 34.7, 30.2, 21.6. HRMS (ESI-ORBITRAP) Calculated for C<sub>26</sub>H<sub>24</sub>ClINO<sub>2</sub>S (M+H)<sup>+</sup> 576.0261, found 576.0262.

**(E)-4-chloro-3-iodo-4-phenylbut-3-en-2-one (3ad).** Purified by column chromatography on silica gel (eluant: petroleum ether/ethyl acetate = 30:1). Colorless oil (49 mg, 81%). <sup>1</sup>H NMR (400 MHz, CDCl<sub>3</sub>) δ 7.51 – 7.46 (m, 2H), 7.43 – 7.41 (m, 3H), 2.57 (s, 3H). <sup>13</sup>C NMR (101 MHz, CDCl<sub>3</sub>) δ 198.0, 138.4, 131.1, 129.9, 128.9, 128.4, 92.3, 27.4. HRMS (ESI-ORBITRAP) Calculated for C<sub>10</sub>H<sub>9</sub>ClIO (M+H)<sup>+</sup> 306.9386, found 306.9381.

**(E)-3-chloro-2-iodo-3-phenylacrylaldehyde (3ae).** Purified by column chromatography on silica gel (eluant: petroleum ether/ethyl acetate = 40:1). Colorless oil (50 mg, 86%). <sup>1</sup>H NMR (400 MHz, CDCl<sub>3</sub>) δ 9.44 (s, 1H), 7.55 – 7.51 (m, 2H), 7.49 – 7.45 (m, 3H). <sup>13</sup>C NMR (101 MHz, CDCl<sub>3</sub>) δ 186.1, 149.1, 139.9, 130.8, 128.6, 128.5, 103.8. HRMS (ESI-ORBITRAP) Calculated for C<sub>9</sub>H<sub>6</sub>ClIONa (M+Na)<sup>+</sup> 314.9050, found 314.9059.

**(E)-3-chloro-2-iodo-3-phenylacrylonitrile (3af).** Purified by column chromatography on silica gel (eluant: petroleum ether/ethyl acetate = 20:1). Colorless oil (26 mg, 46%). <sup>1</sup>H NMR (400 MHz, CDCl<sub>3</sub>) δ 7.57 – 7.41 (m, 5H). <sup>13</sup>C NMR (101 MHz, CDCl<sub>3</sub>) δ 148.9, 136.9, 131.3, 128.7, 128.6, 116.7, 52.5. HRMS (EI-TOF) Calculated for C<sub>9</sub>H<sub>5</sub>ClIN (M<sup>+</sup>) 288.9155, found 288.9162.

**(8R, 9S, 13S, 14S)-3-((E)-1-chloro-2-iodovinyl)-13-methyl-6, 7, 8, 9, 11, 12, 13, 14, 15, 16-decahydro-17H-cyclopenta[a]phenanthren-17-one (3ag).** Purified by column chromatography on silica gel (eluant: petroleum ether/ethyl acetate = 30:1). Colorless oil (66 mg, 75%). <sup>1</sup>H NMR (400 MHz, CDCl<sub>3</sub>) δ 7.32 (s, 2H), 7.27 (s, 1H), 6.71 (s, 1H), 2.95 (dd, *J* = 8.5, 3.8 Hz, 2H), 2.52 (dd, *J* = 18.8, 8.6 Hz, 1H), 2.47 – 2.40 (m, 1H), 2.36 – 2.29 (m, 1H), 2.17 (dd, *J* = 18.4, 9.3 Hz, 1H), 2.11 – 2.02 (m, 2H), 2.01 – 1.95 (m, 1H), 1.69 – 1.61 (m, 2H), 1.60 – 1.59 (m, 1H), 1.57 – 1.49 (m, 3H), 0.92 (s, 3H). <sup>13</sup>C NMR (101 MHz, CDCl<sub>3</sub>) δ 141.4, 136.6, 134.9, 134.1, 129.4, 126.4, 125.2, 72.1, 50.5, 47.9, 44.5, 37.9, 35.8, 31.6, 29.3, 26.4, 25.6, 21.6, 13.9. HRMS (ESI-ORBITRAP) Calculated for C<sub>20</sub>H<sub>23</sub>ClIO (M+H)<sup>+</sup> 441.0482, found 441.0479.

**(1R, 2S, 5R)-2-isopropyl-5-methylcyclohexyl 3-((E)-1-chloro-2-iodovinyl)benzoate (3ah).** Purified by column chromatography on silica gel (eluant: petroleum ether/ethyl acetate = 30:1). Colorless oil (72 mg, 82%). <sup>1</sup>H NMR (400 MHz, CDCl<sub>3</sub>) δ 8.24 (d, *J* = 1.5 Hz, 1H), 8.09 (dd, *J* = 7.8, 1.2 Hz, 1H), 7.78 – 7.70 (m, 1H), 7.52 (t, *J* = 7.8 Hz, 1H), 6.86 (s, 1H), 5.01 – 4.94 (m, 1H), 2.17–2.14 (m, 1H), 2.05 – 1.96 (m, 1H), 1.79 – 1.73 (m, 2H), 1.63 – 1.54 (m, 2H), 1.21 – 1.10 (m, 2H), 0.97– 0.94 (m, 7H), 0.82 (d, *J* = 6.9 Hz, 3H). <sup>13</sup>C NMR (101 MHz, CDCl<sub>3</sub>) δ 165.3, 137.9, 133.1, 131.1, 130.5, 130.3, 128.4, 75.3, 73.9, 47.3, 40.9, 34.3, 31.5, 26.5, 23.7, 22.1, 20.8, 16.6. HRMS (ESI-ORBITRAP) Calculated for C<sub>19</sub>H<sub>25</sub>ClIO<sub>2</sub> (M+H)<sup>+</sup> 447.0588, found 447.0582.

**(3aS, 5S, 6R, 6aS)-5-((S)-2, 2-dimethyl-1,3-dioxolan-4-yl)-2, 2-dimethyltetrahydrofuro [2, 3-d][1, 3]dioxol-6-yl 3-((E)-1-chloro-2-iodovinyl)benzoate (3ai).** Purified by column chromatography on silica gel (eluant: petroleum ether/ethyl acetate = 10:1). Colorless oil (97 mg, 89%). <sup>1</sup>H NMR (400 MHz, CDCl<sub>3</sub>) δ 8.08 (t, *J* = 1.5 Hz, 1H), 8.00 – 7.91 (m, 1H), 7.68 – 7.62 (m, 1H), 7.42 (t, *J* = 7.8 Hz, 1H), 6.75 (s, 1H), 5.86 (d, *J* = 3.7 Hz, 1H), 5.40 (d, *J* = 2.9 Hz, 1H), 4.55 (d, *J* = 3.7 Hz, 1H), 4.33 – 4.19 (m, 2H), 4.05 – 4.01 (m, 2H), 1.46 (s, 3H), 1.31 (s, 3H), 1.22 (s, 3H), 1.17 (s, 3H). <sup>13</sup>C NMR (101 MHz, CDCl<sub>3</sub>) δ 164.4, 138.2, 133.8, 132.8, 130.6, 130.4, 129.8, 128.7, 112.4, 109.5, 105.1, 83.4, 80.0, 74.4, 72.6, 67.4, 26.8, 26.7, 26.2, 25.2. HRMS (ESI-ORBITRAP) Calculated for C<sub>21</sub>H<sub>25</sub>ClIO<sub>7</sub> (M+H)<sup>+</sup> 551.0328, found 551.0325.

**(E)-2-(1-chloro-2-iodovinyl)benzyl 2-(10-oxo-10,11-dihydrodibenzo[b, f]thiepin-2-yl)propanoate (3aj).** Purified by column chromatography on silica gel (eluant: petroleum ether/ethyl acetate = 20:1). Colorless oil (80 mg, 71%). <sup>1</sup>H NMR (400 MHz, CDCl<sub>3</sub>) δ 8.16 (d, *J* = 7.9 Hz, 1H), 7.55 (dd, *J* = 7.9, 4.0 Hz, 2H), 7.42 – 7.34 (m, 2H), 7.33 – 7.23 (m, 4H), 7.20 – 7.15 (m, 1H), 7.12 (dd, *J* = 8.0, 1.4 Hz, 1H), 6.72 (s, 1H), 5.14–5.04 (m, 2H), 4.31 (s, 2H), 3.75 (q, *J* = 7.1 Hz, 1H), 1.46 (d, *J* = 7.2 Hz, 3H). <sup>13</sup>C NMR (101 MHz, CDCl<sub>3</sub>) δ 191.2,

173.5, 142.5, 140.2, 137.9, 137.8, 136.2, 133.3, 133.2, 132.5, 131.5, 131.5, 130.9, 129.8, 129.3, 129.1, 128.7, 128.7, 126.8, 126.5, 77.7, 64.1, 51.1, 45.1, 18.5. HRMS (ESI-ORBITRAP) Calculated for  $C_{26}H_{21}ClIO_3S$  (M+H)<sup>+</sup> 574.9944, found 574.9935.

**(E)-(1-chloro-2-iodovinyl)cyclopropane (3ak).** Purified by column chromatography on silica gel (eluant: petroleum ether = 8:1). Colorless oil (36 mg, 80%). <sup>1</sup>H NMR (400 MHz, CDCl<sub>3</sub>) δ 6.27 (s, 1H), 2.23 – 2.16 (m, 1H), 0.98 – 0.90 (m, 2H), 0.85 – 0.80 (m, 2H). <sup>13</sup>C NMR (101 MHz, CDCl<sub>3</sub>) δ 138.7, 70.3, 18.4, 6.4. HRMS (EI-TOF) Calculated for C<sub>3</sub>H<sub>6</sub>ClI (M<sup>+</sup>) 227.9203, found 227.9211.

**(E)- (1-chloro-2-iodovinyl)cyclopentane (3al).** Purified by column chromatography on silica gel (eluant: petroleum ether = 7:1). Colorless oil (42 mg, 83%). <sup>1</sup>H NMR (400 MHz, CDCl<sub>3</sub>) δ 6.25 (s, 1H), 3.46 – 3.36 (m, 1H), 1.88 – 1.75 (m, 4H), 1.72 – 1.62 (m, 4H). <sup>13</sup>C NMR (101 MHz, CDCl<sub>3</sub>) δ 142.3, 71.0, 46.4, 30.3, 25.9. HRMS (EI-TOF) Calculated for C<sub>7</sub>H<sub>10</sub>ClI (M<sup>+</sup>) 255.9516, found 255.9510.

**(E)-2-chloro-1, 5-diiodopent-1-ene (3am).** Purified by column chromatography on silica gel (eluant: petroleum ether = 5:1). Colorless oil (61 mg, 86%). <sup>1</sup>H NMR (400 MHz, CDCl<sub>3</sub>) δ 6.92 (s, 1H), 3.57 (t, *J* = 6.5 Hz, 2H), 2.73 – 2.67 (m, 2H), 2.07 – 2.00 (m, 2H). <sup>13</sup>C NMR (101 MHz, CDCl<sub>3</sub>) δ 101.6, 80.6, 43.1, 42.4, 31.1. HRMS (EI-TOF) Calculated for C<sub>5</sub>H<sub>7</sub>ClI<sub>2</sub> (M<sup>+</sup>) 355.8326, found 355.8321.

**(E)-6-chloro-7-iodohept-6-en-1-ol (3an).** Purified by column chromatography on silica gel (eluant: petroleum ether/ethyl acetate = 5:1). Colorless oil (48 mg, 89%). <sup>1</sup>H NMR (400 MHz, CDCl<sub>3</sub>) δ 6.29 (s, 1H), 3.66 (t, *J* = 6.5 Hz, 2H), 2.61 – 2.56 (m, 2H), 1.64 – 1.58 (m, 4H), 1.46 – 1.39 (m, 2H). <sup>13</sup>C NMR (101 MHz, CDCl<sub>3</sub>) δ 138.0, 72.5, 62.8, 38.4, 32.5, 26.5, 24.6. HRMS (EI-TOF) Calculated for C<sub>7</sub>H<sub>12</sub>ClIO (M<sup>+</sup>) 273.9621, found 273.9616.

**(E)-5-chloro-6-iodohex-5-en-1-yl 4-methylbenzenesulfonate (3ao).** Purified by column chromatography on silica gel (eluant: petroleum ether/ethyl acetate = 20:1). Colorless oil (66 mg, 81%). <sup>1</sup>H NMR (400 MHz, CDCl<sub>3</sub>) δ 7.83 (d, *J* = 8.3 Hz, 2H), 7.38 (d, *J* = 8.0 Hz, 2H), 6.33 (s, 1H), 4.09 (t, *J* = 6.0 Hz, 2H), 2.57 (t, *J* = 6.9 Hz, 2H), 2.48 (s, 3H), 1.74 – 1.64 (m, 4H). <sup>13</sup>C NMR (101 MHz, CDCl<sub>3</sub>) δ 144.8, 137.1, 133.1, 129.9, 127.9, 73.2, 70.0, 37.6, 27.5, 22.6, 21.7. HRMS (ESI-ORBITRAP) Calculated for C<sub>13</sub>H<sub>20</sub>ClIO<sub>3</sub>SN (M+NH<sub>4</sub>)<sup>+</sup> 431.9897, found 431.9892.

**(E)-6-chloro-7-iodohept-6-en-1-yl benzoate (3ap).** Purified by column chromatography on silica gel (eluant: petroleum ether/ethyl acetate = 30:1). Colorless oil (58 mg, 77%). <sup>1</sup>H NMR (400 MHz, CDCl<sub>3</sub>) δ 8.05 (d, *J* =

7.5 Hz, 2H), 7.55 (t,  $J = 7.4$  Hz, 1H), 7.44 (t,  $J = 7.6$  Hz, 2H), 6.31 (s, 1H), 4.34 (t,  $J = 6.6$  Hz, 2H), 2.61 (t,  $J = 7.3$  Hz, 2H), 1.89 – 1.78 (m, 2H), 1.73 – 1.64 (m, 2H), 1.55 – 1.50 (m, 2H).  $^{13}\text{C}$  NMR (101 MHz,  $\text{CDCl}_3$ )  $\delta$  166.6, 137.9, 132.8, 130.5, 129.6, 128.3, 72.6, 64.8, 38.4, 28.5, 26.3, 24.9. HRMS (ESI-ORBITRAP) Calculated for  $\text{C}_{14}\text{H}_{17}\text{ClIO}_2$  ( $\text{M}+\text{H}$ ) $^+$  378.9962, found 378.9958.

**(E)-2-(5-chloro-6-iodohex-5-en-1-yl)isoindoline-1,3-dione (3aq).** Purified by column chromatography on silica gel (eluant: petroleum ether/ethyl acetate = 10:1). Colorless oil (56 mg, 73%).  $^1\text{H}$  NMR (400 MHz,  $\text{CDCl}_3$ )  $\delta$  7.86 – 7.53 (m, 2H), 7.72 – 7.70 (m, 2H), 6.31 (s, 1H), 3.72 (t,  $J = 7.0$  Hz, 2H), 2.62 (t,  $J = 7.1$  Hz, 2H), 1.77 – 1.64 (m, 4H).  $^{13}\text{C}$  NMR (101 MHz,  $\text{CDCl}_3$ )  $\delta$  168.4, 137.5, 133.9, 132.1, 123.2, 72.9, 37.9, 37.7, 27.4, 23.9. HRMS (ESI-ORBITRAP) Calculated for  $\text{C}_{14}\text{H}_{14}\text{ClINO}_2$  ( $\text{M}+\text{H}$ ) $^+$  389.9758, found 389.9751.

**(E)-1, 2, 4-trichloro-3-iodobut-2-ene (3ar).** Purified by column chromatography on silica gel (eluant: petroleum ether = 8:1). Colorless oil (50 mg, 90%).  $^1\text{H}$  NMR (400 MHz,  $\text{CDCl}_3$ )  $\delta$  4.57 (s, 2H), 4.50 (s, 2H).  $^{13}\text{C}$  NMR (101 MHz,  $\text{CDCl}_3$ )  $\delta$  132.5, 97.4, 52.1, 51.4. HRMS (EI-TOF) Calculated for  $\text{C}_4\text{H}_4\text{Cl}_3\text{I}$  ( $\text{M}^+$ ) 283.8430, found 283.8423.

**(E)-4-chloro-5-iodooct-4-ene (3as).** Purified by column chromatography on silica gel (eluant: petroleum ether). Colorless oil (47 mg, 87%).  $^1\text{H}$  NMR (400 MHz,  $\text{CDCl}_3$ )  $\delta$  2.70 – 2.61 (m, 4H), 1.64 – 1.53 (m, 4H), 0.97 – 0.91 (m, 6H).  $^{13}\text{C}$  NMR (101 MHz,  $\text{CDCl}_3$ )  $\delta$  131.5, 99.2, 44.7, 43.6, 21.7, 20.5, 13.1, 12.8. HRMS (EI-TOF) Calculated for  $\text{C}_8\text{H}_{14}\text{ClI}$  ( $\text{M}^+$ ) 271.9829, found 271.9833.

**(E)-1-(1-chloro-2-iodoprop-1-en-1-yl)cyclohexan-1-ol (3at).** Purified by column chromatography on silica gel (eluant: petroleum ether/ethyl acetate = 10:1). Colorless oil (48 mg, 80%).  $^1\text{H}$  NMR (400 MHz,  $\text{CDCl}_3$ )  $\delta$  2.79 (s, 1H), 2.54 (d,  $J = 1.4$  Hz, 3H), 2.13 – 2.05 (m, 2H), 1.84 – 1.80 (m, 2H), 1.71 – 1.54 (m, 5H), 1.28 – 1.13 (m, 1H).  $^{13}\text{C}$  NMR (101 MHz,  $\text{CDCl}_3$ )  $\delta$  125.3, 113.6, 75.9, 36.9, 35.6, 25.1, 22.3. HRMS (ESI-ORBITRAP) Calculated for  $\text{C}_9\text{H}_{15}\text{ClIO}$  ( $\text{M}+\text{H}$ ) $^+$  300.9856, found 300.9860.

**(E)-(((3-chloro-2-iodonon-2-en-4-yl)oxy)methyl)benzene (3au).** Purified by column chromatography on silica gel (eluant: petroleum ether/ethyl acetate = 50:1). Colorless oil (58 mg, 76%).  $^1\text{H}$  NMR (400 MHz,  $\text{CDCl}_3$ )  $\delta$  7.42 – 7.27 (m, 5H), 4.52 – 4.18 (m, 2H), 3.99 (t,  $J = 6.7$  Hz, 1H), 2.48 (s, 3H), 1.70 – 1.61 (m, 1H), 1.52 – 1.44 (m, 1H), 1.29 – 1.26 (m, 6H), 0.87 (t,  $J = 6.7$  Hz, 3H).  $^{13}\text{C}$  NMR (101 MHz,  $\text{CDCl}_3$ )  $\delta$  137.9, 129.5, 128.3, 128.2, 127.6, 107.9, 78.5, 70.3, 35.3, 31.6, 31.1, 24.3, 22.5, 14.0. HRMS (ESI-ORBITRAP) Calculated for  $\text{C}_{16}\text{H}_{26}\text{ClION}$  ( $\text{M}+\text{NH}_4$ ) $^+$  410.0747, found 410.0742.



**Methyl (E)-3-chloro-2-iodooct-2-enoate (3av).** Purified by column chromatography on silica gel (eluant: petroleum ether/ethyl acetate = 30:1). Colorless oil (42 mg, 70%). <sup>1</sup>H NMR (400 MHz, CDCl<sub>3</sub>) δ 3.83 (s, 3H), 2.72 – 2.65 (m, 2H), 1.65 – 1.56 (m, 2H), 1.36 – 1.34 (m, 4H), 0.91 (t, *J* = 6.7 Hz, 3H). <sup>13</sup>C NMR (101 MHz, CDCl<sub>3</sub>) δ 165.4, 139.7, 79.5, 53.2, 41.7, 30.7, 26.4, 22.4, 13.8. HRMS (ESI-ORBITRAP) Calculated for C<sub>9</sub>H<sub>15</sub>ClIO<sub>2</sub> (M+H)<sup>+</sup> 316.9805, found 316.9800.

**(E)-(2-chloro-1-iodo-2-phenylvinyl)(methyl)sulfane (3aw).** Purified by column chromatography on silica gel (eluant: petroleum ether = 15:1). Colorless oil (51 mg, 83%). <sup>1</sup>H NMR (400 MHz, CDCl<sub>3</sub>) δ 7.37 – 7.31 (m, 4H), 7.31 – 7.27 (m, 1H), 2.53 (s, 3H). <sup>13</sup>C NMR (101 MHz, CDCl<sub>3</sub>) δ 142.6, 129.1, 128.9, 128.3, 128.2, 93.1, 18.5. HRMS (EI-TOF) Calculated for C<sub>9</sub>H<sub>8</sub>ClIS (M<sup>+</sup>) 309.9081, found 309.9074.

**(E)-(2,5-dichloro-1-iodopent-1-en-1-yl)(phenyl)sulfane (3ax).** Purified by column chromatography on silica gel (eluant: petroleum ether = 8:1). Colorless oil (56 mg, 77%). <sup>1</sup>H NMR (400 MHz, CDCl<sub>3</sub>) δ 7.33 (d, *J* = 8.1 Hz, 2H), 7.18 (d, *J* = 7.9 Hz, 2H), 3.57 (t, *J* = 6.6 Hz, 2H), 2.97 – 2.92 (m, 2H), 2.36 (s, 3H), 2.12 – 2.04 (m, 2H). <sup>13</sup>C NMR (101 MHz, CDCl<sub>3</sub>) δ 138.9, 132.6, 130.0, 128.7, 127.9, 104.1, 43.3, 40.7, 31.5, 21.3. HRMS (EI-TOF) Calculated for C<sub>12</sub>H<sub>13</sub>Cl<sub>2</sub>IS (M<sup>+</sup>) 385.9160, found 385.9166.

**(E)-1-((2-chloro-1-iodohept-1-en-1-yl)oxy)-4-methylbenzene (3ay).** Purified by column chromatography on silica gel (eluant: petroleum ether = 8:1). Colorless oil (60 mg, 85%). <sup>1</sup>H NMR (400 MHz, CDCl<sub>3</sub>) δ 7.15 (d, *J* = 8.5 Hz, 2H), 6.90 (d, *J* = 8.5 Hz, 2H), 2.64 – 2.56 (m, 2H), 2.32 (s, 3H), 1.66 – 1.58 (m, 2H), 1.40 – 1.37 (m, 4H), 0.95 (t, *J* = 6.8 Hz, 3H). <sup>13</sup>C NMR (101 MHz, CDCl<sub>3</sub>) δ 152.0, 133.7, 130.2, 117.3, 104.1, 91.1, 43.9, 30.6, 28.3, 22.5, 20.8, 14.0. HRMS (EI-TOF) Calculated for C<sub>14</sub>H<sub>18</sub>ClIO (M<sup>+</sup>) 364.0087, found 364.0091.

**(E)-(2-chloro-1-iodo-2-phenylvinyl)trimethylsilane (3az).**<sup>9</sup> Purified by column chromatography on silica gel (eluant: petroleum ether = 10:1). Colorless oil (53 mg, 80%). <sup>1</sup>H NMR (600 MHz, CDCl<sub>3</sub>) δ 7.37 – 7.35 (m, 3H), 7.32 (dd, *J* = 7.7, 1.7 Hz, 2H), -0.02 (s, 9H). <sup>13</sup>C NMR (151 MHz, CDCl<sub>3</sub>) δ 145.8, 139.7, 129.3, 128.7, 128.3, 109.4, 0.9.

**(E)-(1,2-dichloro-2-iodovinyl)benzene (3ba).** Purified by column chromatography on silica gel (eluant: petroleum ether = 15:1). Colorless oil (58 mg, 98%). <sup>1</sup>H NMR (400 MHz, CDCl<sub>3</sub>) δ 7.41 (s, 5H). <sup>13</sup>C NMR (101 MHz, CDCl<sub>3</sub>) δ 139.3, 133.4, 129.6, 129.2, 128.6, 69.7. HRMS (EI-TOF) Calculated for C<sub>8</sub>H<sub>5</sub>Cl<sub>2</sub>I (M<sup>+</sup>) 297.8813, found 297.8818.

**(E)-(2-bromo-1-chloro-2-iodovinyl)benzene (3bb).**<sup>10</sup> Purified by column chromatography on silica gel (eluant: petroleum ether = 15:1). Colorless oil (64 mg, 94%). <sup>1</sup>H NMR (400 MHz, CDCl<sub>3</sub>) δ 7.40 (s, 5H). <sup>13</sup>C NMR (101 MHz, CDCl<sub>3</sub>) δ 139.7, 136.0, 129.6, 128.8, 128.6, 51.8.

**(1-chloro-2,2-diiodovinyl)benzene (3bc).**<sup>11</sup> Purified by column chromatography on silica gel (eluant: petroleum ether = 15:1). Colorless oil (70 mg, 90%). <sup>1</sup>H NMR (400 MHz, CDCl<sub>3</sub>) δ 7.38 (d, *J* = 8.9 Hz, 5H). <sup>13</sup>C NMR (101 MHz, CDCl<sub>3</sub>) δ 140.7, 139.6, 129.4, 128.6, 128.5, 14.3.

**(E)-1-(2-bromo-1-chloro-2-iodovinyl)-3-methylbenzene (3bd).** Purified by column chromatography on silica gel (eluant: petroleum ether = 15:1). Colorless oil (70 mg, 99%). <sup>1</sup>H NMR (400 MHz, CDCl<sub>3</sub>) δ 7.28 (t, *J* = 7.7 Hz, 1H), 7.19 (d, *J* = 7.5 Hz, 3H), 2.38 (s, 3H). <sup>13</sup>C NMR (101 MHz, CDCl<sub>3</sub>) δ 139.6, 138.4, 136.2, 130.3, 129.3, 128.5, 125.9, 51.6, 21.4. HRMS (EI-TOF) Calculated for C<sub>9</sub>H<sub>7</sub>BrClI (M<sup>+</sup>) 355.8464, found 355.8466.

**(E)-6-bromo-5-chloro-6-iodohex-5-enenitrile (3be).** Purified by column chromatography on silica gel (eluant: petroleum ether/ethyl acetate = 20:1). Colorless oil (54 mg, 81%). <sup>1</sup>H NMR (400 MHz, CDCl<sub>3</sub>) δ 2.83 (t, *J* = 7.4 Hz, 2H), 2.42 (t, *J* = 7.1 Hz, 2H), 2.02 (p, *J* = 7.1 Hz, 2H). <sup>13</sup>C NMR (101 MHz, CDCl<sub>3</sub>) δ 136.4, 118.7, 51.3, 40.6, 23.2, 16.2. HRMS (ESI-ORBITRAP) Calculated for C<sub>6</sub>H<sub>7</sub>BrClIN (M+H)<sup>+</sup> 333.8489, found 333.8490.

**(E)-1-bromo-2-chloro-1-iodooct-1-ene (3bf).** Purified by column chromatography on silica gel (eluant: petroleum ether = 20:1). Colorless oil (60 mg, 86%). <sup>1</sup>H NMR (400 MHz, CDCl<sub>3</sub>) δ 2.68 – 2.60 (m, 2H), 1.66 – 1.57 (m, 2H), 1.40 – 1.27 (m, 6H), 0.90 (t, *J* = 6.7 Hz, 3H). <sup>13</sup>C NMR (101 MHz, CDCl<sub>3</sub>) δ 139.4, 48.6, 41.9, 31.5, 28.2, 27.1, 22.5, 14.1. HRMS (EI-TOF) Calculated for C<sub>8</sub>H<sub>13</sub>BrClI (M<sup>+</sup>) 349.8934, found 349.8936.

**(E)-1-chloro-3-(1-chloro-2-iodovinyl)benzene (3bg).** Purified by column chromatography on silica gel (eluant: petroleum ether = 9:1). Light yellow oil (24 mg, 87%). <sup>1</sup>H NMR (400 MHz, CDCl<sub>3</sub>) δ 7.51 – 7.44 (m, 2H), 7.41 – 7.35 (m, 2H), 6.79 (s, 1H). <sup>13</sup>C NMR (101 MHz, CDCl<sub>3</sub>) δ 136.0, 135.5, 133.0, 130.4, 129.0. HRMS (EI-TOF) Calculated for C<sub>8</sub>H<sub>5</sub>Cl<sub>2</sub>I (M<sup>+</sup>) 297.8813, found 297.8815.

**(E)-3-(1-chloro-2-iodovinyl)quinoline (3bh).** Purified by column chromatography on silica gel (eluant: petroleum ether = 9:1). Colorless oil (26 mg, 85%). <sup>1</sup>H NMR (400 MHz, CDCl<sub>3</sub>) δ 9.07 (d, *J* = 2.3 Hz, 1H), 8.33 (d, *J* = 2.2 Hz, 1H), 8.14 (d, *J* = 8.4 Hz, 1H), 7.87 (dd, *J* = 8.2, 1.5 Hz, 1H), 7.81 – 7.74 (m, 1H), 7.65 – 7.56 (m, 1H), 6.97 (s, 1H). <sup>13</sup>C NMR (101 MHz, CDCl<sub>3</sub>) δ 149.9, 147.8, 136.8, 131.3, 131.0, 130.8, 129.4, 128.3, 128.1, 127.4, 126.9. HRMS (EI-TOF) Calculated for C<sub>11</sub>H<sub>7</sub>ClIN (M<sup>+</sup>) 314.9312, found 314.9314.

**(E)-1-((2-chloro-1-iodoprop-1-en-1-yl)sulfonyl)-4-methylbenzene (3bi).** Purified by column chromatography on silica gel (eluant: petroleum ether = 9:1). Brown solid (33 mg, 86%). <sup>1</sup>H NMR (400 MHz, CDCl<sub>3</sub>) δ 7.89 (d, J = 8.4 Hz, 2H), 7.34 (d, J = 8.4 Hz, 2H), 2.57 (s, 3H), 2.45 (s, 3H), 1.25 (s, 2H). <sup>13</sup>C NMR (101 MHz, CDCl<sub>3</sub>) δ 145.0, 143.2, 136.1, 129.6, 128.8, 99.2, 34.9, 21.7. HRMS (ESI- ORBITRAP) Calculated for C<sub>10</sub>H<sub>10</sub>ClIO<sub>2</sub>S (M+H)<sup>+</sup> 356.9207, found 356.9212.

**(S,E)-4-chloro-2-(3-((S)-1,5-diethoxy-1,5-dioxopentan-2-yl)ureido)-5-iodopent-4-enoic acid (3bj).** Purified by column chromatography on silica gel (eluant: petroleum ether = 5:5). Light yellow solid (31 mg, 42%). <sup>1</sup>H NMR (400 MHz, CDCl<sub>3</sub>) δ 5.75 (s, 1H), 4.40 (dd, J = 8.0, 4.9 Hz, 1H), 4.24 – 4.05 (m, 7H), 2.87 – 2.71 (m, 2H), 2.52 – 2.32 (m, 2H), 2.22 (dddd, J = 13.4, 8.4, 6.9, 4.9 Hz, 1H), 1.97 (dtd, J = 14.4, 8.3, 6.3 Hz, 1H), 1.30 – 1.22 (m, 9H). <sup>13</sup>C NMR (101 MHz, CDCl<sub>3</sub>) δ 172.9, 172.3, 171.7, 150.1, 149.6, 61.5, 61.3, 60.6, 57.8, 54.1, 53.4, 30.2, 29.6, 28.6, 27.5, 14.2 (d, J = 7.5 Hz). HRMS (ESI-ORBITRAP) Calculated for C<sub>17</sub>H<sub>26</sub>IN<sub>2</sub>O<sub>7</sub> (M-Cl)<sup>+</sup> 497.07792, found 497.07784.

**(8R,9S,13S,14S,17S)-17-((E)-1-chloro-2-iodovinyl)-13-methyl-7,8,9,11,12,13,14,15,16,17-decahydro-6H-cyclopenta[a]phenanthrene-3,17-diol (3bk).** Purified by column chromatography on silica gel (eluant: petroleum ether = 8:2). White solid (29 mg, 49%). <sup>1</sup>H NMR (400 MHz, CDCl<sub>3</sub>) δ 7.55 – 7.50 (m, 1H), 7.26 (s, 1H), 6.72 (s, 1H), 5.10 (s, 1H), 2.79 (dd, J = 8.7, 4.3 Hz, 2H), 2.61 (s, 1H), 2.40 – 2.22 (m, 2H), 2.19 (td, J = 10.9, 4.3 Hz, 1H), 2.09 – 1.97 (m, 1H), 1.96 – 1.63 (m, 4H), 1.56 – 1.22 (m, 4H), 0.88 (s, 3H). <sup>13</sup>C NMR (101 MHz, CDCl<sub>3</sub>) δ 152.5, 139.3, 135.1, 135.0, 114.9, 87.4, 82.4, 79.8, 74.1, 49.4, 47.0, 43.2, 39.1, 38.9, 32.6, 29.2, 27.0, 26.3, 22.8, 12.6. HRMS (ESI-ORBITRAP) Calculated for C<sub>20</sub>H<sub>25</sub>ClIO<sub>2</sub> (M+H)<sup>+</sup> 459.0582, found 459.0590.

**methyl (S,E)-2-((tert-butoxycarbonyl)amino)-3-(4-(1-chloro-2-iodovinyl)phenyl)propanoate (3bl).** Purified by column chromatography on silica gel (eluant: petroleum ether = 8:2). Light yellow solid (33 mg, 55%). <sup>1</sup>H NMR (400 MHz, CDCl<sub>3</sub>) δ 7.51 – 7.44 (m, 2H), 7.18 (d, J = 7.9 Hz, 2H), 6.75 (s, 1H), 5.02 (d, J = 8.4 Hz, 1H), 4.62 (q, J = 6.9 Hz, 1H), 3.72 (s, 3H), 3.15 (dd, J = 13.7, 5.8 Hz, 1H), 3.06 (dd, J = 13.9, 6.4 Hz, 1H), 1.42 (s, 9H). <sup>13</sup>C NMR (101 MHz, CDCl<sub>3</sub>) δ 172.1, 154.8, 137.8, 136.2, 133.8, 129.2, 129.2, 80.1, 72.8, 54.2, 52.3, 38.3, 28.3. HRMS (ESI-ORBITRAP) Calculated for C<sub>17</sub>H<sub>21</sub>ClINO<sub>4</sub> (M+H)<sup>+</sup> 466.0277, found 466.0279.

**(*S,E*)-N-(2-chloro-3-(trifluoromethyl)benzyl)-1-(2-chloro-3-iodoallyl)-5-oxopyrrolidine-2-carboxamide (3bm).** Purified by column chromatography on silica gel (eluant: petroleum ether = 8:2). Light yellow solid (68 mg, 95%). <sup>1</sup>H NMR (400 MHz, CDCl<sub>3</sub>) δ 7.66 (t, *J* = 7.9 Hz, 2H), 7.35 (t, *J* = 7.8 Hz, 1H), 7.11 (d, *J* = 1.2 Hz, 1H), 6.66 (t, *J* = 6.1 Hz, 1H), 4.66 – 4.61 (m, 2H), 4.61 – 4.57 (m, 1H), 4.04 – 3.90 (m, 2H), 2.63 – 2.49 (m, 1H), 2.52 – 2.32 (m, 2H), 2.08 (dtd, *J* = 11.7, 9.6, 8.5, 6.0 Hz, 1H). <sup>13</sup>C NMR (101 MHz, CDCl<sub>3</sub>) δ 175.7, 170.9, 137.5, 134.5, 132.0, 129.1 (q, *J* = 31.2 Hz), 127.2 (q, *J* = 1.4 Hz), 127.0, 122.7 (q, *J* = 274.5 Hz), 97.5, 83.7, 59.8, 52.6, 41.9, 29.4, 23.7. HRMS (ESI-ORBITRAP) Calculated for C<sub>16</sub>H<sub>15</sub>Cl<sub>2</sub>F<sub>3</sub>IN<sub>2</sub>O<sub>2</sub> (M+H)<sup>+</sup> 520.9502, found 520.9508.

**(*E*)-(1-bromo-2-iodoprop-1-en-1-yl)benzene (4a).**<sup>7</sup> Purified by column chromatography on silica gel (eluant: petroleum ether = 20:1). Colorless oil (63 mg, 99%). <sup>1</sup>H NMR (400 MHz, CDCl<sub>3</sub>) δ 7.39 – 7.36 (m, 1H), 7.36 – 7.29 (m, 4H), 2.75 (s, 3H). <sup>13</sup>C NMR (101 MHz, CDCl<sub>3</sub>) δ 143.8, 129.1, 128.7, 128.4, 118.3, 93.1, 34.5.

**(*E*)-(1-bromo-2-iodopent-1-en-1-yl)benzene (4b).** Purified by column chromatography on silica gel (eluant: petroleum ether = 8:1). Colorless oil (64 mg, 91%). <sup>1</sup>H NMR (400 MHz, CDCl<sub>3</sub>) δ 7.41 – 7.26 (m, 5H), 2.87 – 2.80 (m, 2H), 1.75 – 1.65 (m, 2H), 1.04 (t, *J* = 7.4 Hz, 3H). <sup>13</sup>C NMR (101 MHz, CDCl<sub>3</sub>) δ 144.1, 129.1, 128.6, 128.4, 117.6, 102.2, 46.8, 21.8, 12.9. HRMS (EI-TOF) Calculated for C<sub>11</sub>H<sub>12</sub>BrI (M<sup>+</sup>) 349.9167, found 349.9166.

**(*E*)-2-(1-bromo-2-iodovinyl)benzofuran (4c).** Purified by column chromatography on silica gel (eluant: petroleum ether = 15:1). Colorless oil (60 mg, 87%). <sup>1</sup>H NMR (400 MHz, CDCl<sub>3</sub>) δ 7.54 (d, *J* = 7.8 Hz, 1H), 7.45 (d, *J* = 8.3 Hz, 1H), 7.32 – 7.27 (m, 2H), 7.20 (d, *J* = 7.6 Hz, 1H), 7.10 (s, 1H). <sup>13</sup>C NMR (101 MHz, CDCl<sub>3</sub>) δ 154.7, 150.8, 127.6, 126.2, 123.5, 121.8, 111.69, 111.3, 110.9, 74.1. HRMS (EI-TOF) Calculated for C<sub>10</sub>H<sub>6</sub>BrIO (M<sup>+</sup>) 347.8647, found 347.8641.

**(*E*)-1-bromo-4-(1,2-diiodovinyl)benzene (4d).**<sup>12</sup> Purified by column chromatography on silica gel (eluant: petroleum ether = 20:1). Colorless oil (68 mg, 79%). <sup>1</sup>H NMR (400 MHz, CDCl<sub>3</sub>) δ 7.54 (d, *J* = 8.4 Hz, 2H), 7.41 (d, *J* = 8.4 Hz, 2H), 6.79 (s, 1H). <sup>13</sup>C NMR (101 MHz, CDCl<sub>3</sub>) δ 136.5, 133.0, 131.6, 130.6, 123.8, 73.7.

**(*E*)- (1, 2-diiodobut-1-en-1-yl)benzene (4e).**<sup>12</sup> Purified by column chromatography on silica gel (eluant: petroleum ether = 15:1). Colorless oil (53 mg, 74%). <sup>1</sup>H NMR (400 MHz, CDCl<sub>3</sub>) δ 7.36 - 7.33 (m, 6H). <sup>13</sup>C NMR (151 MHz, CDCl<sub>3</sub>) δ 143.1, 128.9, 128.5, 128.5, 96.2, 80.8.

**(E)-(1, 2-dibromovinyl)benzene (4f).**<sup>13</sup> Purified by column chromatography on silica gel (eluant: petroleum ether = 15:1). Colorless oil (42 mg, 81%). <sup>1</sup>H NMR (400 MHz, CDCl<sub>3</sub>) δ 7.52 (d, *J* = 7.6 Hz, 2H), 7.43 - 7.35 (m, 3H), 6.81 (s, 1H). <sup>13</sup>C NMR (101 MHz, CDCl<sub>3</sub>) δ 137.1, 129.4, 129.2, 128.3, 121.3, 103.0.

**(E)-2-(1-bromo-2-iodovinyl)benzofuran (4h).** Purified by column chromatography on silica gel (eluant: petroleum ether = 15:1). Colorless oil (28 mg, 58%). <sup>1</sup>H NMR (400 MHz, CDCl<sub>3</sub>) δ 7.42 – 7.34 (m, 3H), 7.32 (d, *J* = 6.4 Hz, 2H), -0.05 (s, 9H). <sup>13</sup>C NMR (151 MHz, CDCl<sub>3</sub>) δ 139.5, 138.6, 134.7, 129.5, 129.4, 128.4, -0.65. HRMS (EI-TOF) Calculated for C<sub>11</sub>H<sub>14</sub>Cl<sub>2</sub>Si (M<sup>+</sup>) 244.0242, found 244.0241.

**(E)-(2-iodo-1-thiocyanatovinyl)benzene (4i).**<sup>14</sup> Purified by column chromatography on silica gel (eluant: petroleum ether/ethyl acetate = 30:1). Colorless oil (37 mg, 66%). <sup>1</sup>H NMR (600 MHz, CDCl<sub>3</sub>) δ 7.52 – 7.44 (m, 5H), 7.28 (s, 1H). <sup>13</sup>C NMR (101 MHz, CDCl<sub>3</sub>) δ 135.9, 130.9, 130.3, 129.1, 129.0, 109.3, 81.3.

**(E)-2-iodo-1-phenylvinyl acetate (4j).**<sup>15</sup> Purified by column chromatography on silica gel (eluant: petroleum ether/ethyl acetate = 50:1). Colorless oil (24 mg, 43%). <sup>1</sup>H NMR (400 MHz, CDCl<sub>3</sub>) δ 7.61 - 7.59 (m, 2H), 7.39 - 7.26 (m, 3H), 6.34 (s, 1H), 2.15 (s, 3H). <sup>13</sup>C NMR (101 MHz, CDCl<sub>3</sub>) δ 168.5, 151.2, 134.5, 129.5, 128.9, 128.2, 67.1, 20.8.

**1-(1-chloro-2-iodoethyl)-4-fluorobenzene (5a).** Purified by column chromatography on silica gel (eluant: petroleum ether = 20:1). Colorless oil (49 mg, 85%). <sup>1</sup>H NMR (400 MHz, CDCl<sub>3</sub>) δ 7.41 – 7.33 (m, 2H), 7.08 (t, *J* = 8.6 Hz, 2H), 5.06 (dd, *J* = 10.0, 5.5 Hz, 1H), 3.84 – 3.65 (m, 2H). <sup>13</sup>C NMR (151 MHz, CDCl<sub>3</sub>) δ 162.9 (d, *J* = 249.1 Hz), 135.0 (d, *J* = 3.3 Hz), 129.1 (d, *J* = 8.4 Hz), 115.8 (d, *J* = 22.6 Hz), 60.7, 9.9. HRMS (EI-TOF) Calculated for C<sub>8</sub>H<sub>7</sub>ClFI (M<sup>+</sup>) 283.9365, found 283.9361.

**1-bromo-4-(1-chloro-2-iodoethyl)benzene (5b).** Purified by column chromatography on silica gel (eluant: petroleum ether = 20:1). Colorless oil (59 mg, 87%). <sup>1</sup>H NMR (400 MHz, CDCl<sub>3</sub>) δ 7.52 (d, *J* = 8.5 Hz, 2H), 7.26 (d, *J* = 8.5 Hz, 2H), 5.02 (dd, *J* = 10.0, 5.4 Hz, 1H), 3.84 – 3.63 (m, 2H). <sup>13</sup>C NMR (151 MHz, CDCl<sub>3</sub>) δ 138.1, 132.0, 128.9, 123.2, 60.6, 9.5. HRMS (EI-TOF) Calculated for C<sub>8</sub>H<sub>7</sub>BrClI (M<sup>+</sup>) 343.8464, found 343.8469.

**4-(1-chloro-2-iodoethyl)phenyl acetate (5c).** Purified by column chromatography on silica gel (eluant: petroleum ether/ethyl acetate = 50:1). Colorless oil (45 mg, 70%). <sup>1</sup>H NMR (600 MHz, CDCl<sub>3</sub>) δ 7.44 (d, *J* = 8.4 Hz, 2H), 7.14 (d, *J* = 8.4 Hz, 2H), 5.17 - 5.15 (m, 1H), 4.13 – 3.98 (m, 2H), 2.33 (s, 3H). <sup>13</sup>C NMR (151

MHz, CDCl<sub>3</sub>) δ 169.1, 151.0, 136.1, 128.9, 121.9, 50.1, 35.0, 21.2. HRMS (EI-TOF) Calculated for C<sub>10</sub>H<sub>10</sub>ClIO<sub>2</sub> (M<sup>+</sup>) 323.9414, found 323.9411.

**4-(1-chloro-2-iodoethyl)-1,1'-biphenyl (5d).** Purified by column chromatography on silica gel (eluant: petroleum ether = 15:1). Colorless oil (52 mg, 76%). <sup>1</sup>H NMR (400 MHz, CDCl<sub>3</sub>) δ 7.64 – 7.58 (m, 4H), 7.47 – 7.44 (m, 4H), 7.40 – 7.35 (m, 1H), 5.13 (dd, *J* = 9.6, 5.8 Hz, 1H), 3.88 – 3.75 (m, 2H). <sup>13</sup>C NMR (151 MHz, CDCl<sub>3</sub>) δ 142.1, 140.3, 137.9, 128.8, 127.7, 127.7, 127.5, 127.2, 61.5, 9.8. HRMS (EI-TOF) Calculated for C<sub>14</sub>H<sub>12</sub>ClI (M<sup>+</sup>) 341.9672, found 341.9677.

**1-(1-chloro-2-iodoethyl)-4-methylbenzene (5e).** Purified by column chromatography on silica gel (eluant: petroleum ether = 50:1). Colorless oil (45 mg, 88%). <sup>1</sup>H NMR (400 MHz, CDCl<sub>3</sub>) δ 7.27 (d, *J* = 7.9 Hz, 2H), 7.20 (d, *J* = 8.1 Hz, 2H), 5.06 (dd, *J* = 9.7, 5.7 Hz, 1H), 3.84 – 3.69 (m, 2H), 2.37 (s, 3H). <sup>13</sup>C NMR (151 MHz, CDCl<sub>3</sub>) δ 139.2, 136.2, 129.5, 127.1, 61.6, 21.3, 10.1. HRMS (EI-TOF) Calculated for C<sub>9</sub>H<sub>10</sub>ClI (M<sup>+</sup>) 279.9516, found 279.9518.

**1-(1-chloro-2-iodoethyl)-4-(trifluoromethyl)benzene (5f).** Purified by column chromatography on silica gel (eluant: petroleum ether = 50:1). Colorless oil (44 mg, 66%). <sup>1</sup>H NMR (600 MHz, CDCl<sub>3</sub>) δ 7.70 (d, *J* = 8.2 Hz, 2H), 7.55 (d, *J* = 8.1 Hz, 2H), 5.14 – 5.12 (m, 1H), 3.91 – 3.67 (m, 2H). <sup>19</sup>F NMR (565 MHz, CDCl<sub>3</sub>) δ -62.64 (s). <sup>13</sup>C NMR (151 MHz, CDCl<sub>3</sub>) δ 142.9, 131.2 (q, *J* = 33.2 Hz), 127.8, 126.5, 125.8 (q, *J* = 3.7 Hz), 123.8 (q, *J* = 271.8 Hz), 60.3, 9.1. HRMS (EI-TOF) Calculated for C<sub>9</sub>H<sub>7</sub>ClF<sub>3</sub>I (M<sup>+</sup>) 333.9233, found 333.9228.

**1-(1-chloro-2-iodoethyl)-4-nitrobenzene (5g).** Purified by column chromatography on silica gel (eluant: petroleum ether/ethyl acetate = 15:1). Colorless oil (38 mg, 61%). <sup>1</sup>H NMR (600 MHz, CDCl<sub>3</sub>) δ 8.28 (d, *J* = 8.6 Hz, 2H), 7.60 (d, *J* = 8.7 Hz, 2H), 5.16 – 5.13 (m, 1H), 3.87 – 3.67 (m, 2H). <sup>13</sup>C NMR (151 MHz, CDCl<sub>3</sub>) δ 148.2, 145.9, 128.5, 124.1, 59.5, 8.5. HRMS (EI-TOF) Calculated for C<sub>8</sub>H<sub>7</sub>ClINO<sub>2</sub> (M<sup>+</sup>) 310.9210, found 310.9218.

**Methyl-4-(1-chloro-2-iodoethyl)benzoate (5h).** Purified by column chromatography on silica gel (eluant: petroleum ether/ethyl acetate = 30:1). Colorless oil (47 mg, 73%). <sup>1</sup>H NMR (600 MHz, CDCl<sub>3</sub>) δ 8.08 (d, *J* = 8.2 Hz, 2H), 7.48 (d, *J* = 8.2 Hz, 2H), 5.12 - 5.10 (m, 1H), 3.95 (s, 3H), 3.95 - 3.71 (m, 2H). <sup>13</sup>C NMR (151 MHz, CDCl<sub>3</sub>) δ 166.4, 143.8, 130.8, 130.1, 127.4, 60.6, 52.3, 9.1. HRMS (EI-TOF) Calculated for C<sub>10</sub>H<sub>10</sub>ClIO<sub>2</sub> (M<sup>+</sup>) 323.9414, found 323.9218.

**1-bromo-2-(1-chloro-2-iodoethyl)benzene (5i).** Purified by column chromatography on silica gel (eluant: petroleum ether = 15:1). Colorless oil (53 mg, 77%). <sup>1</sup>H NMR (400 MHz, CDCl<sub>3</sub>) δ 7.59 – 7.53 (m, 2H), 7.41 – 7.37 (m, 1H), 7.25 – 7.19 (m, 1H), 5.60 (dd, *J* = 8.4, 6.6 Hz, 1H), 3.82 – 3.71 (m, 2H). <sup>13</sup>C NMR (151 MHz, CDCl<sub>3</sub>) δ 138.3, 133.1, 130.5, 128.2, 128.2, 123.8, 59.5, 8.5. HRMS (EI-TOF) Calculated for C<sub>8</sub>H<sub>7</sub>BrClI (M<sup>+</sup>) 343.8464, found 343.8469.

**1-bromo-3-(1-chloro-2-iodoethyl)benzene (5j).** Purified by column chromatography on silica gel (eluant: petroleum ether = 20:1). Colorless oil (56 mg, 87%). <sup>1</sup>H NMR (400 MHz, CDCl<sub>3</sub>) δ 7.57 – 7.46 (m, 2H), 7.34 – 7.23 (m, 2H), 5.00 (dd, *J* = 9.8, 5.6 Hz, 1H), 3.81 – 3.63 (m, 2H). <sup>13</sup>C NMR (151 MHz, CDCl<sub>3</sub>) δ 141.3, 132.3, 130.4, 130.3, 125.9, 122.7, 60.5, 9.4. HRMS (EI-TOF) Calculated for C<sub>8</sub>H<sub>7</sub>BrClI (M<sup>+</sup>) 343.8464, found 343.8469.

**2-(1-chloro-2-iodoethyl)naphthalene (5k).** Purified by column chromatography on silica gel (eluant: petroleum ether = 20:1). Colorless oil (45 mg, 71%). <sup>1</sup>H NMR (600 MHz, CDCl<sub>3</sub>) δ 7.90 (d, *J* = 8.6 Hz, 1H), 7.8 – 7.85 (m, 2H), 7.82 (d, *J* = 0.9 Hz, 1H), 7.54 – 7.49 (m, 3H), 5.27 – 5.24 (m, 1H), 3.92 – 3.83 (m, 2H). <sup>13</sup>C NMR (151 MHz, CDCl<sub>3</sub>) δ 136.2, 133.5, 132.9, 129.1, 128.2, 127.8, 127.2, 126.9, 126.7, 123.8, 62.0, 9.7. HRMS (EI-TOF) Calculated for C<sub>12</sub>H<sub>10</sub>ClI (M<sup>+</sup>) 315.9516, found 315.9521.

**1-chloro-2-iodocyclooctane (5l).** Purified by column chromatography on silica gel (eluant: petroleum ether = 5:1). Colorless oil (38 mg, 71%). <sup>1</sup>H NMR (600 MHz, CDCl<sub>3</sub>) δ 4.66 – 4.57 (m, 1H), 4.51 – 4.42 (m, 1H), 2.40 – 2.22 (m, 2H), 2.14 – 1.96 (m, 2H), 1.87 – 1.66 (m, 4H), 1.64 – 1.53 (m, 2H), 1.51 – 1.38 (m, 2H). <sup>13</sup>C NMR (151 MHz, CDCl<sub>3</sub>) δ 70.3, 41.9, 34.5, 33.3, 27.9, 25.6, 25.3, 25.2. HRMS (EI-TOF) Calculated for C<sub>8</sub>H<sub>14</sub>ClI (M<sup>+</sup>) 271.9829, found 271.9828.

**(4*R*, 5*R*)-4-chloro-5-iodooctane (5m).** Purified by column chromatography on silica gel (eluant: petroleum ether = 5:1). Colorless oil (38 mg, 70%). <sup>1</sup>H NMR (400 MHz, CDCl<sub>3</sub>) δ 4.35 – 4.33 (m, 1H), 3.77–3.74 (m, 1H), 2.00 – 1.85 (m, 2H), 1.82 – 1.76 (m, 2H), 1.60 – 1.57 (m, 2H), 1.46 – 1.35 (m, 2H), 1.03 – 0.86 (m, 6H). <sup>13</sup>C NMR (101 MHz, CDCl<sub>3</sub>) δ 66.4, 42.1, 38.8, 38.2, 22.8, 20.0, 13.5, 13.2. HRMS (EI-TOF) Calculated for C<sub>8</sub>H<sub>16</sub>ClI (M<sup>+</sup>) 273.9985, found 273.9991.

**4-chloro-5-iodooctane (5m').** Purified by column chromatography on silica gel (eluant: petroleum ether = 5:1). Colorless oil (34 mg, 63%). <sup>1</sup>H NMR (600 MHz, CDCl<sub>3</sub>) δ 4.27 – 4.23 (m, 1H), 3.92 – 3.89 (m, 1H), 2.06 – 1.89 (m, 2H), 1.87 – 1.77 (m, 2H), 1.69 – 1.59 (m, 2H), 1.49 – 1.36 (m, 2H), 0.95 (t, *J* = 7.4 Hz, 6H). <sup>13</sup>C NMR

(151 MHz, CDCl<sub>3</sub>)  $\delta$  66.8, 42.3, 39.8, 39.1, 22.6, 19.4, 13.5, 13.2. HRMS (EI-TOF) Calculated for C<sub>8</sub>H<sub>16</sub>ClI (M<sup>+</sup>) 273.9985, found 273.9991.

**2-(2-chloro-3-iodopropyl)isoindoline-1, 3-dione (5n).** Purified by column chromatography on silica gel (eluant: petroleum ether/ethyl acetate = 15:1). Colorless oil (58 mg, 83%). <sup>1</sup>H NMR (400 MHz, CDCl<sub>3</sub>)  $\delta$  7.89 (dd, *J* = 5.4, 3.1 Hz, 2H), 7.76 (dd, *J* = 5.4, 3.1 Hz, 2H), 4.77 - 4.70 (m, 1H), 4.17 (d, *J* = 7.3 Hz, 2H), 4.05 - 3.87 (m, 2H). <sup>13</sup>C NMR (151 MHz, CDCl<sub>3</sub>)  $\delta$  167.7, 134.4, 131.7, 123.7, 48.3, 43.9, 26.3. HRMS (EI-TOF) Calculated for C<sub>11</sub>H<sub>9</sub>ClINO<sub>2</sub> (M<sup>+</sup>) 348.9367, found 348.9371.

**2-(2-chloro-3-iodopropoxy)benzaldehyde (5o).** Purified by column chromatography on silica gel (eluant: petroleum ether/ethyl acetate = 40:1). Colorless oil (41 mg, 63%). <sup>1</sup>H NMR (400 MHz, CDCl<sub>3</sub>)  $\delta$  10.58 (s, 1H), 7.89 - 7.86 (m, 1H), 7.59 - 7.54 (m, 1H), 7.12 - 7.08 (m, 1H), 7.00 (t, *J* = 7.1 Hz, 1H), 4.59 - 4.37 (m, 3H), 4.15 - 3.67 (m, 2H). <sup>13</sup>C NMR (151 MHz, CDCl<sub>3</sub>)  $\delta$  189.4, 160.1, 136.0, 128.8, 125.2, 121.8, 112.8, 69.6, 46.2, 24.9. HRMS (EI-TOF) Calculated for C<sub>10</sub>H<sub>10</sub>ClIO<sub>2</sub> (M<sup>+</sup>) 323.9414, found 323.9420.

**4-(1-chloro-2-iodoethyl)-1, 3-dioxolan-2-one (5p).** Purified by column chromatography on silica gel (eluant: petroleum ether/ethyl acetate = 20:1). Colorless oil (37 mg, 68%). <sup>1</sup>H NMR (400 MHz, CDCl<sub>3</sub>)  $\delta$  4.76 - 4.69 (m, 1H), 4.65 (t, *J* = 8.6 Hz, 1H), 4.28 - 4.19 (m, 2H), 4.12 - 3.98 (m, 2H). <sup>13</sup>C NMR (151 MHz, CDCl<sub>3</sub>)  $\delta$  153.7, 72.9, 69.5, 45.4, 31.8. HRMS (EI-TOF) Calculated for C<sub>5</sub>H<sub>6</sub>ClIO<sub>3</sub> (M<sup>+</sup>) 275.9050, found 275.9058.

**3-chloro-3-(iodomethyl)dihydrofuran-2(3H)-one (5q).** Purified by column chromatography on silica gel (eluant: petroleum ether/ethyl acetate = 40:1). Colorless oil (36 mg, 70%). <sup>1</sup>H NMR (400 MHz, CDCl<sub>3</sub>)  $\delta$  4.45 (t, *J* = 8.8 Hz, 1H), 4.40 - 4.26 (m, 2H), 4.11 (d, *J* = 11.5 Hz, 1H), 2.87 - 2.78 (m, 1H), 2.41 (dd, *J* = 14.7, 5.3 Hz, 1H). <sup>13</sup>C NMR (151 MHz, CDCl<sub>3</sub>)  $\delta$  173.7, 65.6, 48.6, 37.3, 33.8. HRMS (EI-TOF) Calculated for C<sub>5</sub>H<sub>6</sub>ClIO<sub>2</sub> (M<sup>+</sup>) 259.9101, found 259.9105.

**2-chloro-1-iododecane (5r).** Purified by column chromatography on silica gel (eluant: petroleum ether). Colorless oil (40 mg, 66%). <sup>1</sup>H NMR (400 MHz, CDCl<sub>3</sub>)  $\delta$  4.31 - 3.69 (m, 2H), 3.58 - 3.40 (m, 1H), 2.10 - 1.90 (m, 1H), 1.81 - 1.67 (m, 1H), 1.56 - 1.19 (m, 12H), 0.89 (t, *J* = 6.8 Hz, 3H). <sup>13</sup>C NMR (151 MHz, CDCl<sub>3</sub>)  $\delta$  61.1, 50.0, 37.2, 36.4, 33.6, 31.8, 29.4, 29.4, 29.2, 29.2, 28.8, 28.7, 25.9, 22.7, 14.1, 11.1. HRMS (EI-TOF) Calculated for C<sub>10</sub>H<sub>20</sub>ClI (M<sup>+</sup>) 302.0298, found 302.0290.

**4-(1-chloro-2-iodoethyl)phenyl acetate (5s).** Purified by column chromatography on silica gel (eluant: petroleum ether/ethyl acetate = 50:1). Colorless oil (50 mg, 79%). <sup>1</sup>H NMR (600 MHz, CDCl<sub>3</sub>)  $\delta$  7.49 - 7.34



(m, 2H), 7.22 – 7.07 (m, 2H), 5.10 - 5.08 (m, 1H), 3.88 – 3.58 (m, 2H), 2.33 (s, 3H).  $^{13}\text{C}$  NMR (151 MHz,  $\text{CDCl}_3$ )  $\delta$  169.2, 151.0, 136.6, 128.4, 121.9, 61.0, 21.2, 9.9. HRMS (EI-TOF) Calculated for  $\text{C}_{10}\text{H}_{10}\text{BrIO}_2$  ( $\text{M}^+$ ) 367.8909, found 367.8913.

## 5. Radio-HPLC analysis and characterization for $^{125}\text{I}$ -labeled alkene

**3a**,  $t_R = 8.59$  min,  $\text{RCY} = 83 \pm 3\%$ ,  $n = 20$

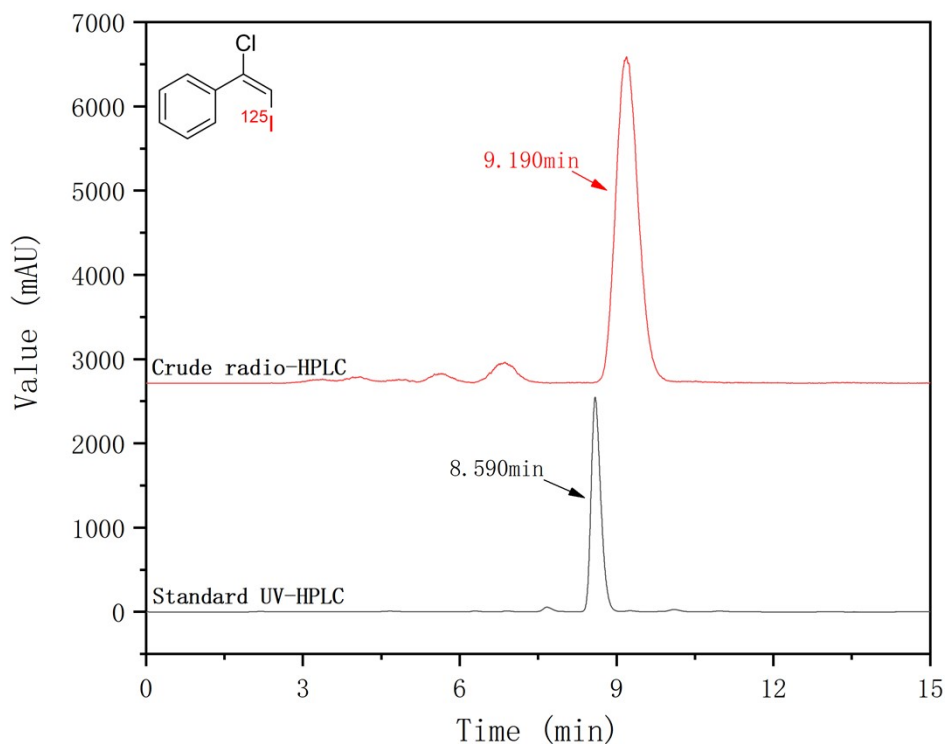

HPLC condition(SB-C18, MeCN/0.1 M ammonium formate buffer = 75/25, flow rate = 1 mL/min,  $\lambda = 254\text{nm}$ )

**3b**,  $t_R = 9.04$  min,  $\text{RCY} = 70 \pm 6\%$ ,  $n = 4$

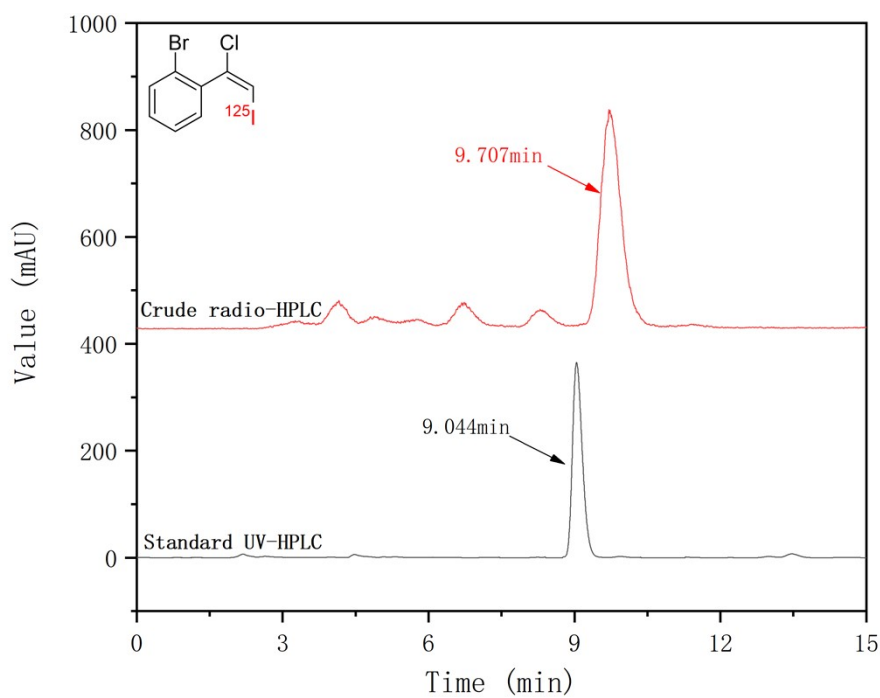

HPLC condition (SB-C18, MeCN/0.1 M ammonium formate buffer=75/25, flow rate = 1 mL/min,  $\lambda$  = 220 nm)

**3c**,  $t_R$  = 12.97 min, RCY = 76 $\pm$ 4%, n = 4

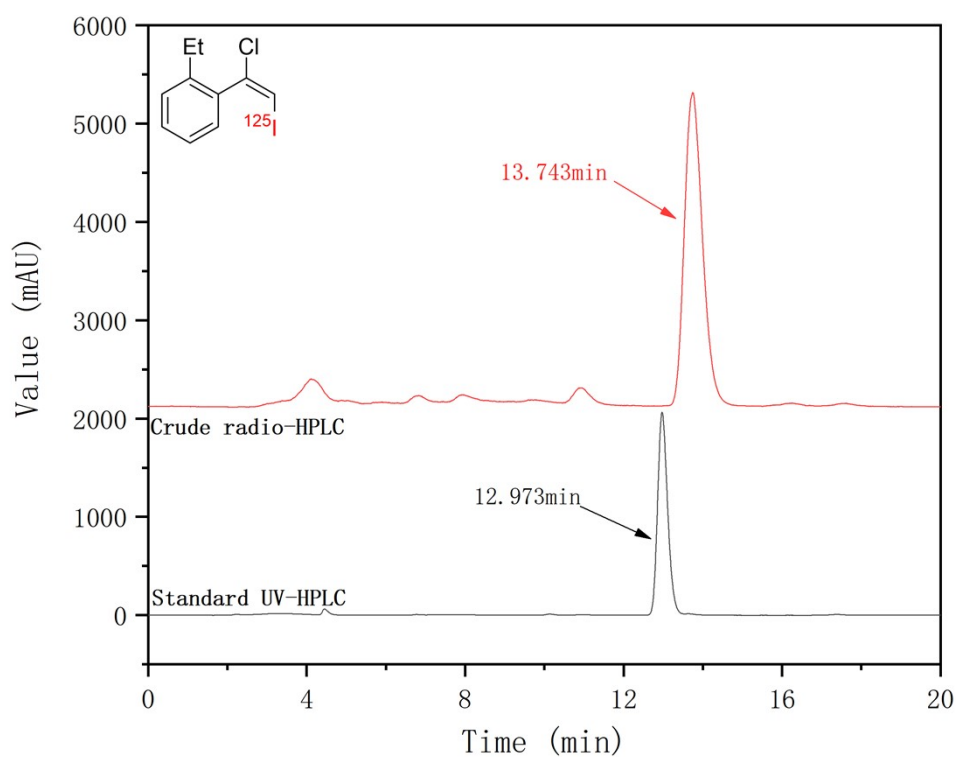

HPLC condition (SB-C18, MeCN/0.1 M ammonium formate buffer = 70/30, flow rate = 1 mL/min,  $\lambda$  = 254nm)

**3f**,  $t_R$  = 6.67 min, RCY = 82 $\pm$ 6 %, n = 4

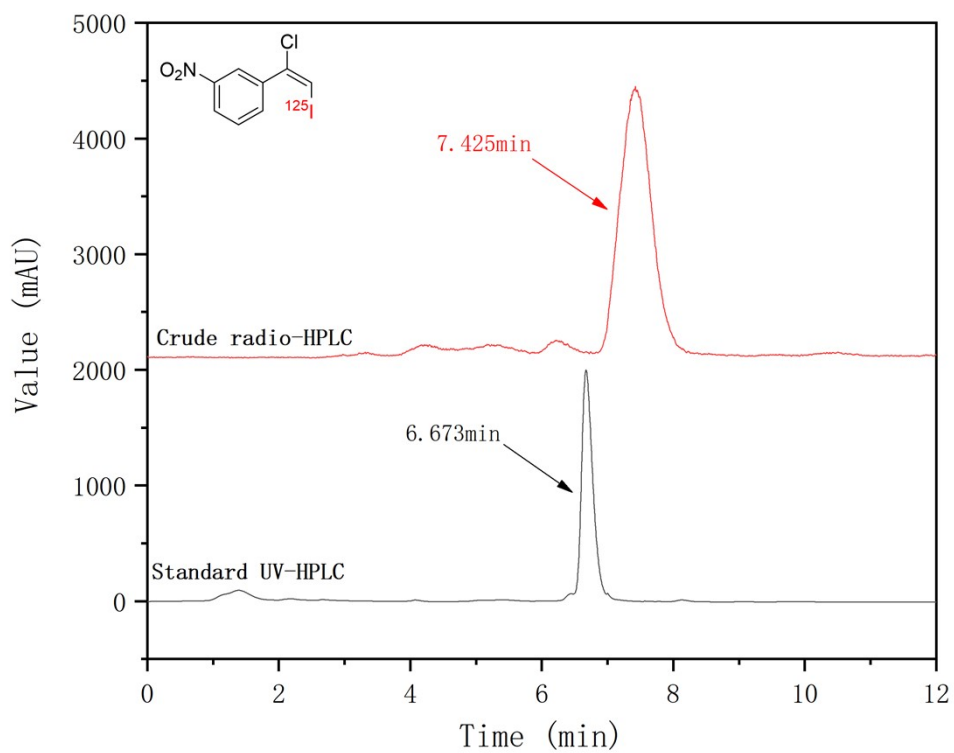

HPLC condition (SB-C18, MeCN/0.1 M ammonium formate buffer = 75/25, flow rate = 1 mL/min,  $\lambda$  = 220 nm)

**3g**, tR = 8.44 min, RCY = 69±8%, n = 4

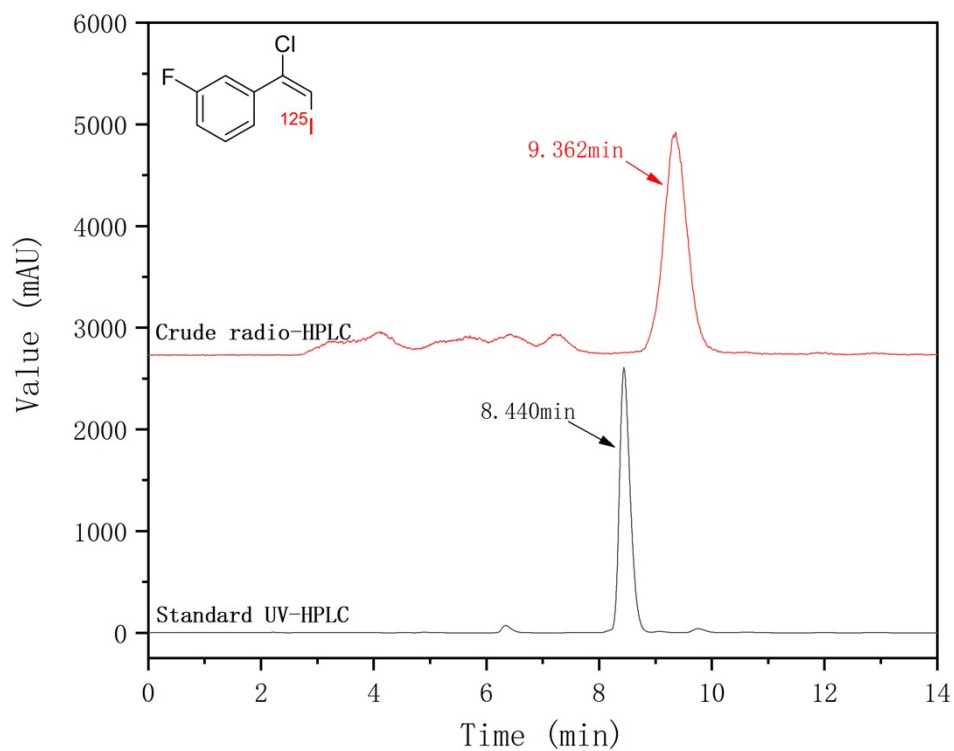

HPLC condition (SB-C18, MeCN/0.1 M ammonium formate buffer = 75/25, flow rate = 1 mL/min,  $\lambda$  = 220 nm)

**3k**, tR = 7.91 min, RCY = 40±6%, n = 4

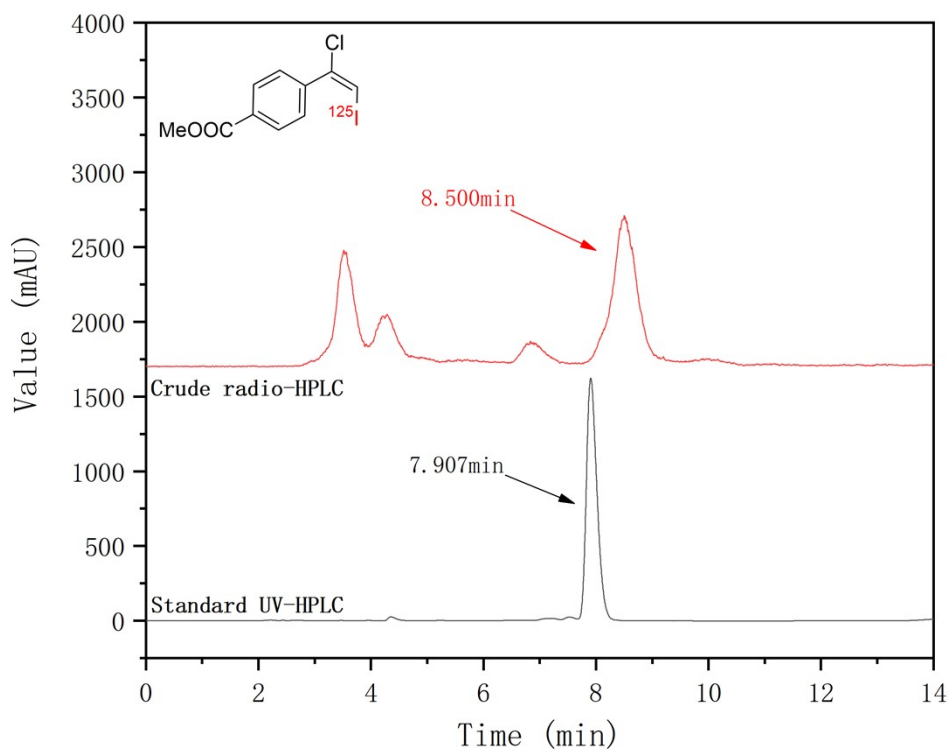

HPLC condition (SB-C18, MeCN/0.1 M ammonium formate buffer = 70/30, flow rate = 1 mL/min,  $\lambda$  = 220 nm)

**3n**, tR = 17.26 min, RCY = 82±3%, n = 4

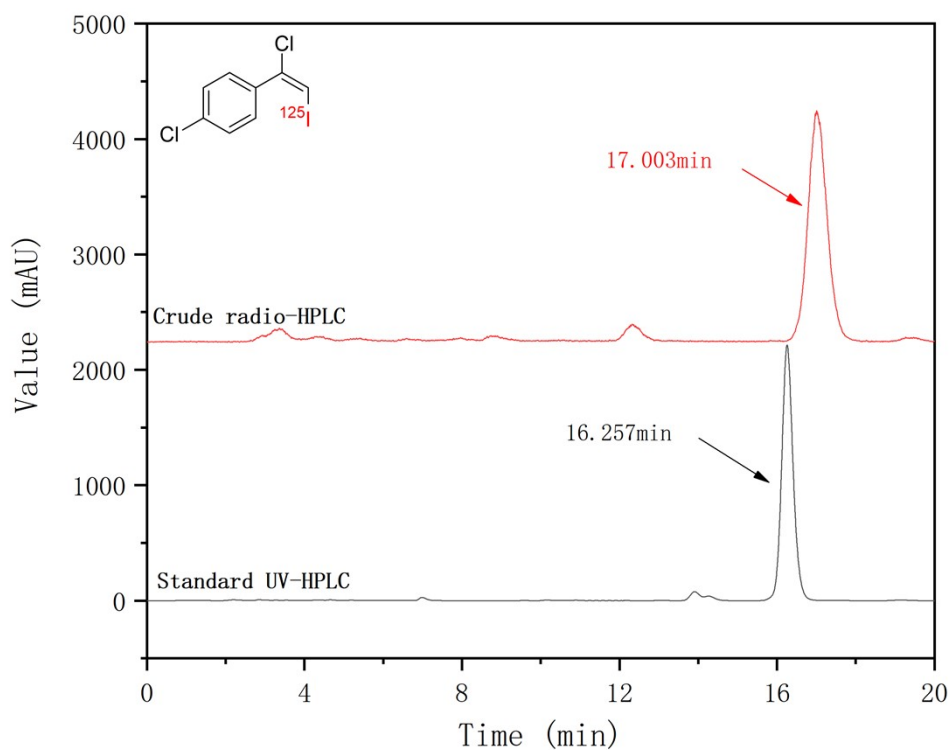

HPLC condition (SB-C18, MeCN/0.1 M ammonium formate buffer = 75/25, flow rate = 1 mL/min,  $\lambda$  = 220nm)

**3p**, tR = 23.80 min, RCY = 85±2%, n = 3

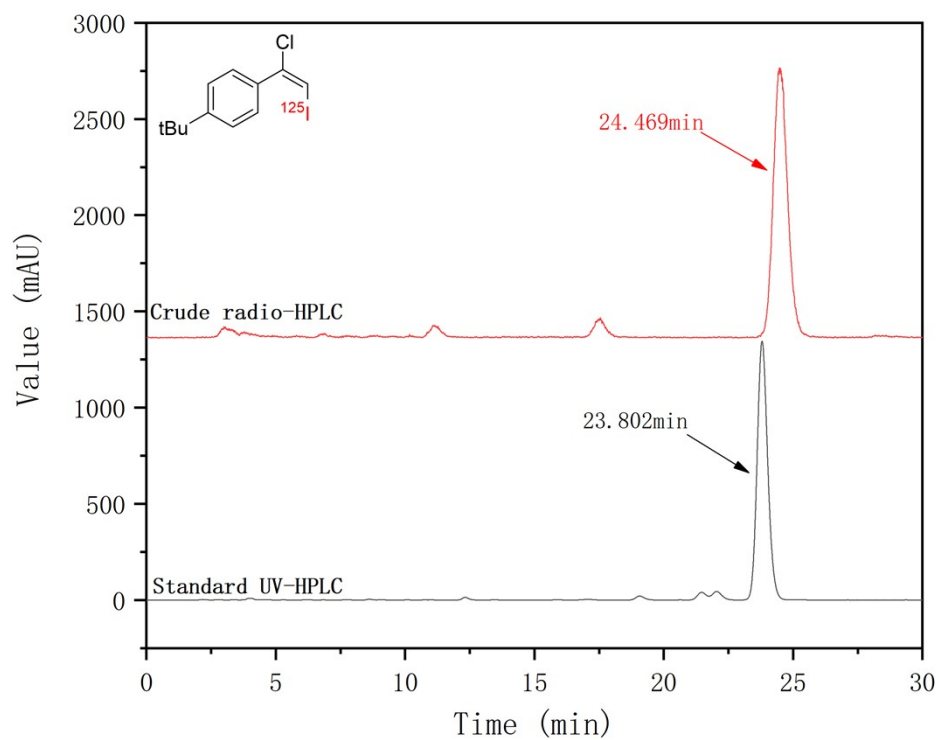

HPLC condition (SB-C18, MeCN/0.1 M ammonium formate buffer = 75/25, flow rate = 1 mL/min,  $\lambda$  = 220 nm)

**3q**, tR = 18.85 min, RCY = 60 ± 7%, n = 3

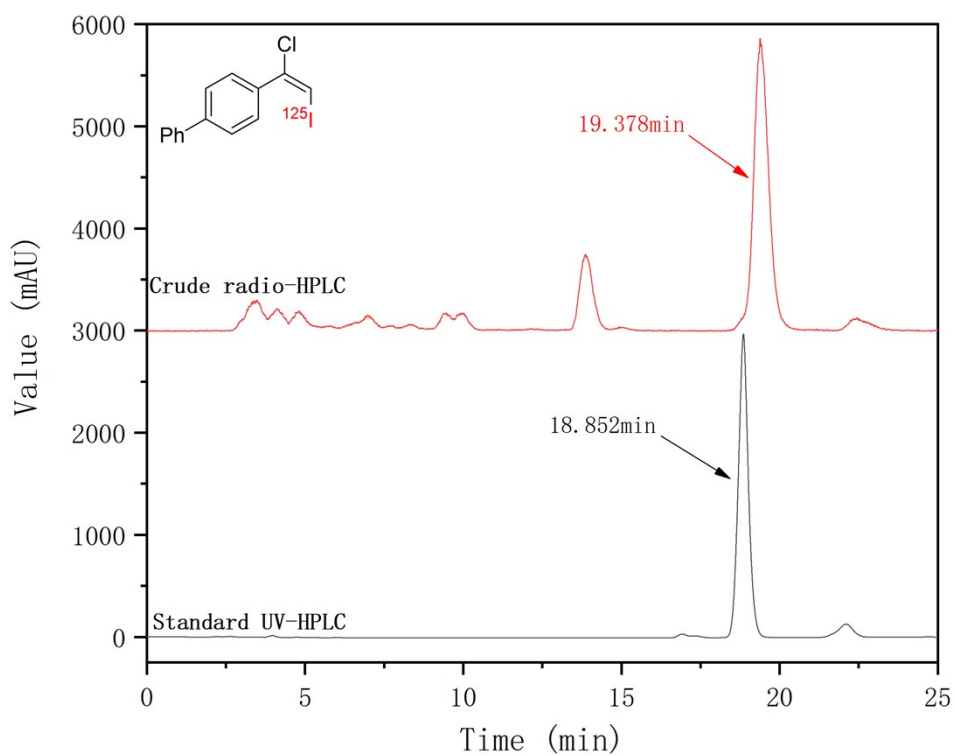

HPLC condition (SB-C18, MeCN/0.1 M ammonium formate buffer = 75/25, flow rate = 1 mL/min,  $\lambda$  = 220nm)

**3s**, tR = 14.36 min, RCY = 55 ± 4%, n = 3

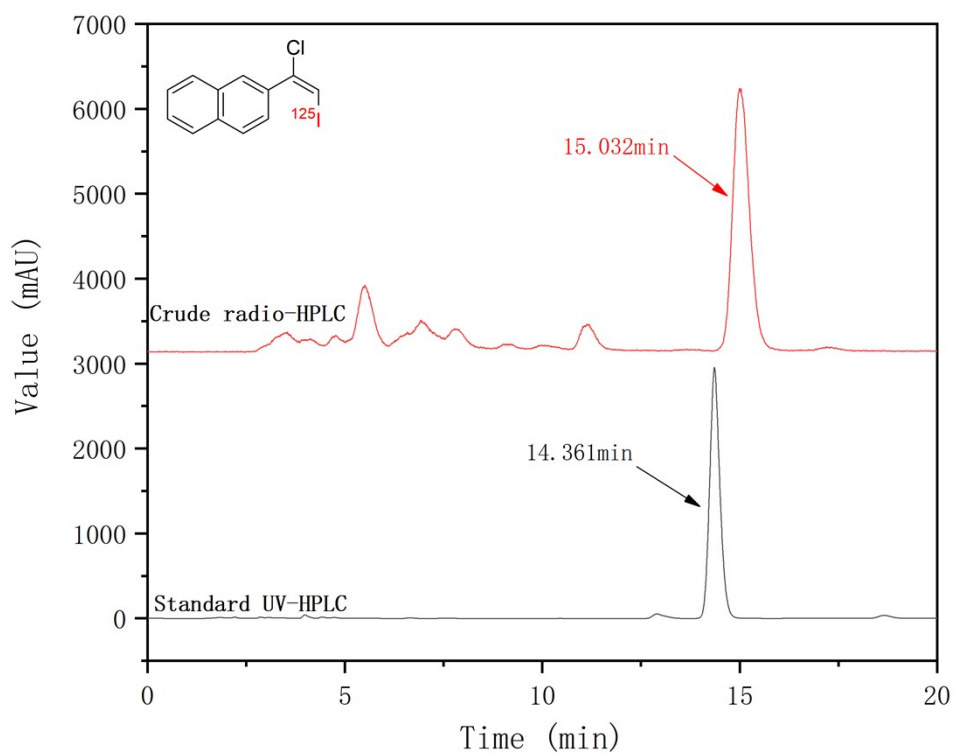

HPLC condition (SB-C18, MeCN/0.1 M ammonium formate buffer = 75/25, flow rate = 1 mL/min,  $\lambda$  = 220nm)

**3z**, tR = 9.12 min, RCY = 92 ± 2%, n = 3

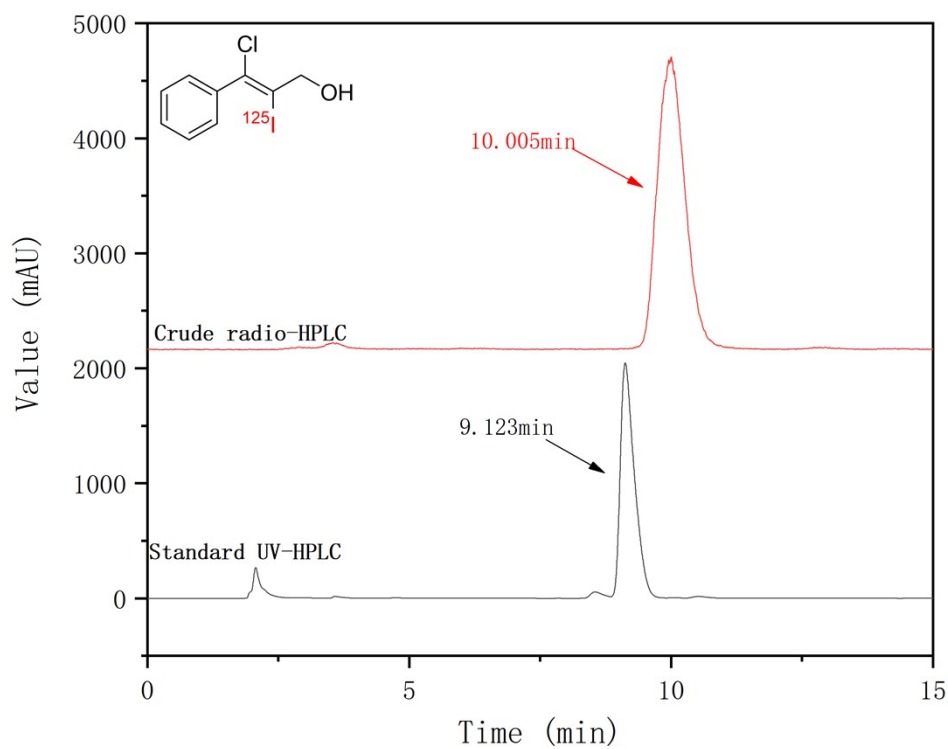

HPLC condition (SB-C18, MeCN/0.1 M ammonium formate buffer = 65/35, flow rate=1 mL/min,  $\lambda$  = 220nm)

**3ab**, tR = 8.76 min, RCY = 80 ± 2%, n = 3

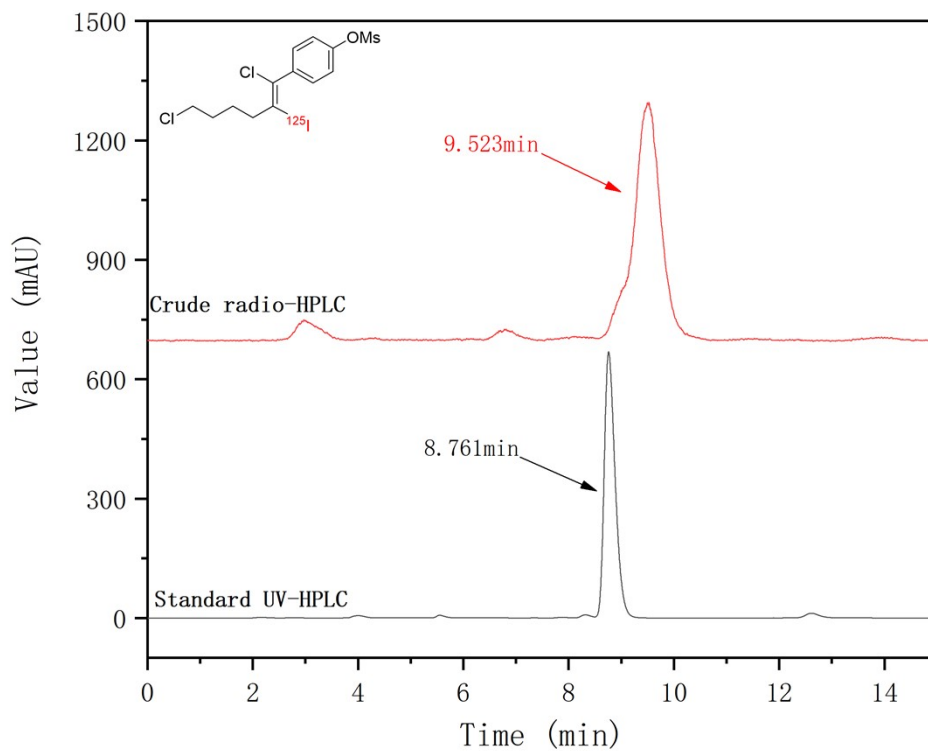

HPLC condition (SB-C18, MeCN/0.1 M ammonium formate buffer=75/25, flow rate = 1 mL/min,  $\lambda$  = 220nm)

**3ak**, tR = 8.95 min, RCY = 38 ± 8%, n = 3

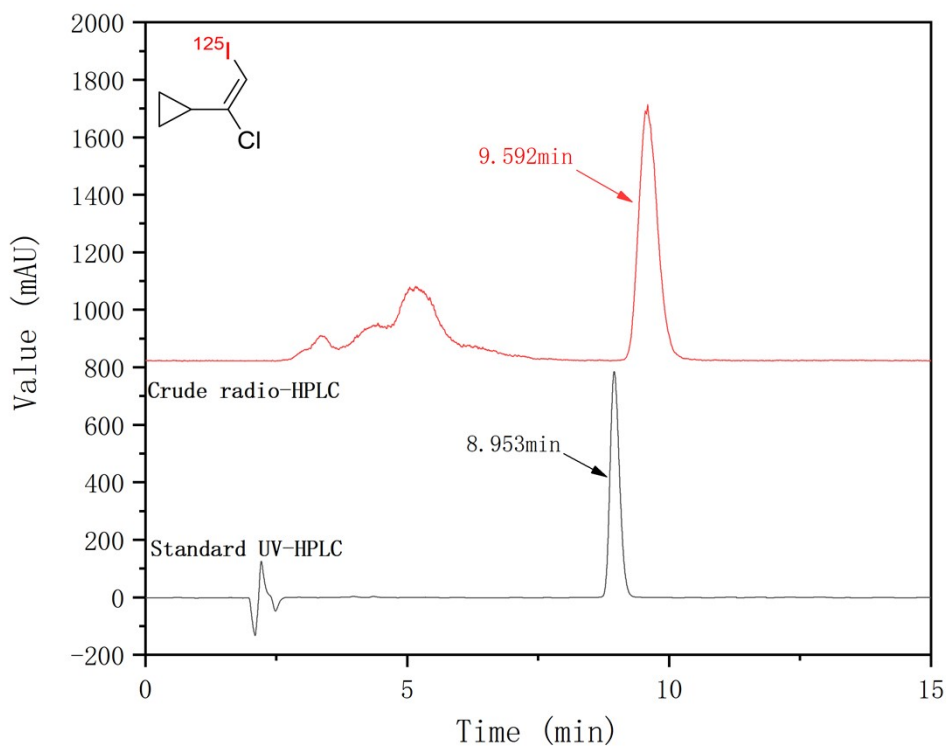



HPLC condition (SB-C18, MeCN/0.1 M ammonium formate buffer=75/25, flow rate=1 mL/min,  $\lambda$ =220nm)

**3ap**,  $t_R = 17.71\text{min}$ ,  $\text{RCY} = 70 \pm 3\%$ ,  $n = 3$

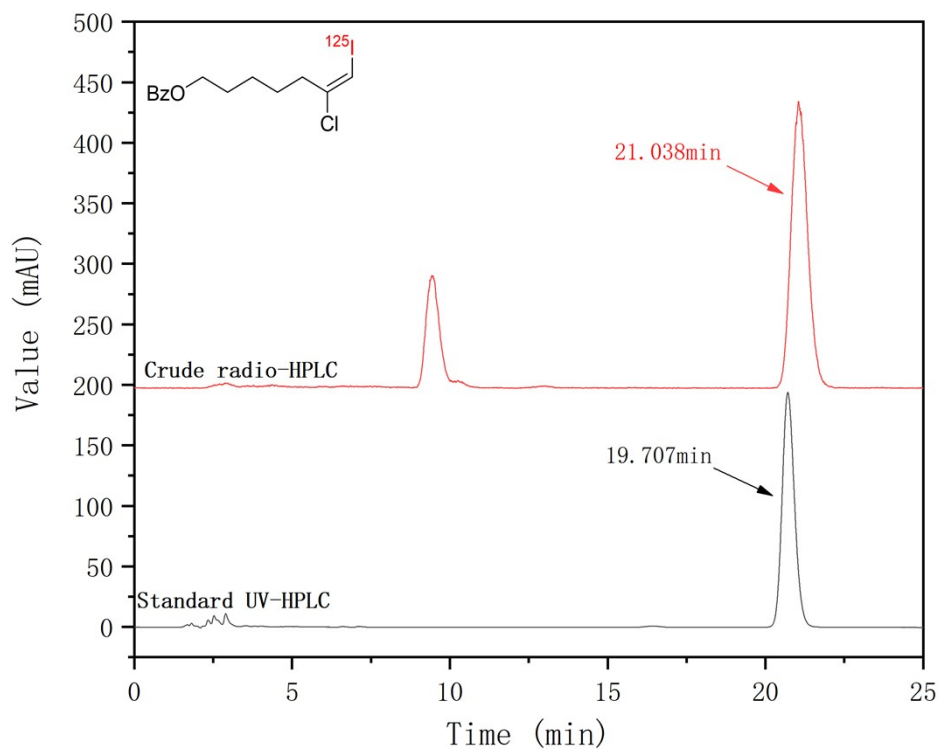

HPLC condition (SB-C18, MeCN/0.1 M ammonium formate buffer = 75/25, flow rate=1 mL/min,  $\lambda$ = 220 nm)

**3aq**,  $t_R = 8.97\text{ min}$ ,  $\text{RCY} = 51 \pm 5\%$ ,  $n = 3$

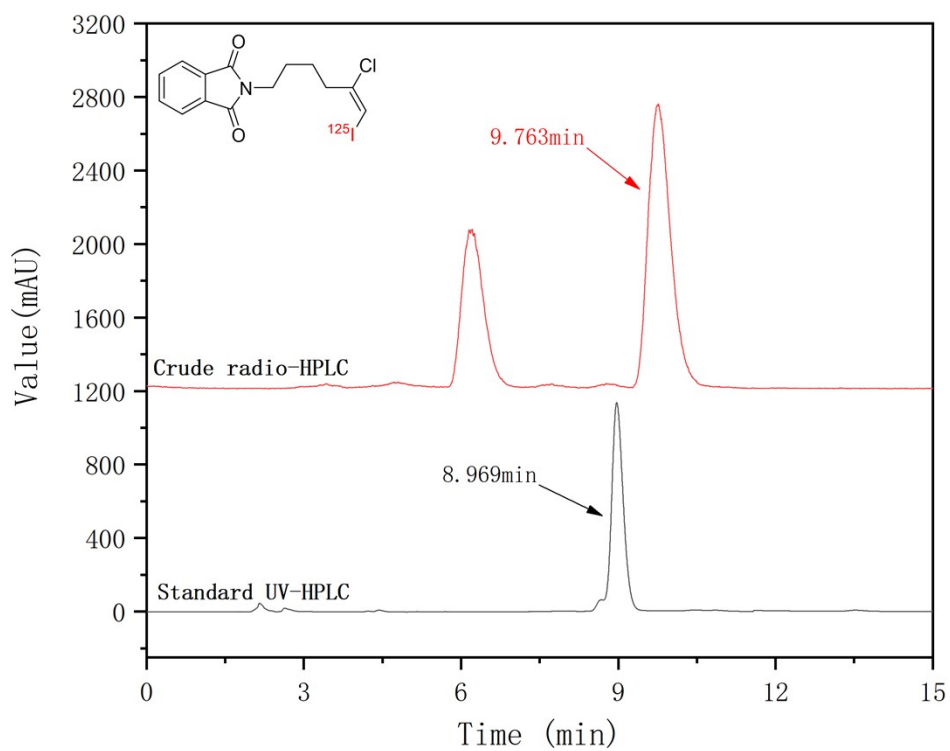

HPLC condition (SB-C18, MeCN/0.1 M ammonium formate buffer=75/25, flow rate=1 mL/min,  $\lambda$ =220nm)

**3bg**, tR = 12.02 min, RCY =  $80 \pm 3\%$ , n = 3

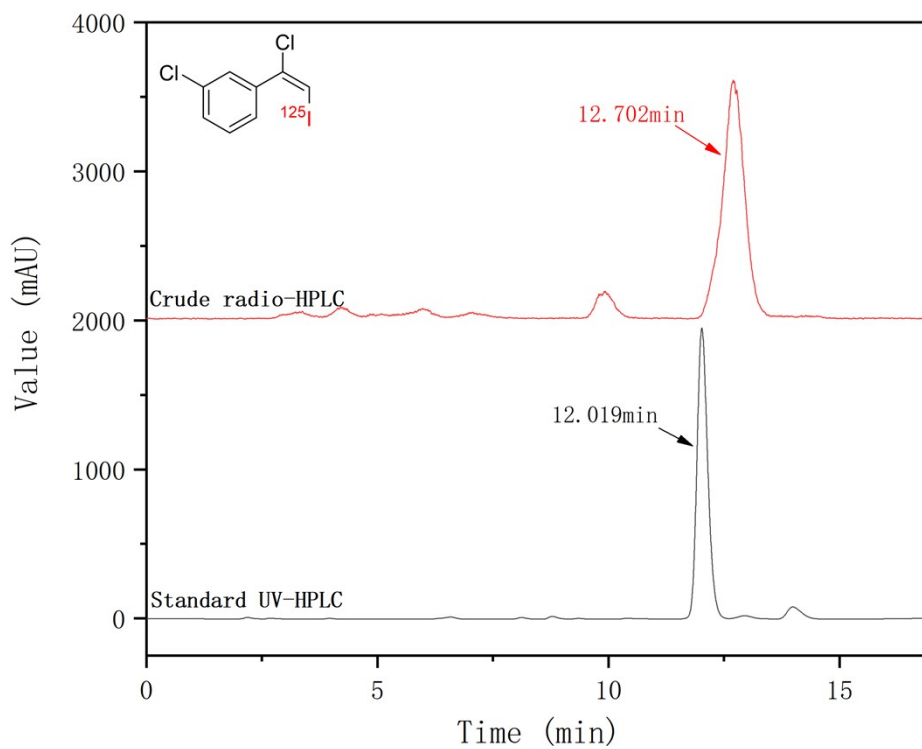

HPLC condition (SB-C18, MeCN/0.1 M ammonium formate buffer = 75/25, flow rate = 1 mL/min,  $\lambda$  = 220nm)

**3bh**, tR = 6.42 min, RCY = 65 ± 5%, n = 3

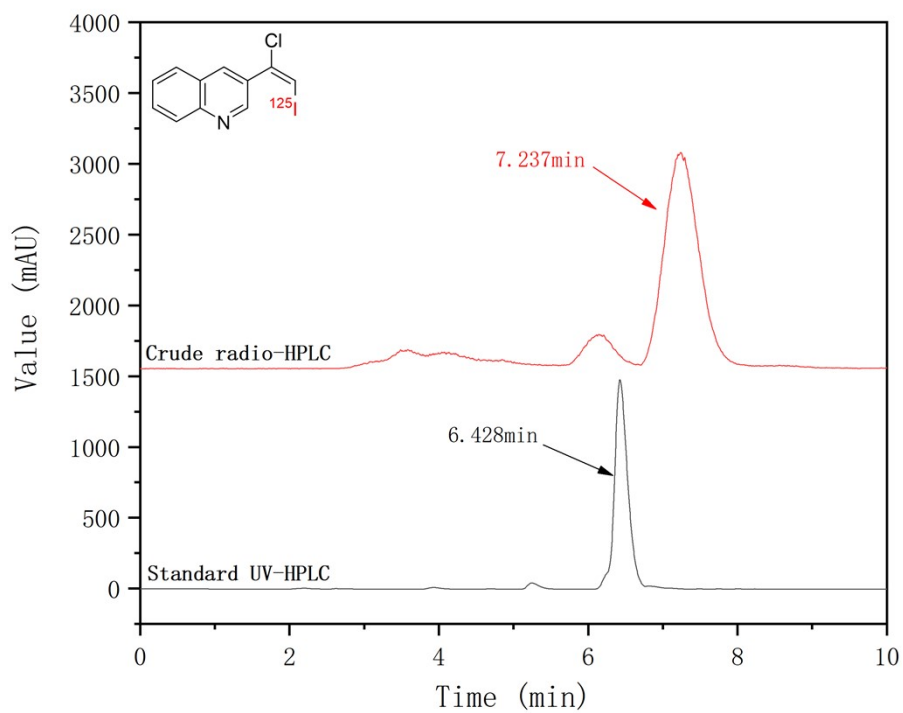

HPLC condition (SB-C18, MeCN/0.1 M ammonium formate buffer=75/25, flow rate = 1 mL/min,  $\lambda$  = 220 nm)

**3bi**, tR = 5.92 min, RCY = 76 ± 4%, n = 3

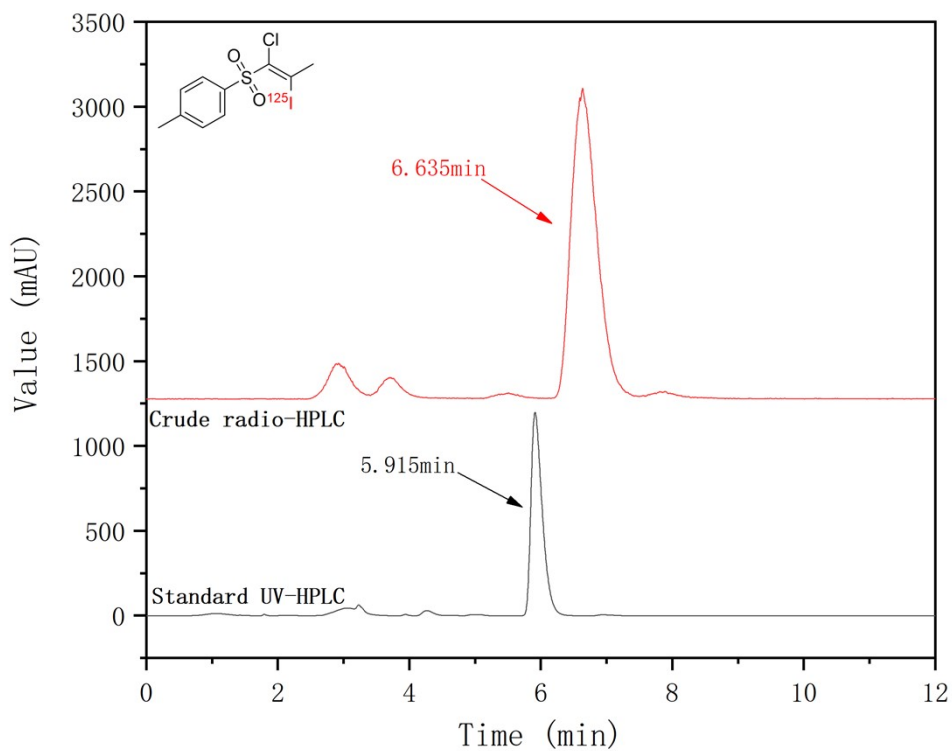

HPLC condition (SB-C18, MeCN/0.1 M ammonium formate buffer = 70/30, flow rate = 1 mL/min,  $\lambda$  = 220nm)

**3bj**, tR = 7.17 min, RCY = 30 ± 7%, n = 3

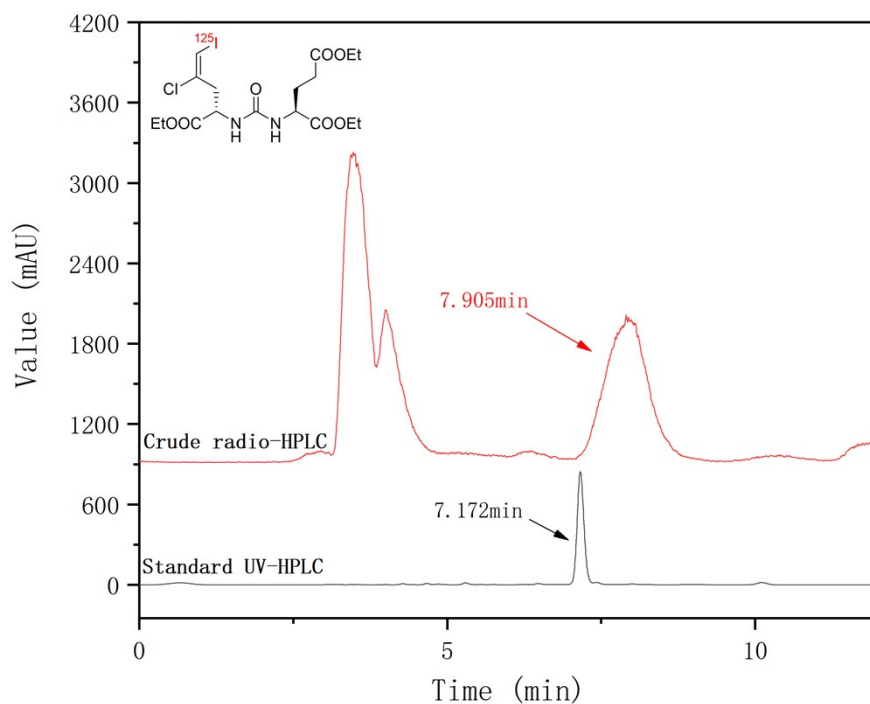

HPLC condition (SB-C18, MeCN/0.1 M ammonium formate buffer = 50/50, flow rate= 1 mL/min,  $\lambda$  = 220nm)

**3bk**, tR = 15.25 min, RCY = 28 ± 10%, n = 3

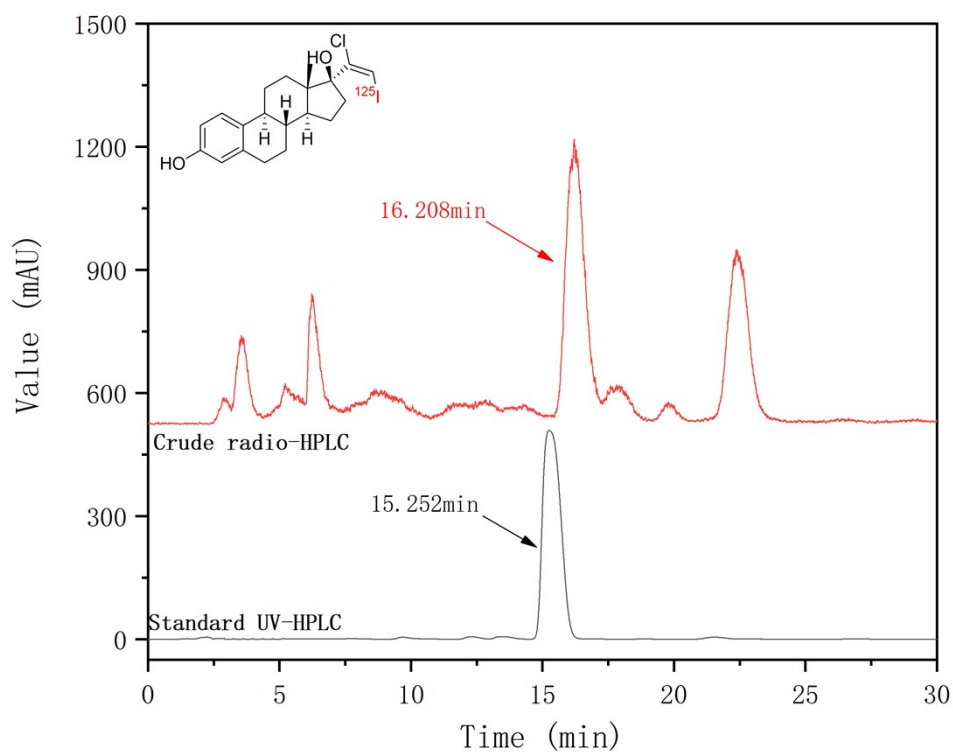

HPLC condition (SB-C18, MeCN/0.1 M ammonium formate buffer = 50/50, flow rate = 1 mL/min,  $\lambda$  = 220nm)

**3bl**, tR = 6.70 min, RCY = 45 $\pm$ 7%, n = 5

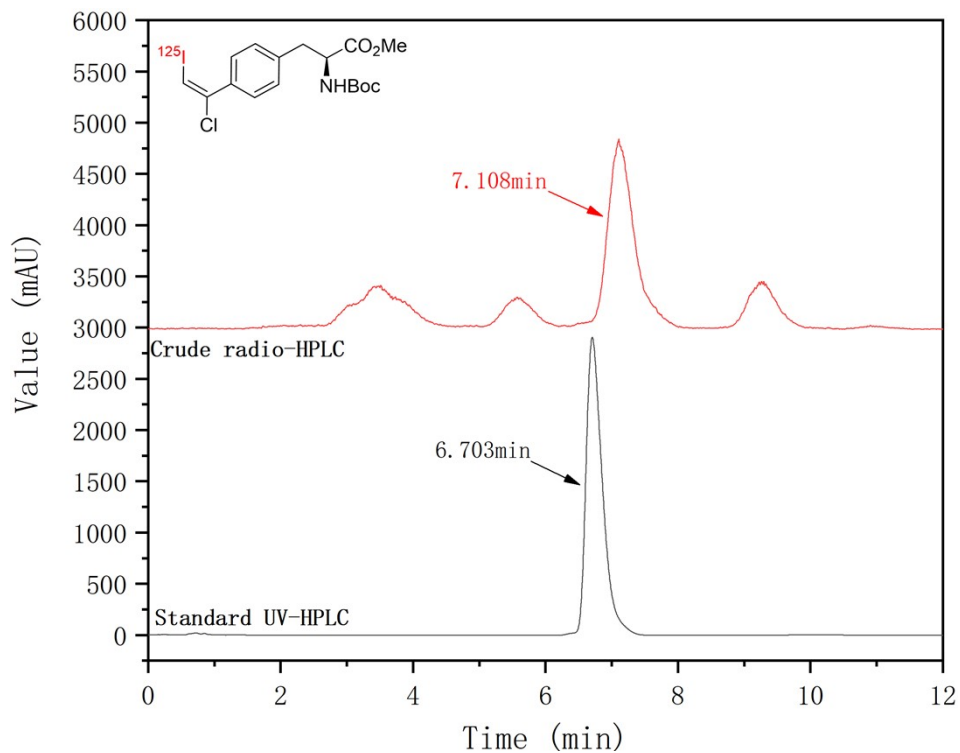

HPLC condition (SB-C18, MeCN/0.1 M ammonium formate buffer = 70/30, flow rate = 1 mL/min,  $\lambda$  = 220nm)

**3bm**, tR = 7.94 min, RCY = 93 $\pm$ 3%, n = 6

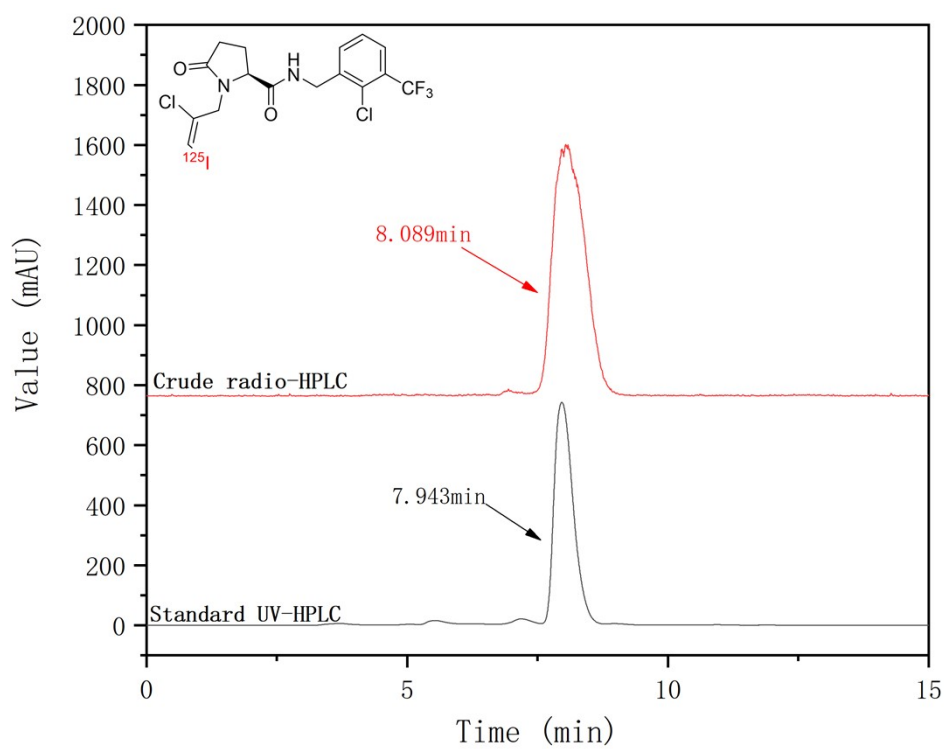

HPLC condition (SB-C18, MeCN/0.1 M ammonium formate buffer = 50/50, flow rate = 1 mL/min,  $\lambda = 220\text{nm}$ )

# 6. Copies of NMR Spectra

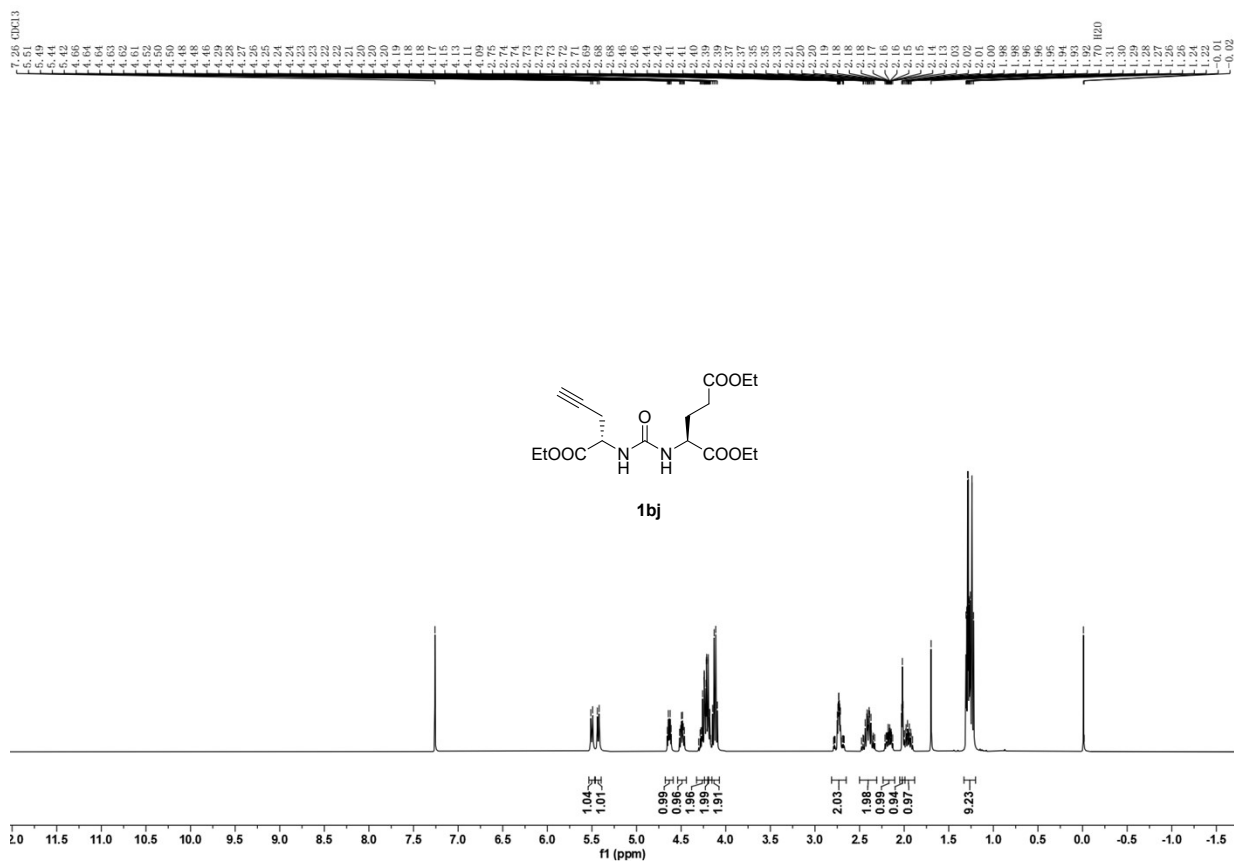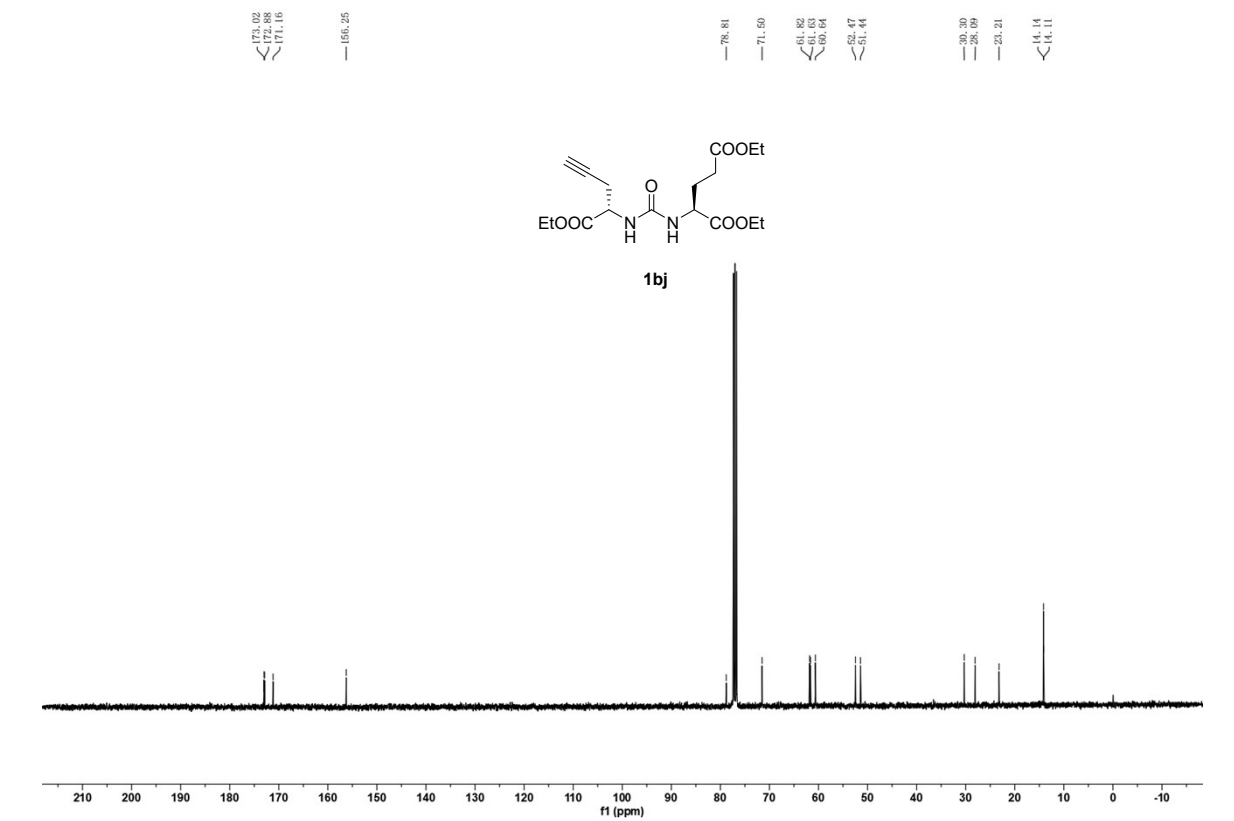

7.68  
7.66  
7.65  
7.63  
7.62  
7.61  
7.39  
7.37  
7.35  
7.32  
6.57  
6.56  
6.54  
4.66  
4.64  
4.62  
4.62  
4.60  
4.58  
4.50  
4.49  
4.48  
4.45  
4.45  
4.28  
4.28  
4.27  
4.27  
4.26  
4.25  
4.25  
3.72  
3.71  
3.70  
3.68  
3.67  
2.88  
2.88  
2.85  
2.85  
2.84  
2.52  
2.52  
2.50  
2.49  
2.49  
2.47  
2.46  
2.42  
2.42  
2.41  
2.40  
2.39  
2.38  
2.38  
2.38  
2.37  
2.37  
2.36  
2.35  
2.35  
2.35  
2.20  
2.18  
2.18  
2.17  
2.13  
2.12  
2.11  
2.11  
2.10  
2.09  
2.08  
2.08  
2.07  
2.07  
2.05  
2.05  
2.04  
2.02  
2.00  
1.66  
-0.01

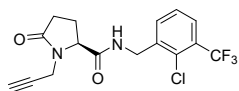

1bm

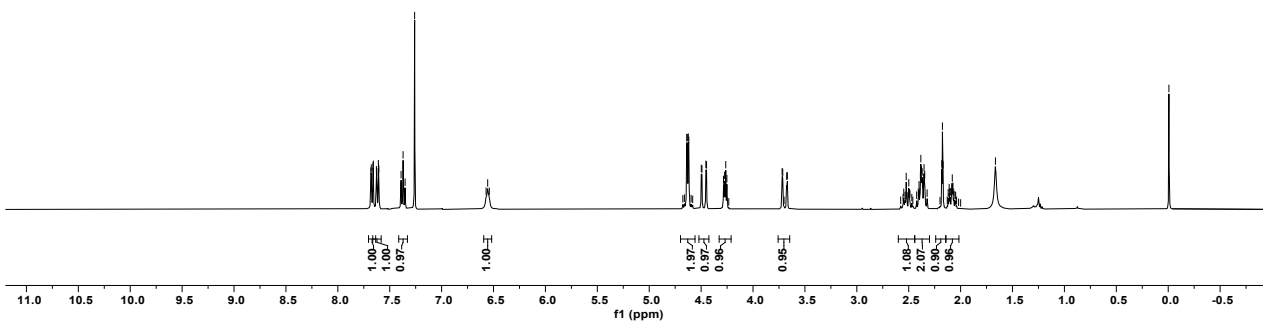

175.20  
171.00  
137.48  
133.81  
131.70  
129.08  
127.76  
127.26  
127.16  
126.95  
121.82  
73.30  
60.52  
41.71  
31.50  
29.48  
23.38

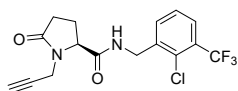

1bm

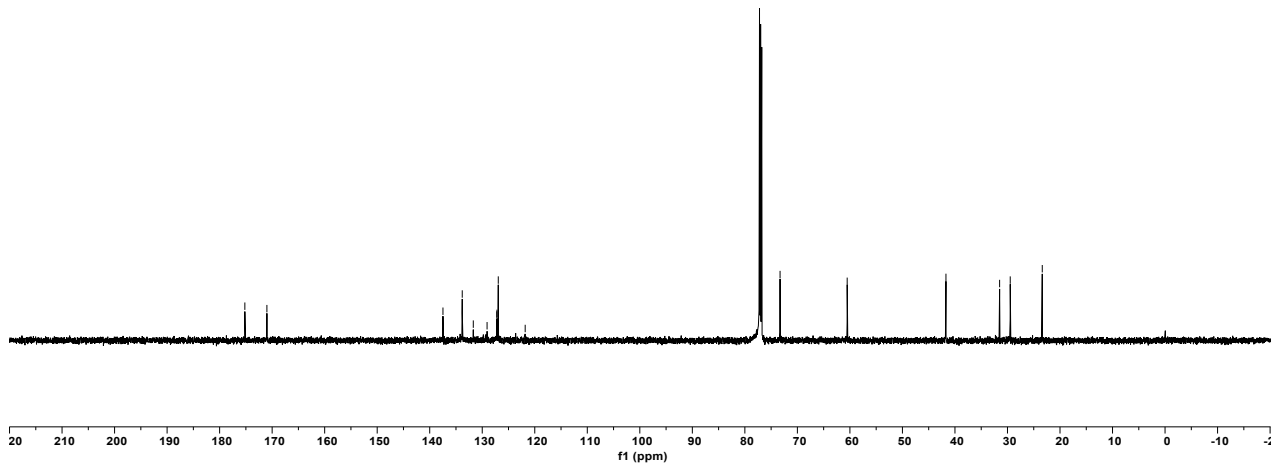





LSW-CL-I

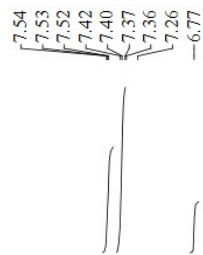

1.57

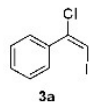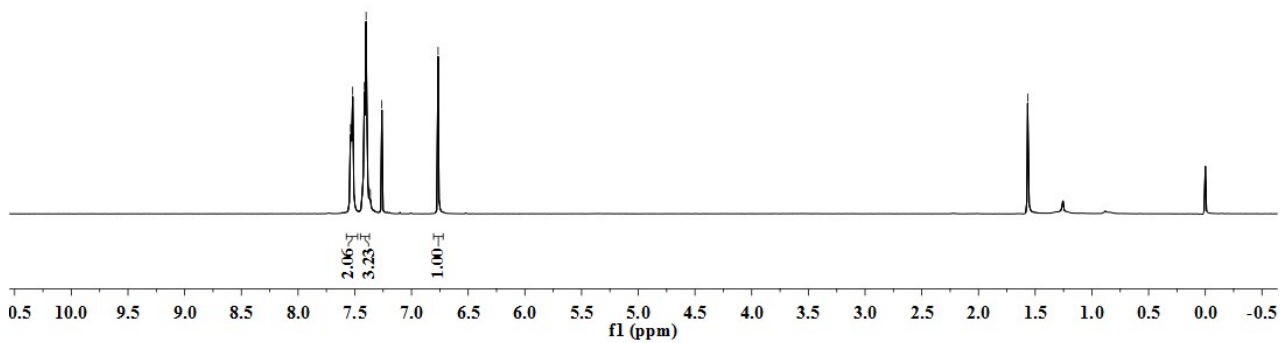

LSW-CL-I

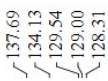

73.01

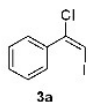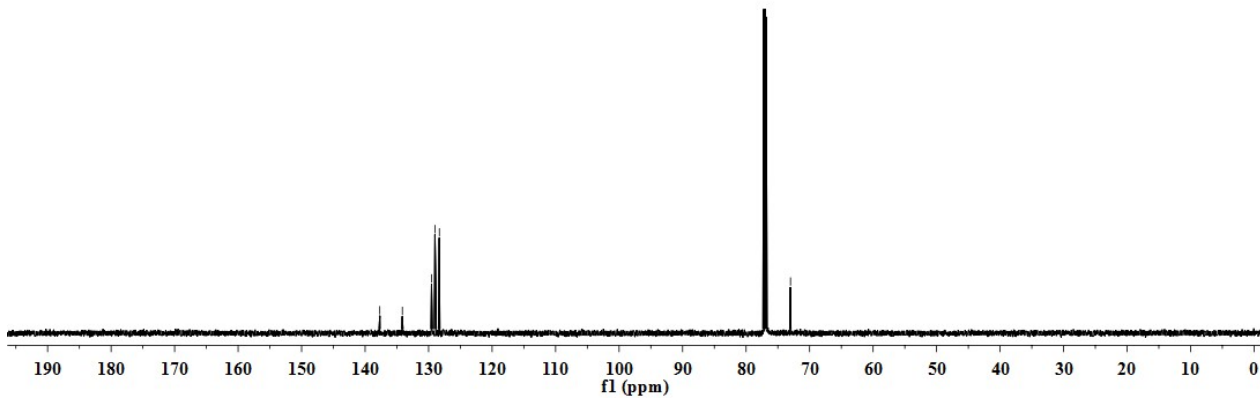

LSW-2BR-12233

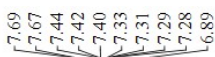

12

LSW-2BR-CL-I

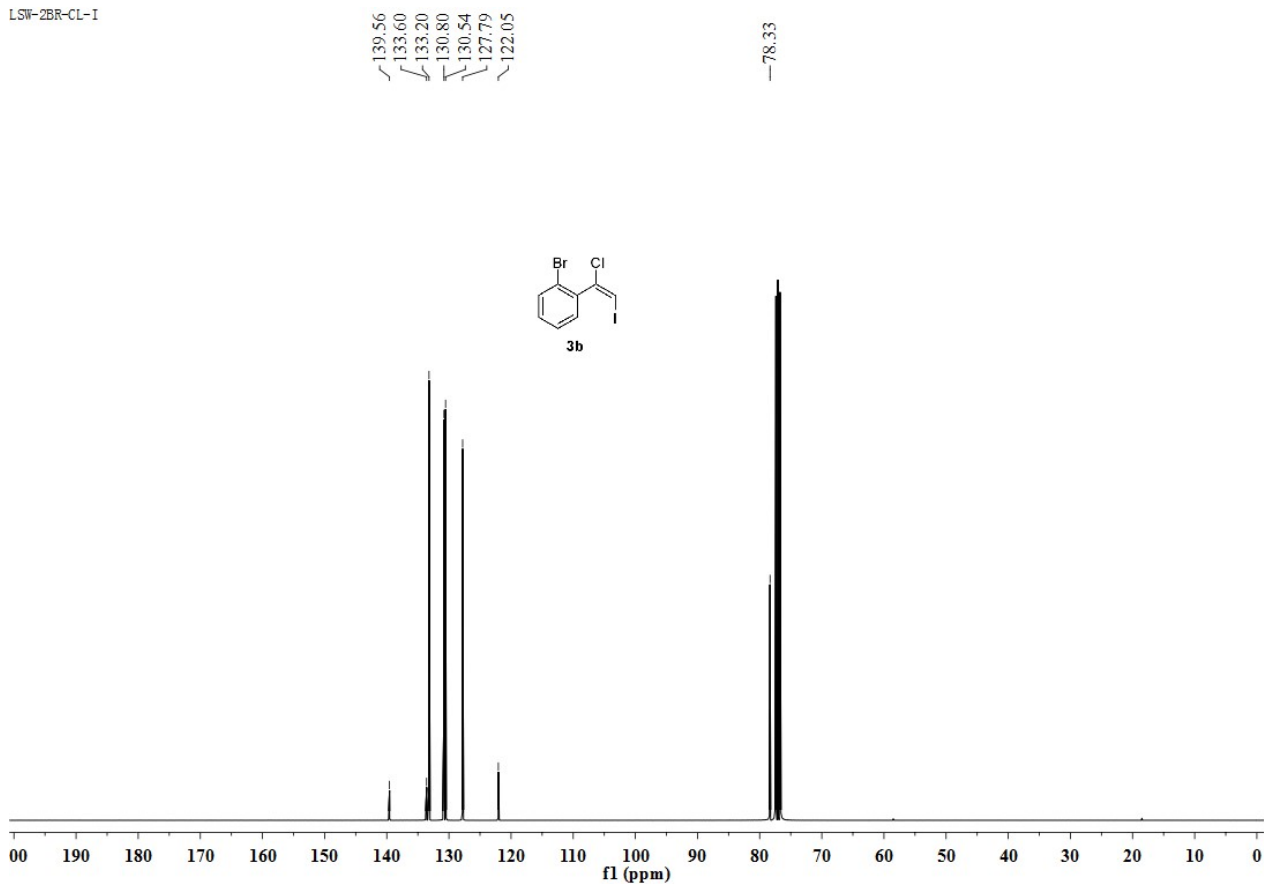

LSW-2ET-CL-I

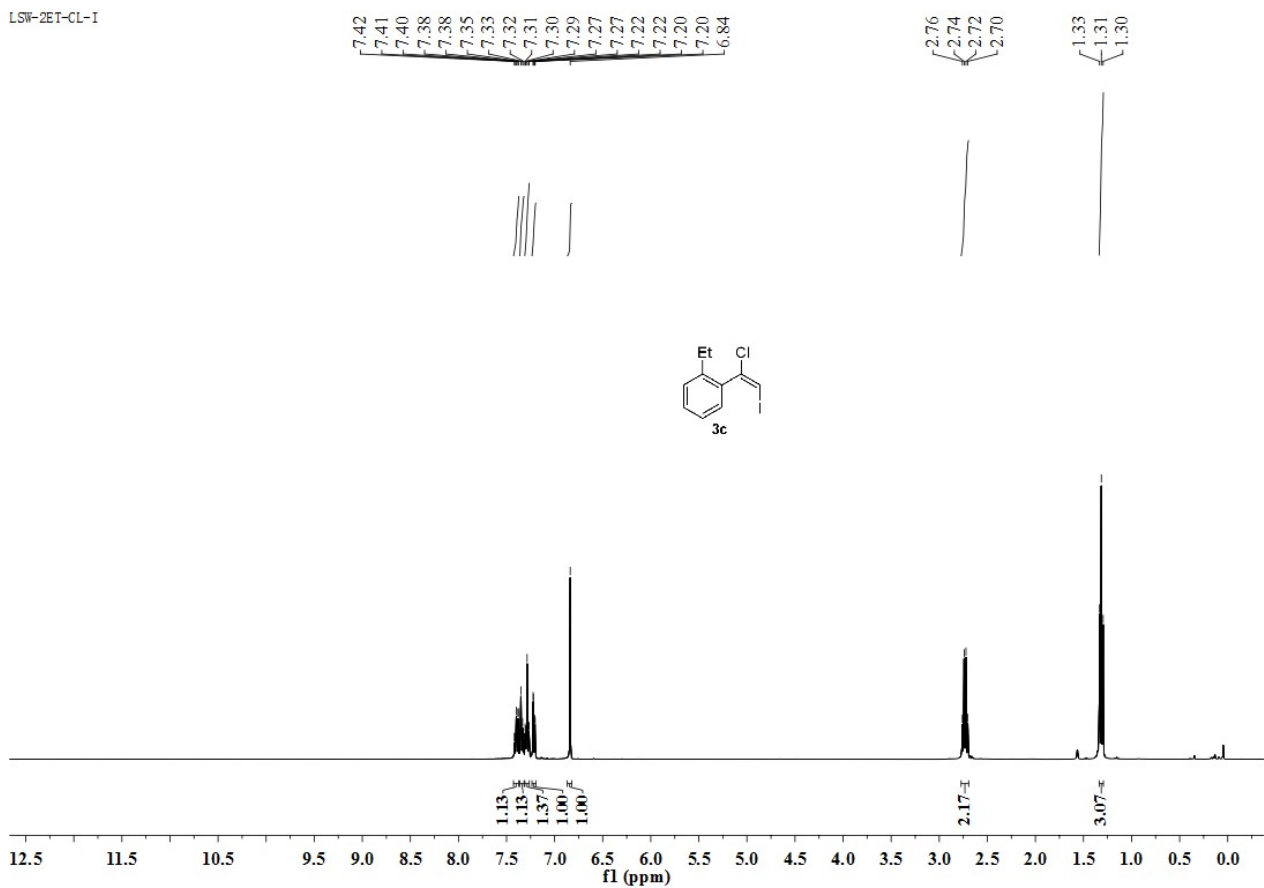

LSW-2ET-CL-I

141.74  
137.72  
134.68  
129.75  
129.06  
128.77  
126.14

25.82  
14.89

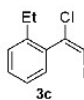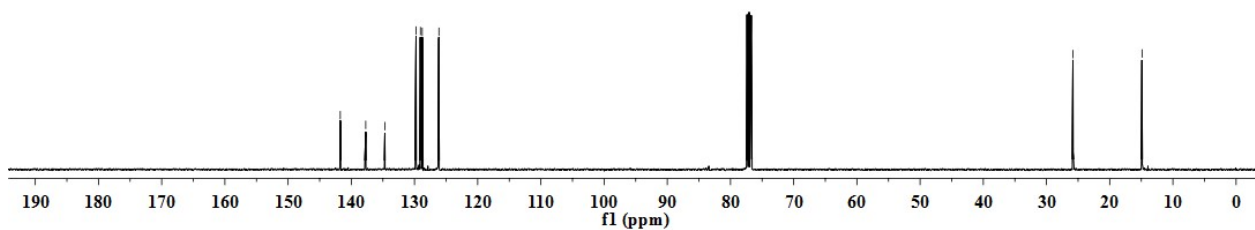

1sw-2-1pr

7.45  
7.45  
7.43  
7.43  
7.42  
7.42  
7.40  
7.30  
7.29  
7.28  
7.27  
7.26  
7.26  
7.20  
7.20  
7.18  
6.85

3.19  
3.17  
3.15  
3.14  
3.12

1.34  
1.32  
1.31  
1.30

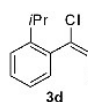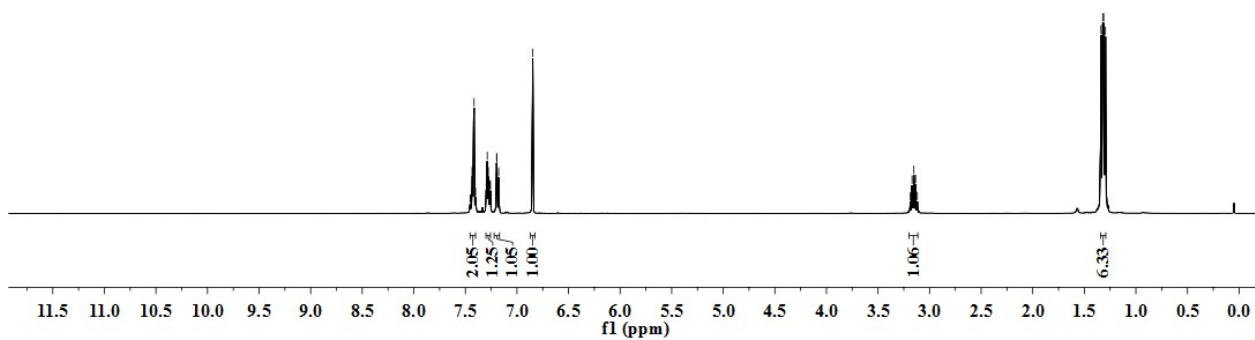

LSW-2-IPR-CL-I

146.59  
137.21  
134.79  
129.95  
128.94  
126.12  
126.07

76.92

30.40  
24.21  
23.85

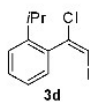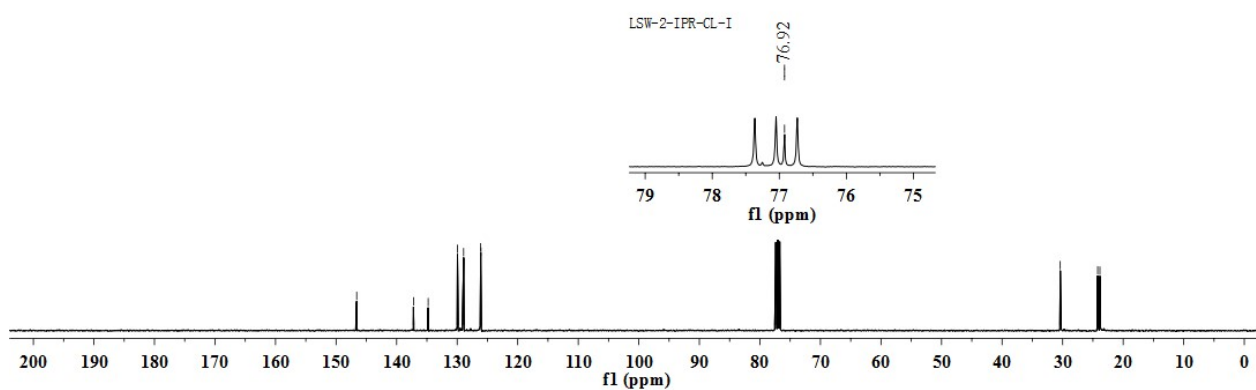

1sw-3cn

7.82  
7.77  
7.75  
7.69  
7.67  
7.56  
7.54  
7.52  
7.26  
6.90

1.56

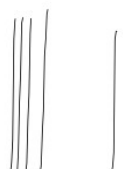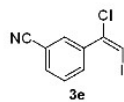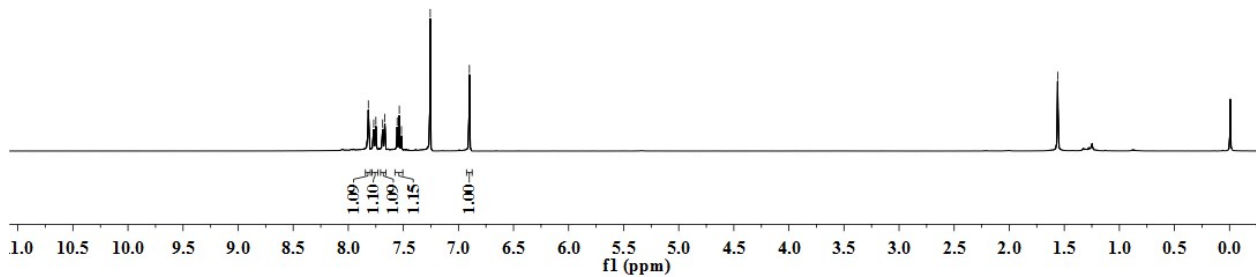

15N-3-cn-cl-I

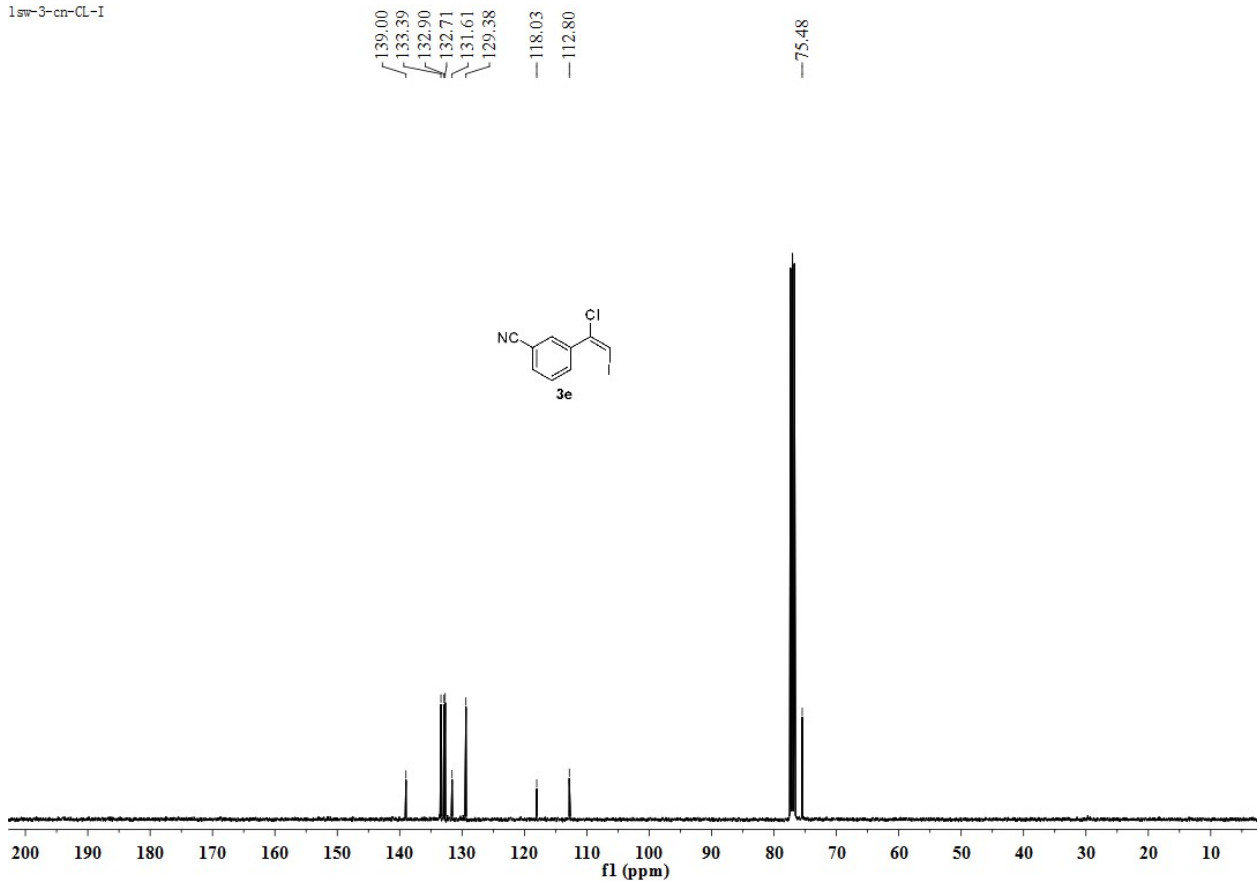

LSW-N02-12231

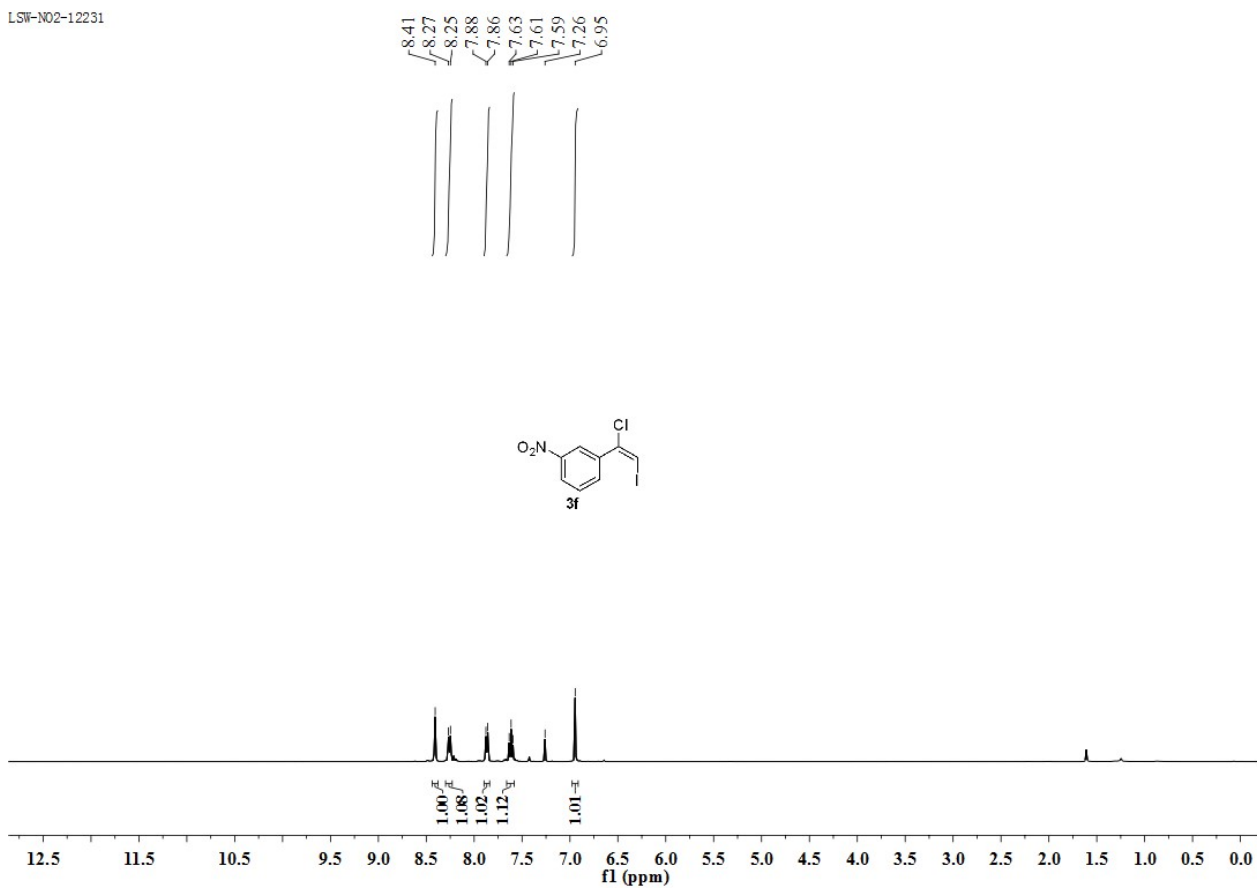

LSW-N02-12231

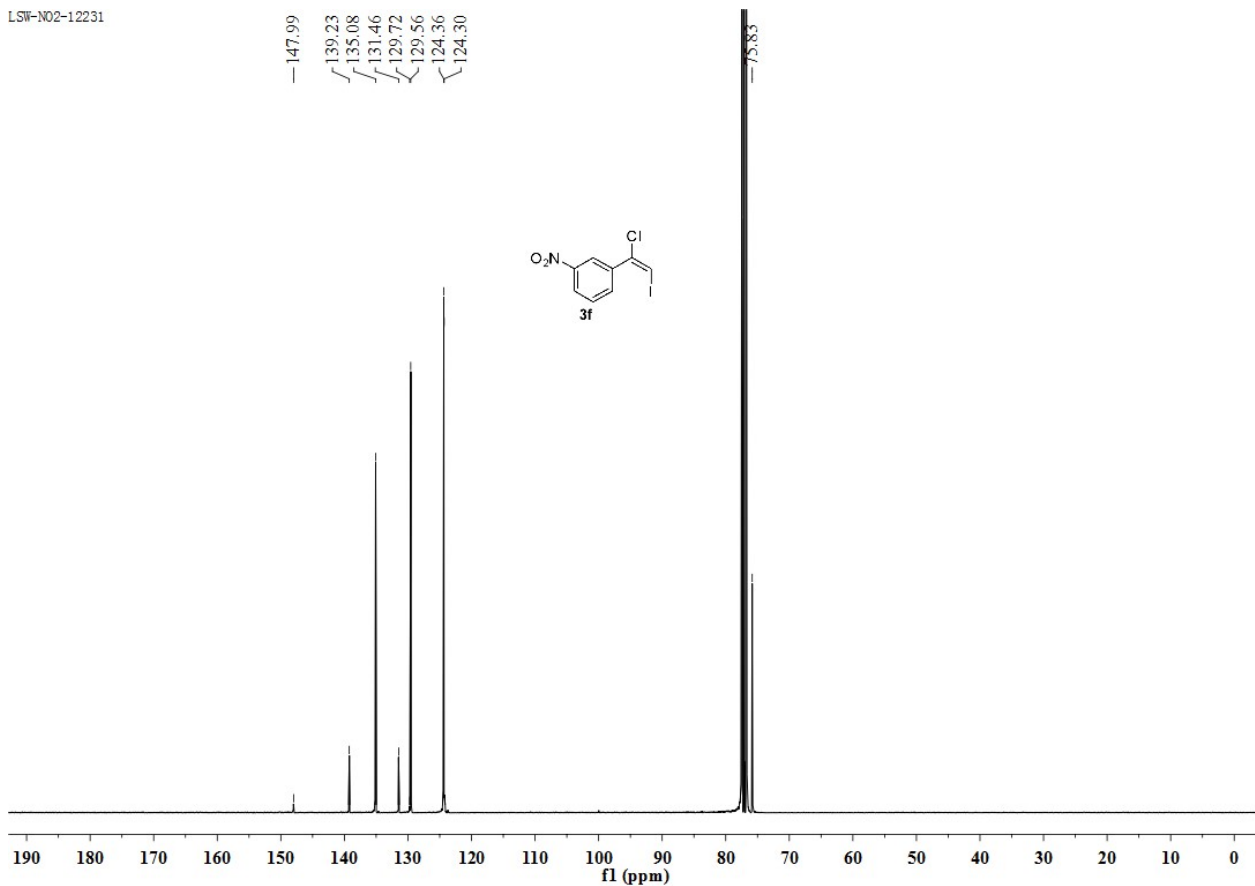

LSW-3F-CL-I

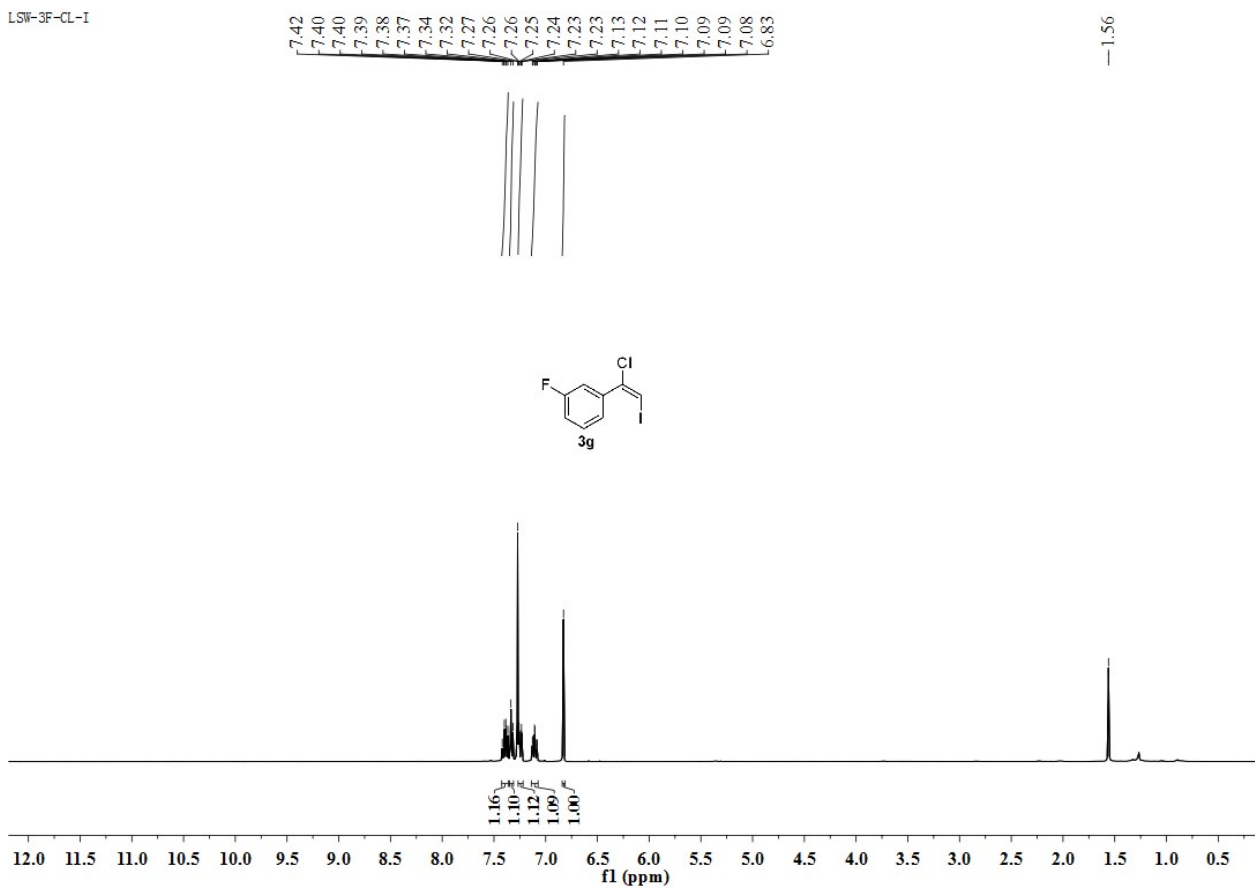

LSW-3F-CL-I

-112.14  
-112.15  
-112.16

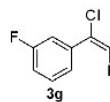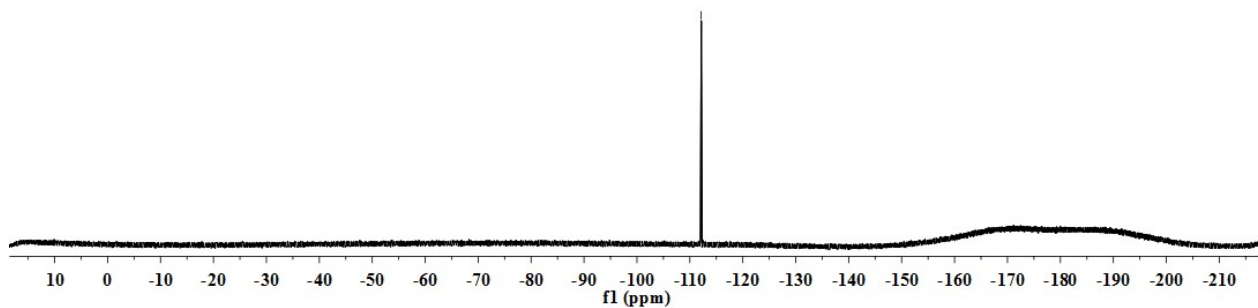

LSW-3F-CL-I

163.51  
161.05  
139.63  
139.55  
132.70  
132.67  
130.01  
129.93  
124.84  
116.67  
116.46  
116.29  
116.06

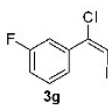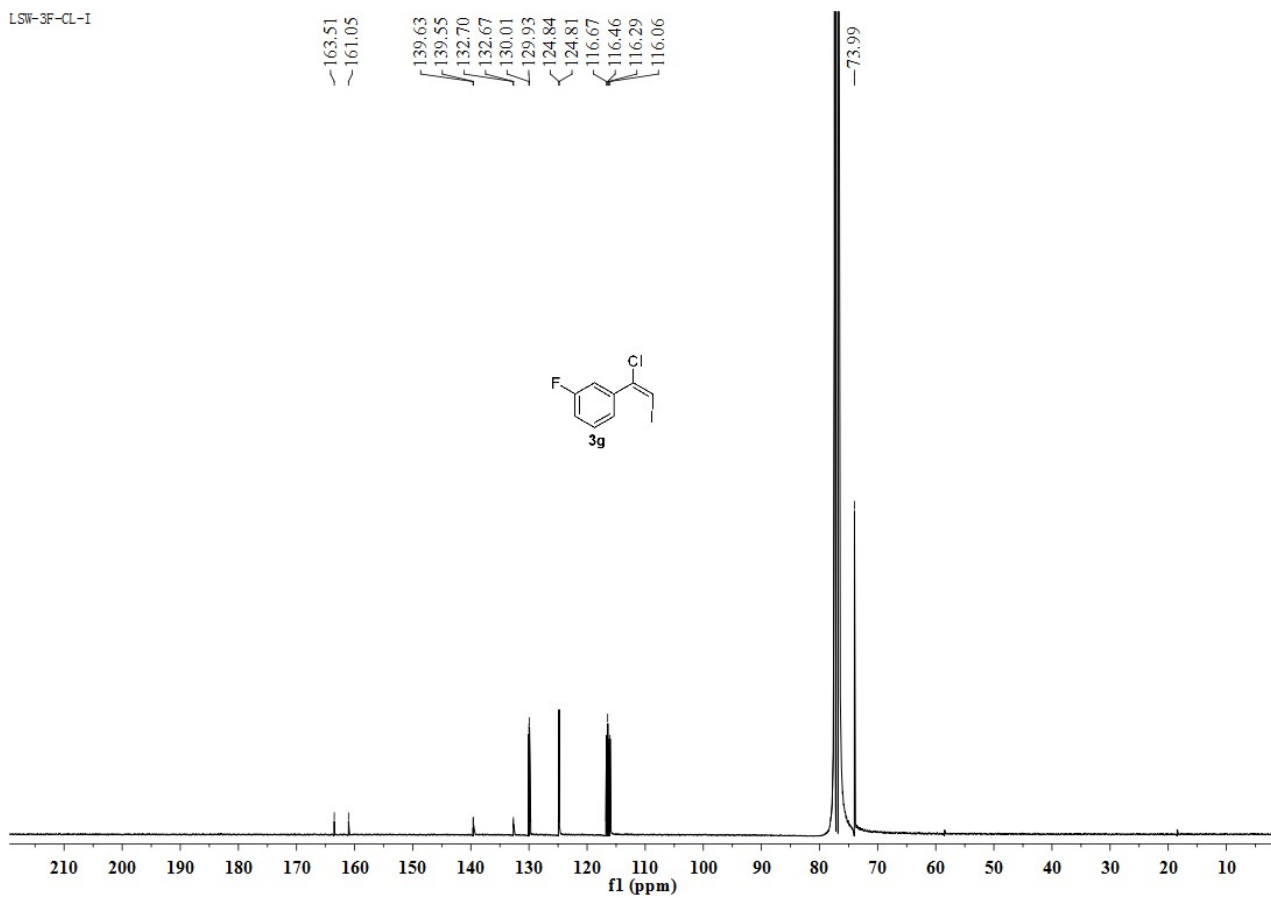



1sw-3oh-cl-i

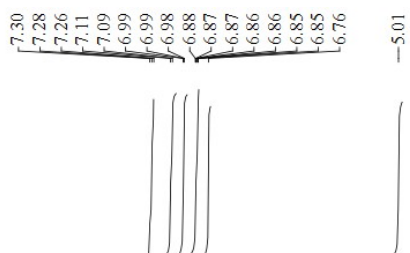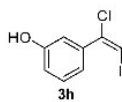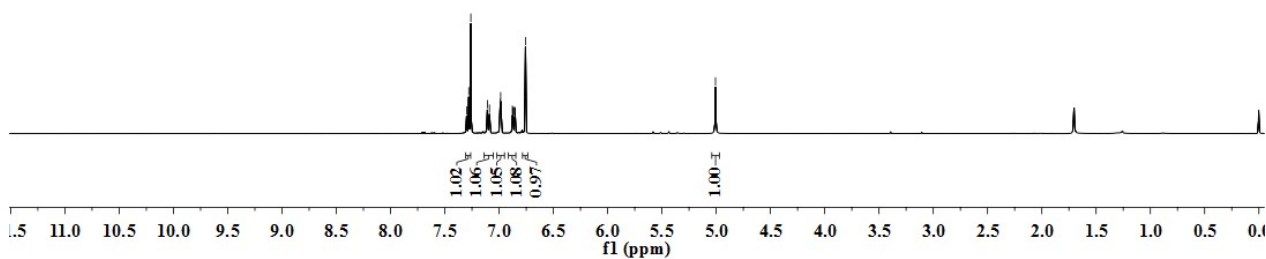

1sw-3-oh-cl-i

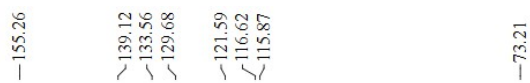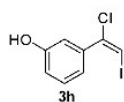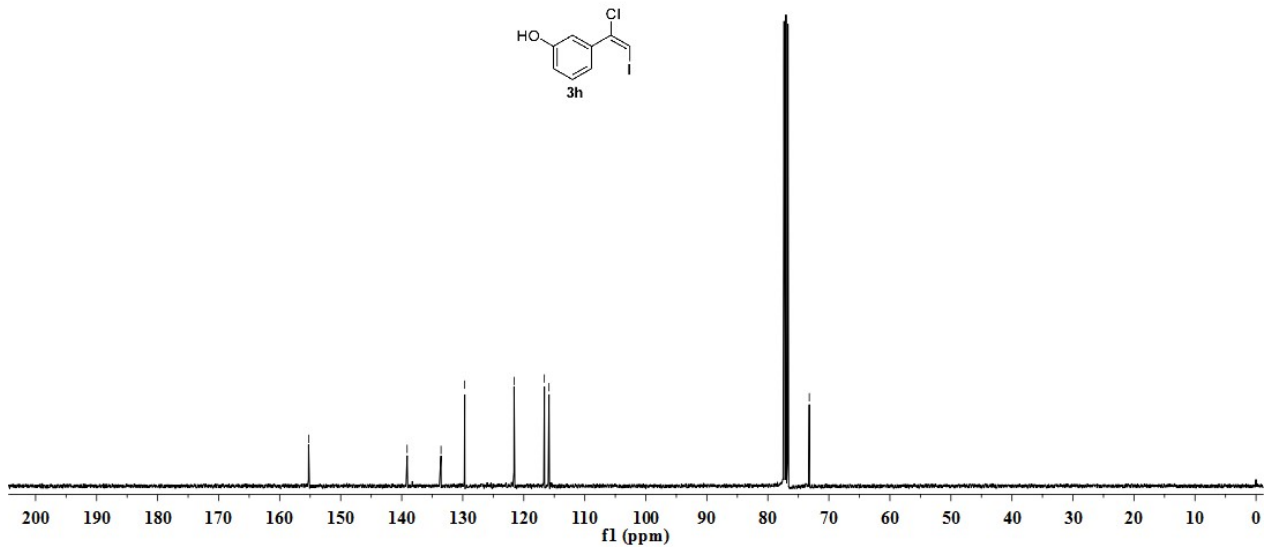

1sw-3nts

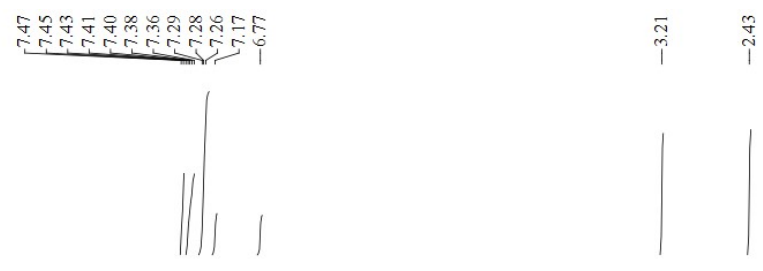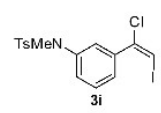

1.0 10.5 10.0 9.5 9.0 8.5 8.0 7.5 7.0 6.5 6.0 5.5 5.0 4.5 4.0 3.5 3.0 2.5 2.0 1.5 1.0 0.5 0.0  
f1 (ppm)

LSW-3-NIS-CL-I

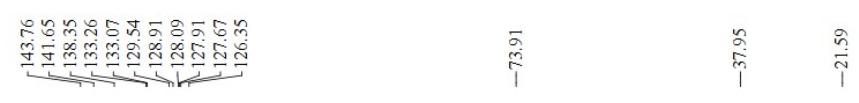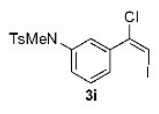

190 180 170 160 150 140 130 120 110 100 90 80 70 60 50 40 30 20 10 0  
f1 (ppm)

1sw-4-ac

8.00  
7.98  
7.63  
7.61  
7.26  
6.86

2.62

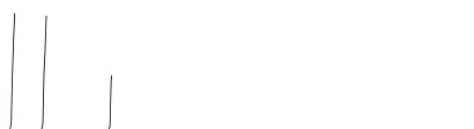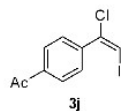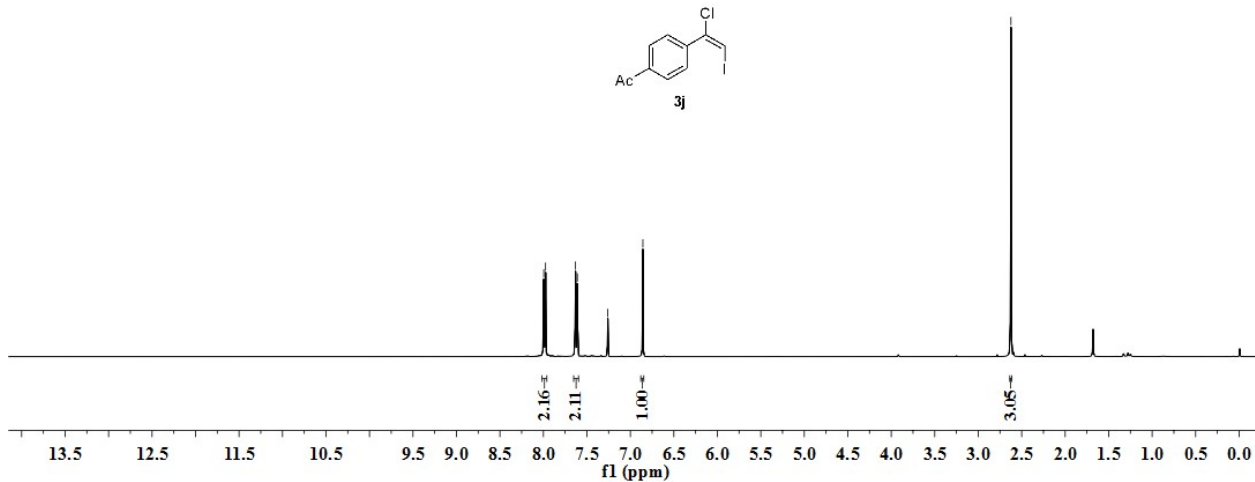

LSW-4-AC-Cl

197.25

142.05  
137.50  
132.93  
129.34  
128.32

74.51

26.73

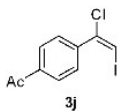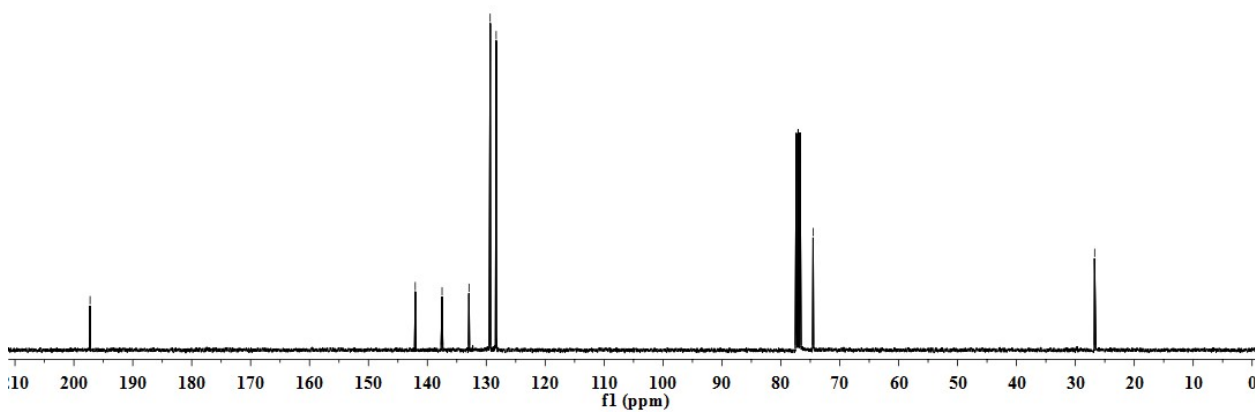

1sw-4co2me

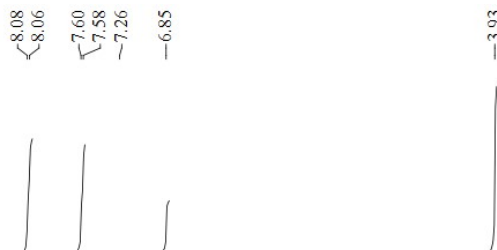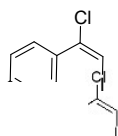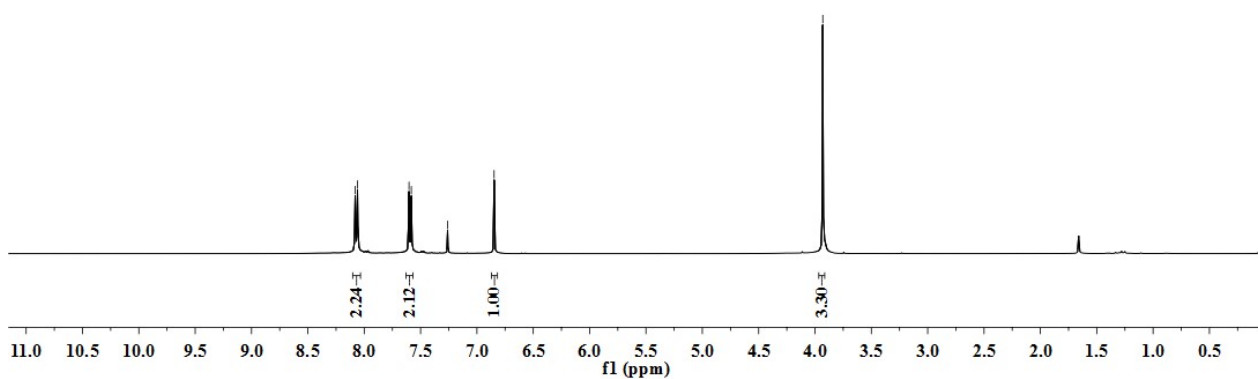

LSW-4-COOME-CL-I

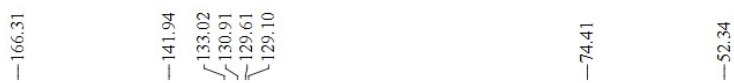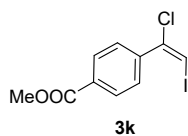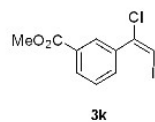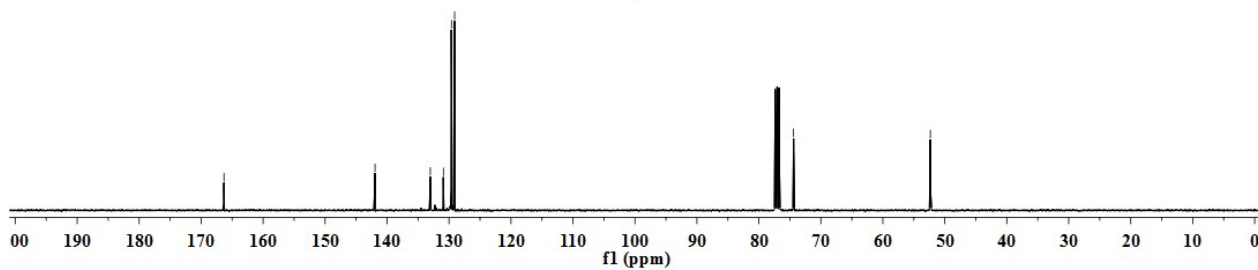

1sw-cf3-1218

7.69  
7.67  
7.66  
7.64  
7.26  
6.88

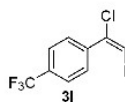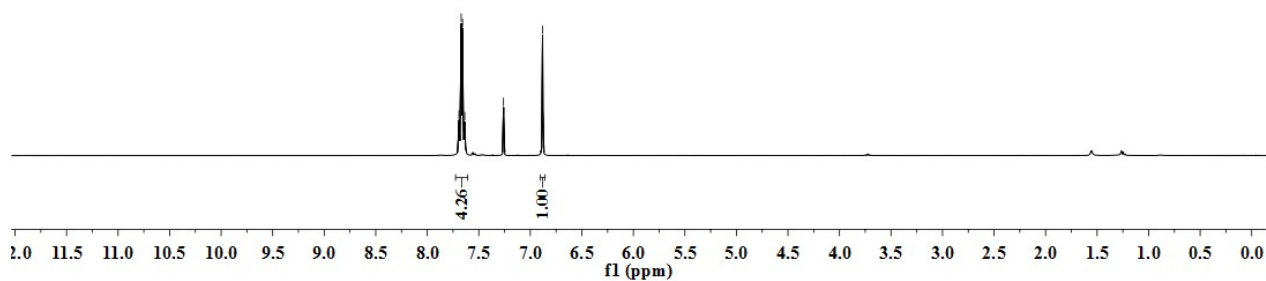

LSW-4-CF3-CL-I

-62.89

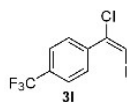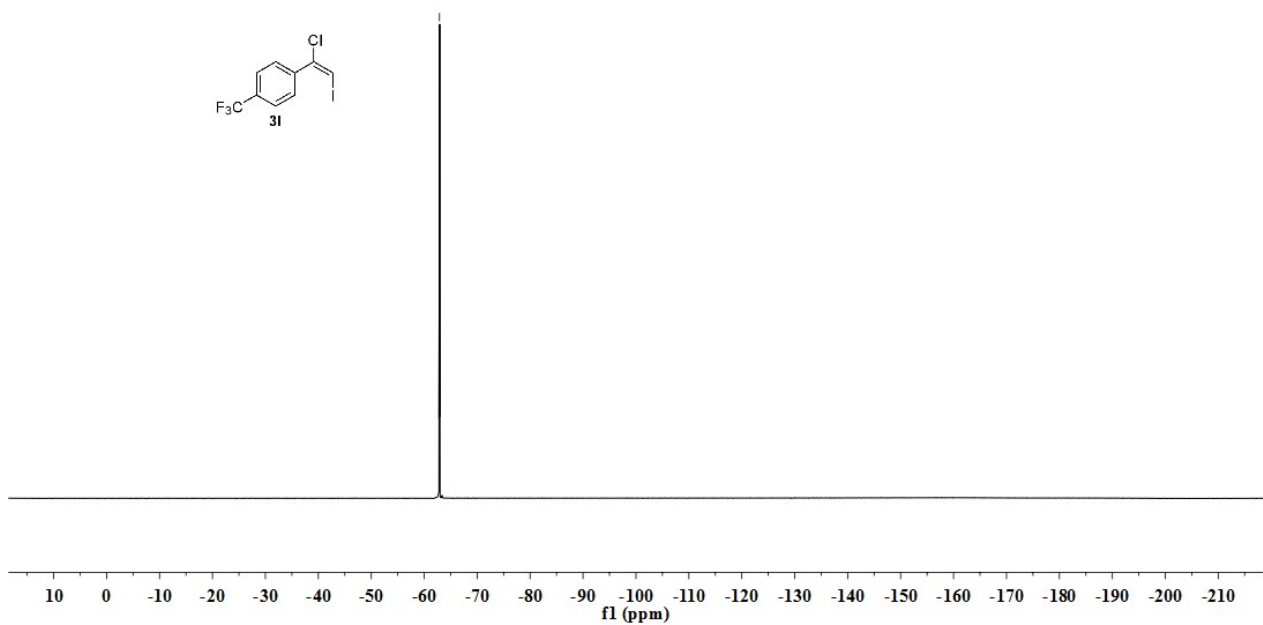

1sw-cf3-1218

141.18  
132.59  
131.86  
131.53  
131.21  
130.88  
129.51  
127.80  
125.49  
125.45  
125.42  
125.38  
125.09  
122.39  
119.68

74.73

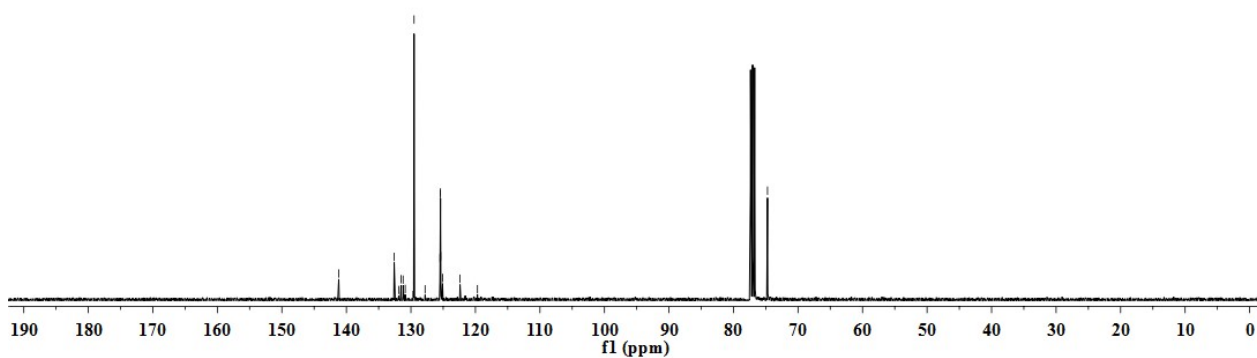

LSW-4-OCF3-CL-I

7.62  
7.59  
7.29  
7.27  
6.85

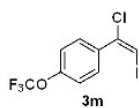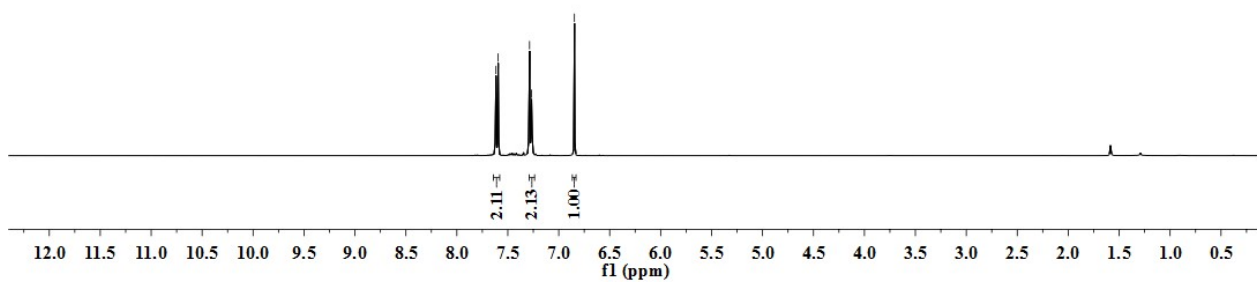

LSW-4-OCF3-CL-I

--57.70

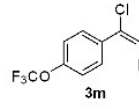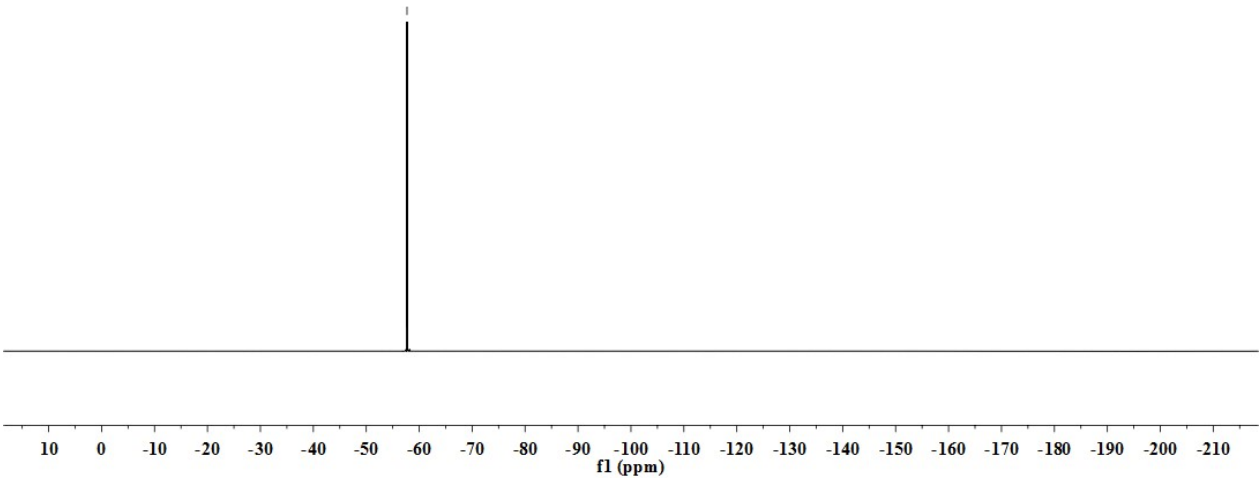

LSW-4-OCF3-CL-I

149.66  
149.64  
136.11  
132.73  
130.80  
124.22  
121.66  
120.53  
120.52  
119.10  
116.53  
73.95

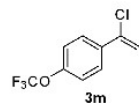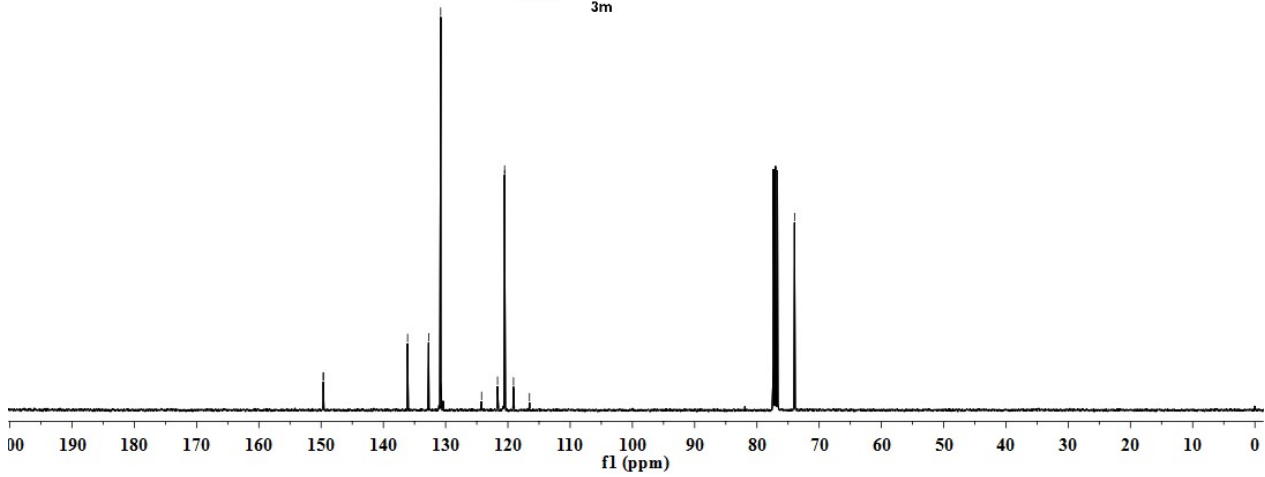

1sw-4cl-i-cl

7.48  
7.46  
7.39  
7.37  
7.25  
6.79

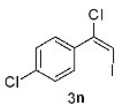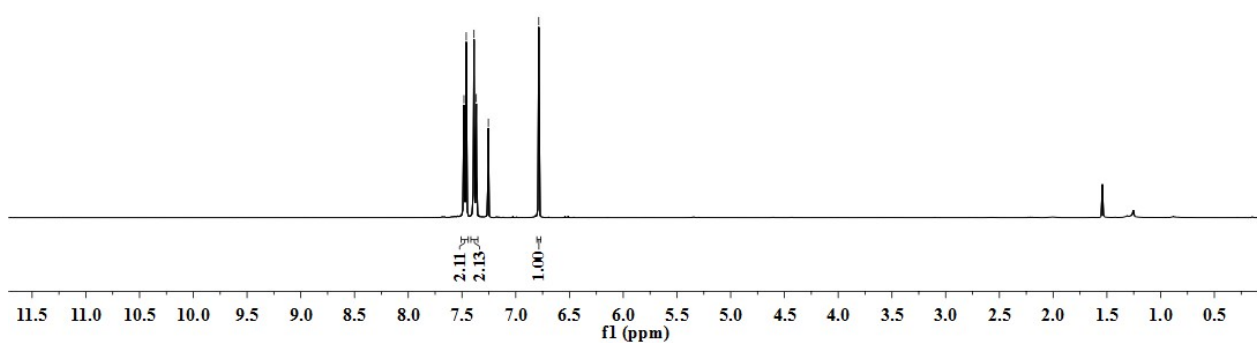

1sw-4cl-i-cl

136.06  
135.48  
133.01  
130.43  
128.61

73.69

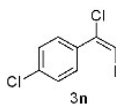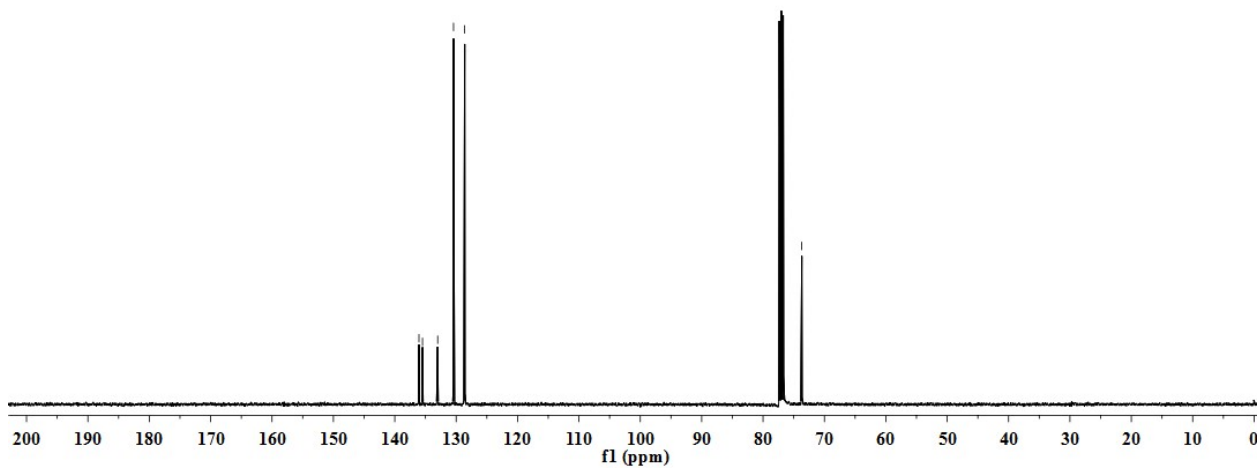



LSW-4BR-I-CL

7.55  
7.54  
7.41  
7.40  
7.26  
6.79

1.56

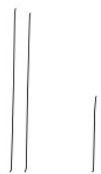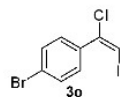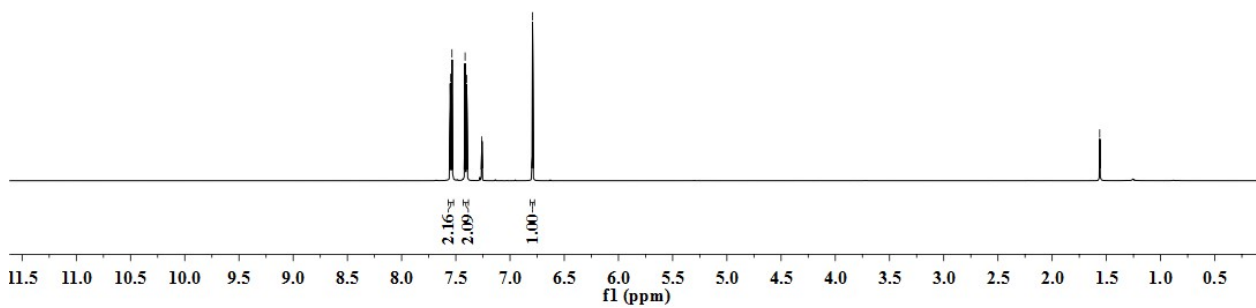

LSW-4-BR-CL-I

136.54  
133.04  
131.58  
130.64  
123.78

73.72

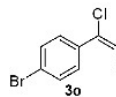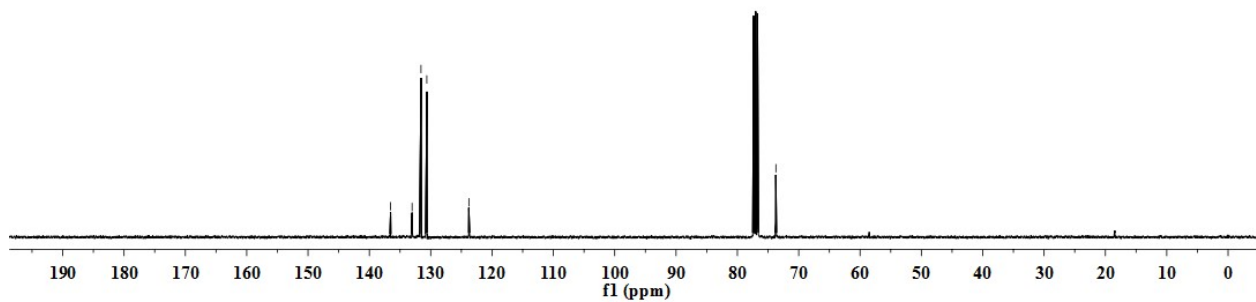

LSW-4-tBU-CL-I

7.51  
7.49  
7.43  
7.41  
7.26  
-6.73

-1.35

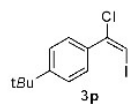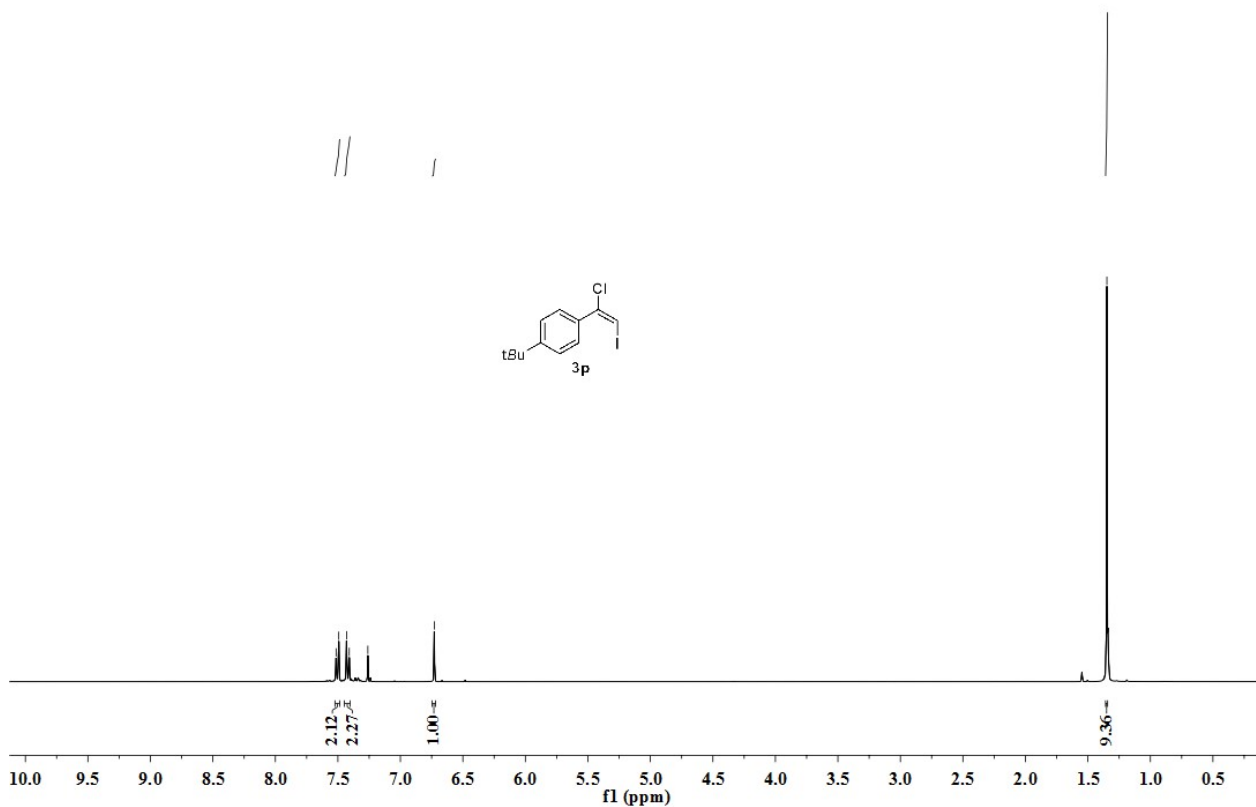

LSW-TBU-CL-I

152.73  
134.51  
134.22  
128.75  
125.16

-72.02

-34.86  
-31.24

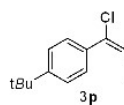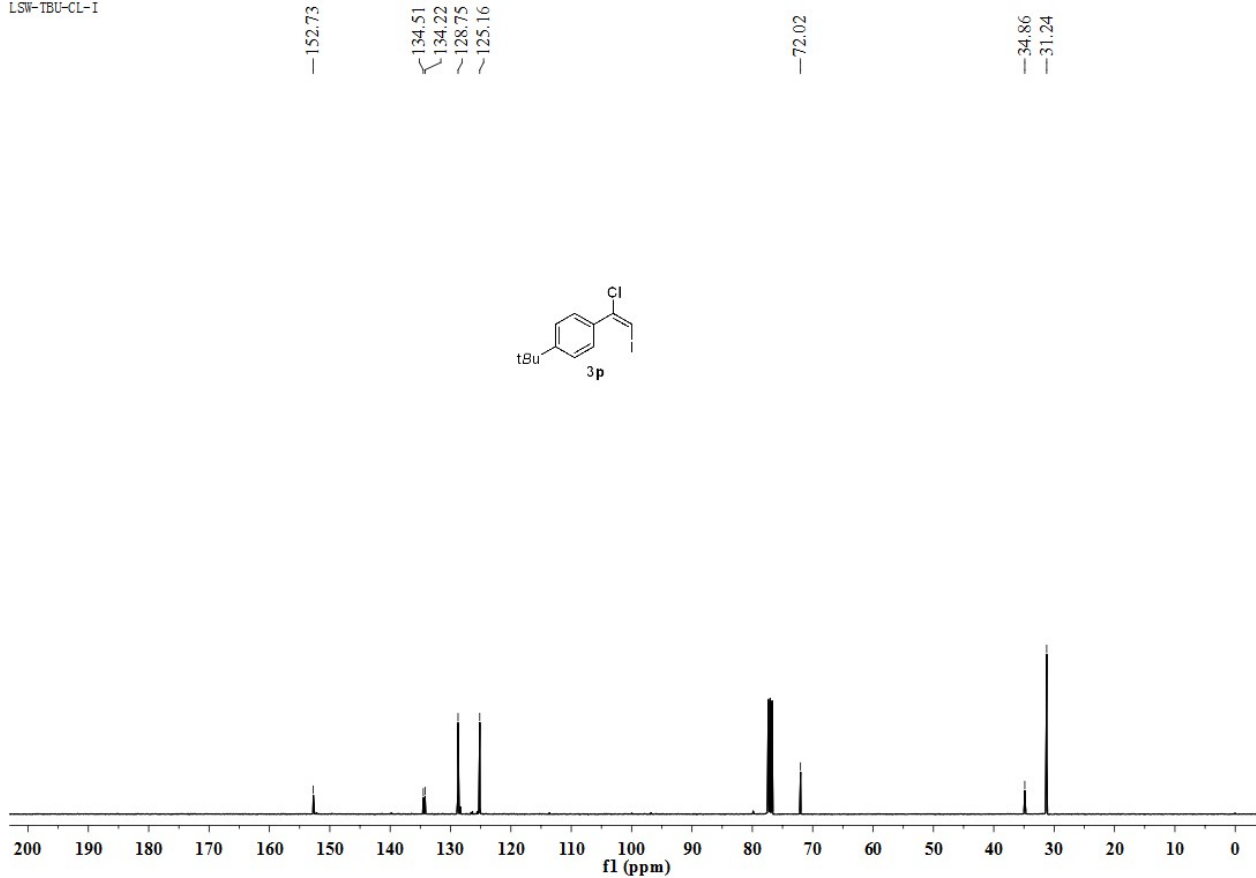

LSW-4PH-CL-I-1

7.70  
7.70  
7.68  
7.54  
7.52  
7.51  
7.46  
7.45  
7.44  
7.43  
6.85

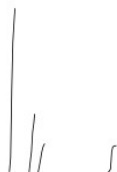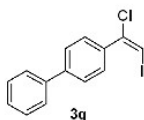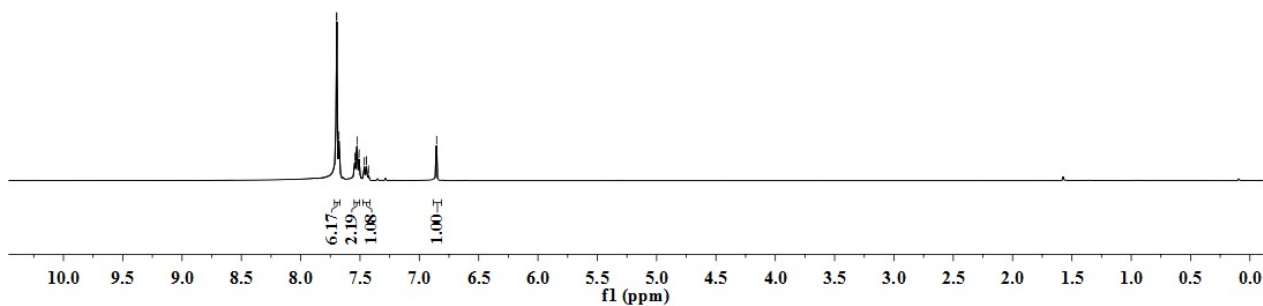

LSW-4PH-CL-I-1

142.34  
140.22  
136.42  
133.93  
129.59  
128.97  
127.90  
127.25  
127.00

73.05

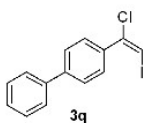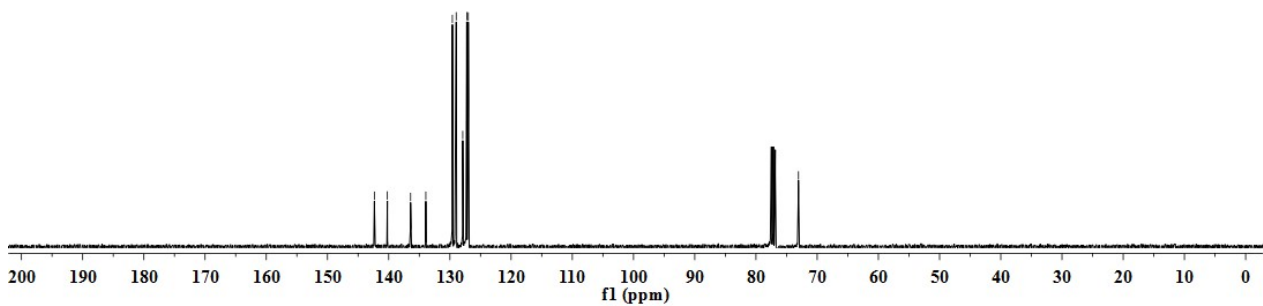

1sw-obn-cl-i

7.56  
7.56  
7.55  
7.54  
7.53  
7.49  
7.47  
7.46  
7.44  
7.42  
7.40  
7.39  
7.38  
7.37  
7.29  
7.04  
6.72  
-5.13

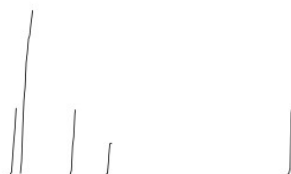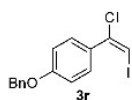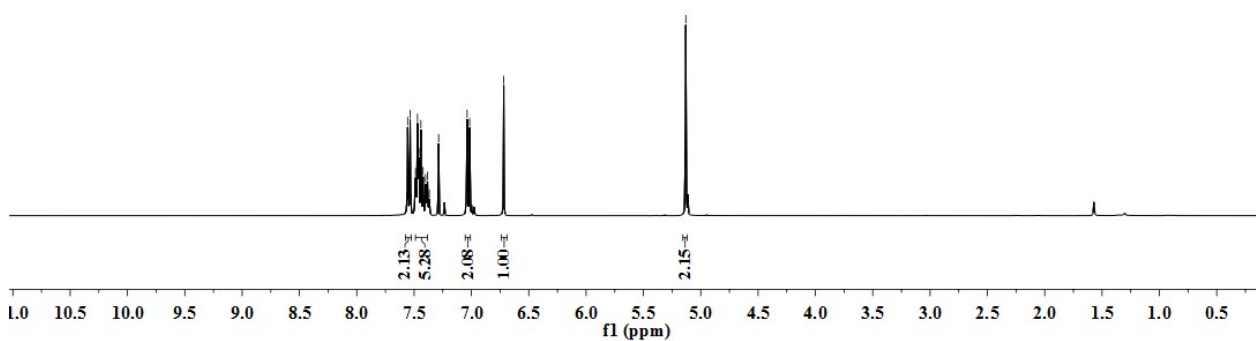

1sw-obn-cl-i

159.54  
136.55  
134.03  
130.67  
130.06  
128.68  
128.17  
127.54  
114.41  
71.78  
70.12

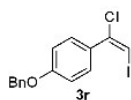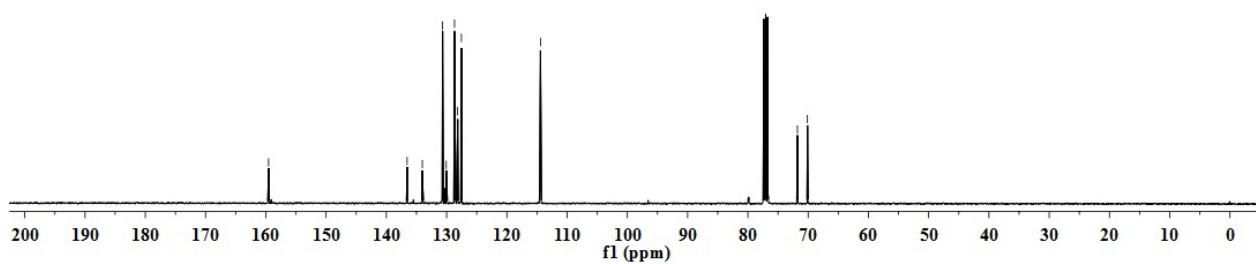

LSW-NAI-Cl  
 8.04  
 8.03  
 7.90  
 7.89  
 7.88  
 7.87  
 7.85  
 7.62  
 7.61  
 7.60  
 7.59  
 7.57  
 7.55  
 7.55  
 7.54  
 7.53  
 7.53  
 7.51  
 7.26  
 -6.85

-1.56

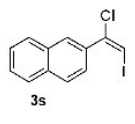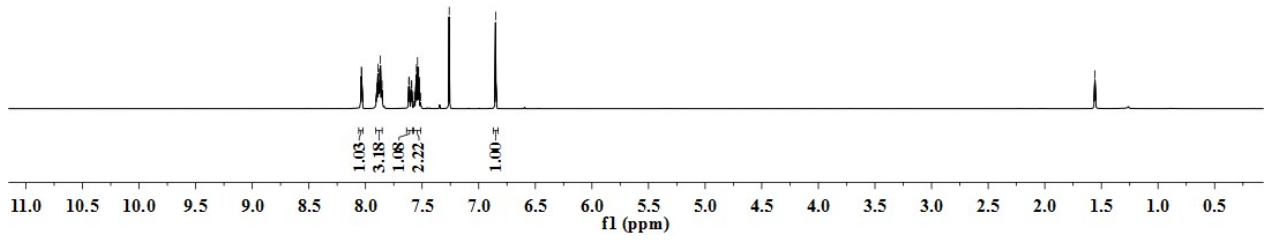

LSW-NAI-Cl-I

134.95  
 134.22  
 133.47  
 132.59  
 129.09  
 128.45  
 128.14  
 127.80  
 127.24  
 126.65  
 125.86  
 -73.28

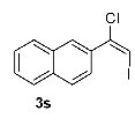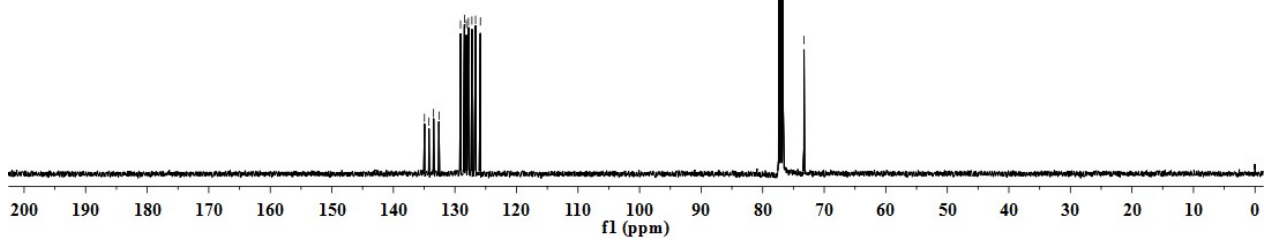

LSW-10-B-FUNAN-CI-I

7.67  
7.65  
7.58  
7.56  
7.43  
7.41  
7.40  
7.39  
7.32  
7.30  
7.29  
6.95

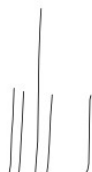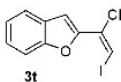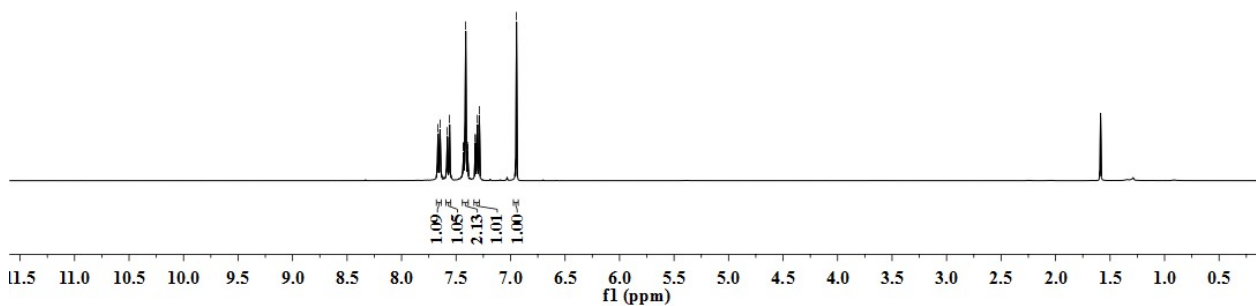

LSW-FUNAN-CL-I

154.77  
150.20  
127.55  
126.16  
124.20  
123.52  
121.82  
111.66  
110.38  
71.67

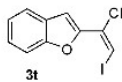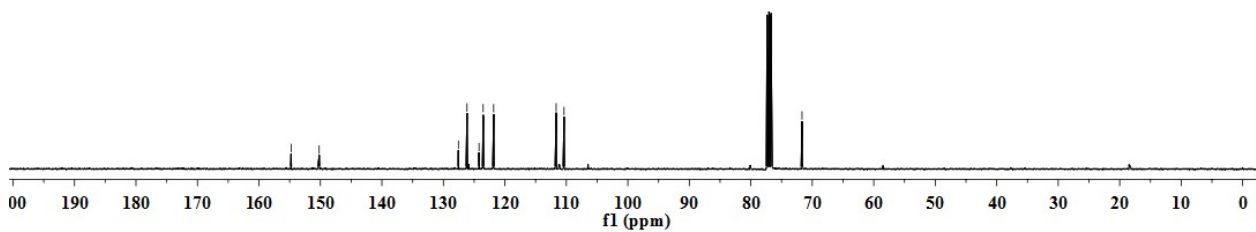

1sw-benbingsaifen

7.93  
7.83  
7.83  
7.82  
7.81  
7.44  
7.43  
7.42  
7.41  
7.41  
7.40  
7.40  
7.39  
7.39  
7.37  
7.26  
6.93

-1.55

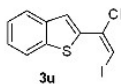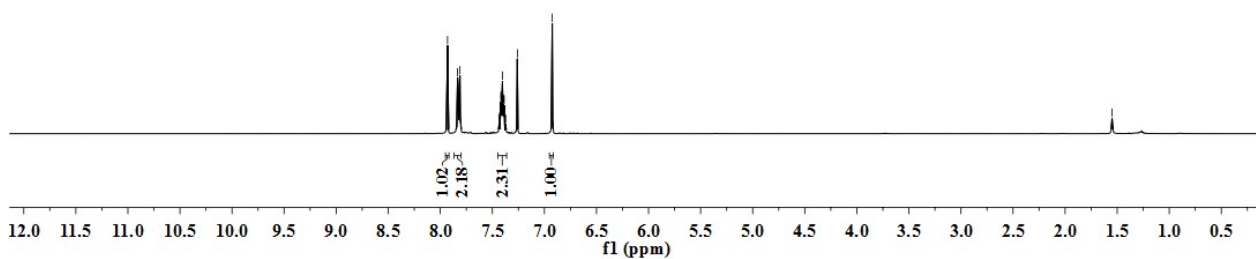

LSW-BBS-Cl-I

140.47  
138.25  
138.14  
128.39  
128.12  
125.93  
124.86  
124.51  
122.11

-72.74

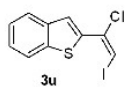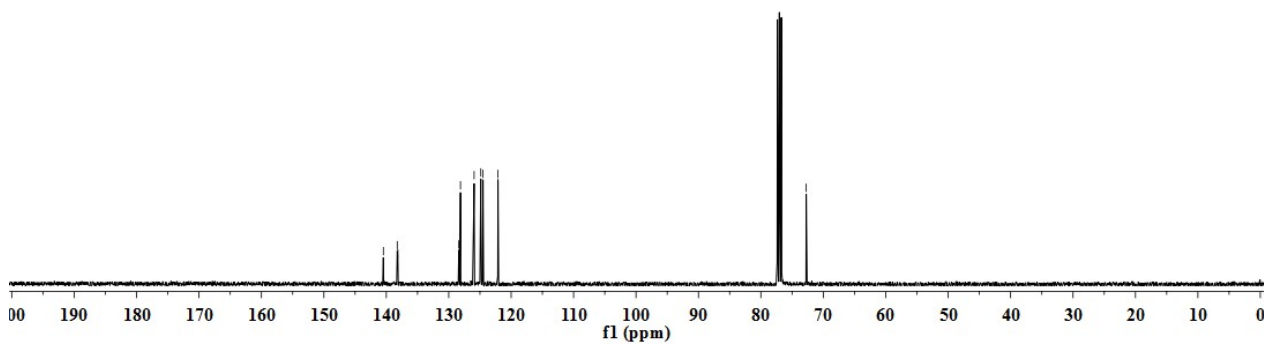

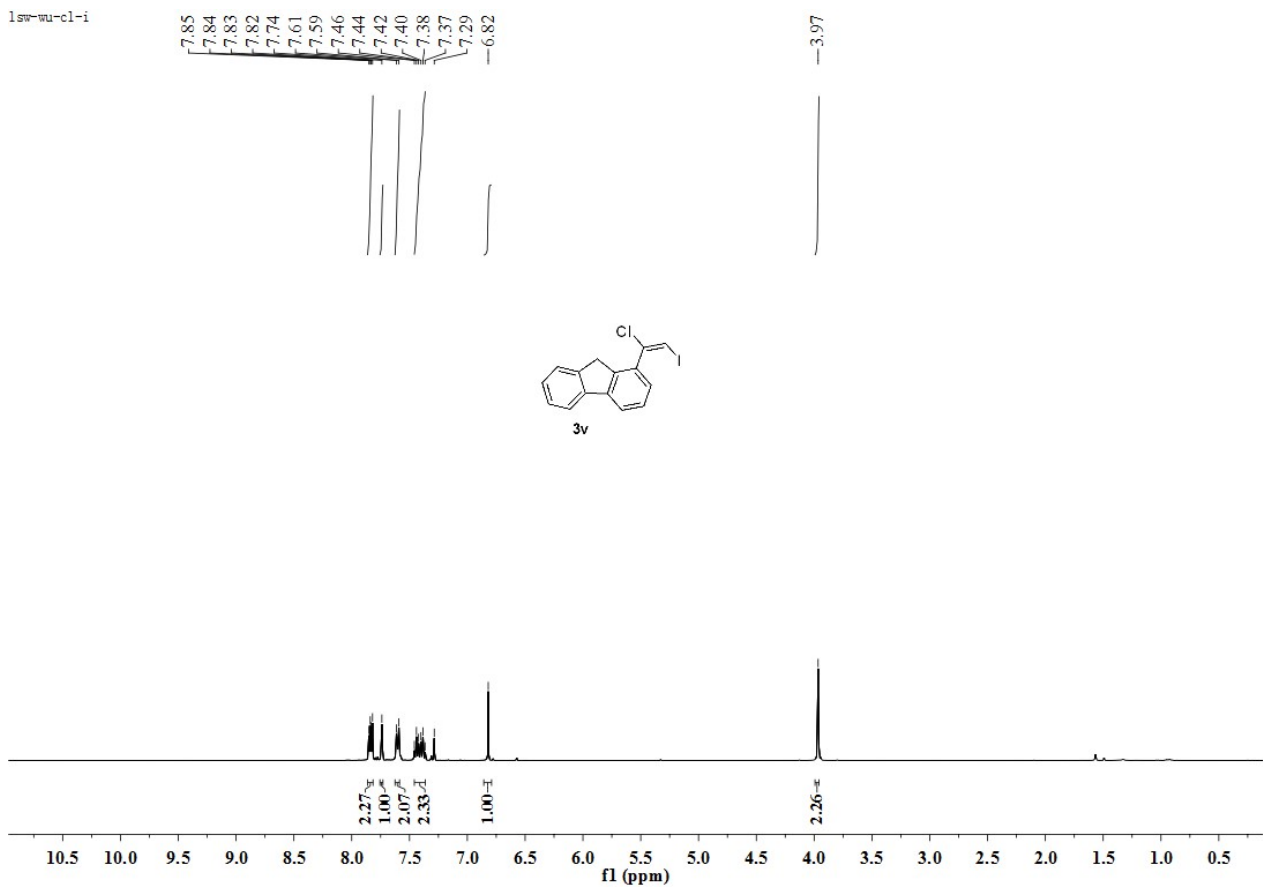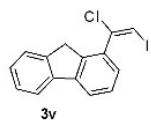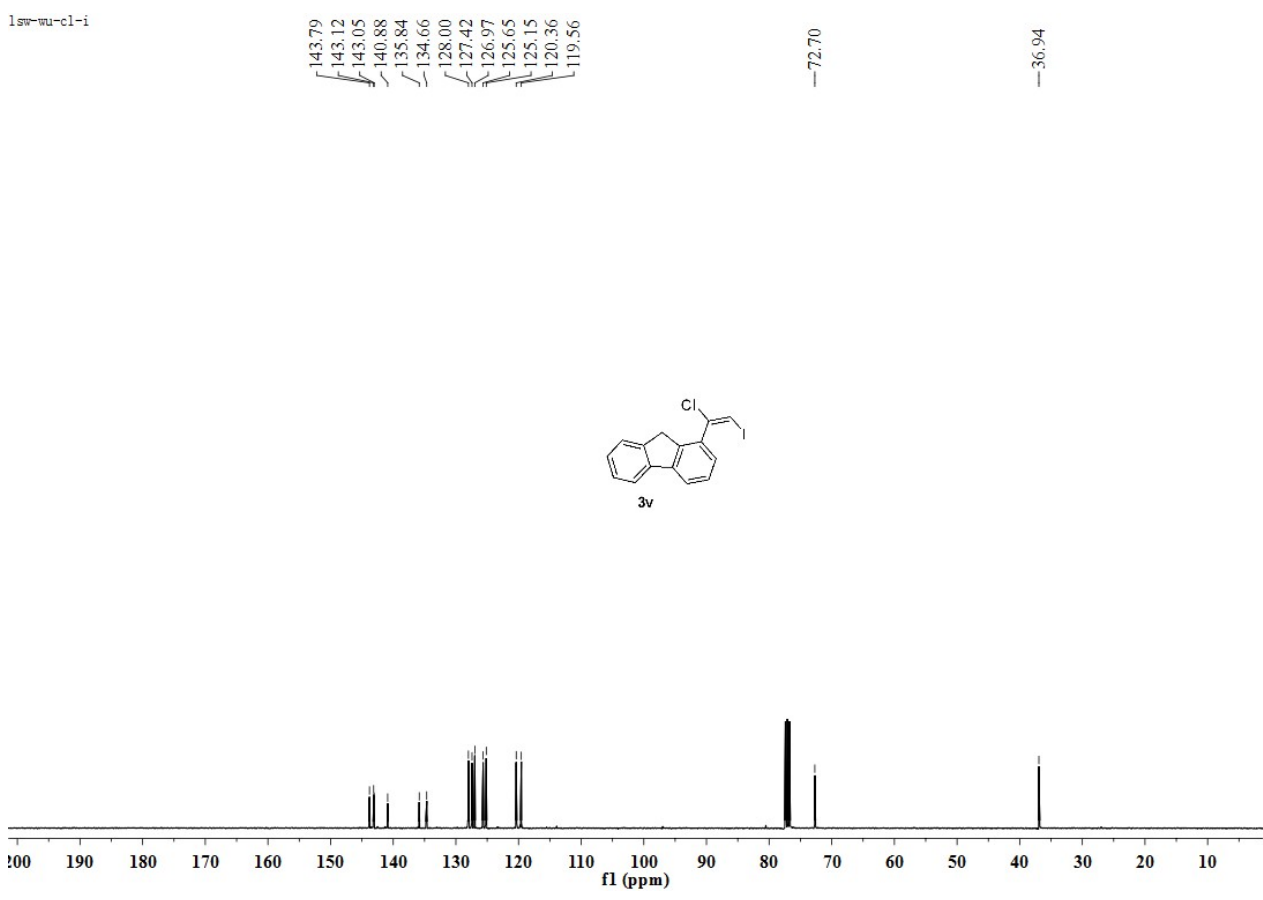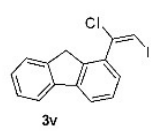



LSW-QUE-ME-CL-I

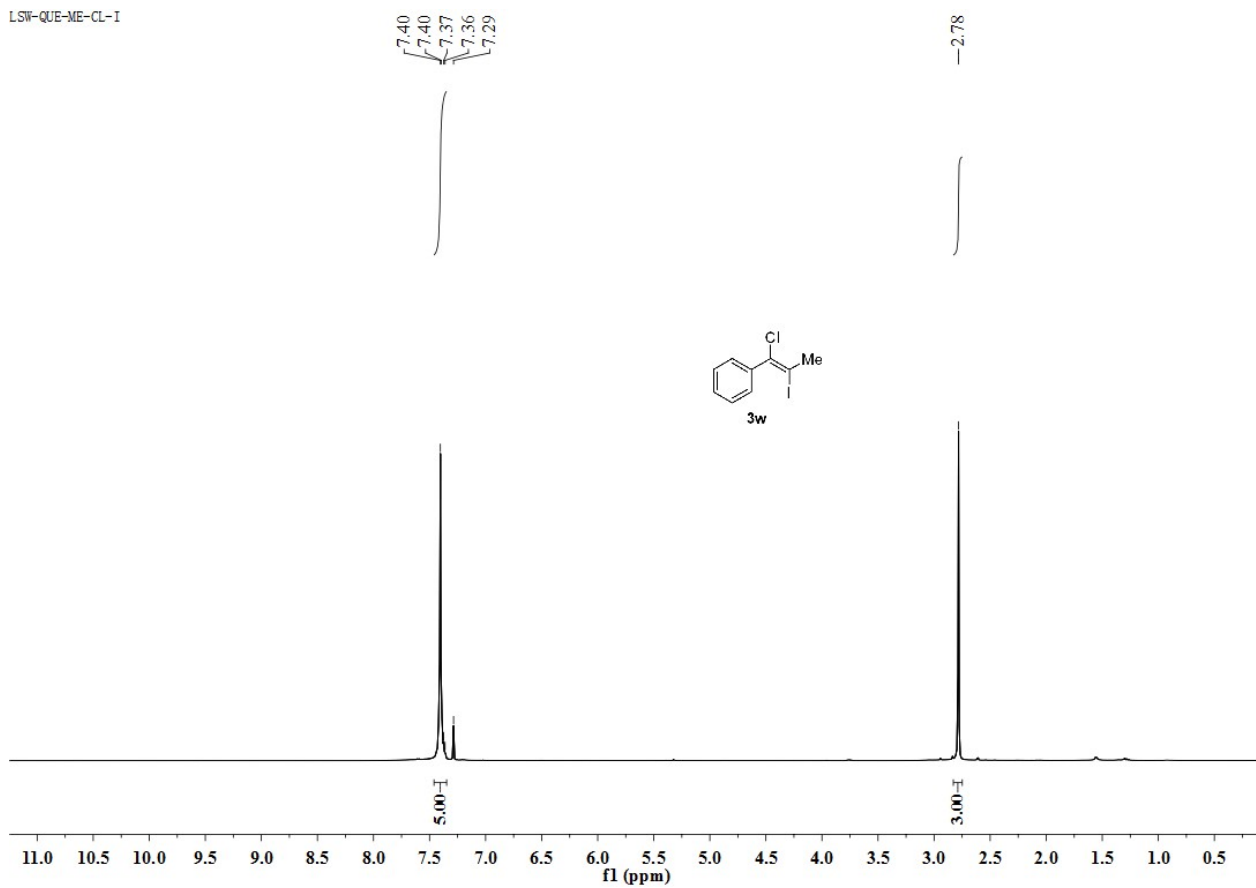

LSW-QUE-ME-CL-I

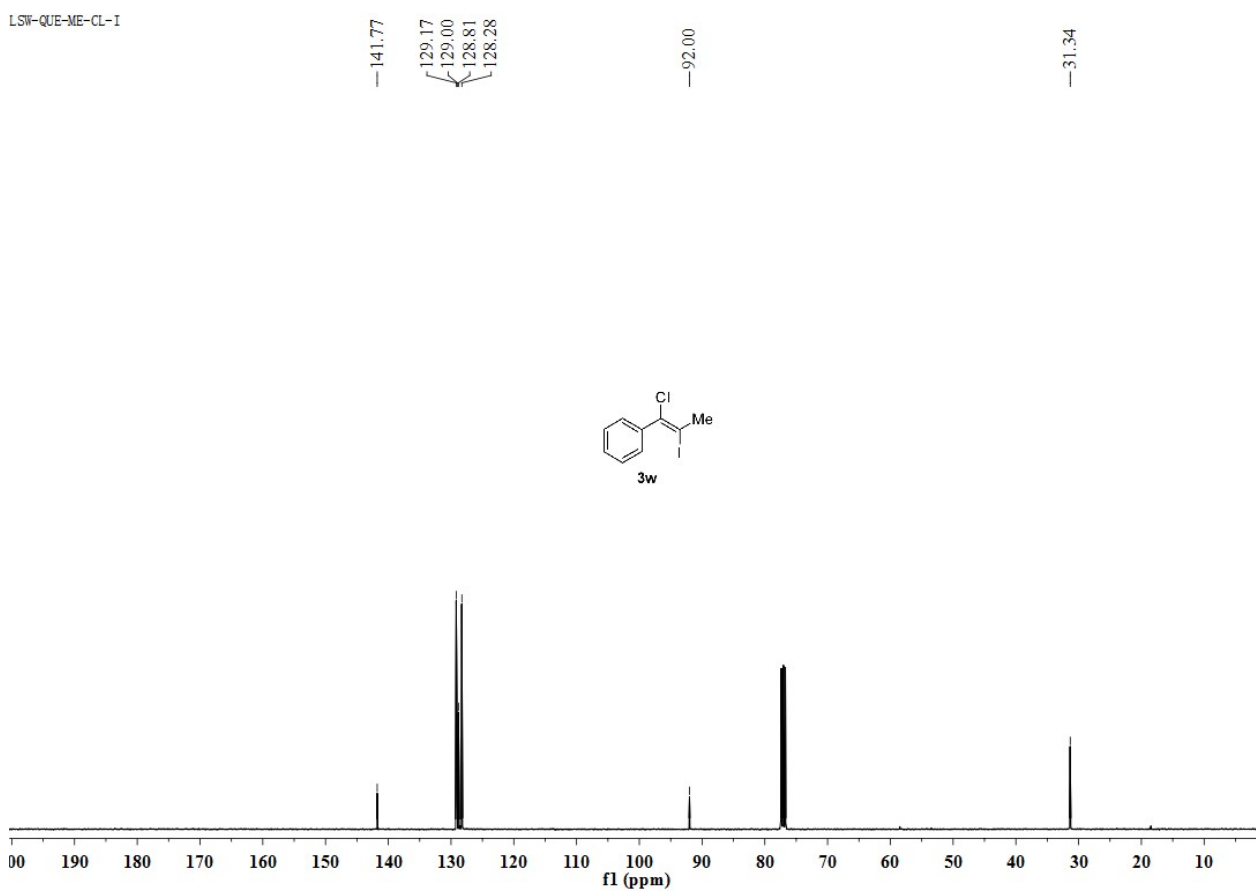

3x-05

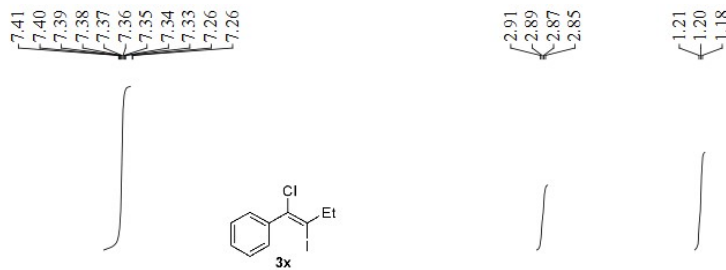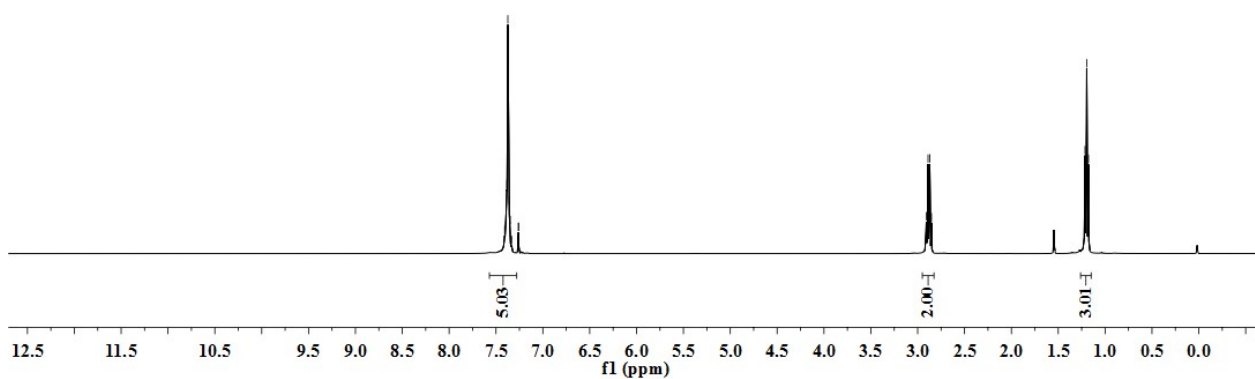

3x-05

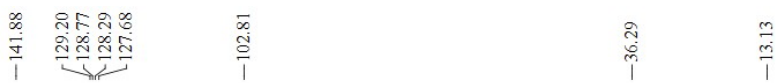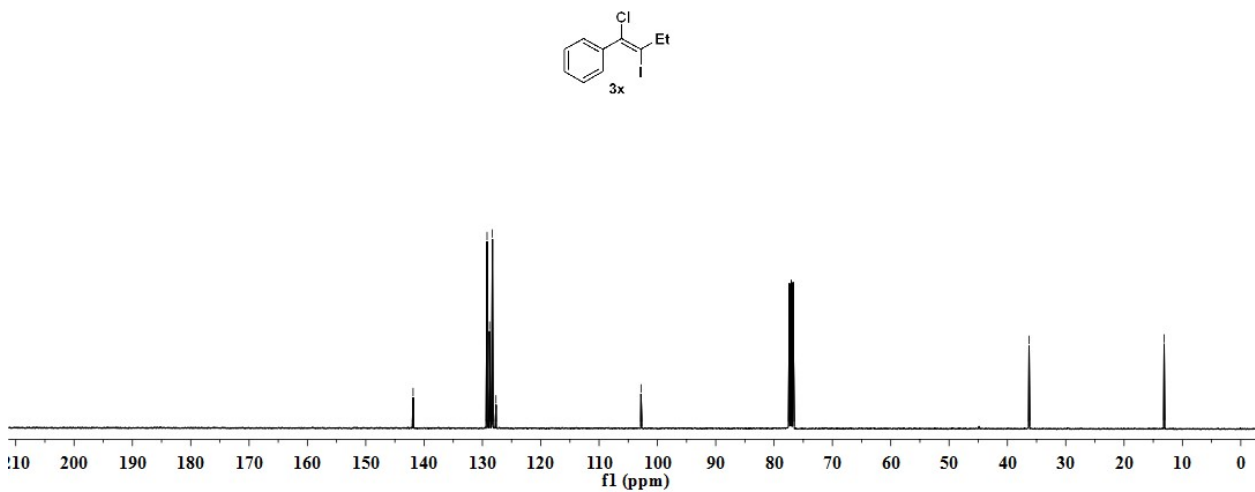

LSW-QUE-BING-CL-I

7.39  
7.38  
7.37  
7.37  
7.35  
7.26

2.87  
2.86  
2.85  
2.85  
2.83  
2.82  
1.72  
1.71  
1.70  
1.69  
1.07  
1.05  
1.04  
1.03

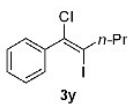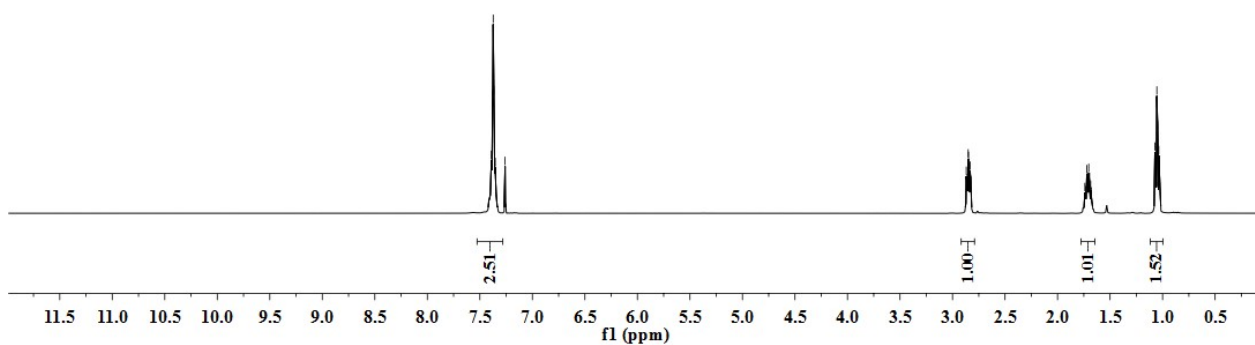

LSW-QUEBING-CL-I

142.08

129.18  
128.75  
128.47  
128.30

101.33

43.89

21.92

12.93

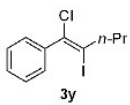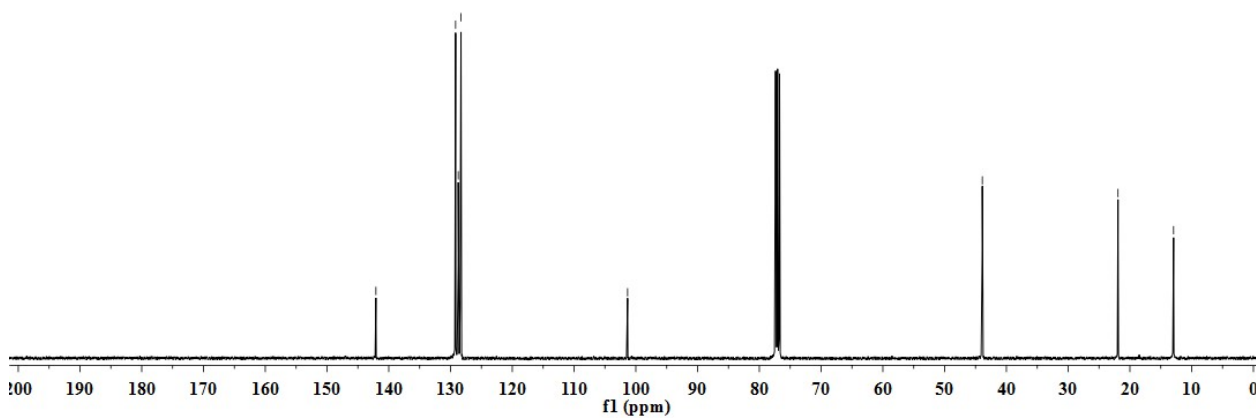

LSW-QUE-CH2OH

7.42  
7.40  
7.39  
7.37  
7.26

4.63  
4.61

2.17  
2.15  
2.14

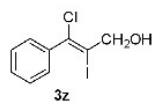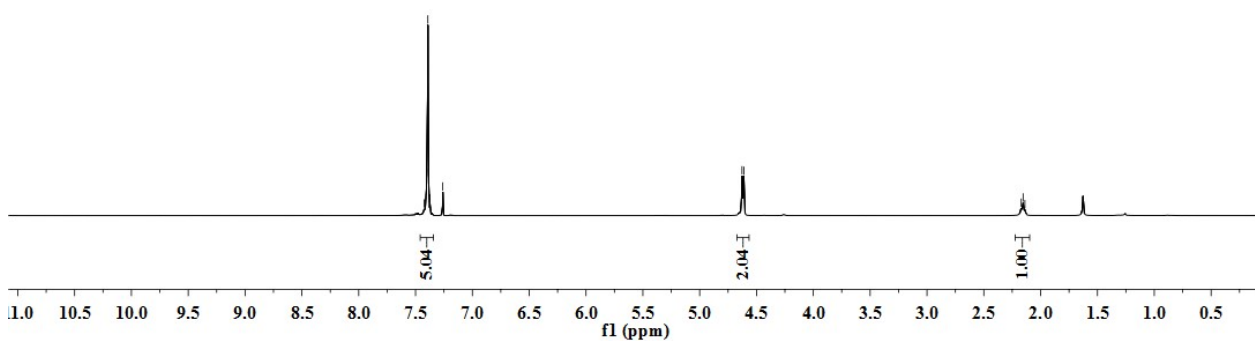

LSW-QUE-CH2OH-CL-I-1

140.88  
130.39  
129.27  
128.92  
128.41

101.36

67.80

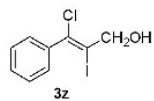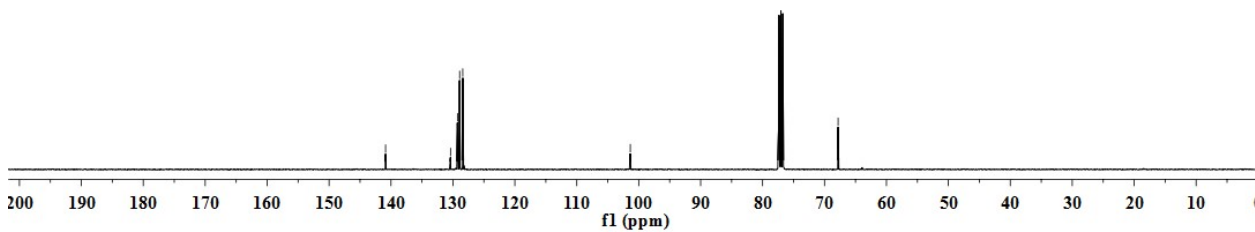

LSW-2PH

7.55  
7.54  
7.53  
7.49  
7.47  
7.45  
7.43  
7.42  
7.41  
7.40  
7.39  
7.38  
7.34  
7.32  
7.30  
7.26

-1.56

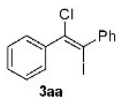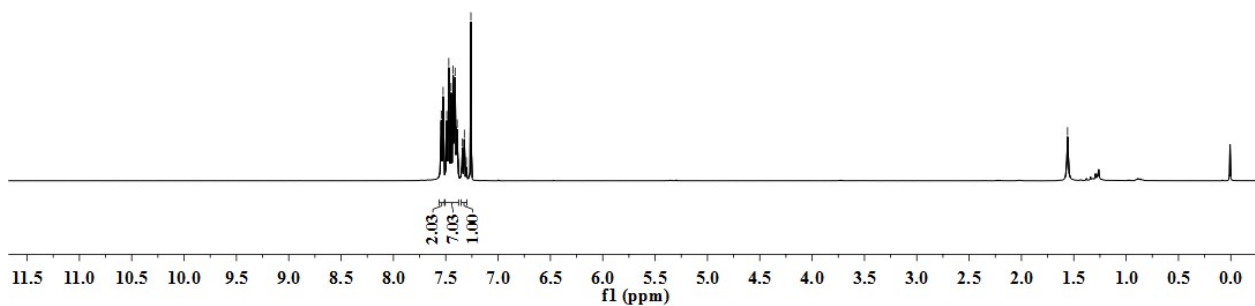

LSW-QMS-CL-1-

7.42  
7.40  
7.31  
7.29  
7.26

3.63  
3.62  
3.60  
3.17  
1.93  
1.93  
1.91  
1.91  
1.90  
1.89  
1.88  
1.86  
1.85  
1.83  
1.82  
1.81  
1.80  
1.79  
1.57

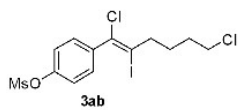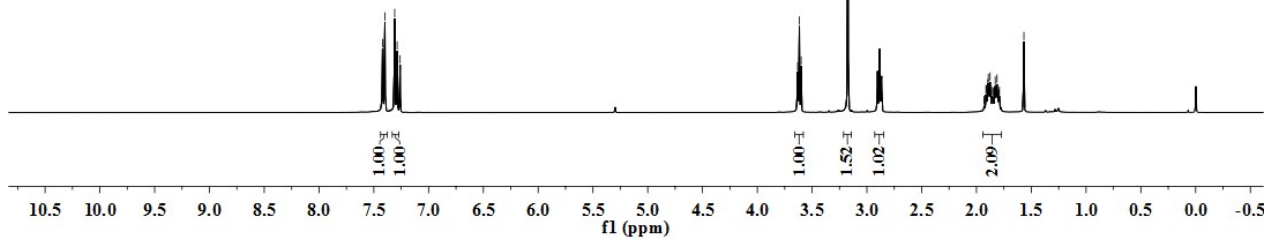

LSW-CMS-2

— 149.10

— 140.82

— 131.14

— 127.44

— 121.95

— 101.36

— 44.65

— 41.34

— 37.62

— 31.20

— 25.77

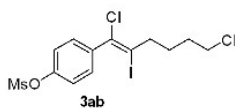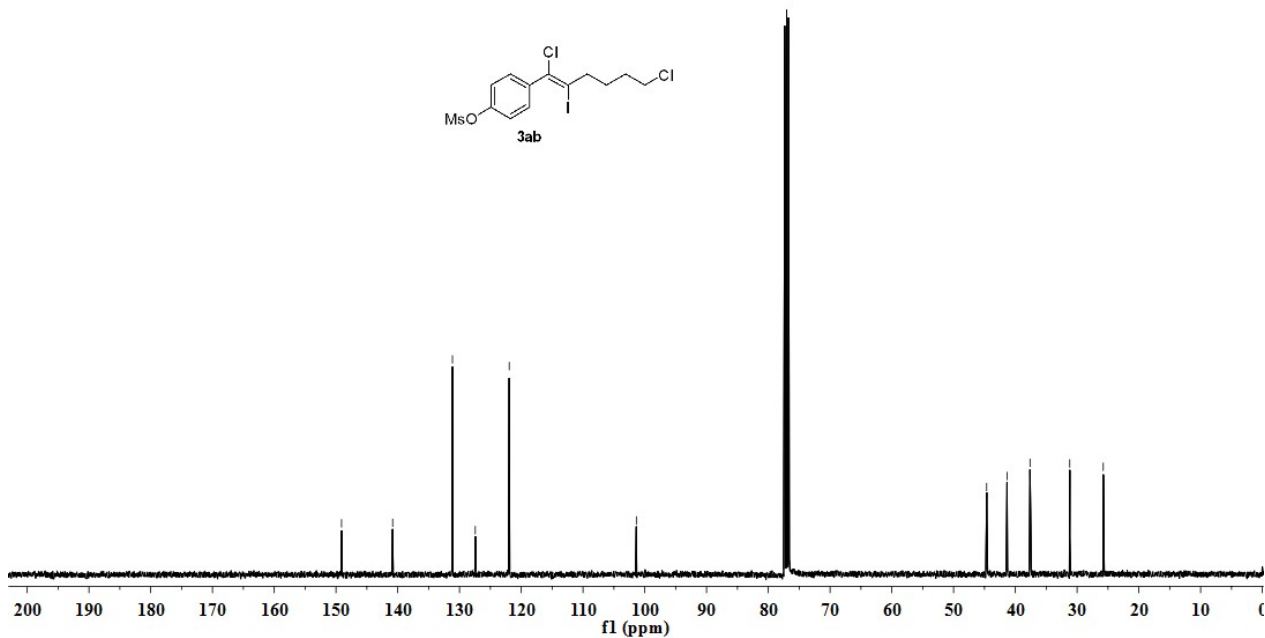

8.00  
8.00  
7.87  
7.87  
7.81  
7.65  
7.62  
7.54  
7.54  
7.36  
7.35  
7.33  
7.31  
7.30  
7.29  
7.29  
7.28  
7.27  
6.69  
6.69  
6.68

2.95  
2.93  
2.91  
2.79  
2.77  
2.75  
2.39  
2.07  
2.05  
2.05  
2.03  
2.03  
2.02  
2.01

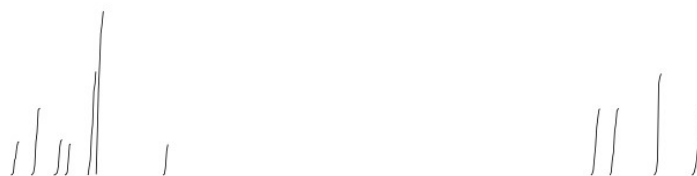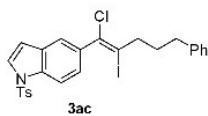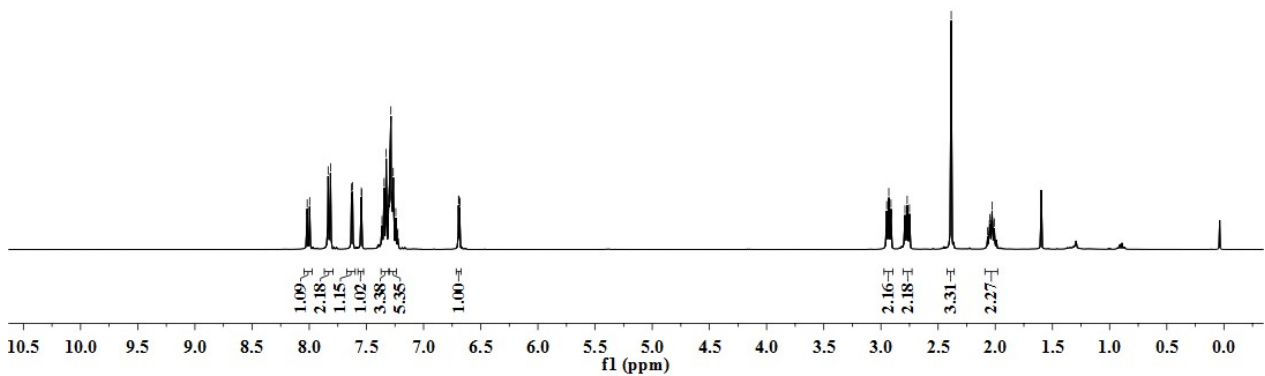

LSW-INDOLE

145.19  
141.74  
137.07  
135.29  
134.49  
130.38  
130.02  
128.79  
128.45  
128.41  
127.13  
126.93  
125.97  
125.73  
122.45  
113.39  
109.02  
101.20

41.98  
34.73  
30.18  
21.62

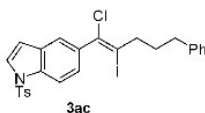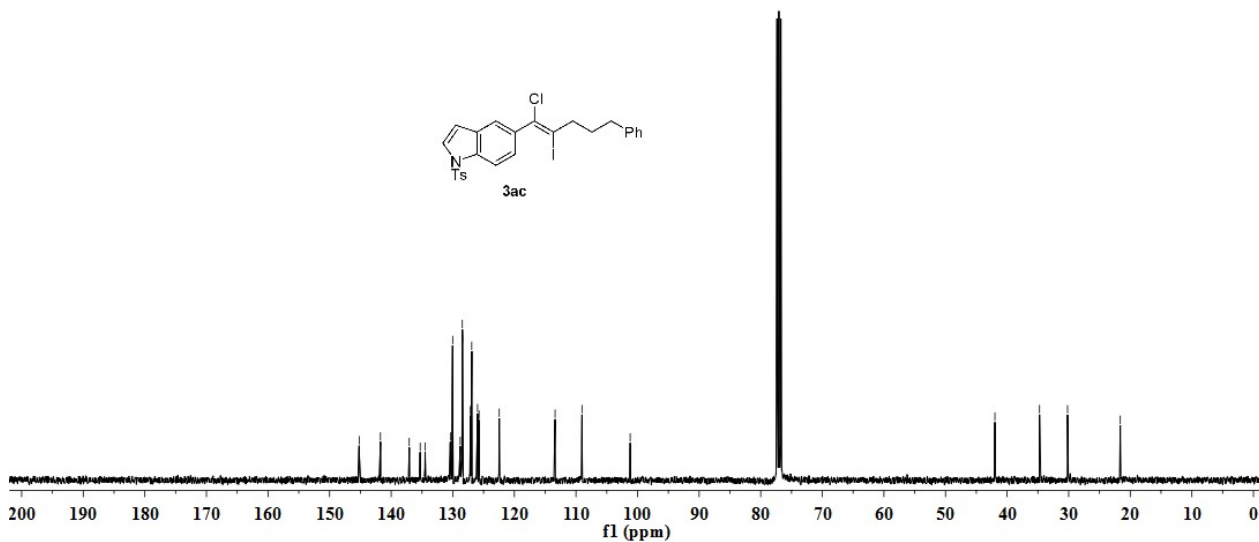

3ad-LSW-AC-2

7.50  
7.49  
7.48  
7.47  
7.43  
7.43  
7.42  
7.41  
7.26

2.57

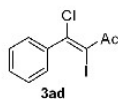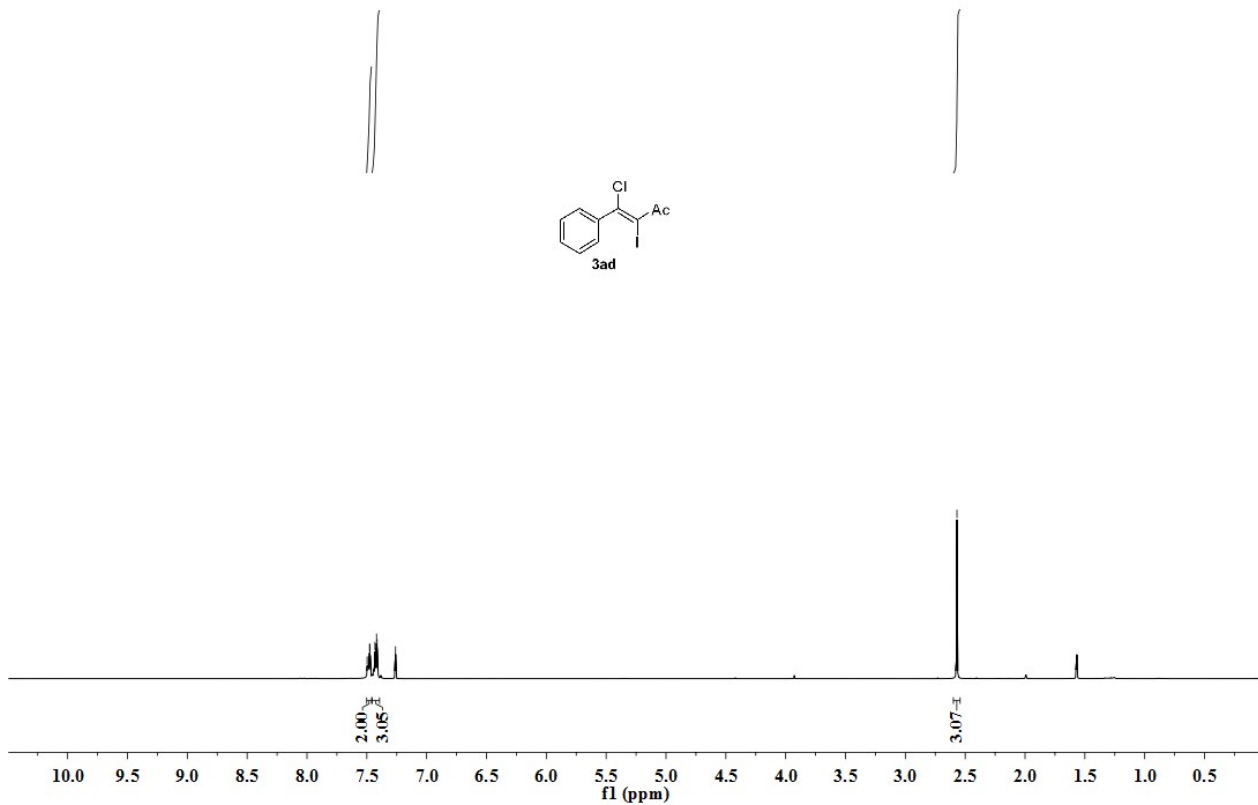

LSW-023  
—198.04

—138.45  
—131.11  
—129.87  
—128.89  
—128.45

—92.26

—27.36

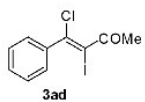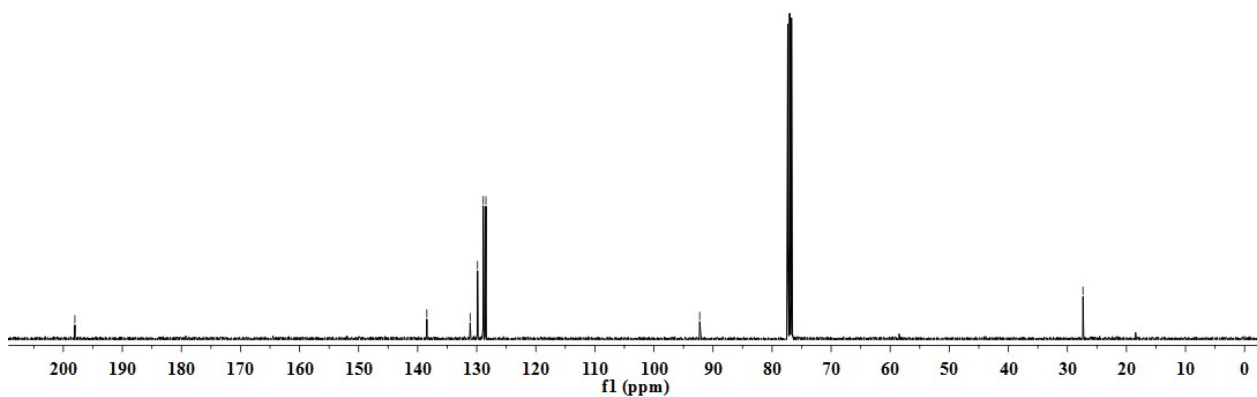

LSW-QUE-CHO

—9.44

7.54  
7.54  
7.53  
7.52  
7.48  
7.47  
7.47  
7.46  
7.26

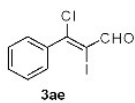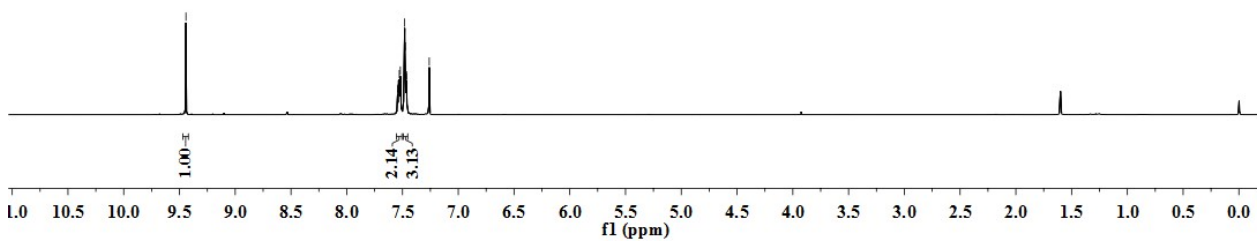



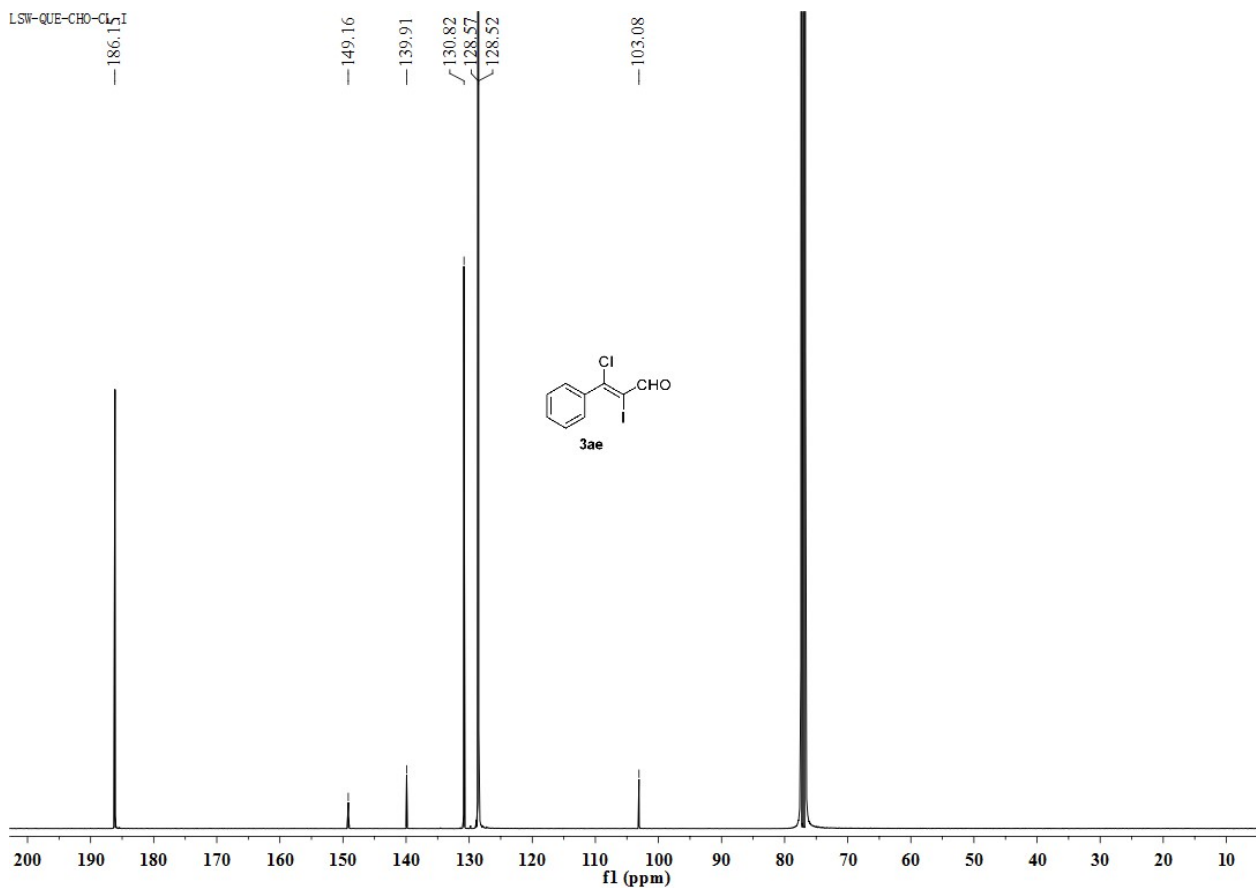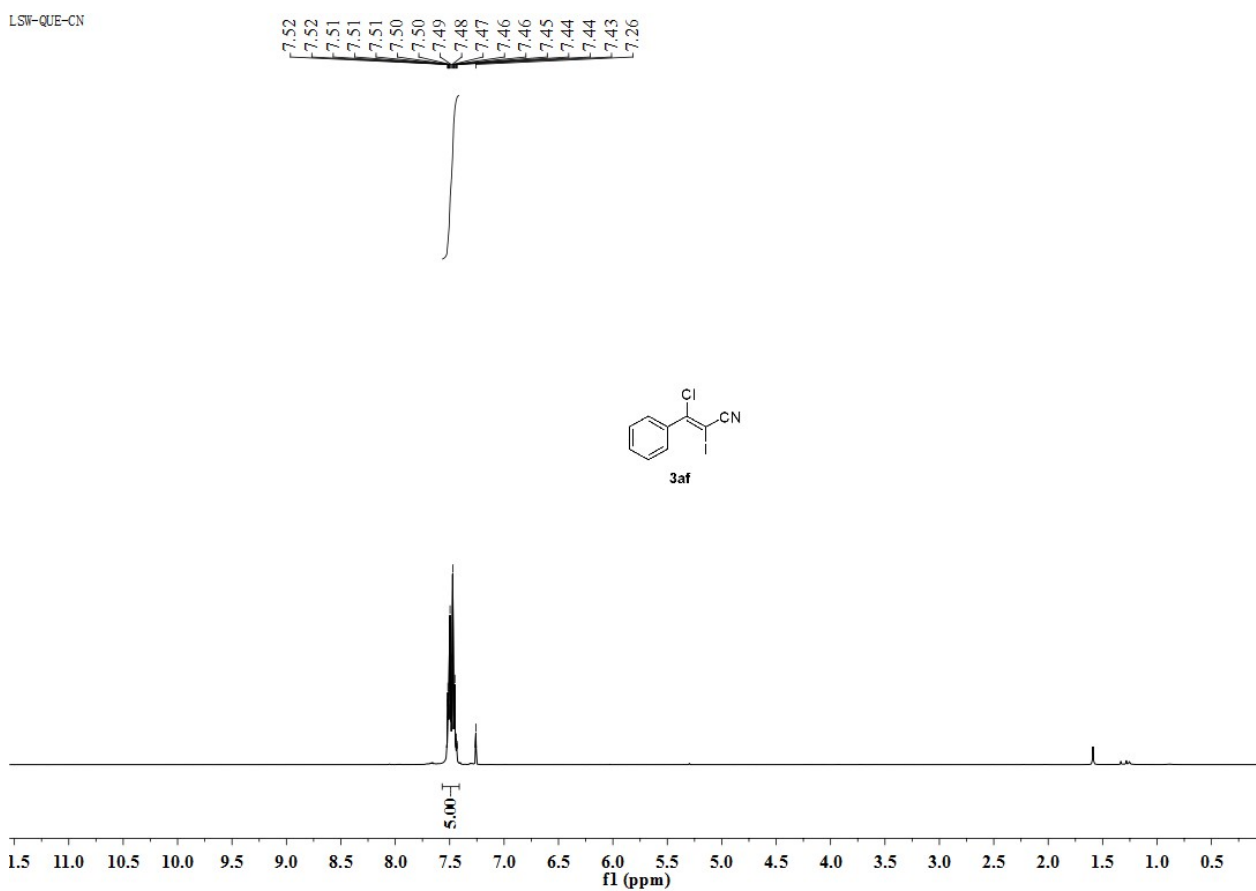

LSW-QUE-CN

—148.97  
/136.90  
/131.27  
/128.68  
/128.65  
—116.73

—52.56

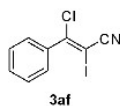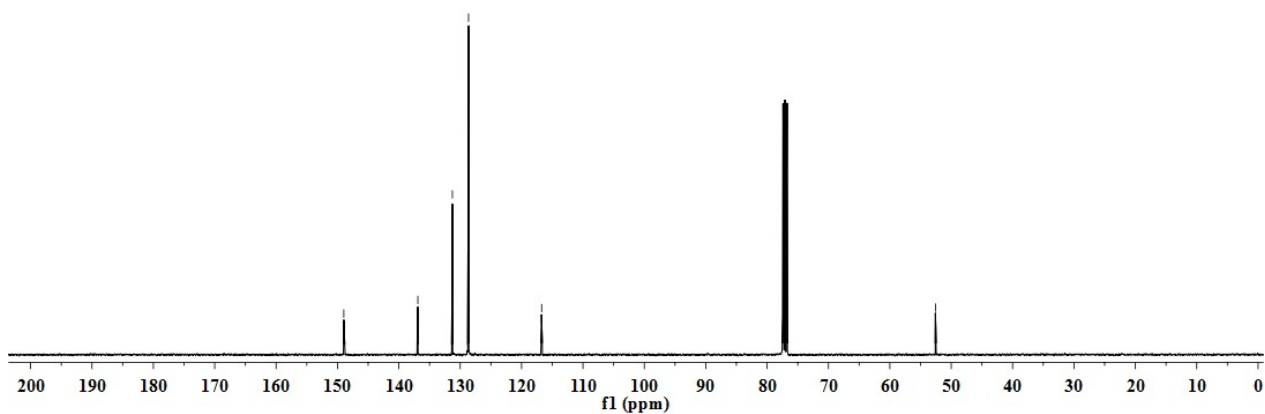

7.35  
7.27  
7.26  
2.97  
2.96  
2.94  
2.94  
2.55  
2.53  
2.50  
2.48  
2.45  
2.44  
2.42  
2.41  
2.33  
2.32  
2.20  
2.18  
2.16  
2.13  
2.11  
2.11  
2.09  
2.08  
2.07  
2.06  
2.06  
2.05  
2.04  
2.03  
2.03  
2.00  
1.99  
1.97  
1.97  
1.96  
1.67  
1.66  
1.65  
1.64  
1.63  
1.62  
1.61  
1.60  
1.59  
1.56  
1.56  
1.55  
1.53  
1.52  
1.50  
1.49  
1.48  
1.48  
1.47  
1.45  
1.45

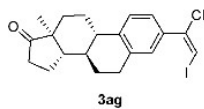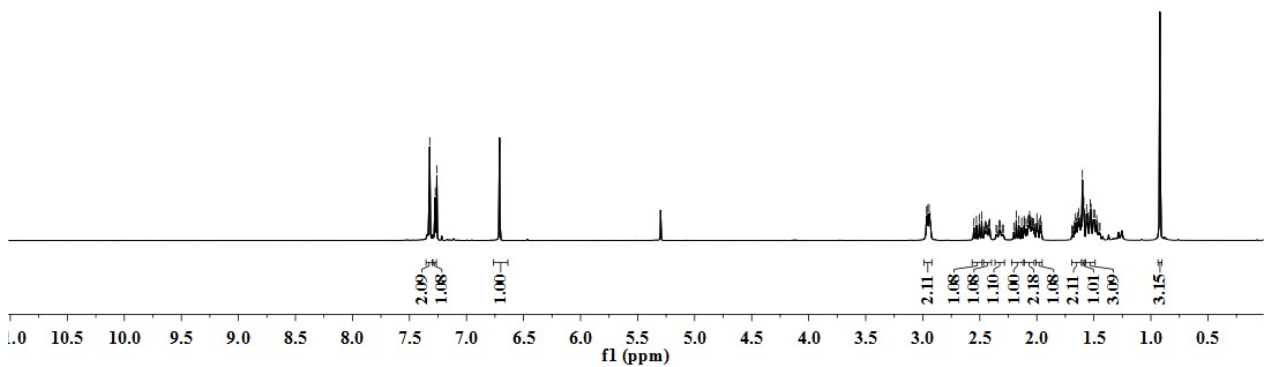

LSW-CIFENTONG-L-I

141.41  
136.59  
134.99  
134.16  
129.42  
126.36  
125.22

72.15

50.54  
47.95  
44.51  
37.89  
35.85  
31.58  
29.28  
26.37  
25.56  
21.61  
13.86

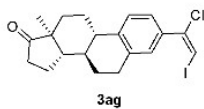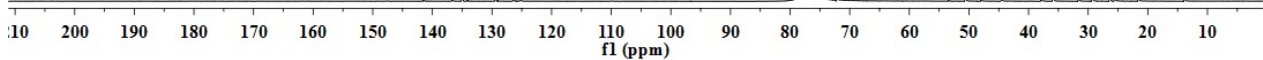

LSW-BOHE-CL-I

8.24  
8.10  
8.10  
8.08  
8.08  
7.75  
7.74  
7.74  
7.73  
7.72  
7.53  
7.52  
7.50  
7.29  
6.86

5.01  
4.99  
4.98  
4.97  
4.95  
4.94

2.17  
2.14  
2.01  
2.00  
2.00  
1.98  
1.98  
1.78  
1.75  
1.63  
1.62  
1.60  
1.60  
1.59  
1.57  
1.57

1.15  
0.97  
0.96  
0.95  
0.94  
0.83

// // //

/

// // //

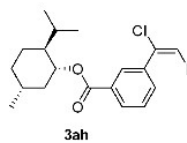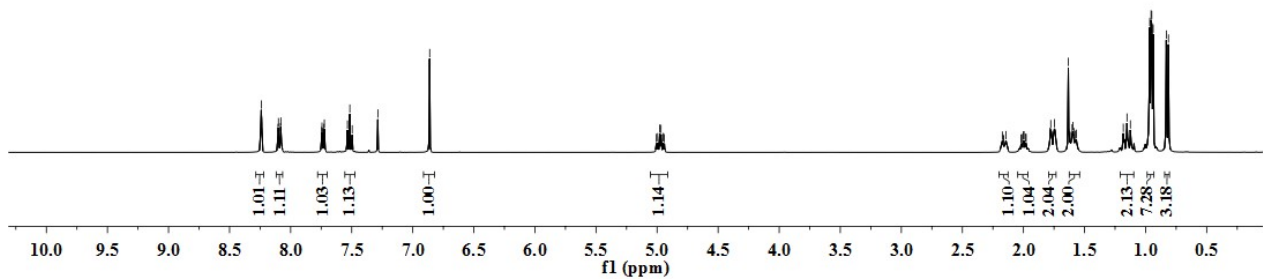

LSW-BOHE-CL-1-3

165.27

137.89  
133.13  
131.10  
130.54  
130.27  
128.43

75.28  
73.90

47.26  
40.95  
34.31  
31.47  
26.53  
23.65  
22.05  
20.81  
16.56

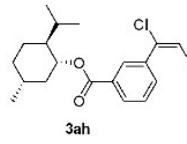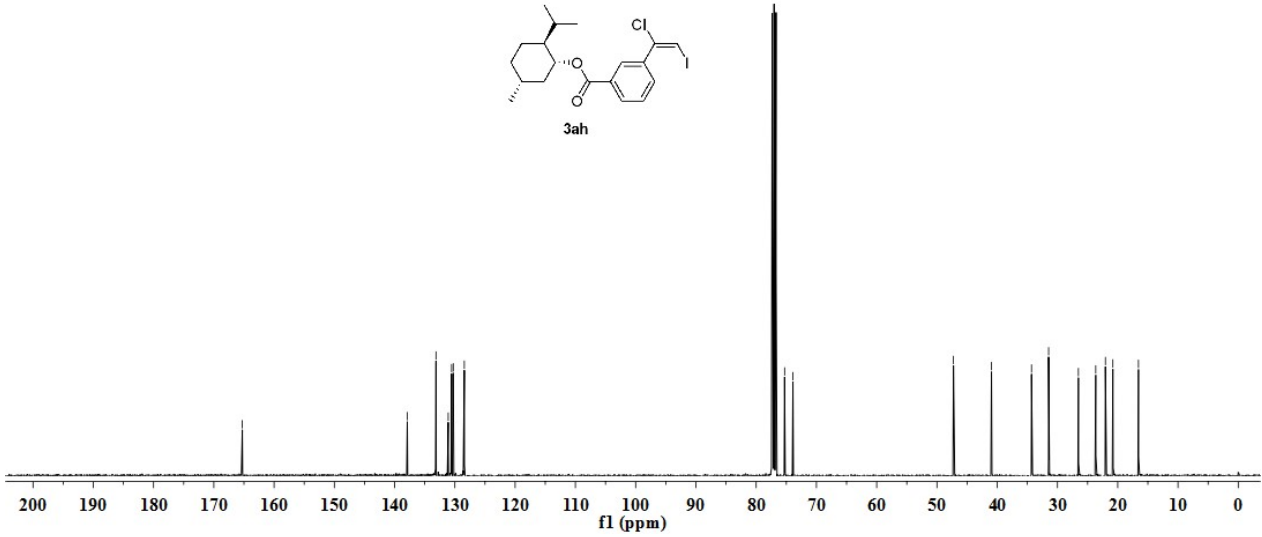

LSW-TANG-Q

8.08  
8.08  
8.08  
7.96  
7.96  
7.95  
7.94  
7.94  
7.93  
7.66  
7.65  
7.65  
7.64  
7.63  
7.63  
7.44  
7.42  
7.40  
7.16  
-6.75

5.86  
5.85  
5.40  
5.40

4.55  
4.54  
4.30  
4.29  
4.28  
4.26  
4.24  
4.23  
4.22  
4.21  
4.05  
4.04  
4.03  
4.02  
4.00  
3.99  
3.98  
1.56  
1.46  
1.31  
1.22  
1.17

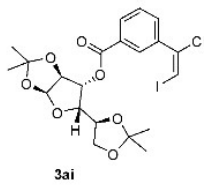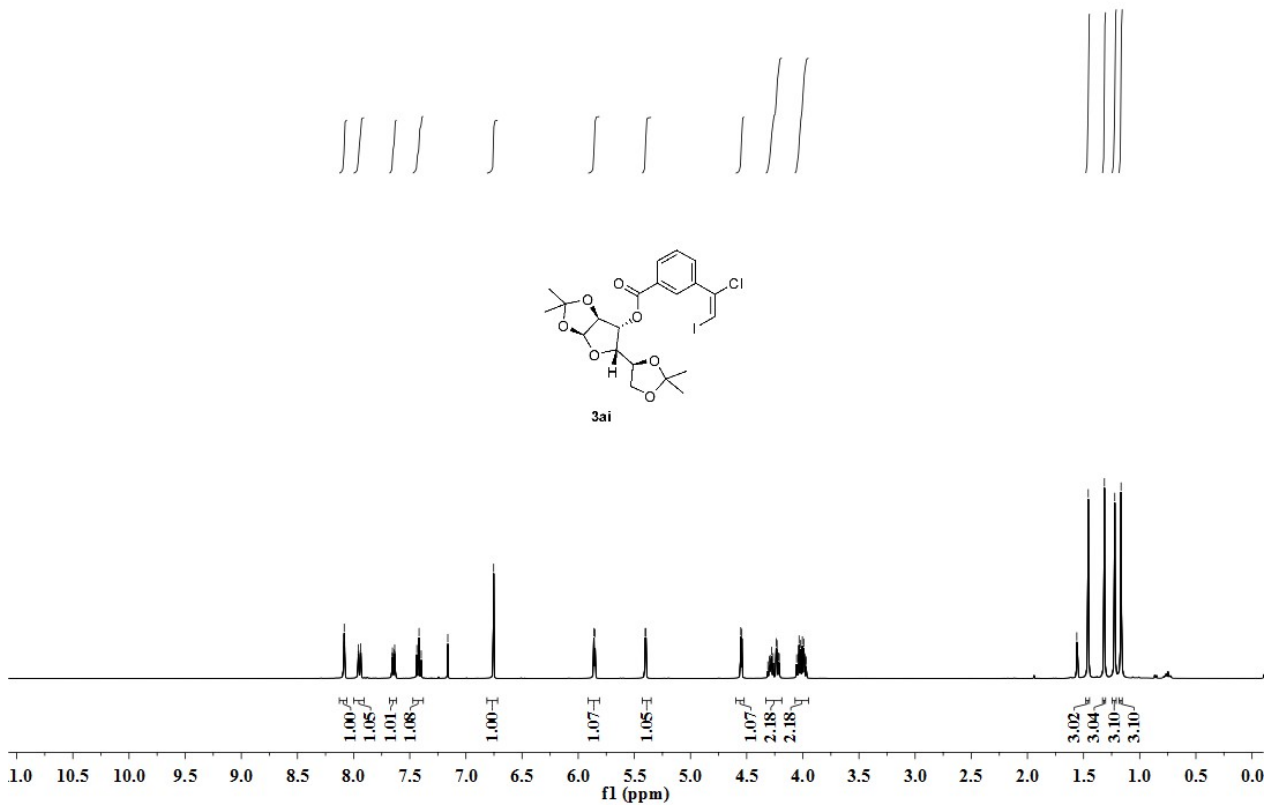

LSW-TANG-CL-1-2

—164.46

138.26  
133.87  
132.78  
130.62  
130.38  
129.82  
128.74

112.43  
109.46  
105.15

83.37  
80.01  
74.38  
72.58  
67.37

26.85  
26.75  
26.23  
25.25

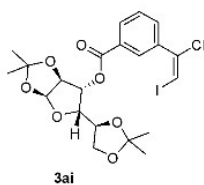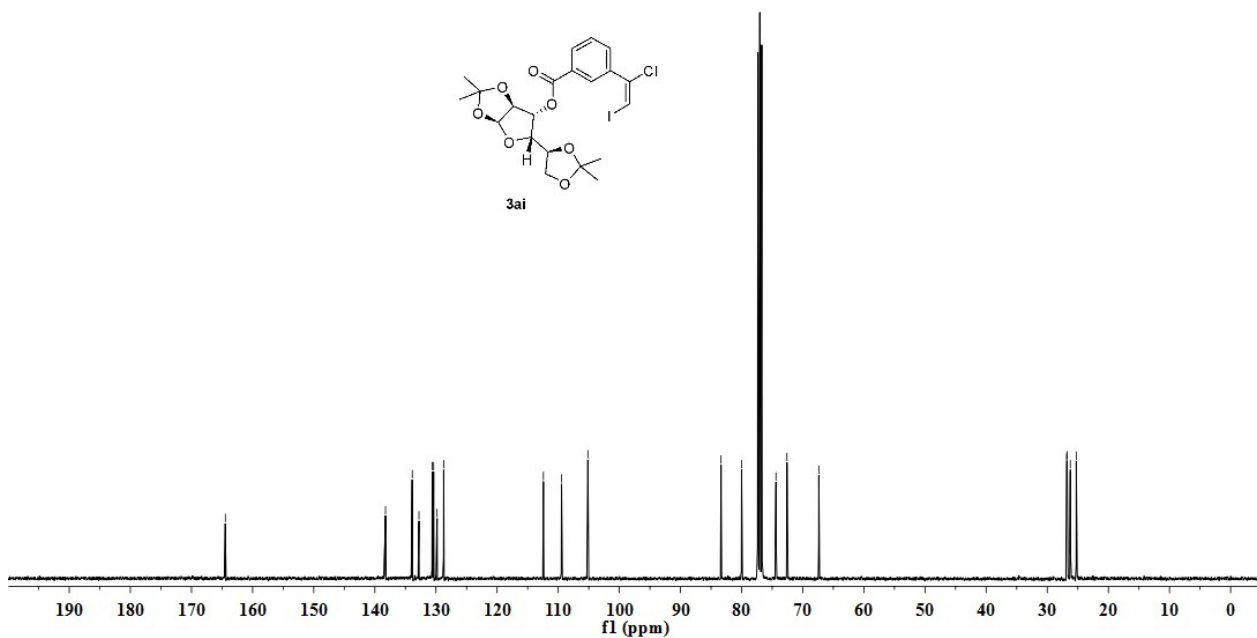

LSW-ZHAZHI-CL-1-2

8.17

8.15

7.55

7.53

7.36

7.31

7.30

7.22

5.14

5.11

5.07

5.04

4.31

3.77

3.75

3.74

3.72

1.56

1.47

1.45

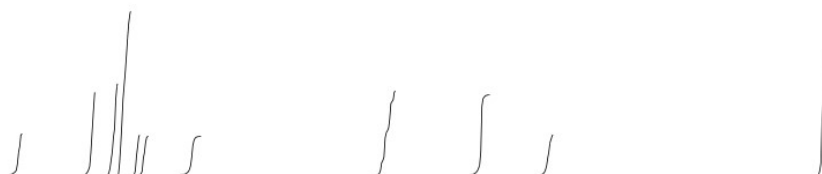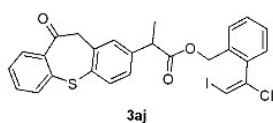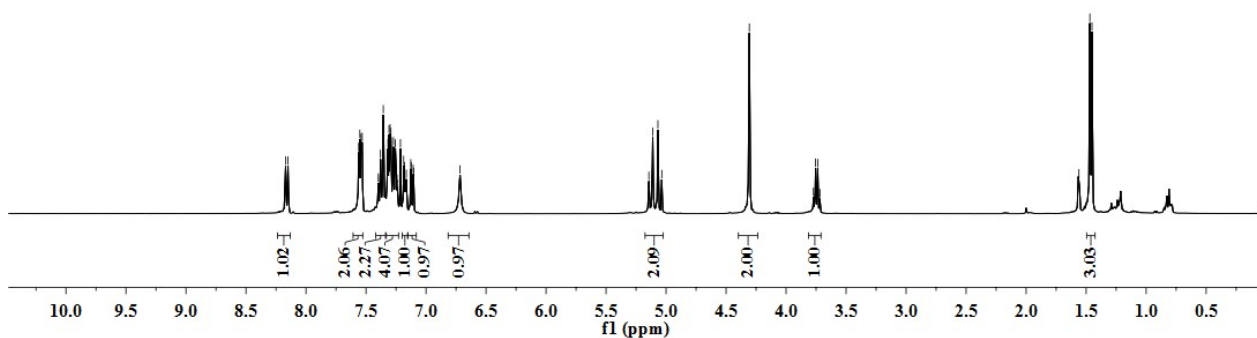

LSW-ZHANG

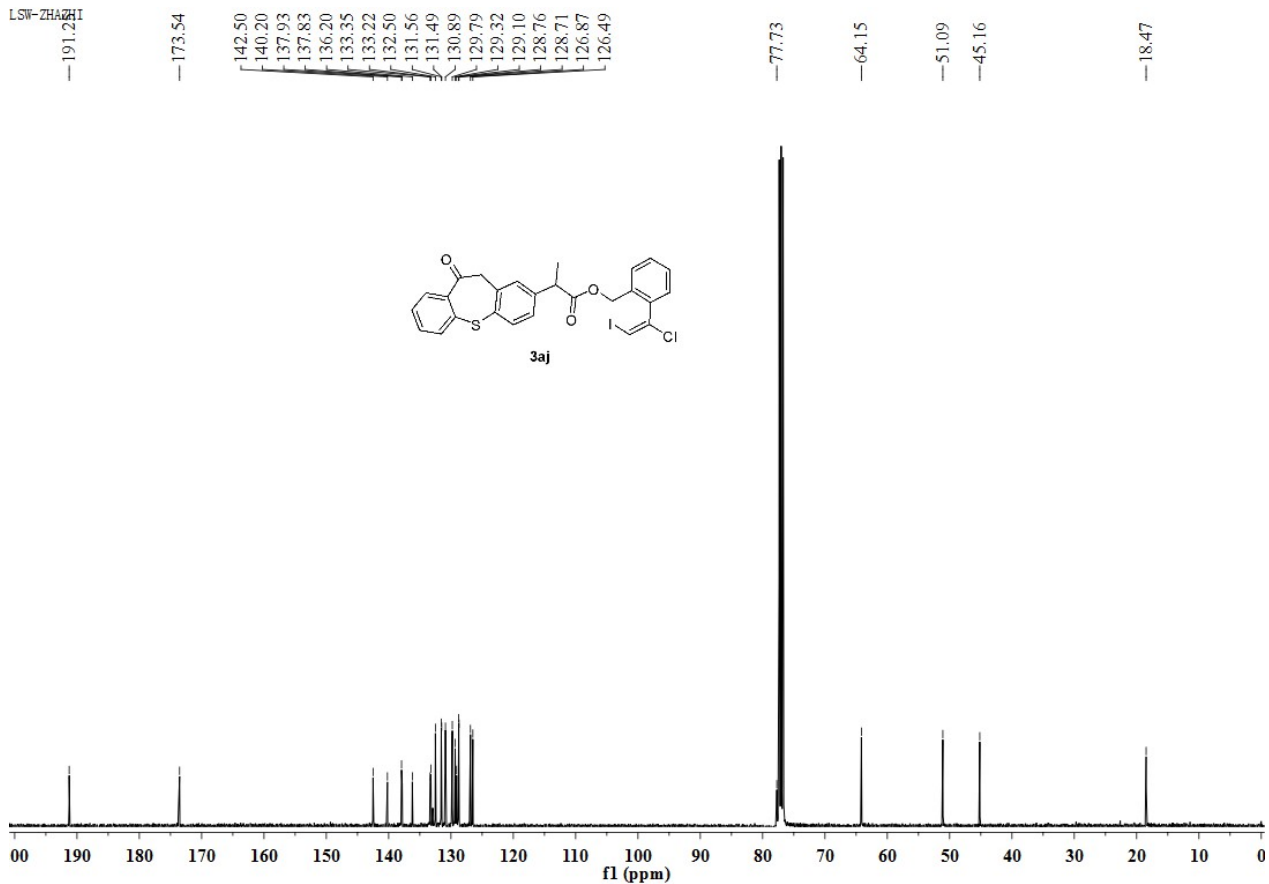

lsw-huanbingji

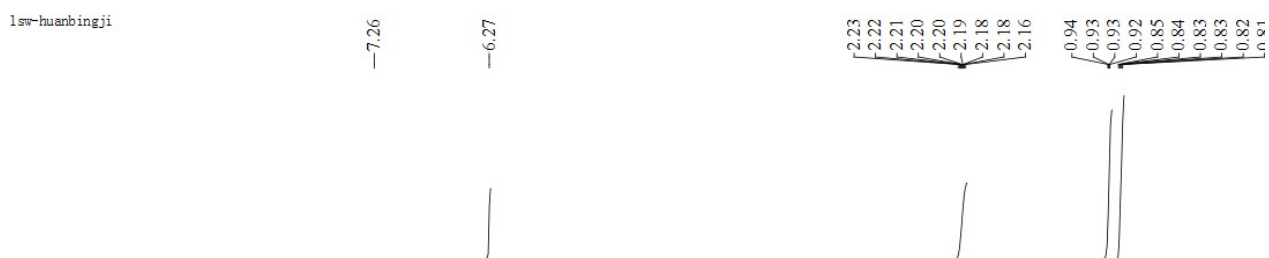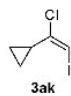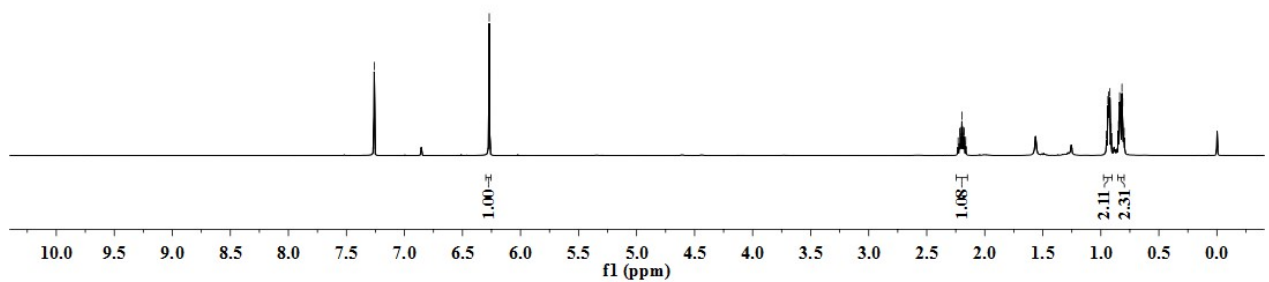

LSW-HUANBINGJI-CL-I

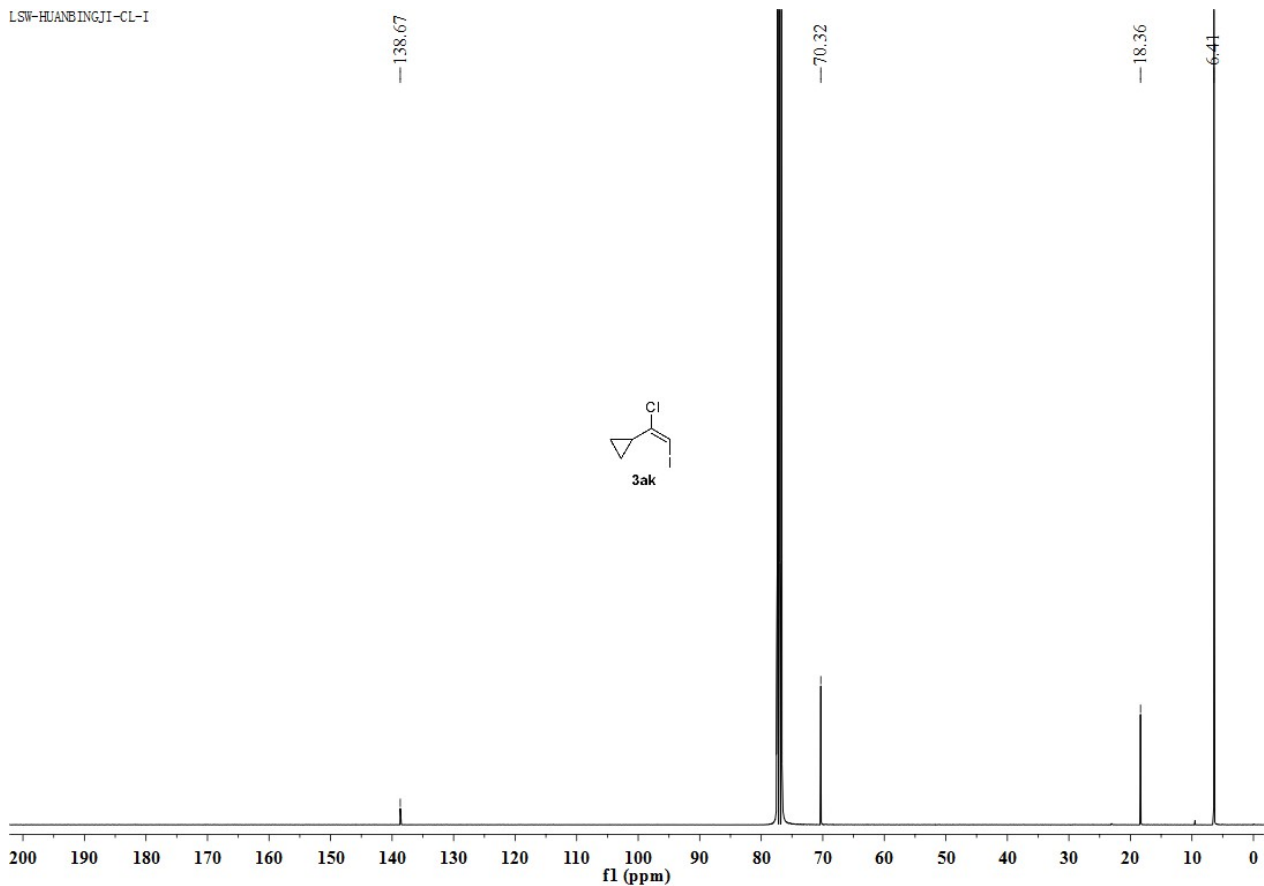

lsw-huanwuji

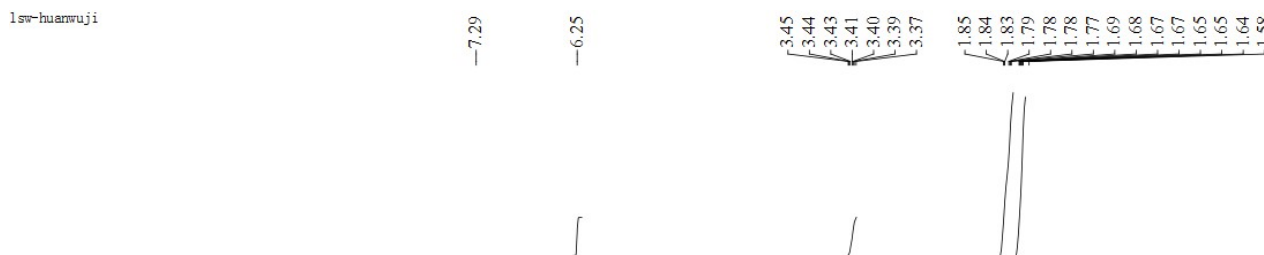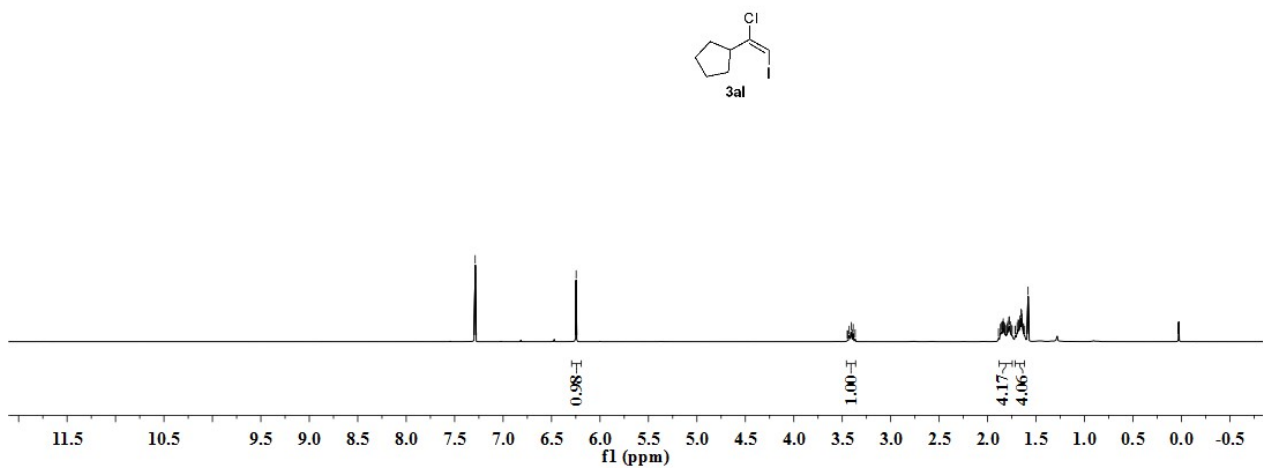

LSW-HUANWUJI-CL-I

142.34

71.04

46.42

30.35  
25.99

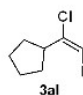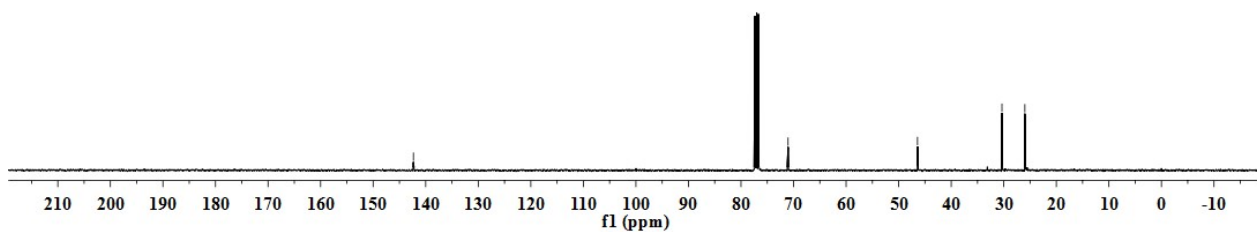

LSW-I-2

7.26  
7.26  
6.92

3.59  
3.57  
3.55

2.72  
2.70  
2.68

2.07  
2.05  
2.03  
2.02  
2.02  
2.00

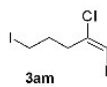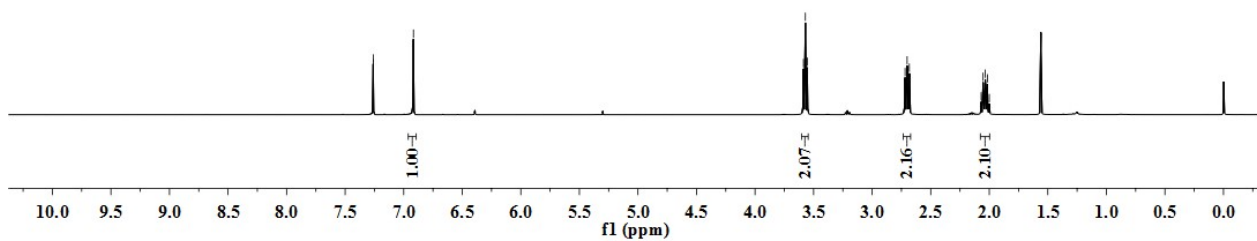



LSW-I-CL-I-2

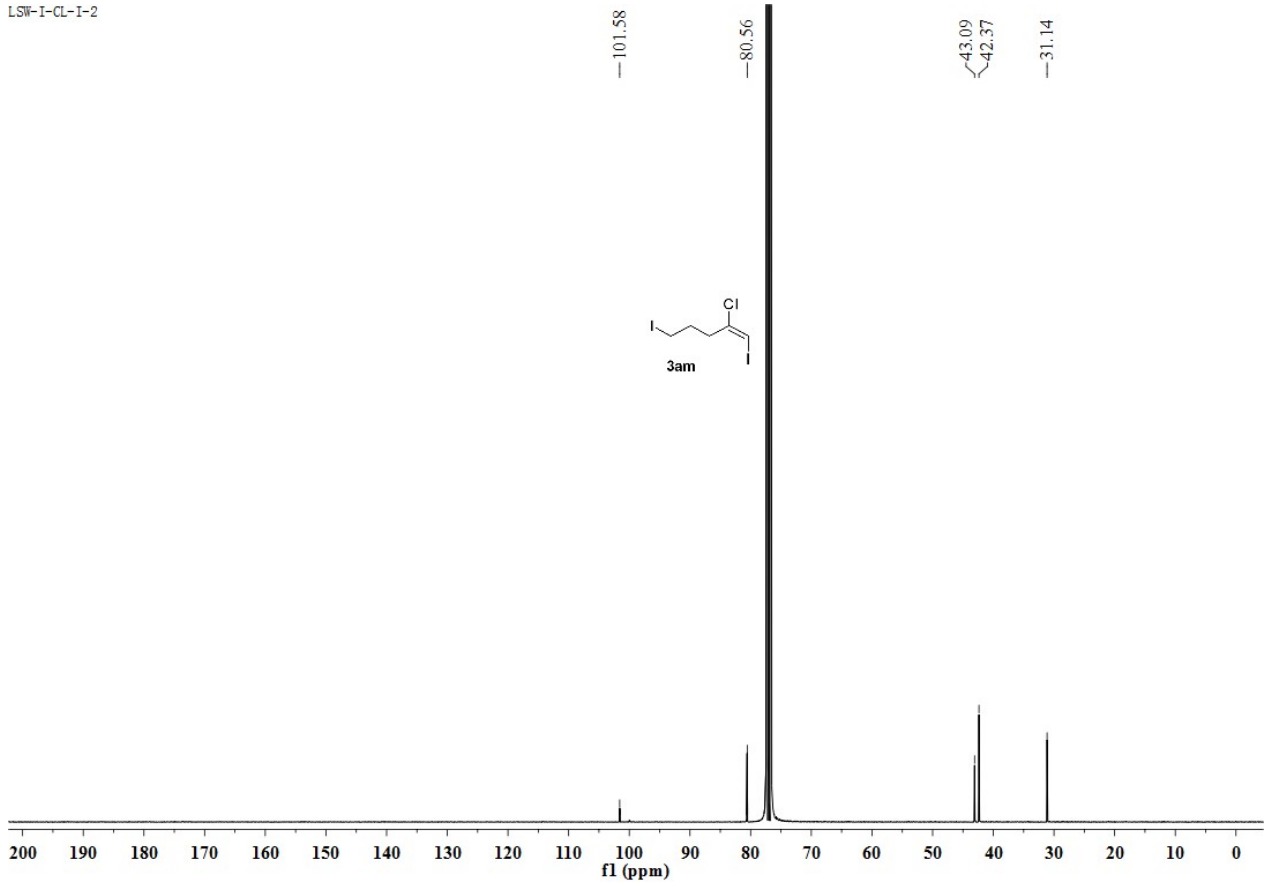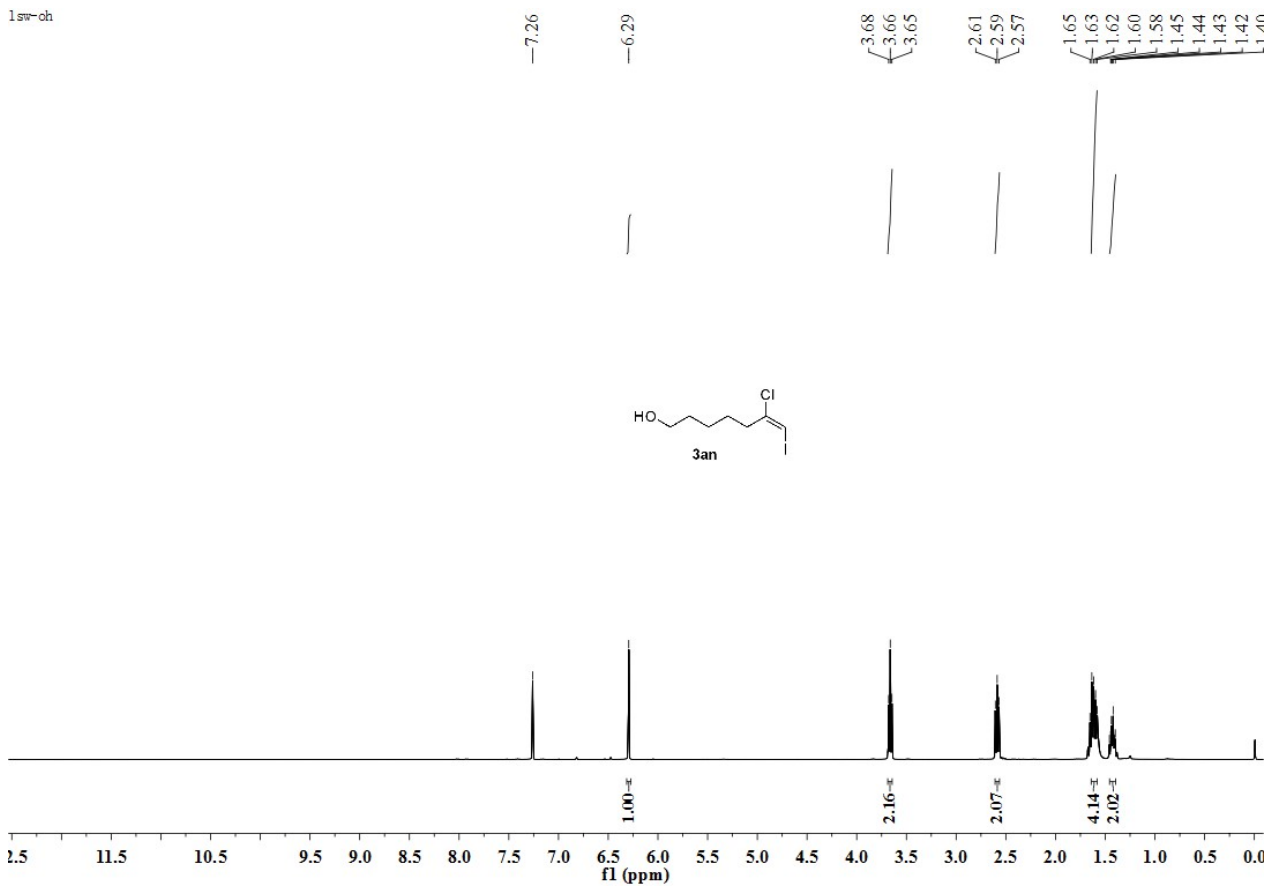

LSW-OH-CL-I

—138.02  
—72.47  
—62.77  
—38.43  
—32.47  
—26.46  
—24.64

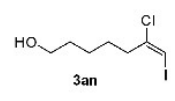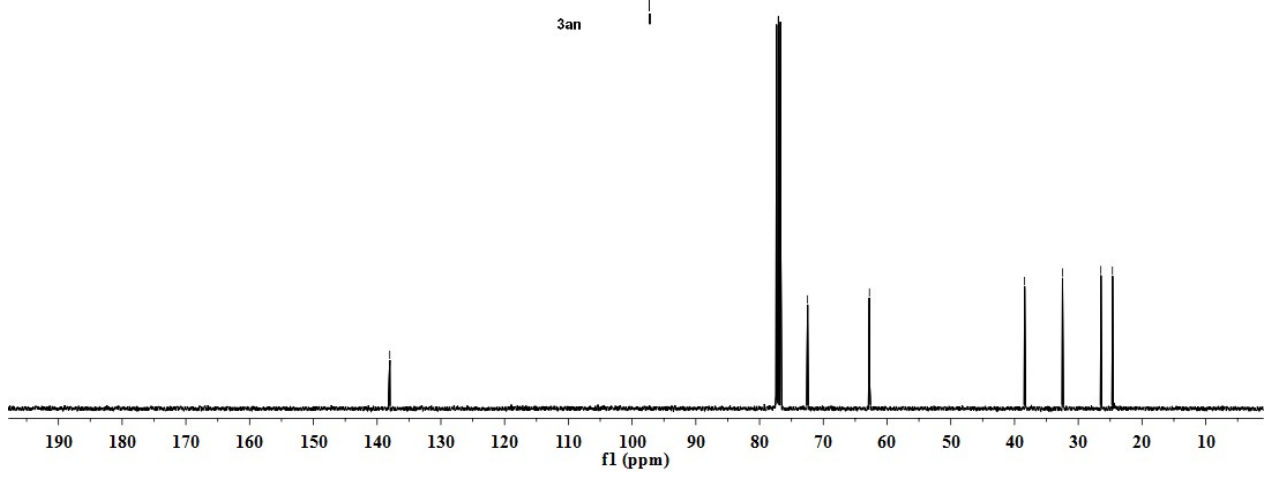

lsw-ots-cl-i

7.84  
7.82  
7.39  
7.37  
7.29  
—6.33  
4.10  
4.09  
4.07  
2.58  
2.57  
2.55  
2.48  
1.74  
1.73  
1.72  
1.71  
1.70  
1.69

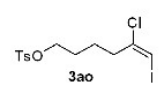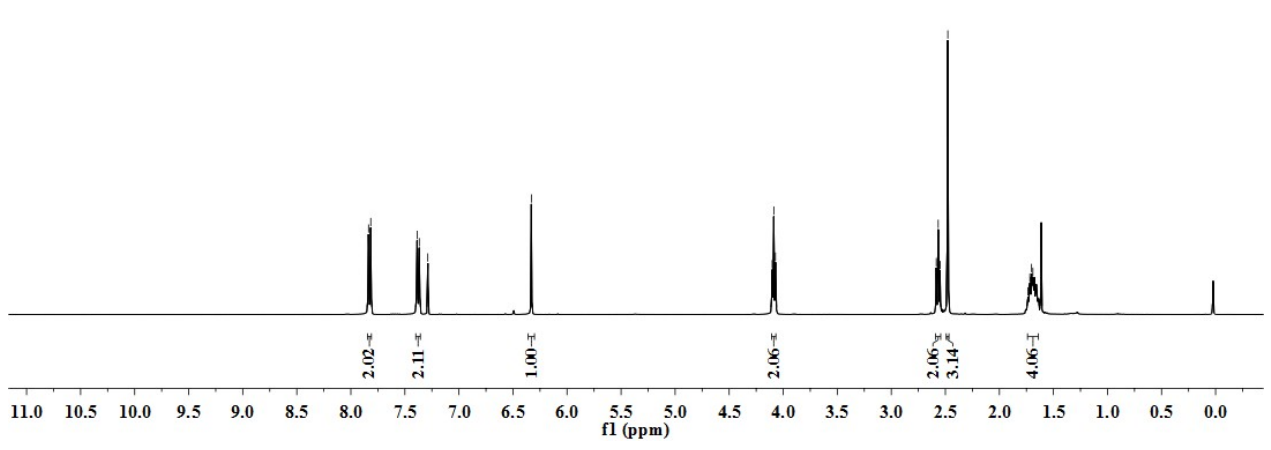

LSW-OTS-CL-I-1

—144.79  
—137.16  
—133.09  
—129.89  
—127.93  
  
—73.24  
—70.02  
  
—37.62  
—27.51  
—22.60  
—21.68

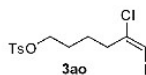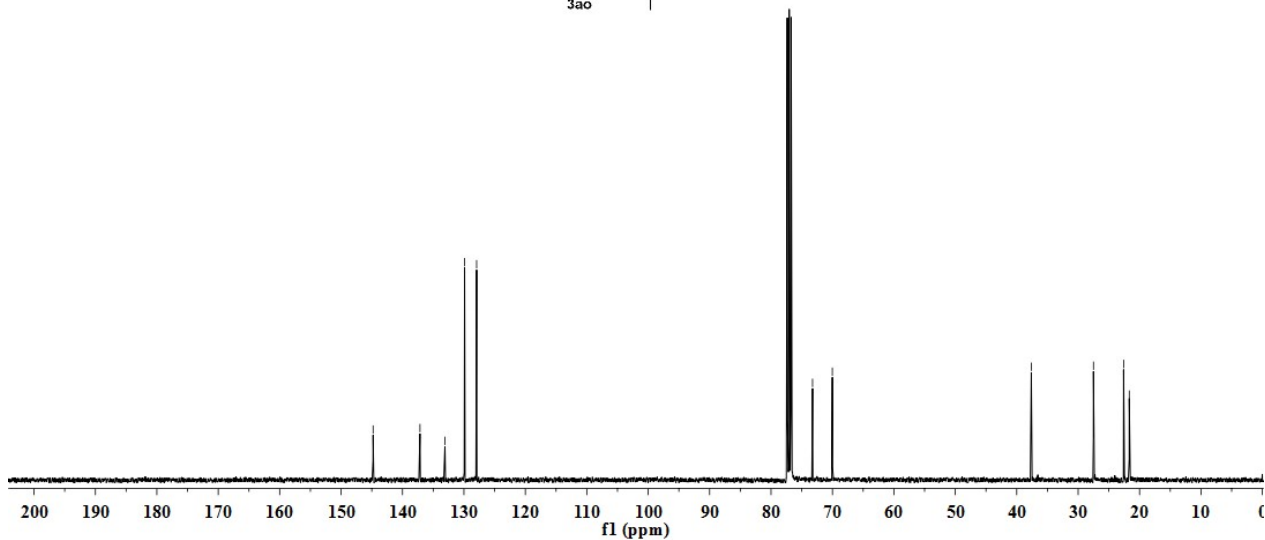

LSW-OBZ-CL-I

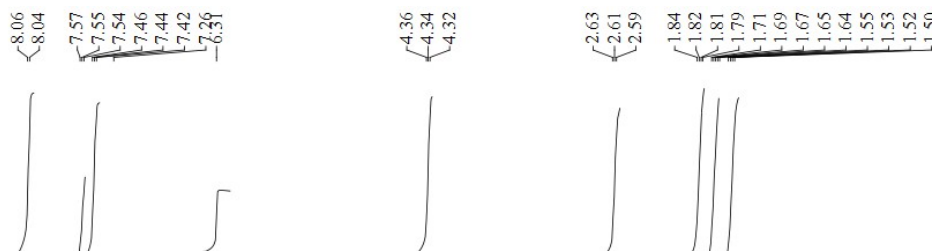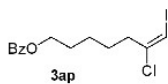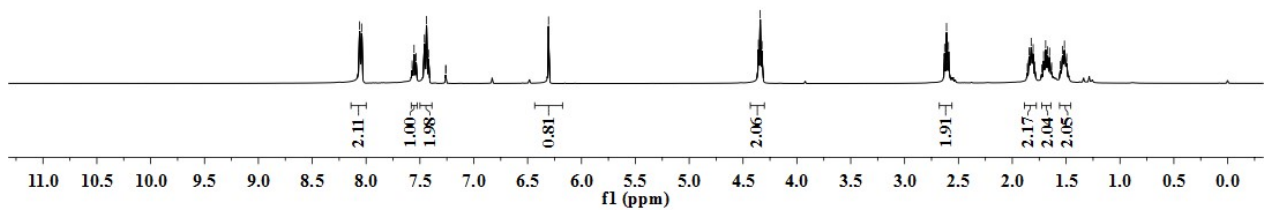

LSW-OBZ-CL-1

166.62

137.88  
132.84  
130.47  
129.57  
128.33

72.58

64.79

38.36

28.53  
26.33  
24.98

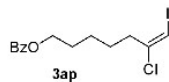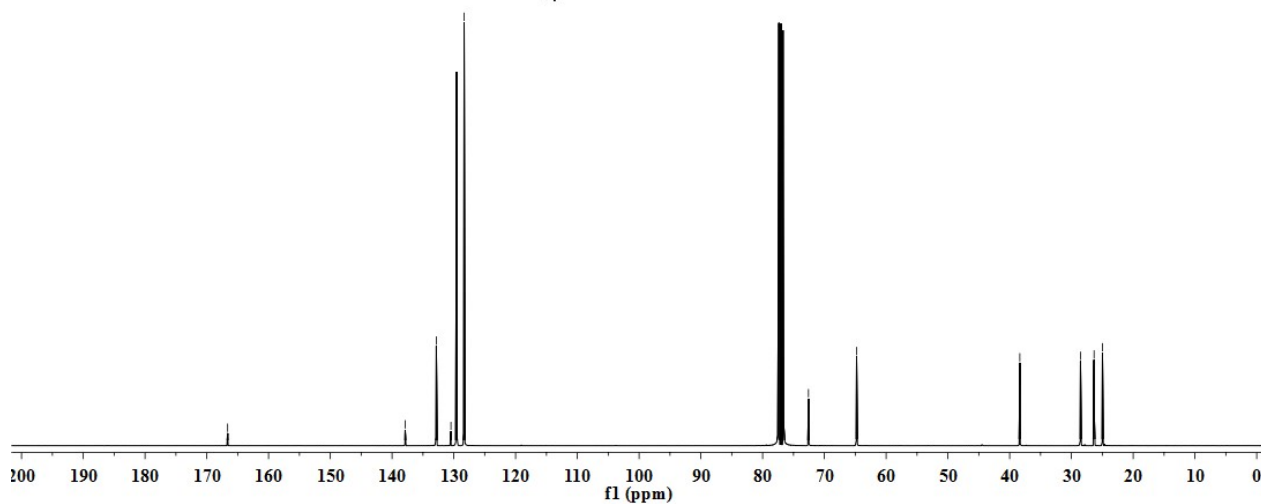

LSW-YAAN-CL-1-1

7.86  
7.85  
7.84  
7.83  
7.72  
7.72  
7.71  
7.70  
7.26

6.31

3.74  
3.72  
3.70

2.64  
2.62  
2.60

1.74  
1.73  
1.72  
1.70  
1.69  
1.67  
1.66  
1.65  
1.63  
1.63

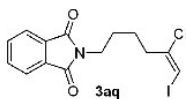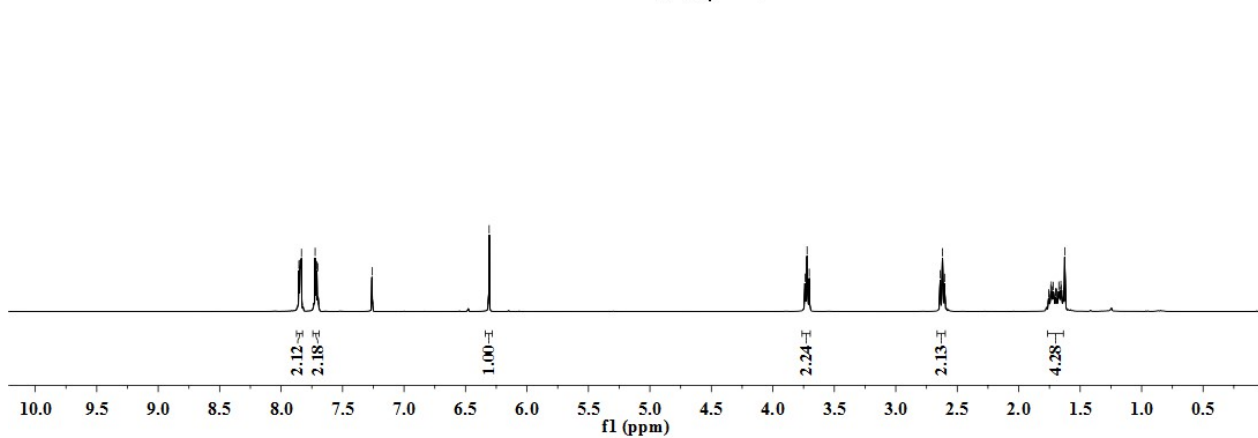

LSW-YAAN-CL-I-2

—168.39

~137.45

~133.92

~132.13

—123.23

—72.95

~37.93

~37.69

—27.38

—23.97

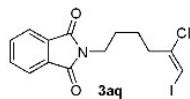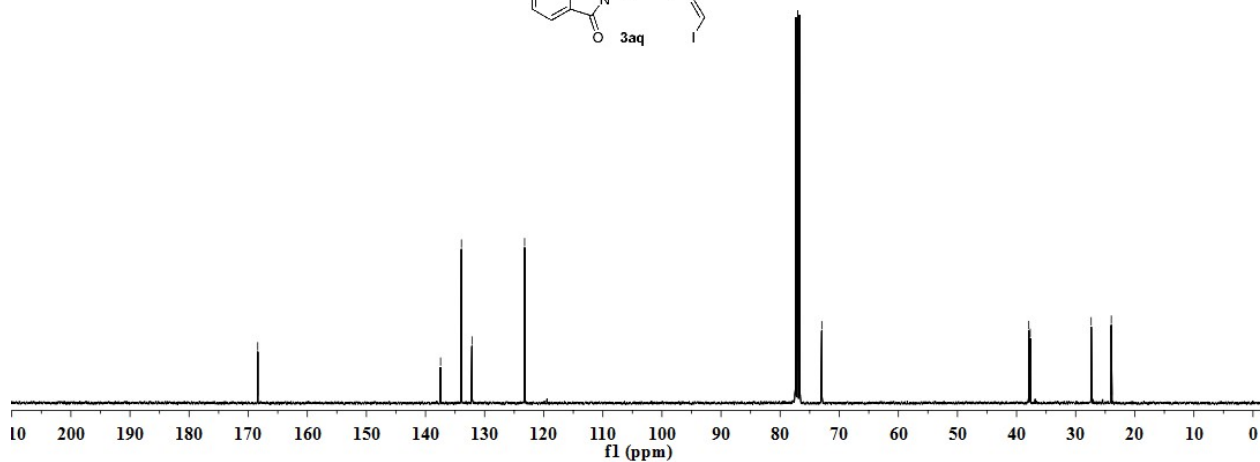

LSW-2-CL-CL-I

—7.26

~4.57

~4.50

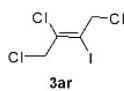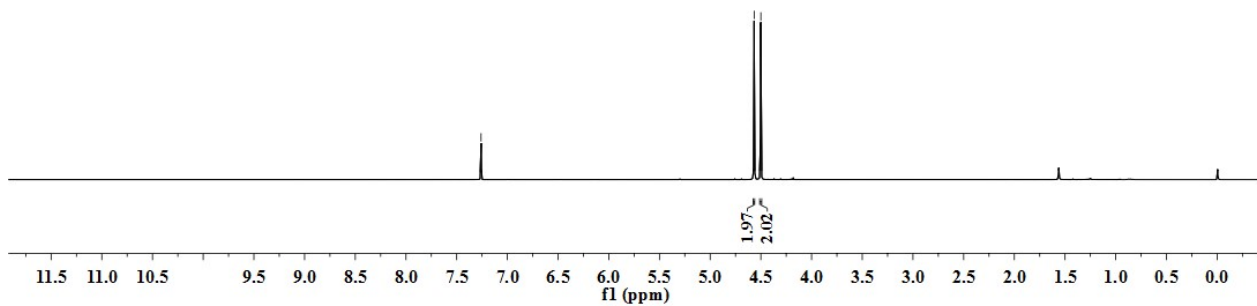

LSW-2CL-CL-I

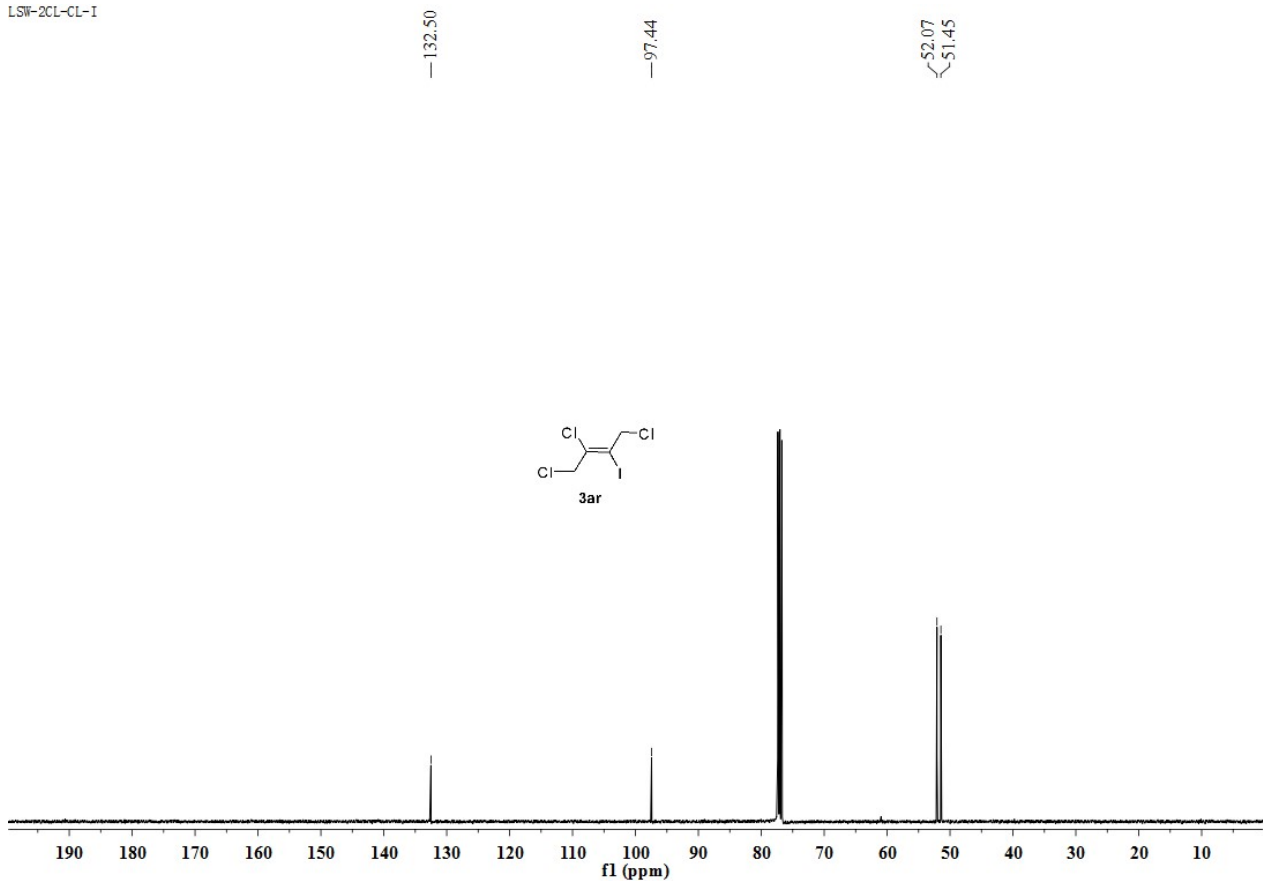

LSW-4XINQUE-CL-I

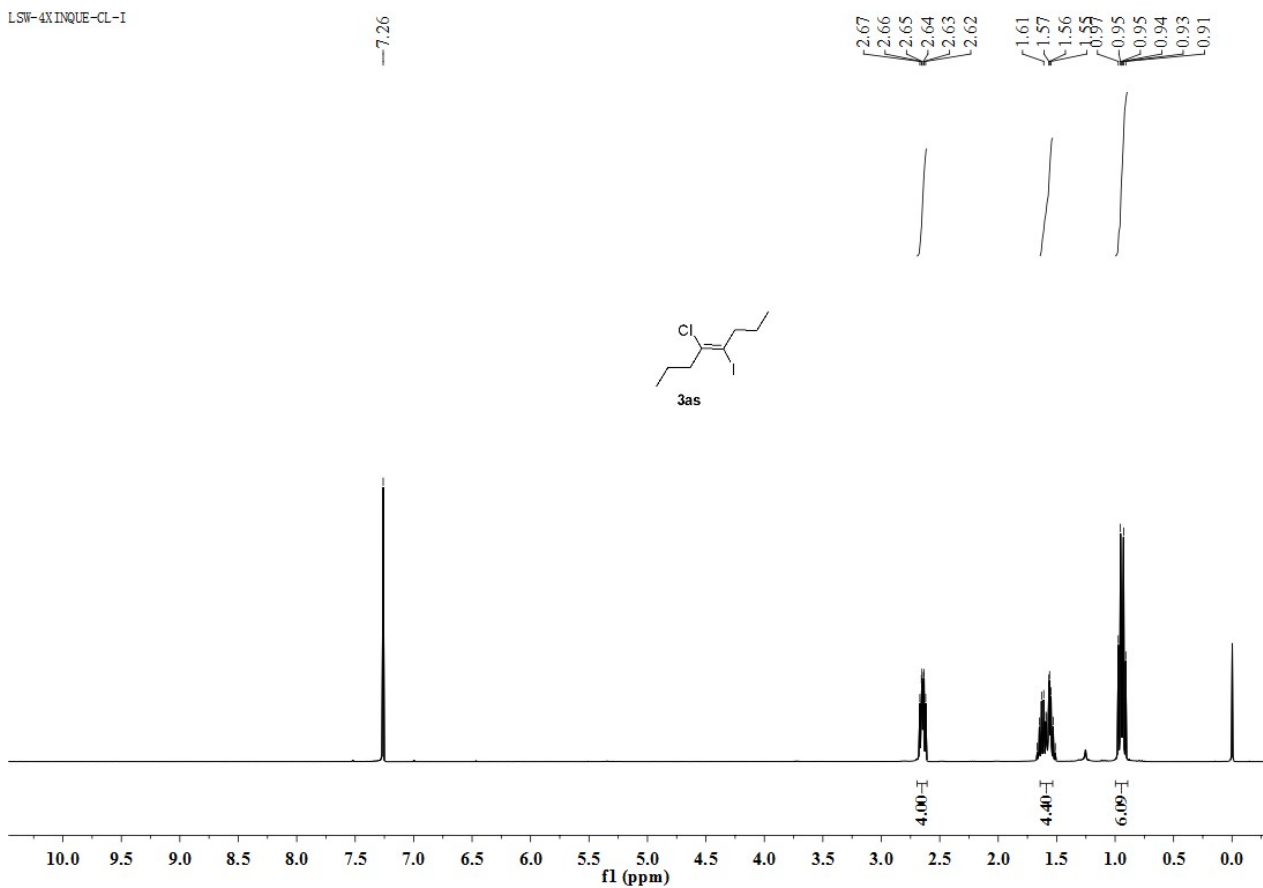

LSW-4-XINQUE-CL-I

131.55

99.23

44.74  
43.63

21.76  
20.49  
13.08  
12.80

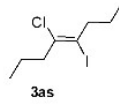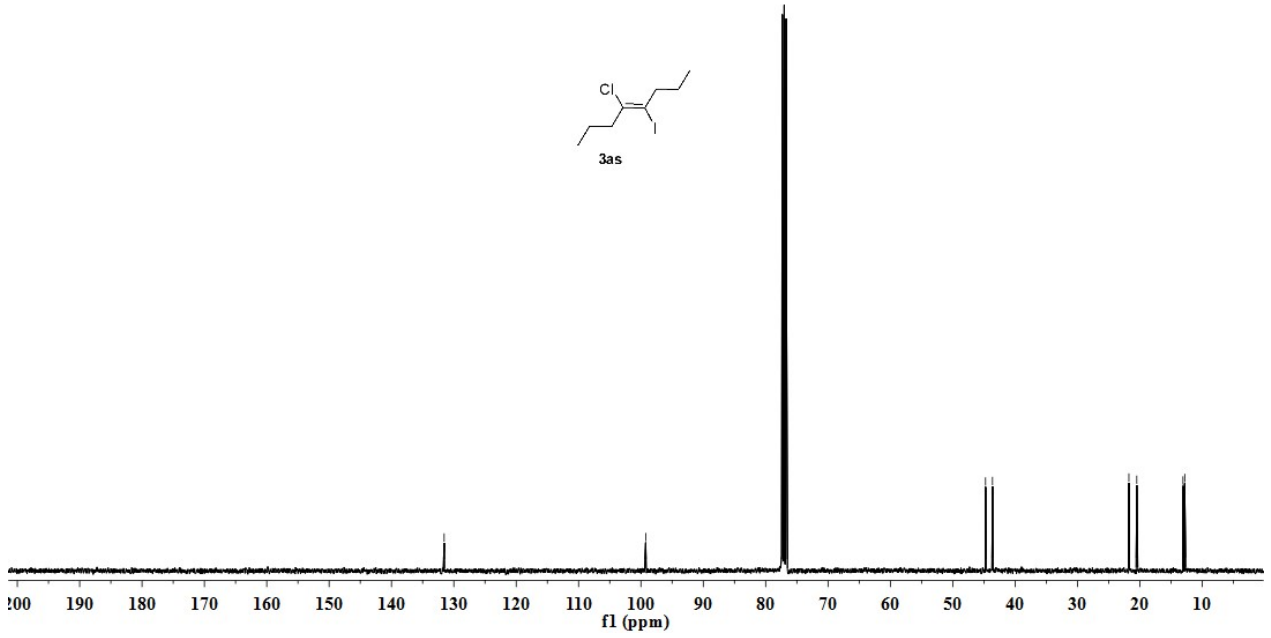

LSW-CY-ME-OH-CL-I

7.26  
7.26

2.79  
2.55  
2.54  
2.13  
2.12  
2.10  
2.09  
2.06  
2.05  
1.84  
1.80  
1.70  
1.66  
1.66  
1.63  
1.63  
1.62  
1.60  
1.59  
1.58  
1.28  
1.27  
1.25  
1.23  
1.23  
1.21  
1.18  
1.15

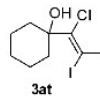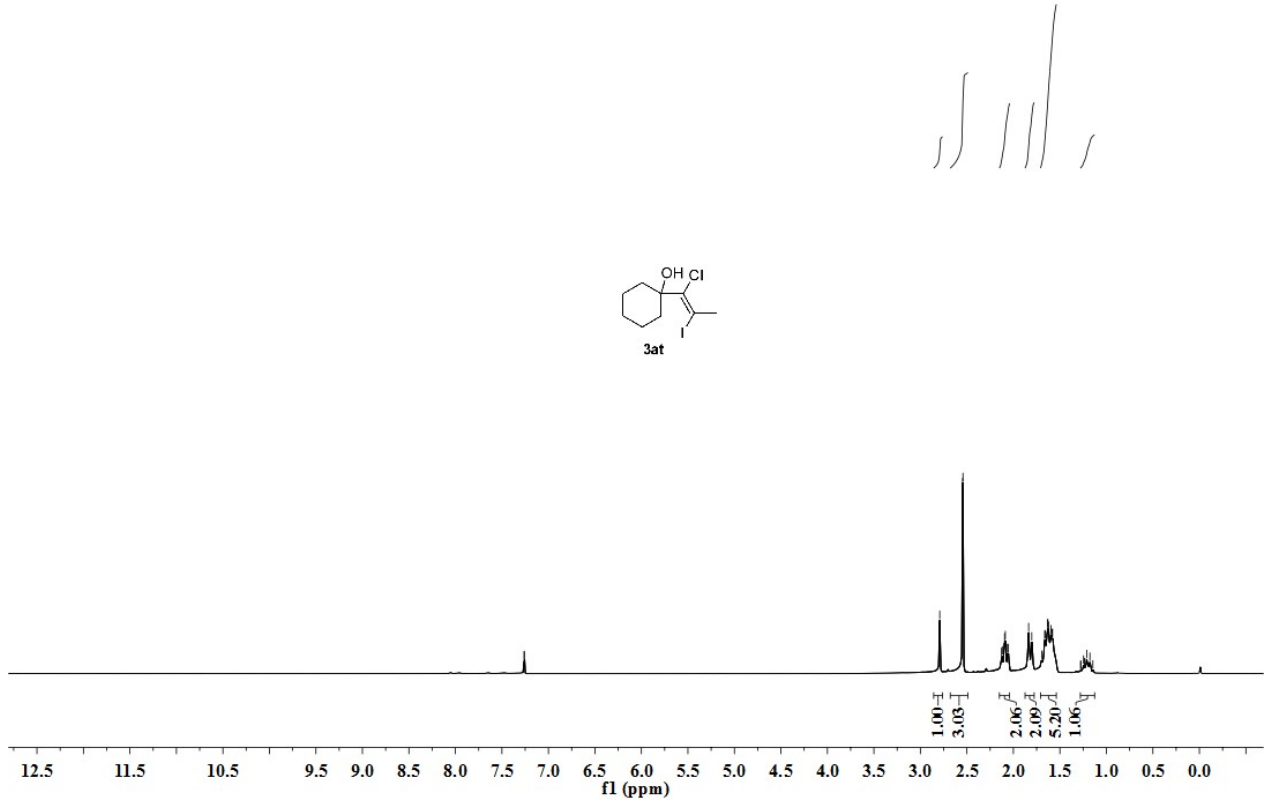

LSW-CY-ME-OH-CL-I

—125.26

—113.56

—75.94

—36.91

—35.60

—25.12

—22.33

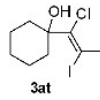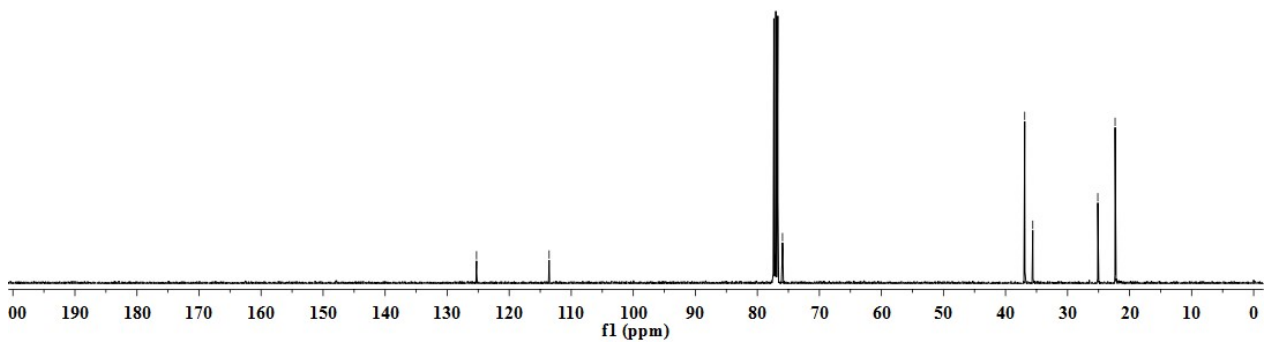

LSW-OBN-ME-CL-I

7.39  
7.37  
7.36  
7.34  
7.32  
7.30  
7.28  
7.26

4.52  
4.50  
4.21  
4.18  
4.01  
3.99  
3.97

2.48  
1.66  
1.66  
1.64  
1.63  
1.55  
1.53  
1.51  
1.49  
1.48  
1.45  
1.44  
1.29  
1.26  
0.88  
0.87

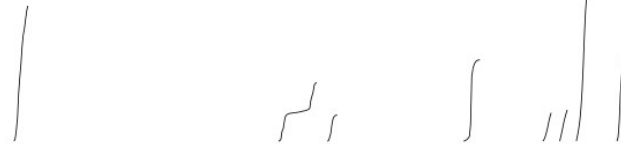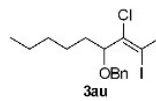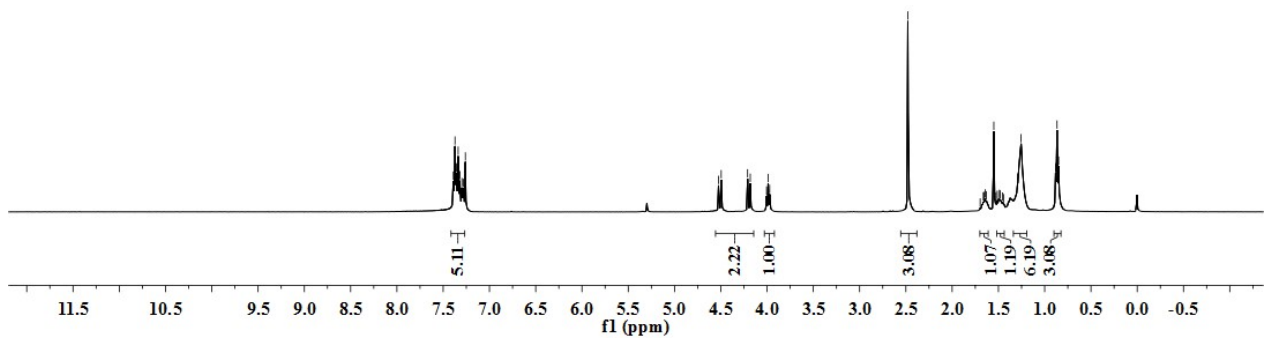



LSW-OBN-ME-CL-I

137.97  
129.52  
128.27  
128.26  
127.65

107.99

78.58

70.36

35.27  
31.60  
31.13  
24.35  
22.52

14.00

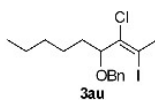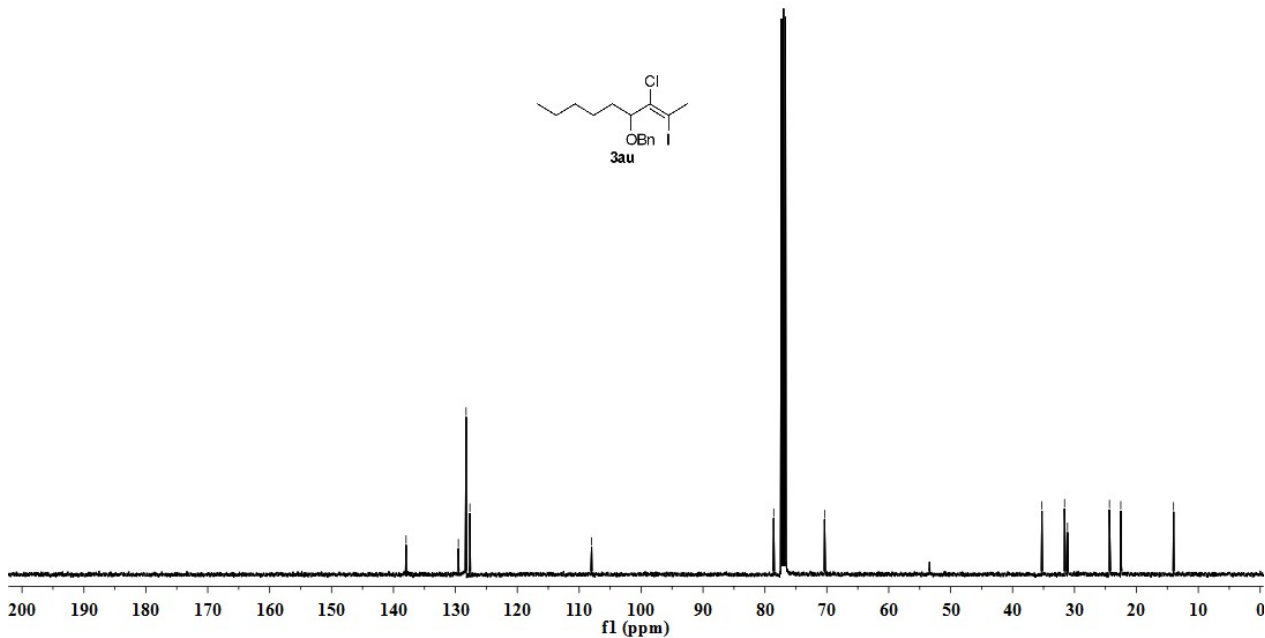

LSW-XIN-CO2ME

7.26

3.83

2.70  
2.68  
2.66  
1.65  
1.63  
1.61  
1.59  
1.36  
1.35  
1.34  
0.93  
0.91  
0.90

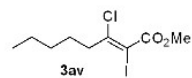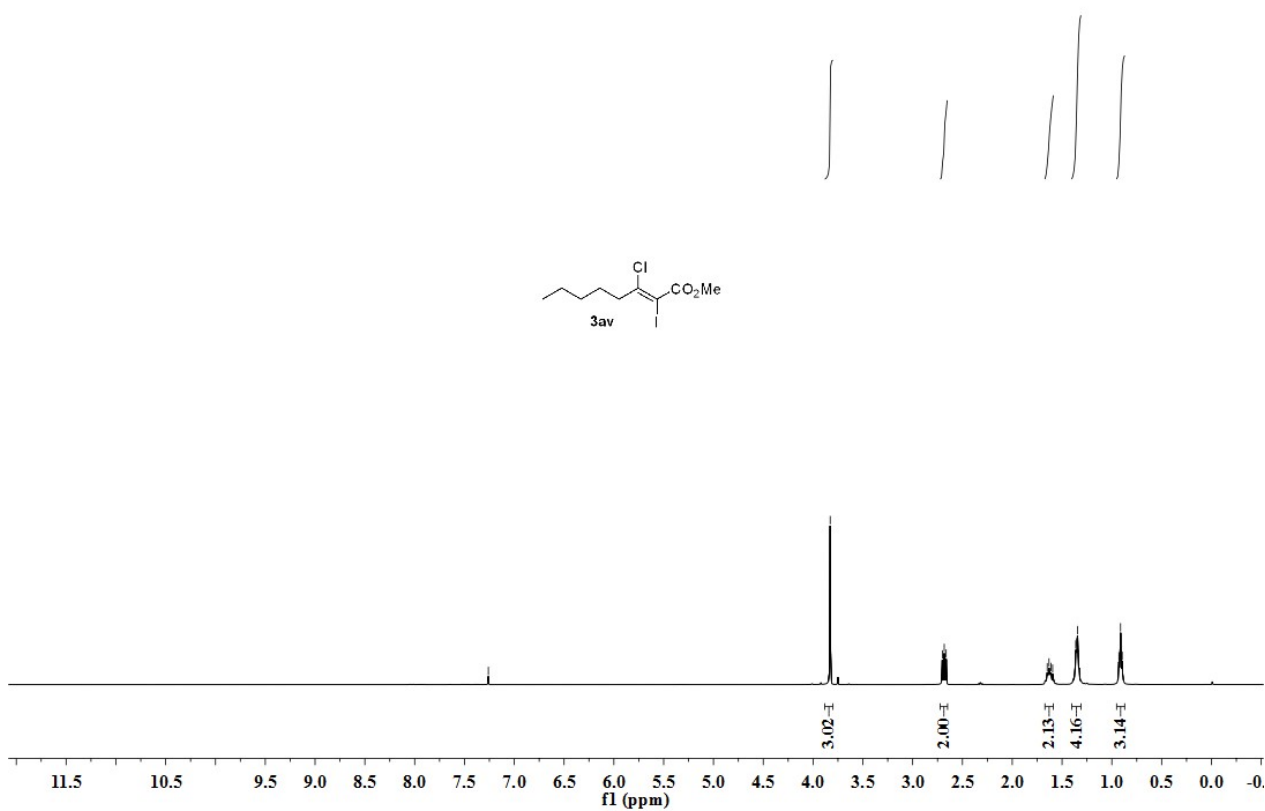

LSW-XIN-CO2ME

—165.40

—139.67

—79.54

—53.16

—41.67

—30.74

—26.44

—22.38

—13.87

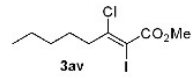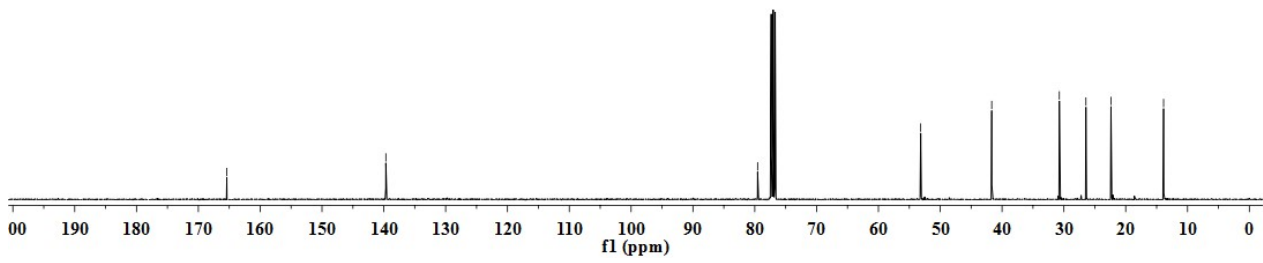

LSW-QUE-SME-CL-I-1

7.35  
7.34  
7.33  
7.31  
7.29  
7.28  
7.28  
7.27  
7.27  
7.26

—2.53

—1.56

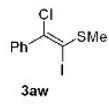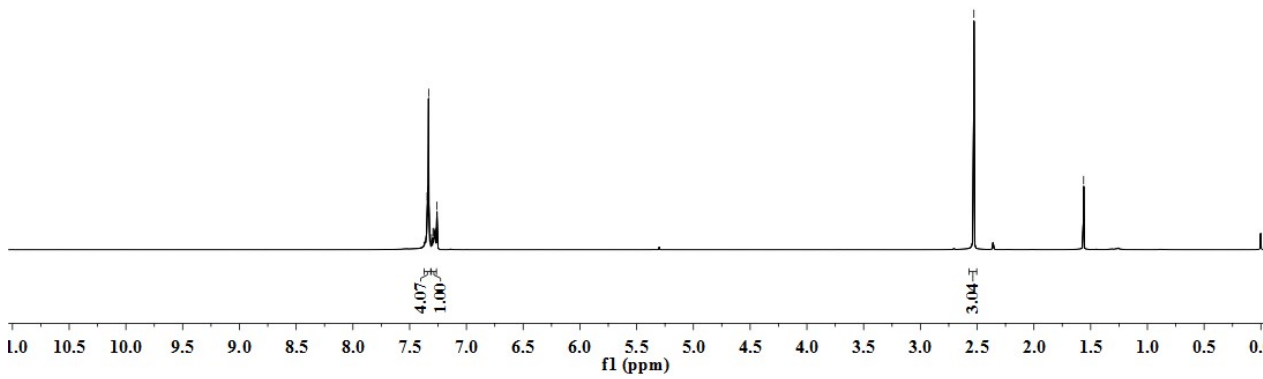

LSW-SME-QUE-CL-I

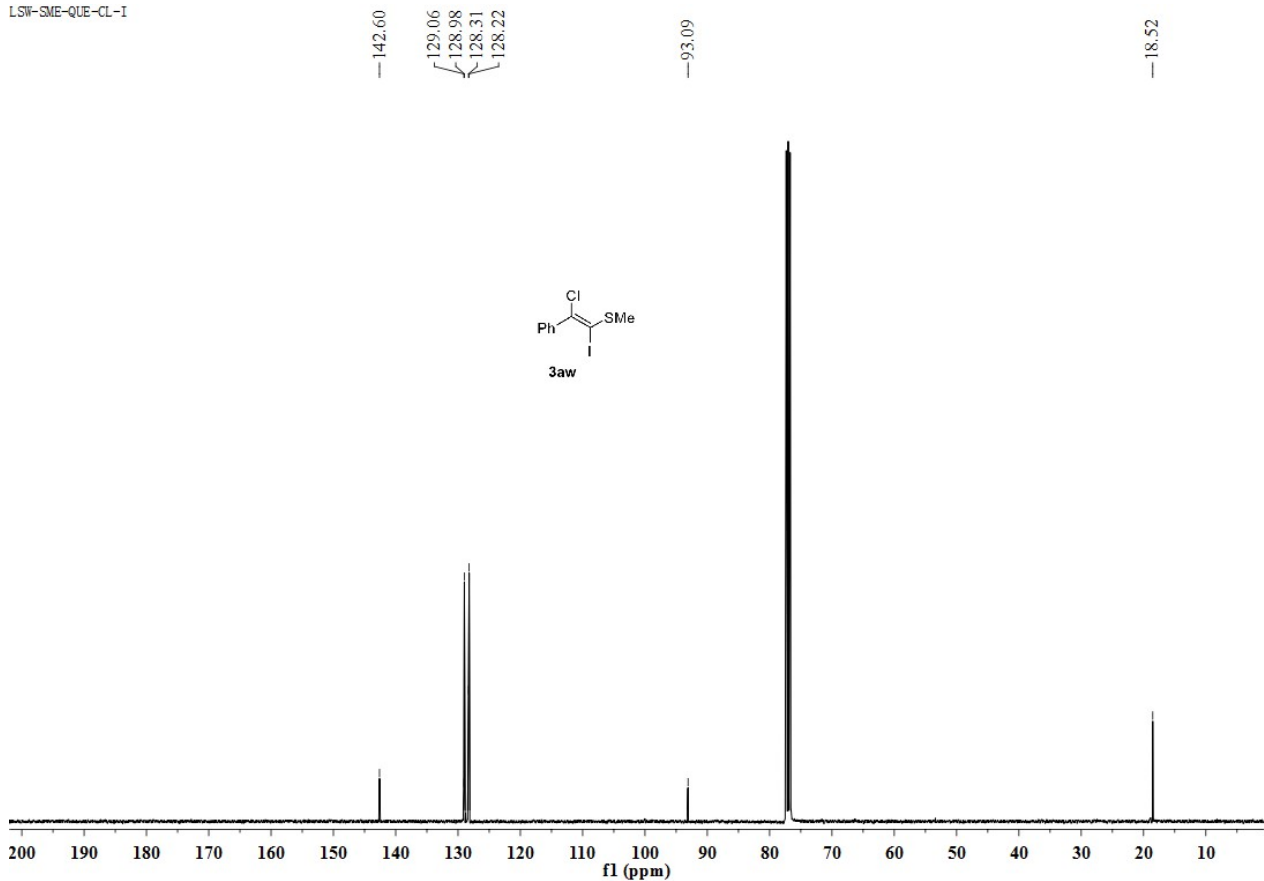

LSW-QUE-SPH

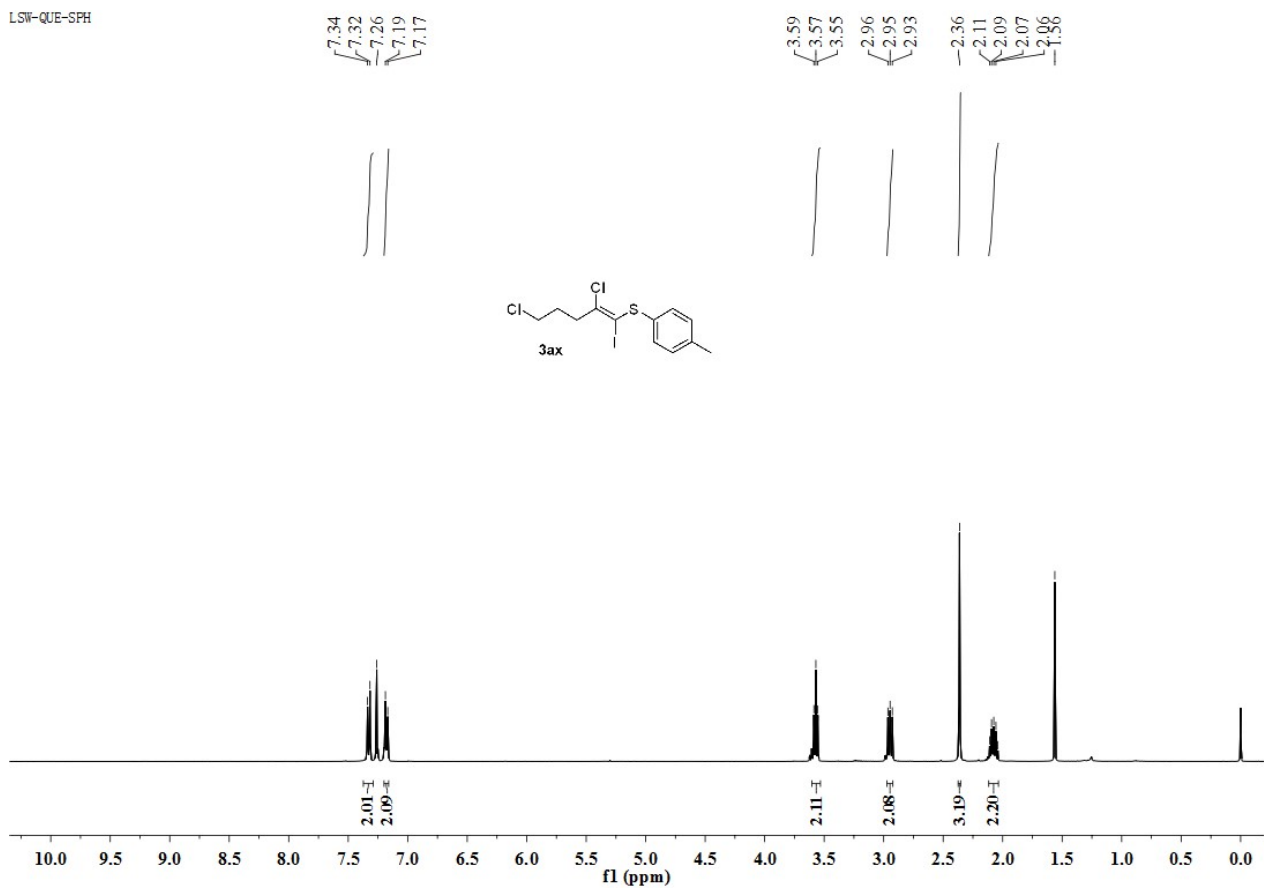

LSW-QUE-SPH-CL-I

138.97  
132.64  
130.00  
128.73  
127.98

104.12

43.36  
40.75

31.53

21.29

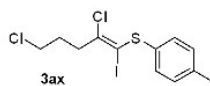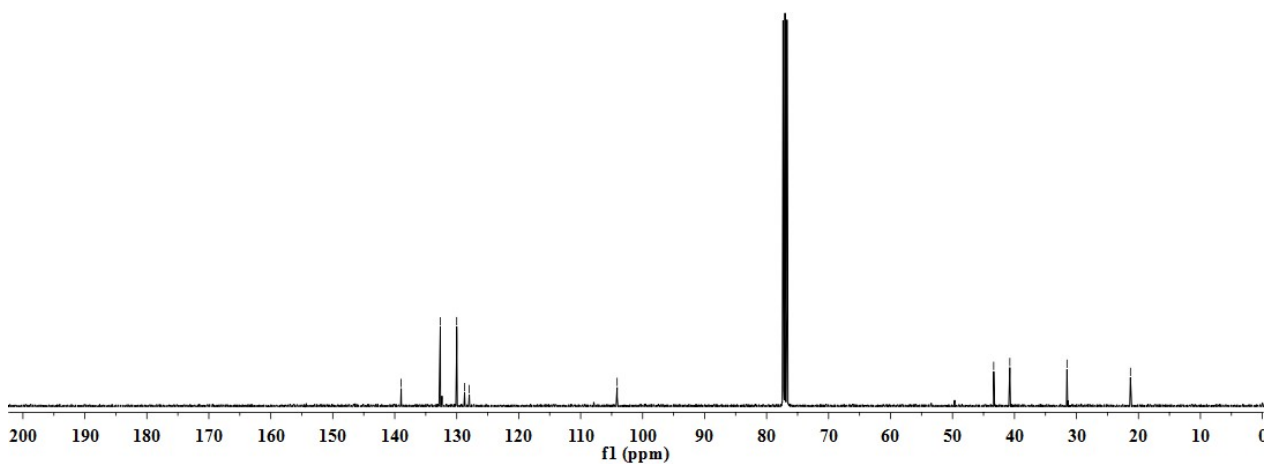

LSW-QUE-O-CL-I

7.26  
7.16  
7.14  
6.91  
6.89

2.61  
2.59  
2.57  
2.32  
1.64  
1.60  
1.56  
1.40  
1.39  
1.38  
1.37  
0.96  
0.95

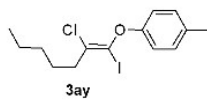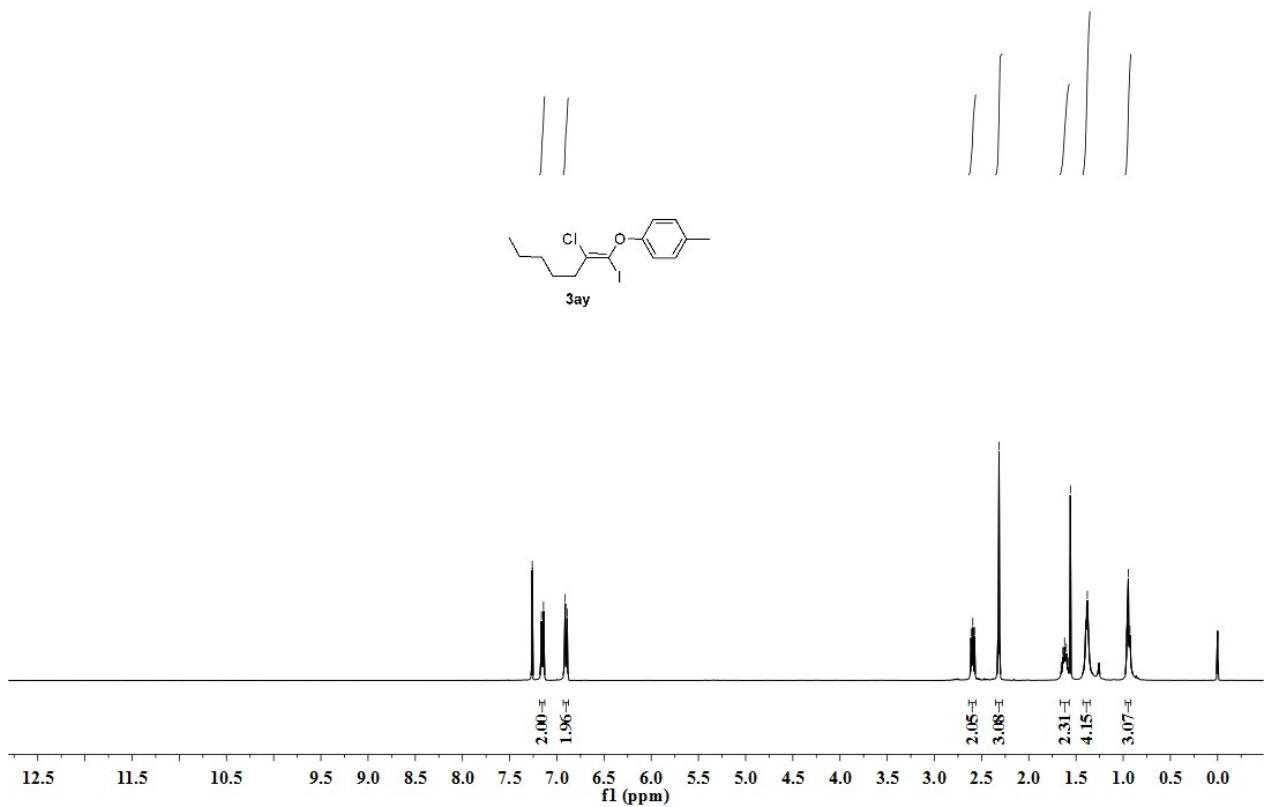

LSW-QUE-0-CL-I-1

— 152.04  
— 133.73  
— 130.26  
— 117.30  
— 104.07  
— 91.09  
— 43.88  
— 30.58  
— 28.28  
— 22.55  
— 20.80  
— 14.02

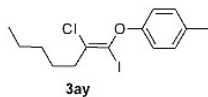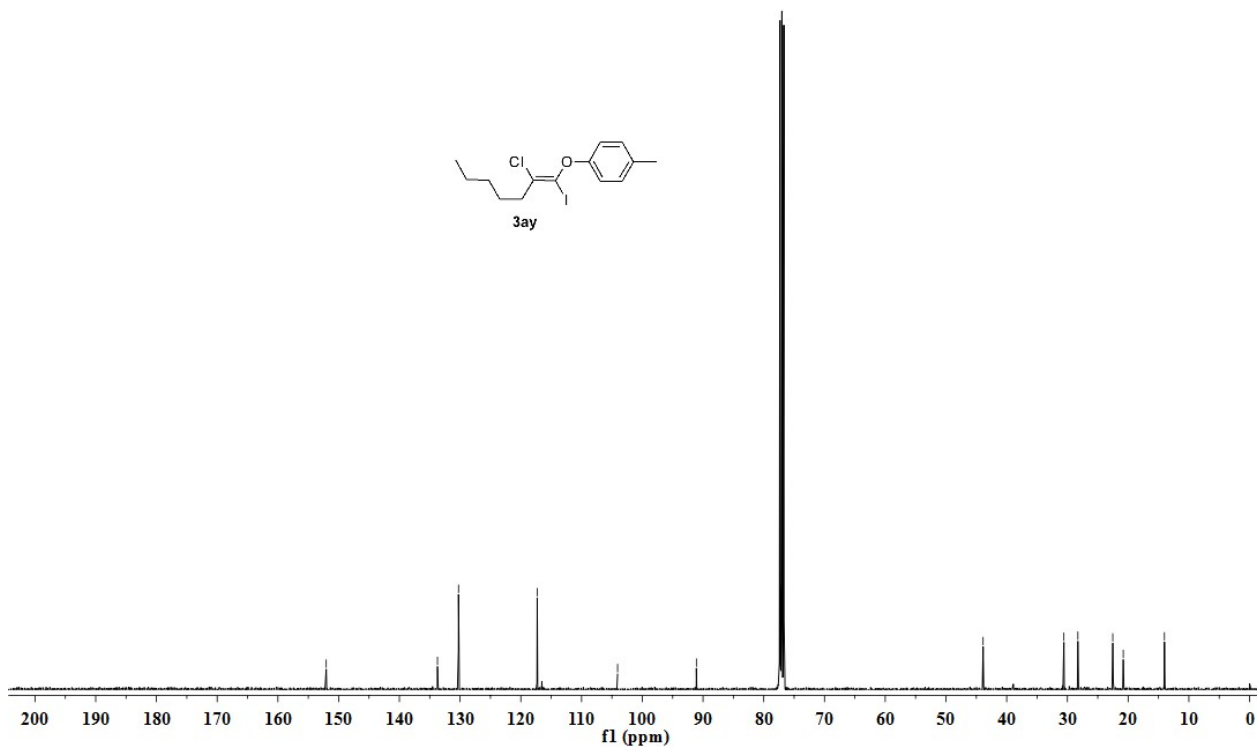

lsw-que-si-cl-i

— 6.92  
— 6.92  
— 6.91  
— 6.90  
— 6.87  
— 6.87  
— 6.86  
— 6.85  
— 6.83  
— 0.00  
— -0.47

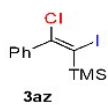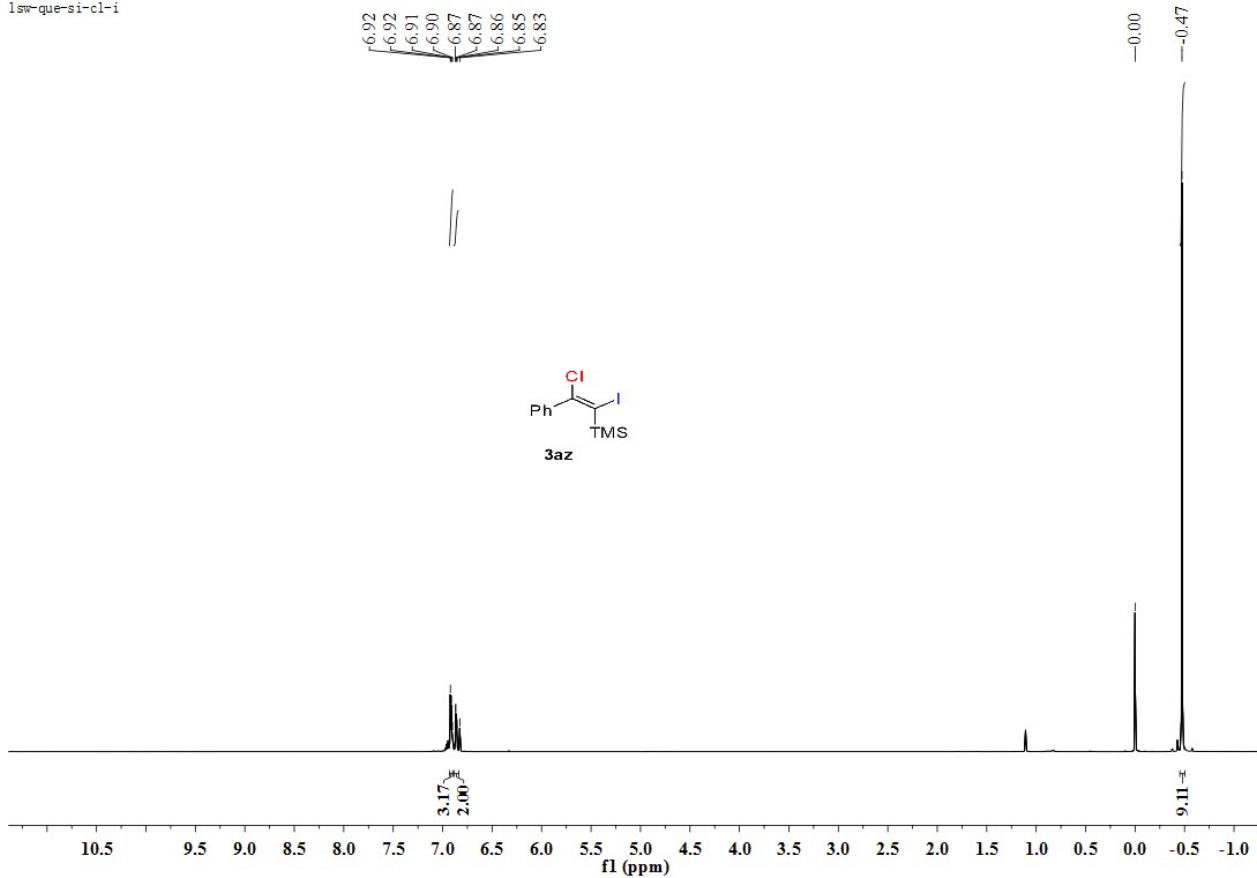

1sm-que-si-cl-i

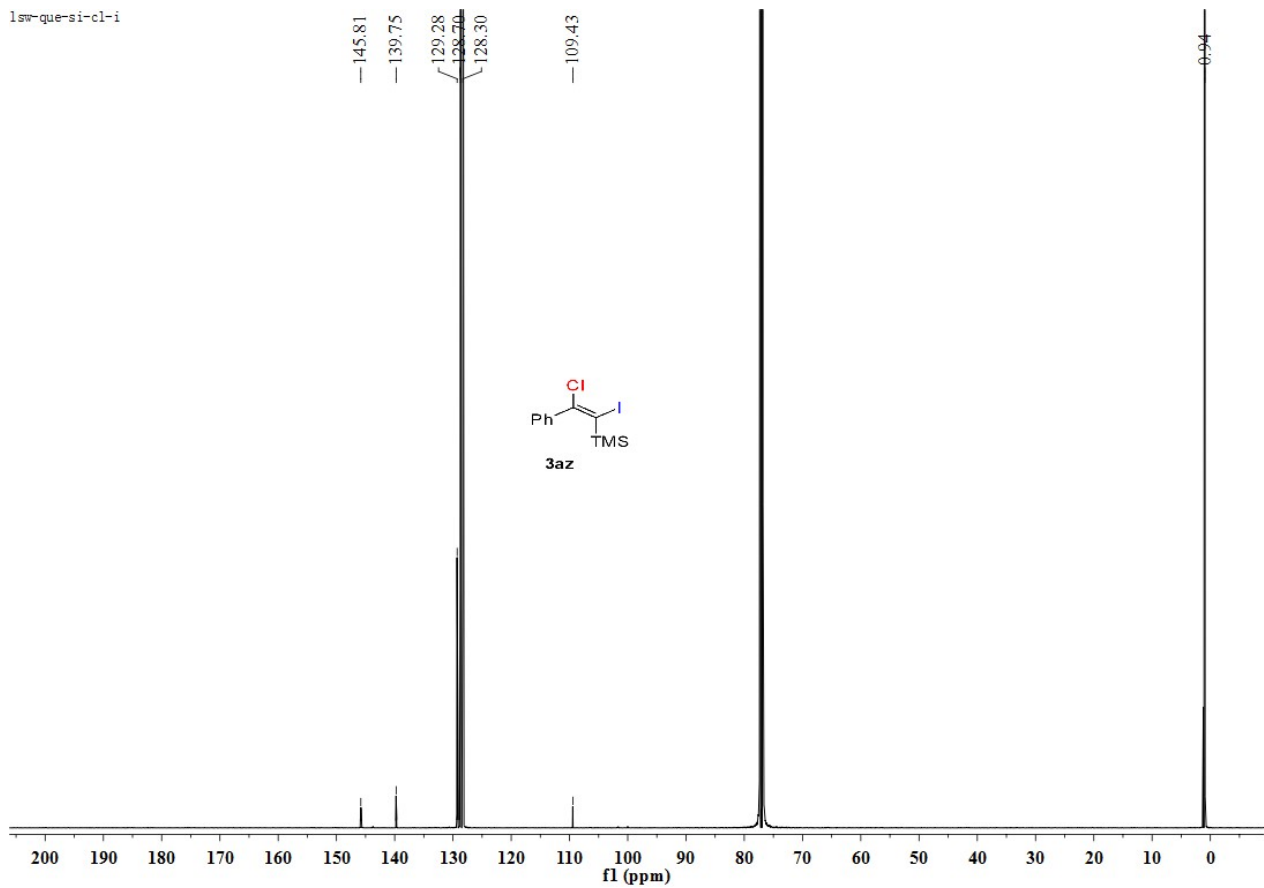

LSW-QUELV-CL-I

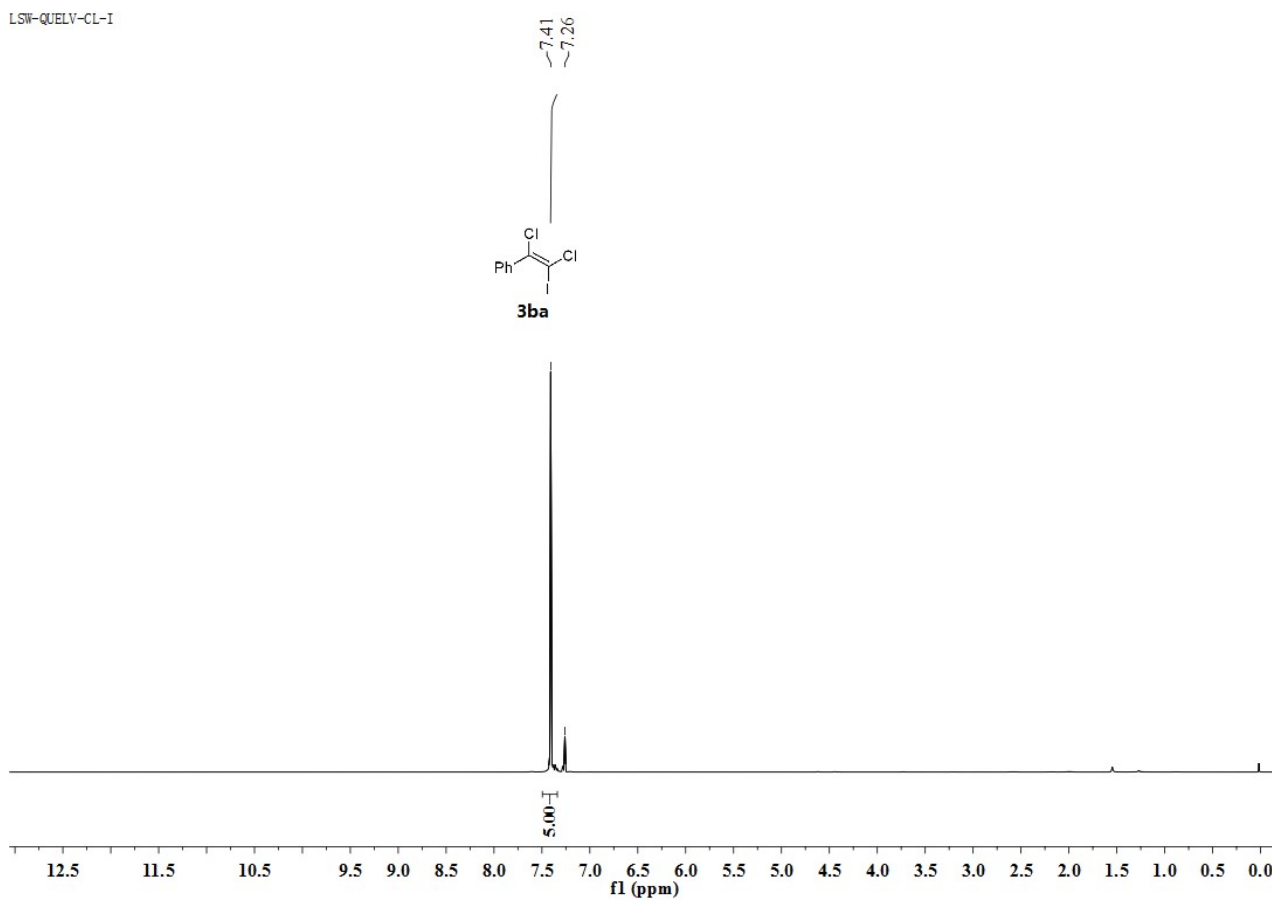

LSW-QUELV-CL-I

139.30  
133.37  
129.63  
129.18  
128.56

69.73

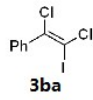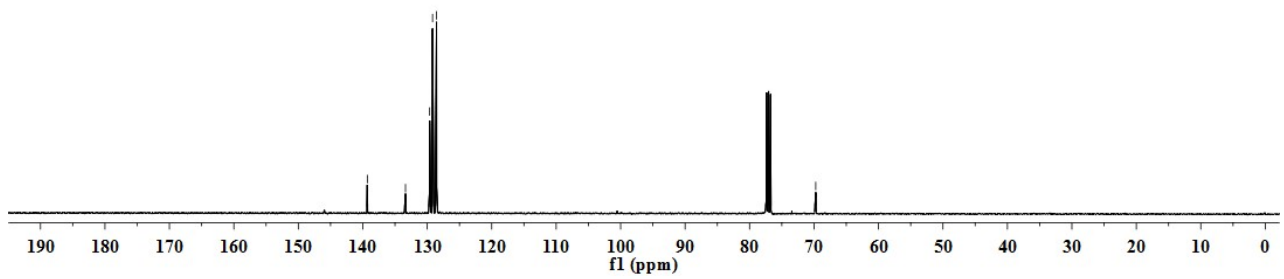

1sw-smie-one

7.40  
7.26

1.55

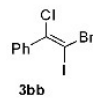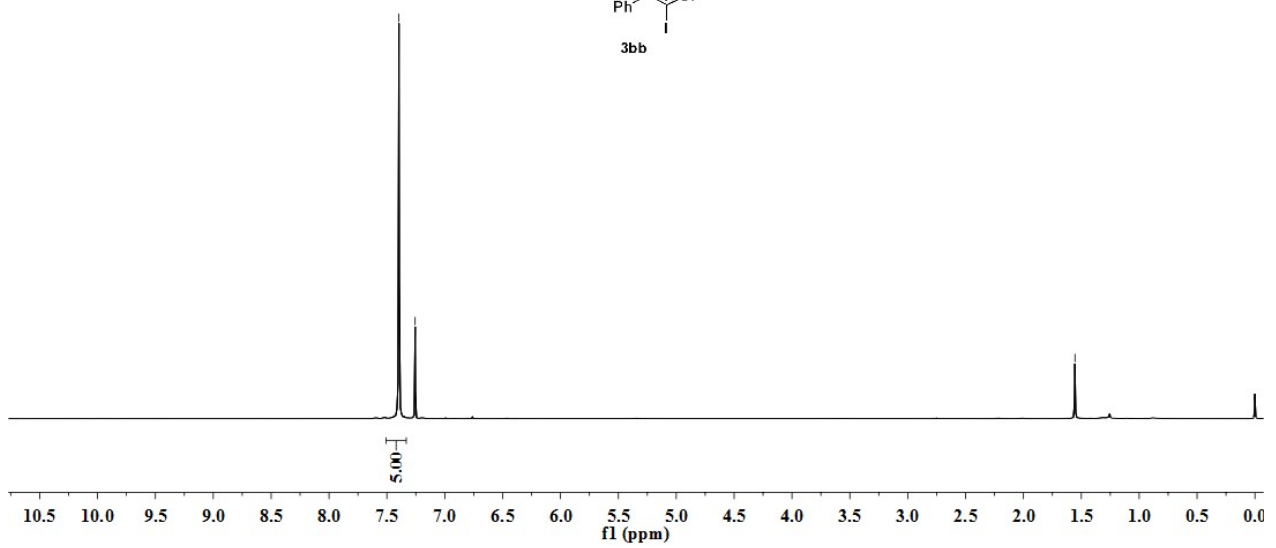

1sm-que-br

139.73  
136.04  
129.56  
128.84  
128.56

-51.84

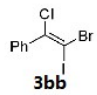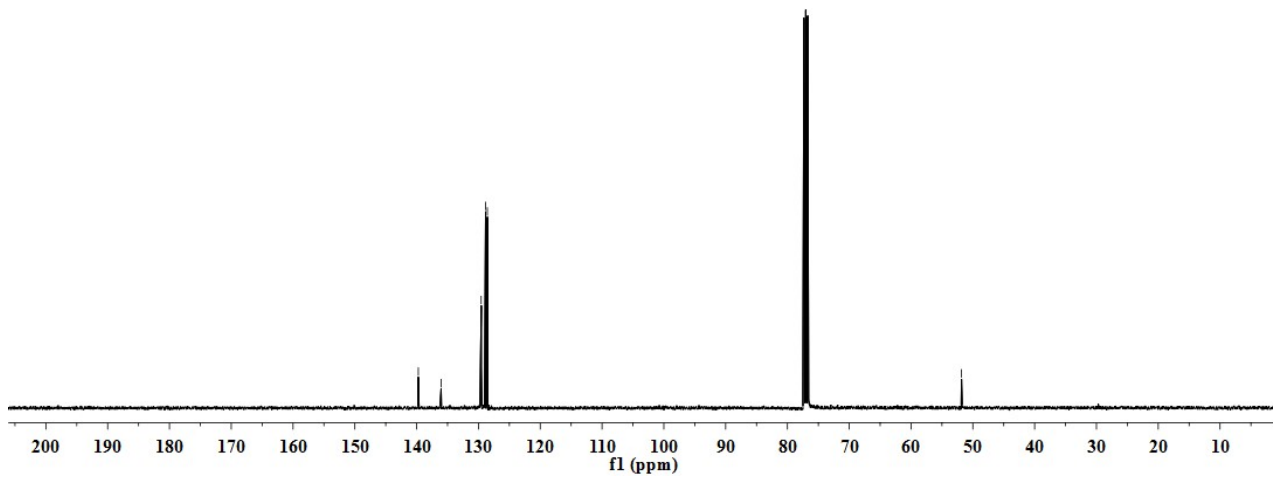

LSW-QUE-I

-7.26

-1.55

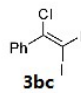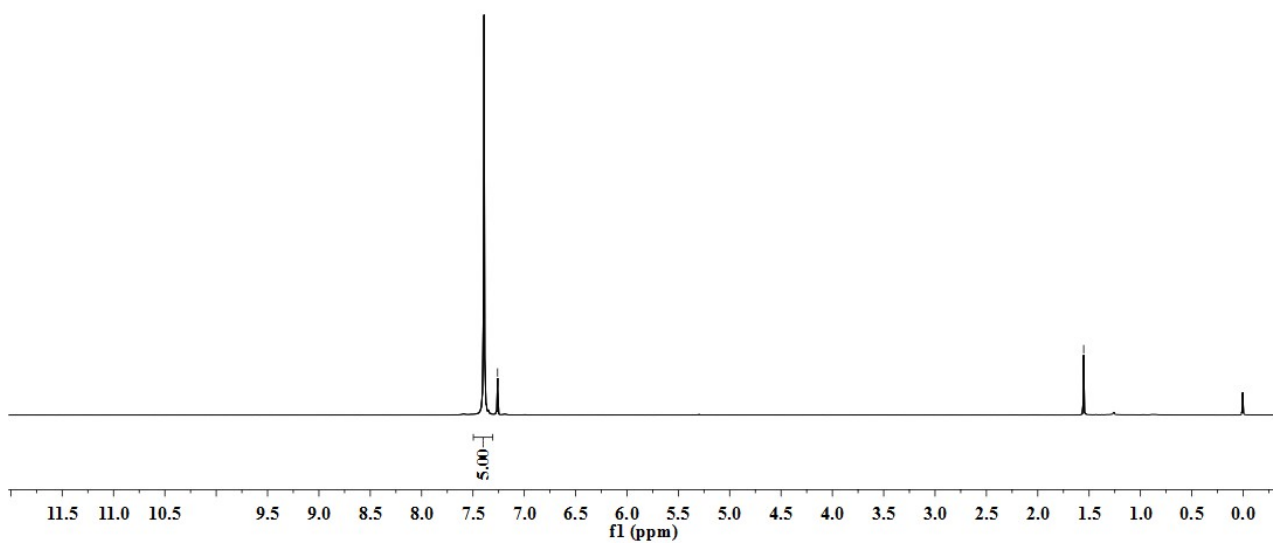



LSW-QUE-I-CL-I-2

140.68  
139.60  
129.44  
128.59  
128.53

14.27

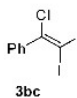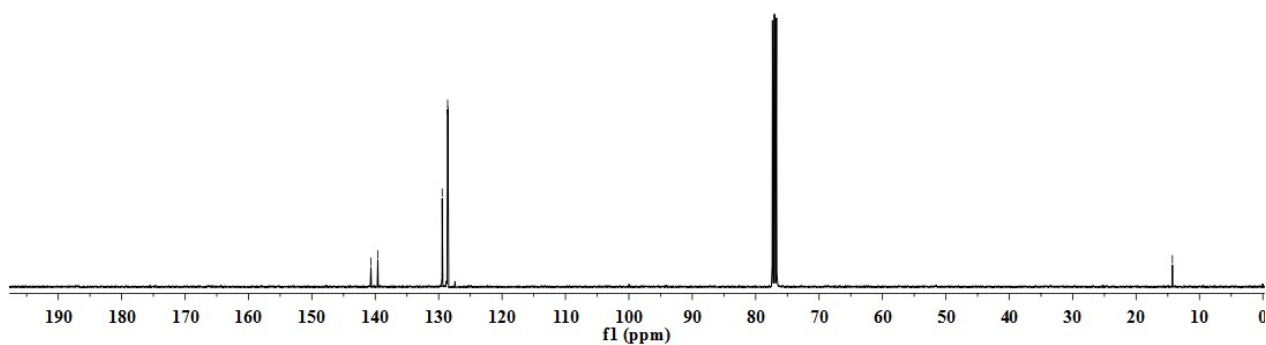

LSW-07-A

7.30  
7.28  
7.26  
7.25  
7.20  
7.18

2.38

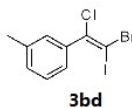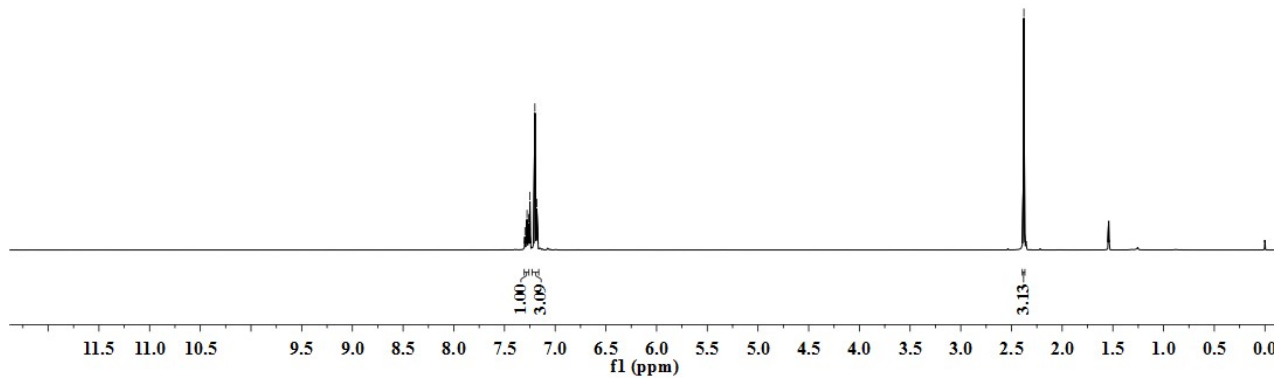

LSW-7A

139.64  
138.42  
136.22  
130.34  
129.31  
128.45  
125.94

-51.61

-21.37

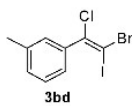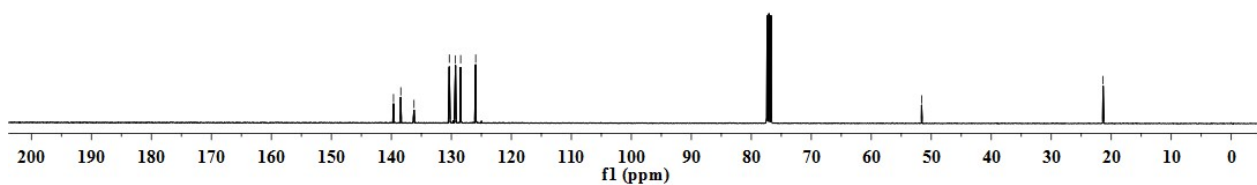

LSW-CN-BR-CL-I

-7.26

2.85  
2.83  
2.82  
2.44  
2.42  
2.40  
2.04  
1.92  
1.58

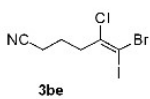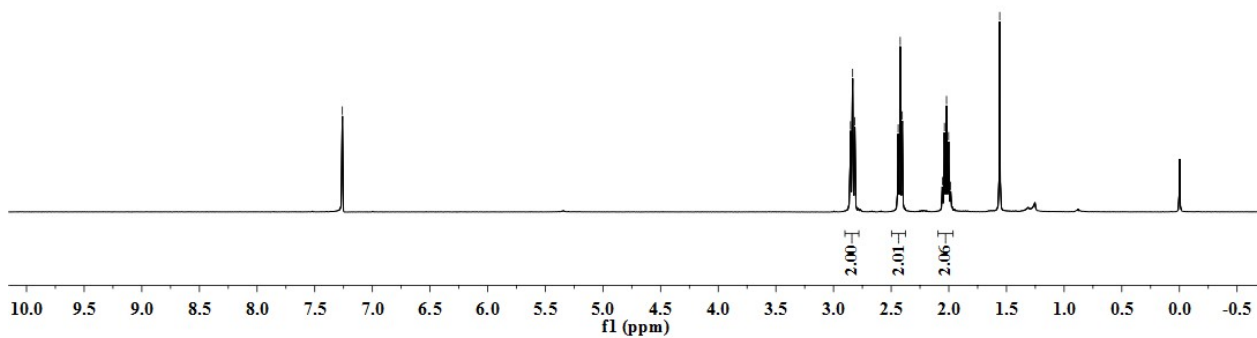

LSW-CN-BR-CL-I

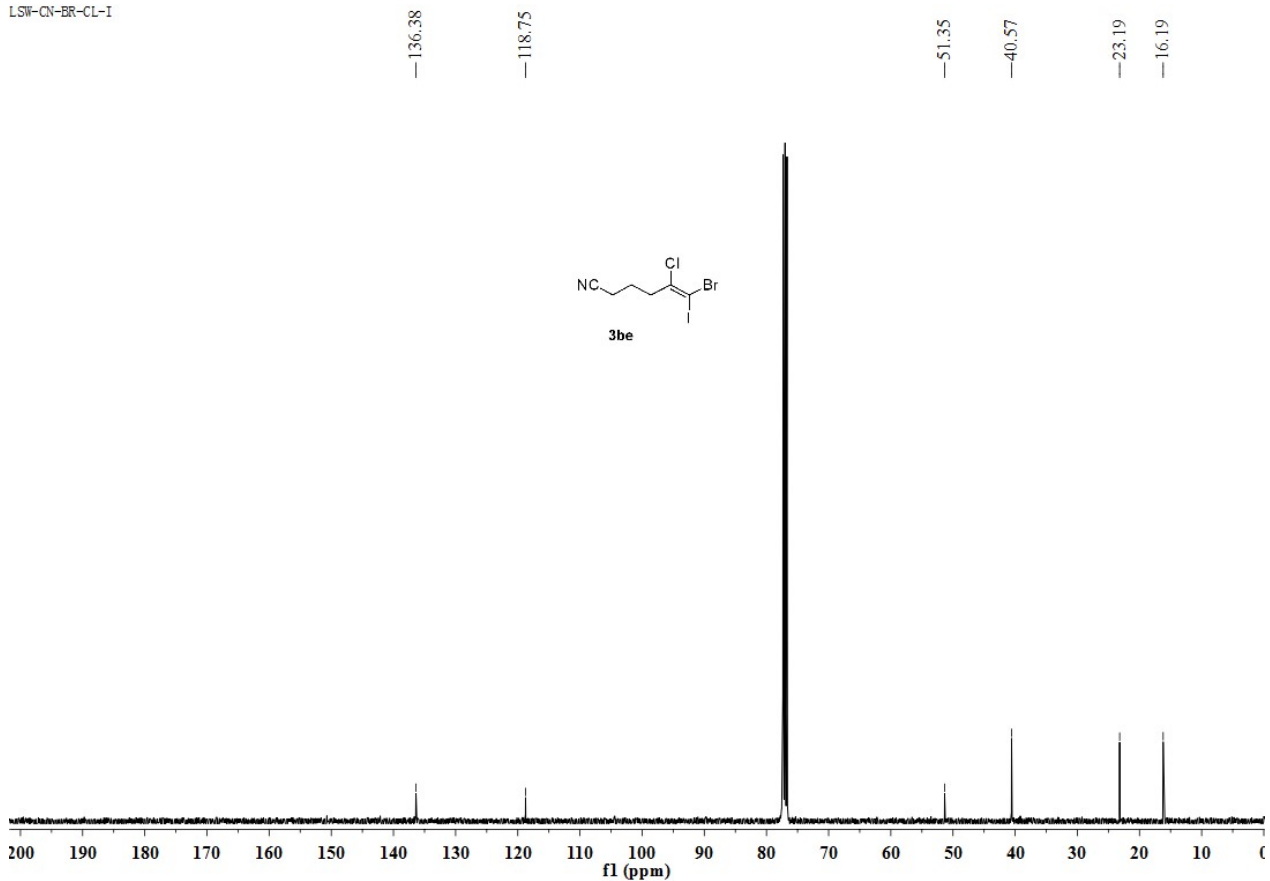

LSW-07-C

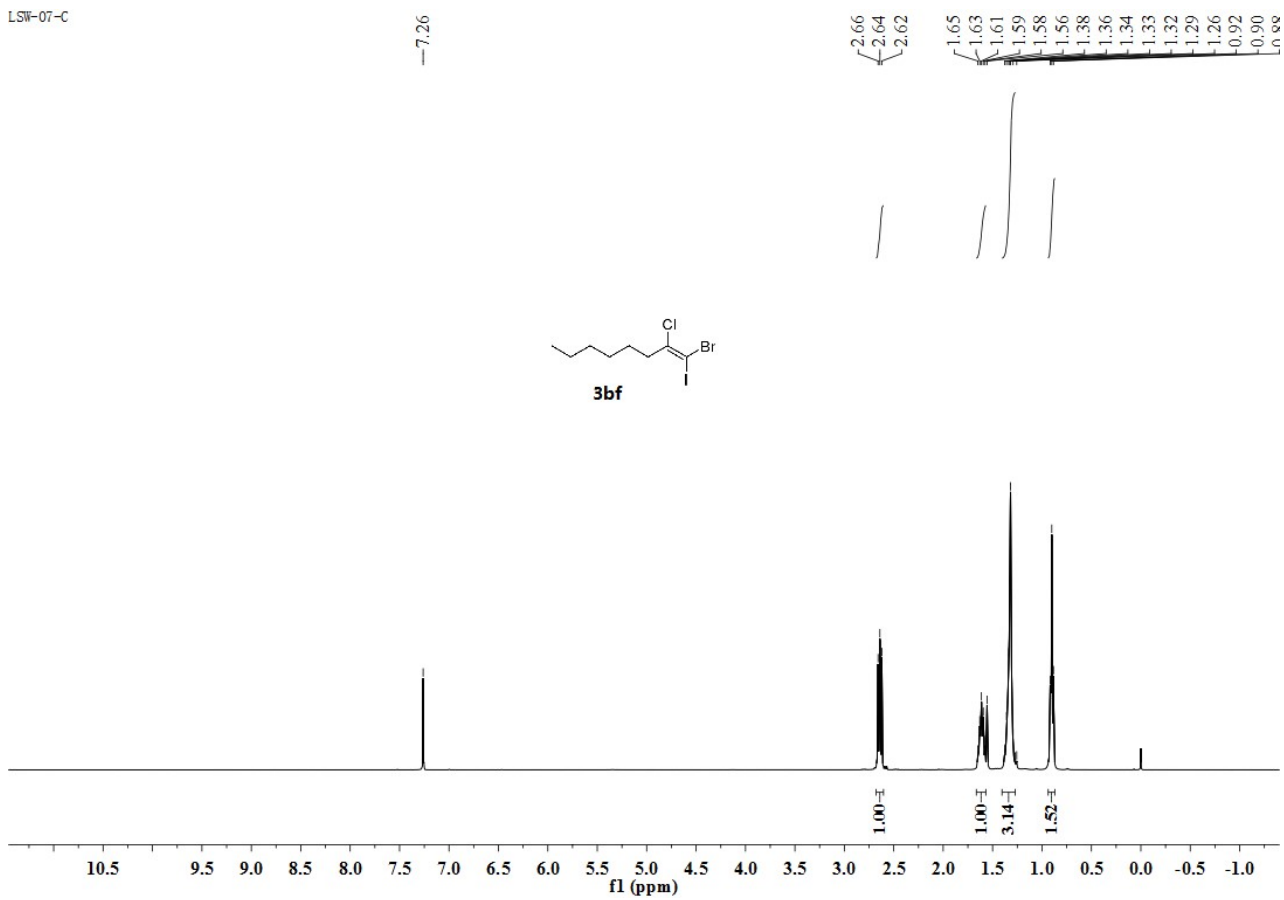

LSW-7C

—139.39

—48.64

—41.96

—31.51

—28.23

—27.10

—22.52

—14.06

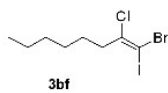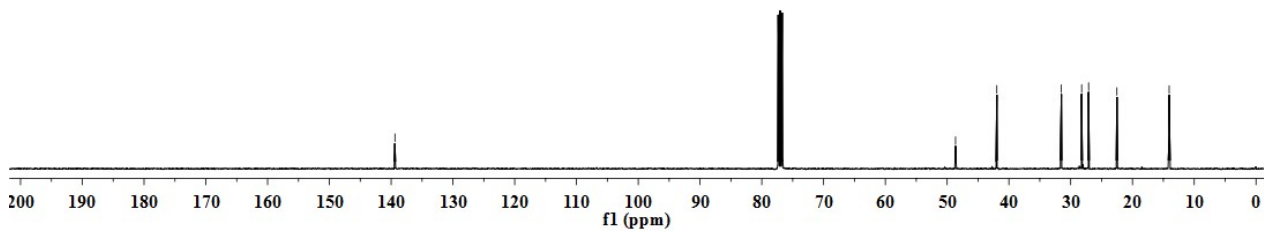

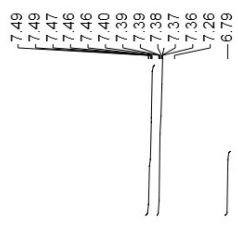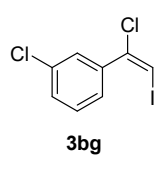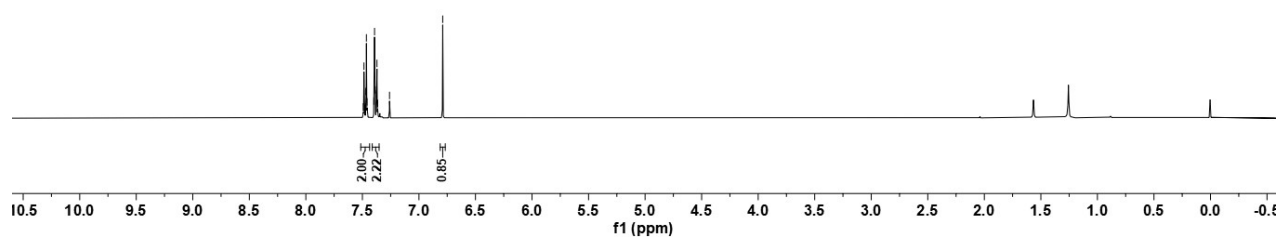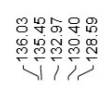

73.21

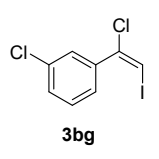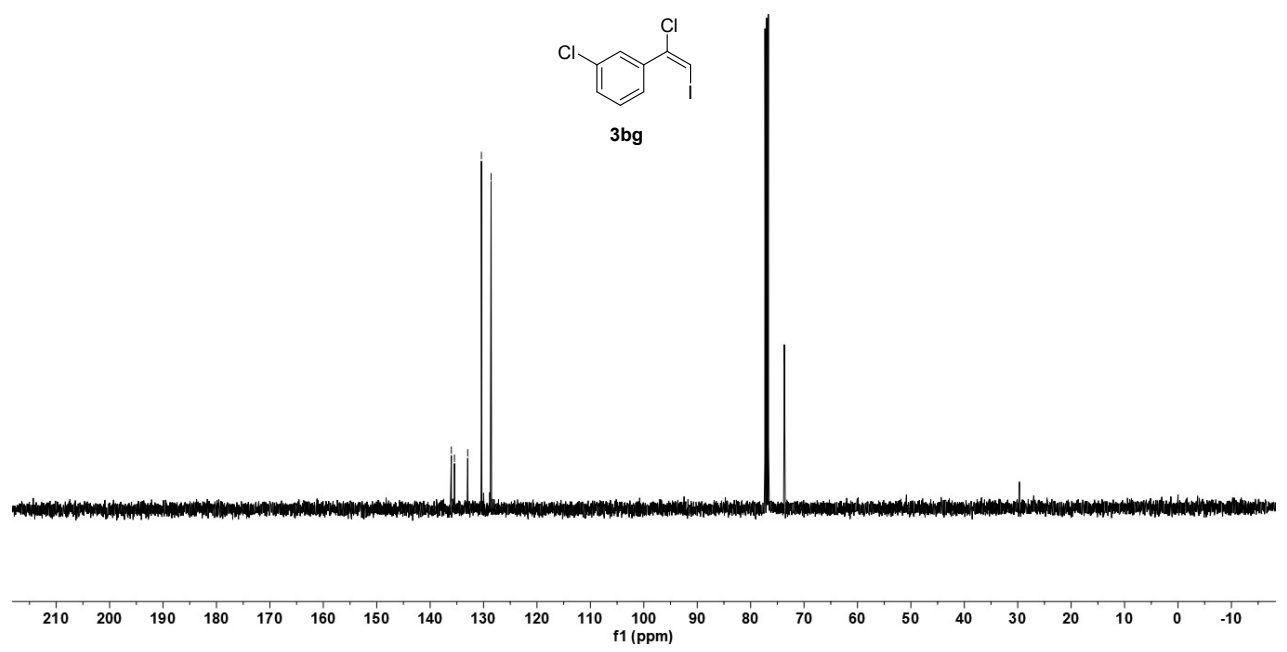

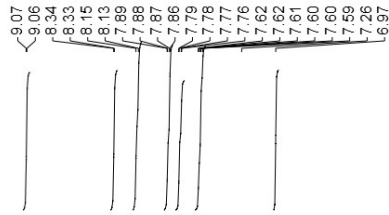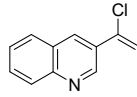

**3bh**

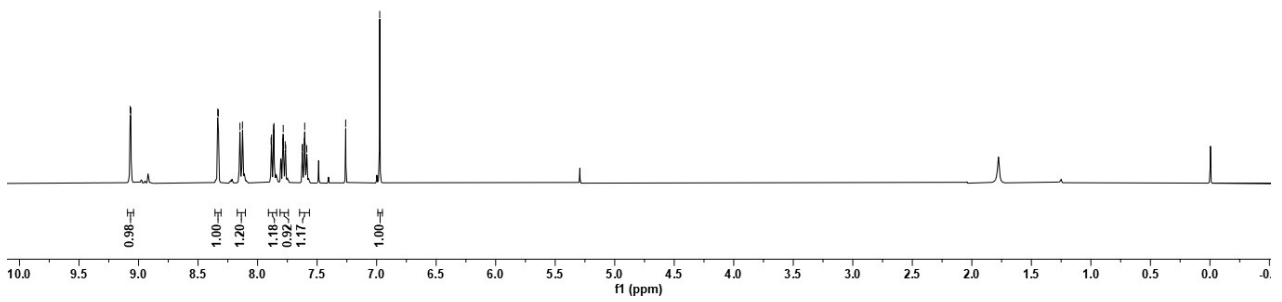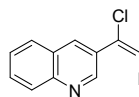

**3bh**

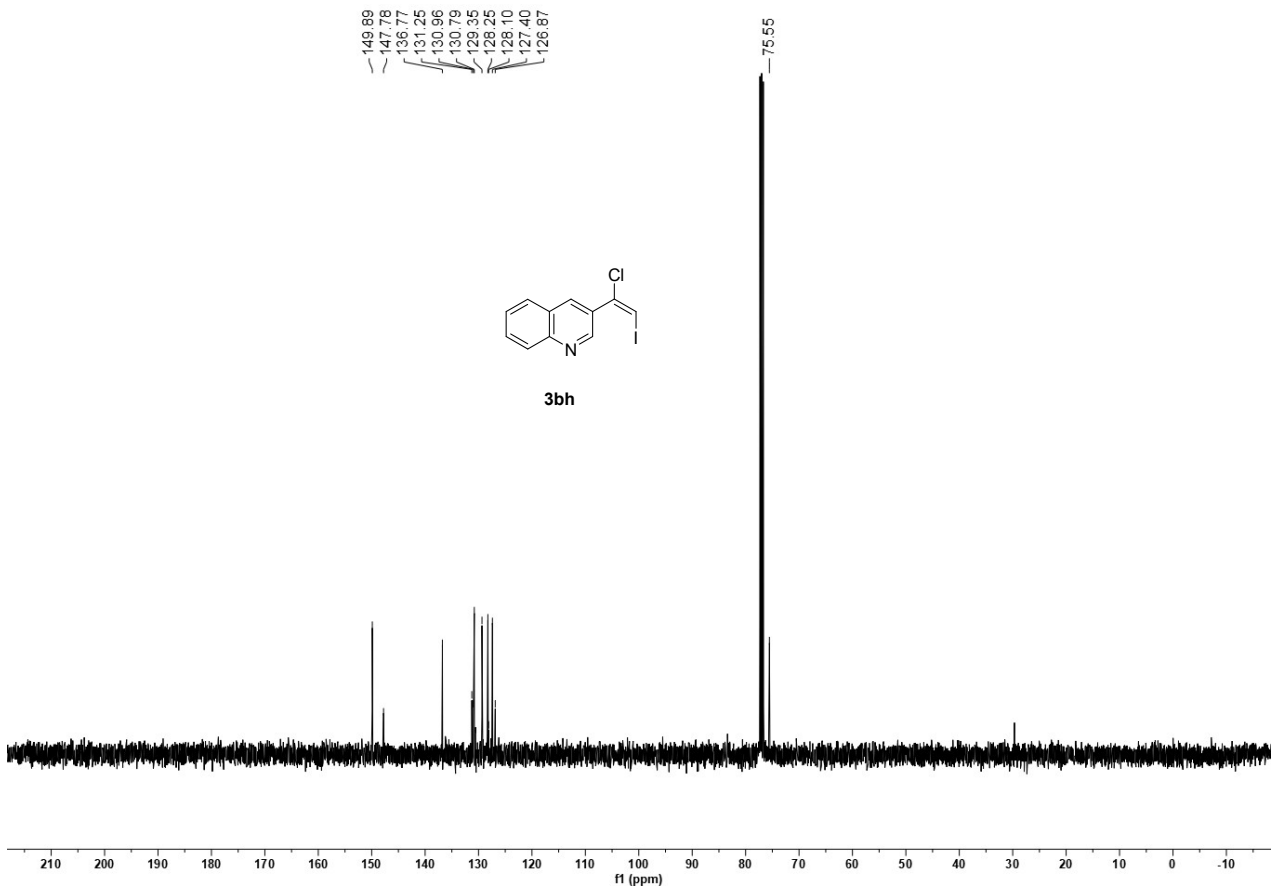

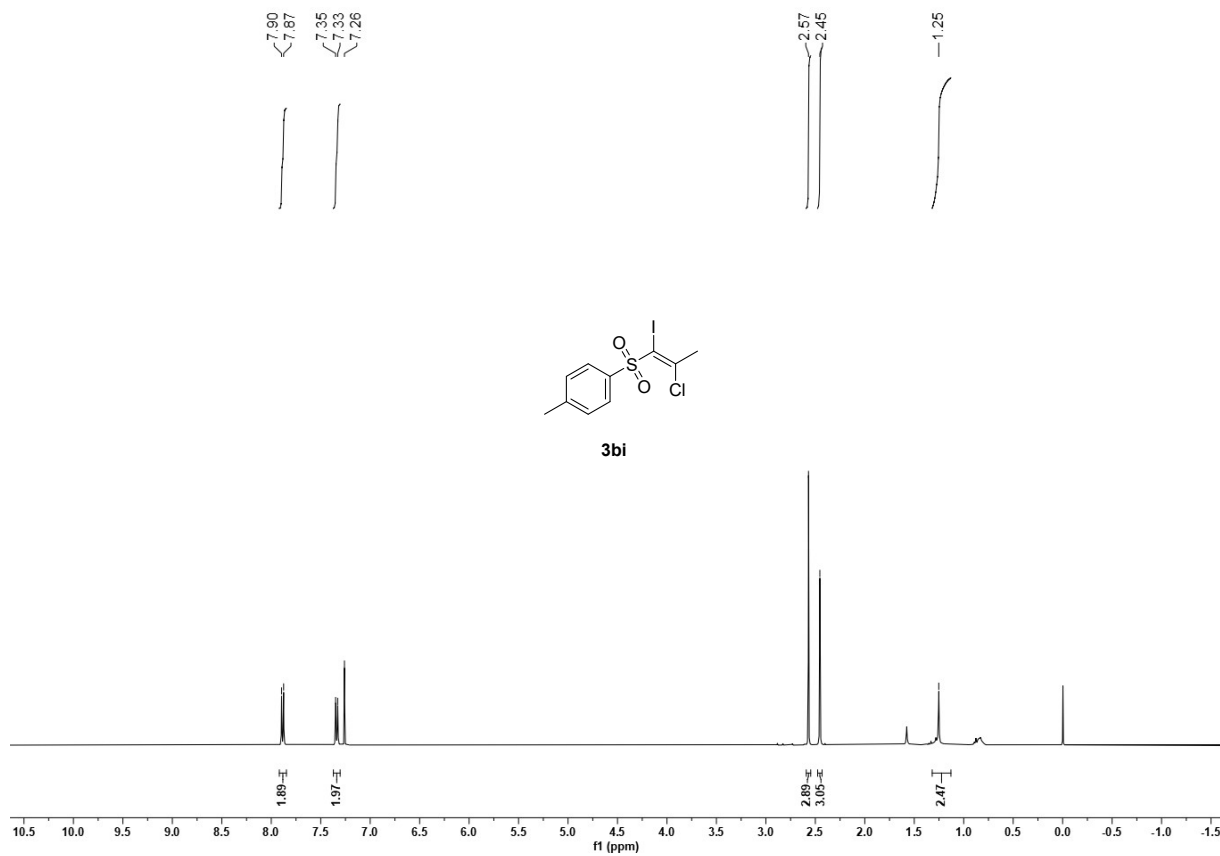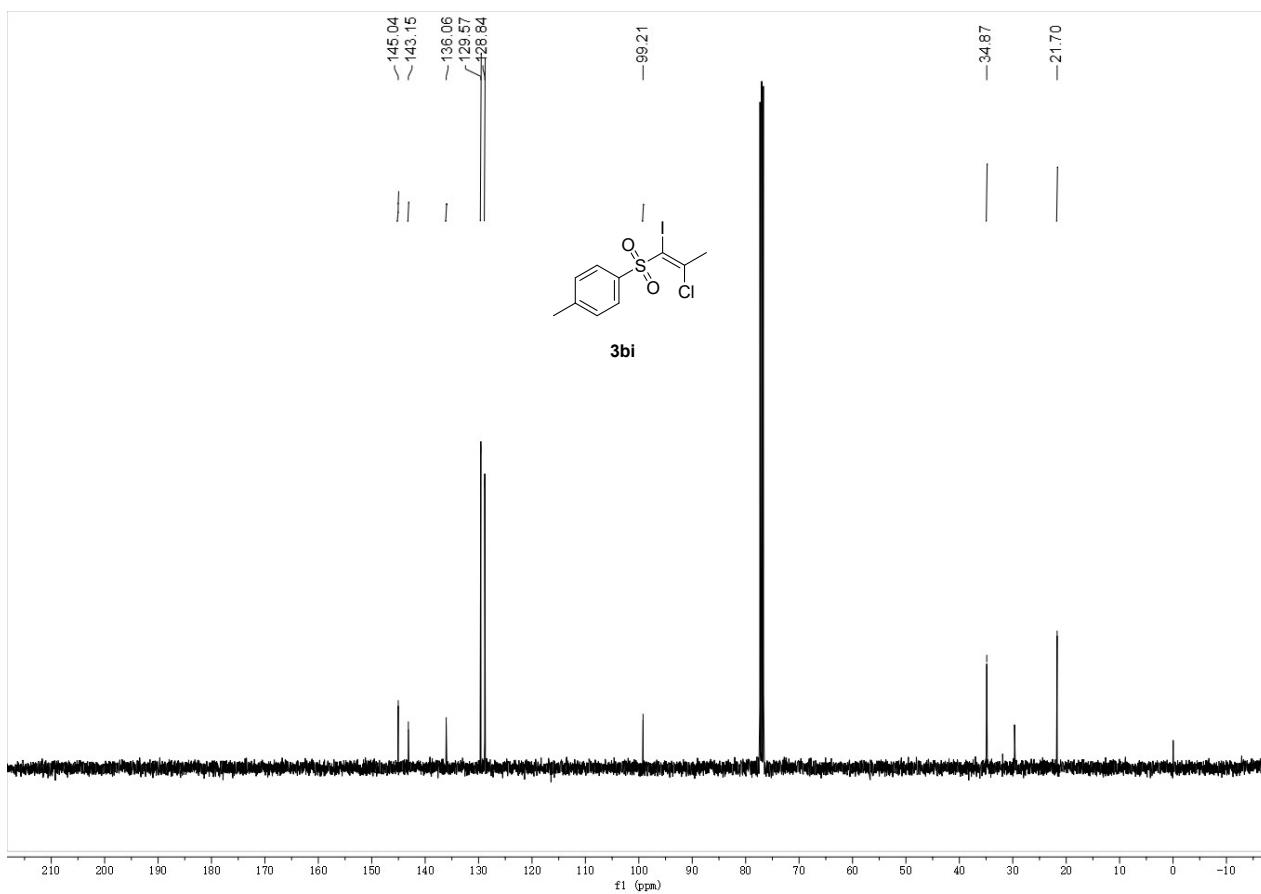

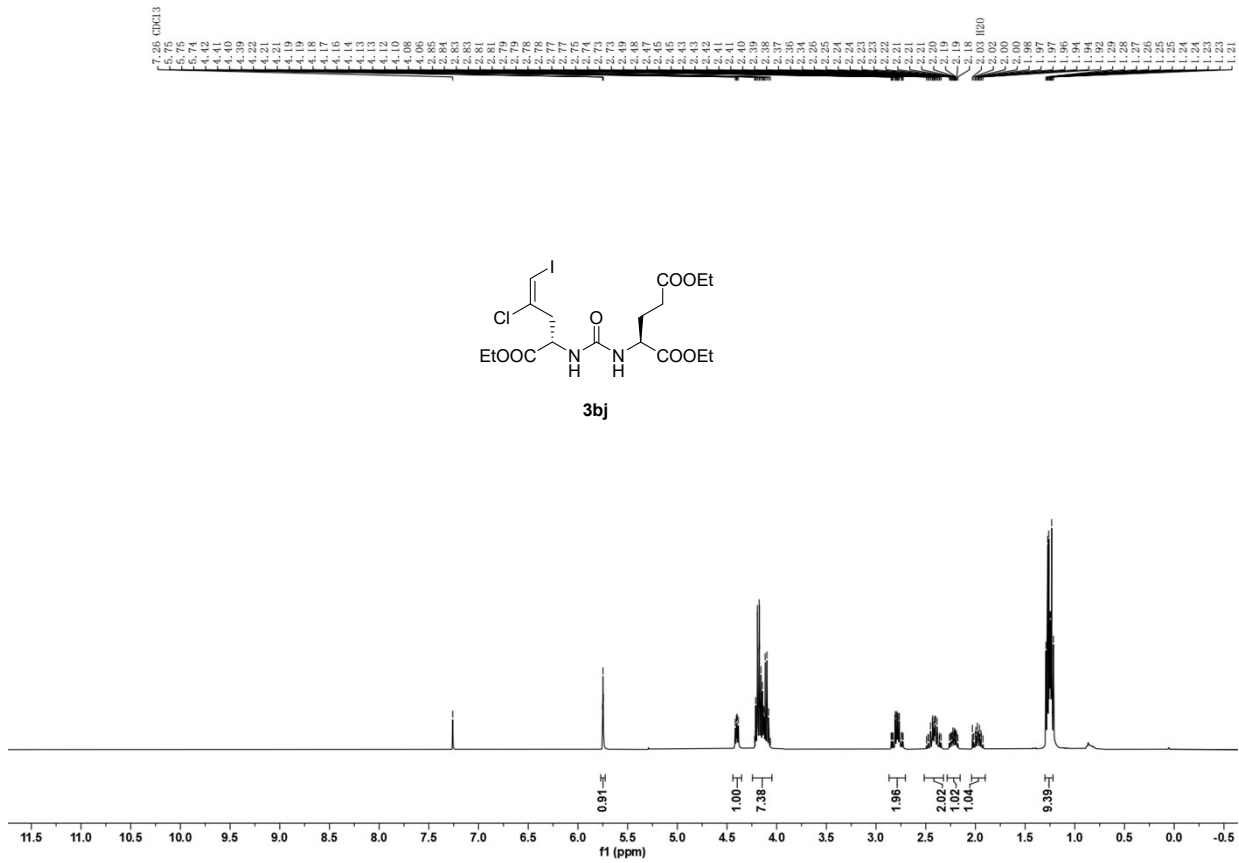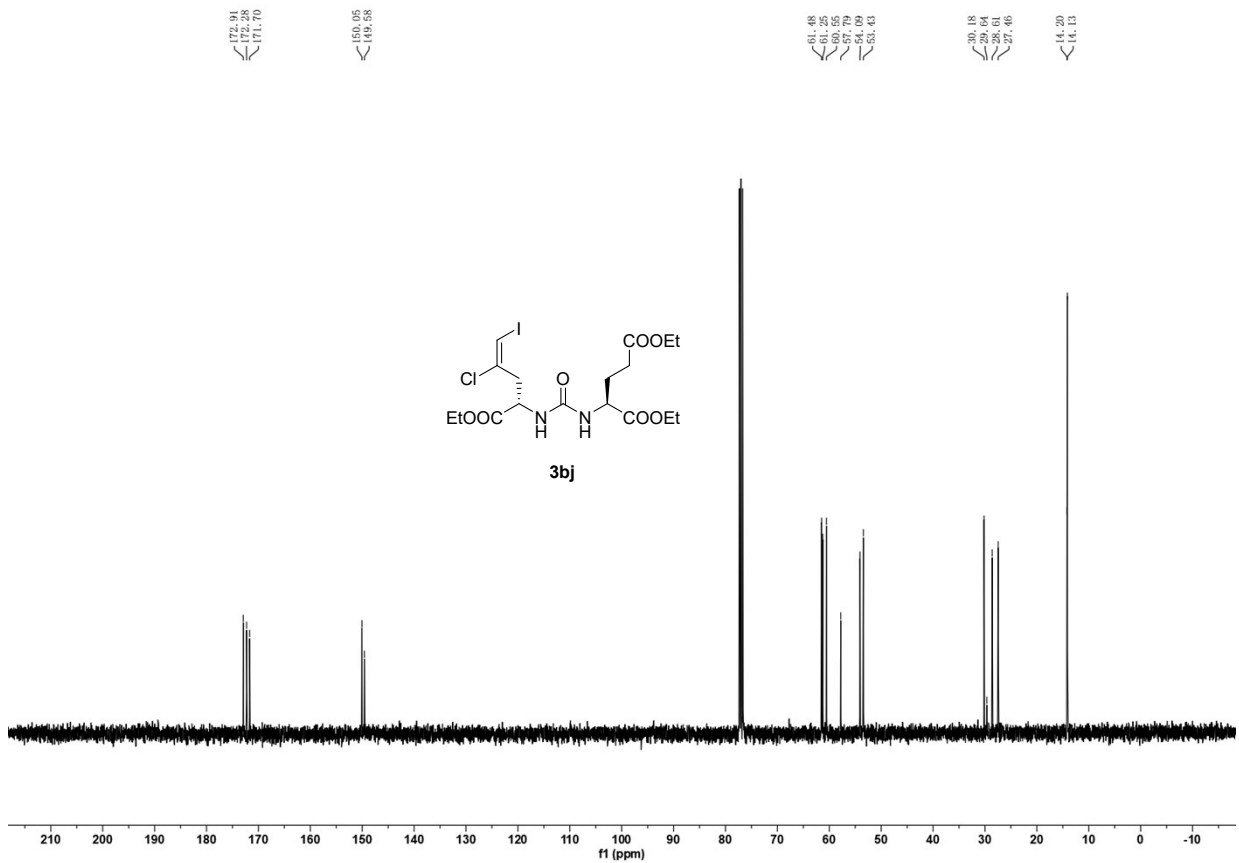



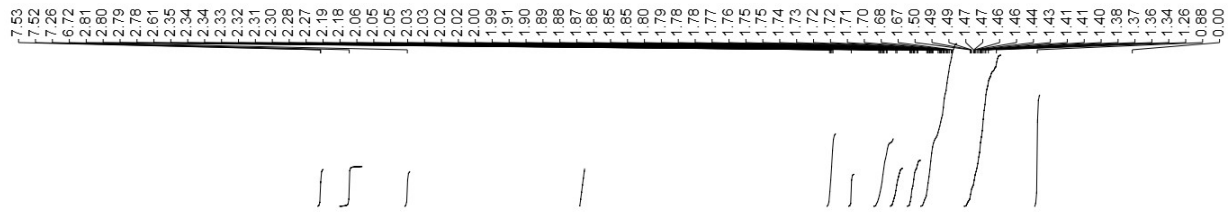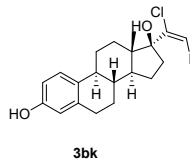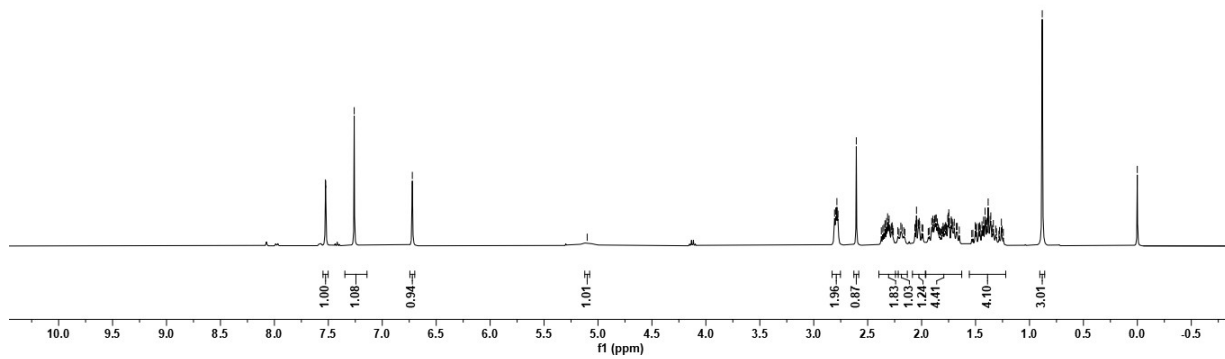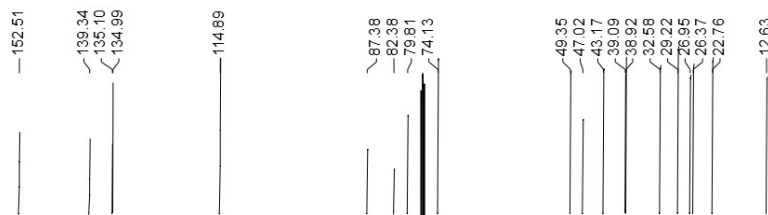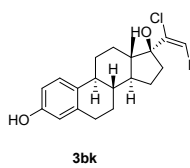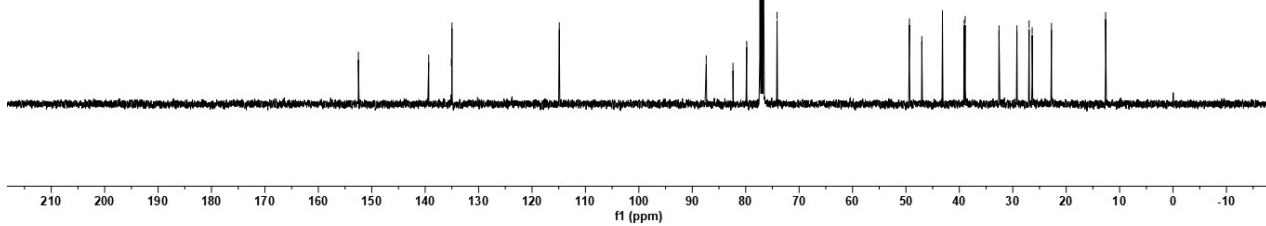

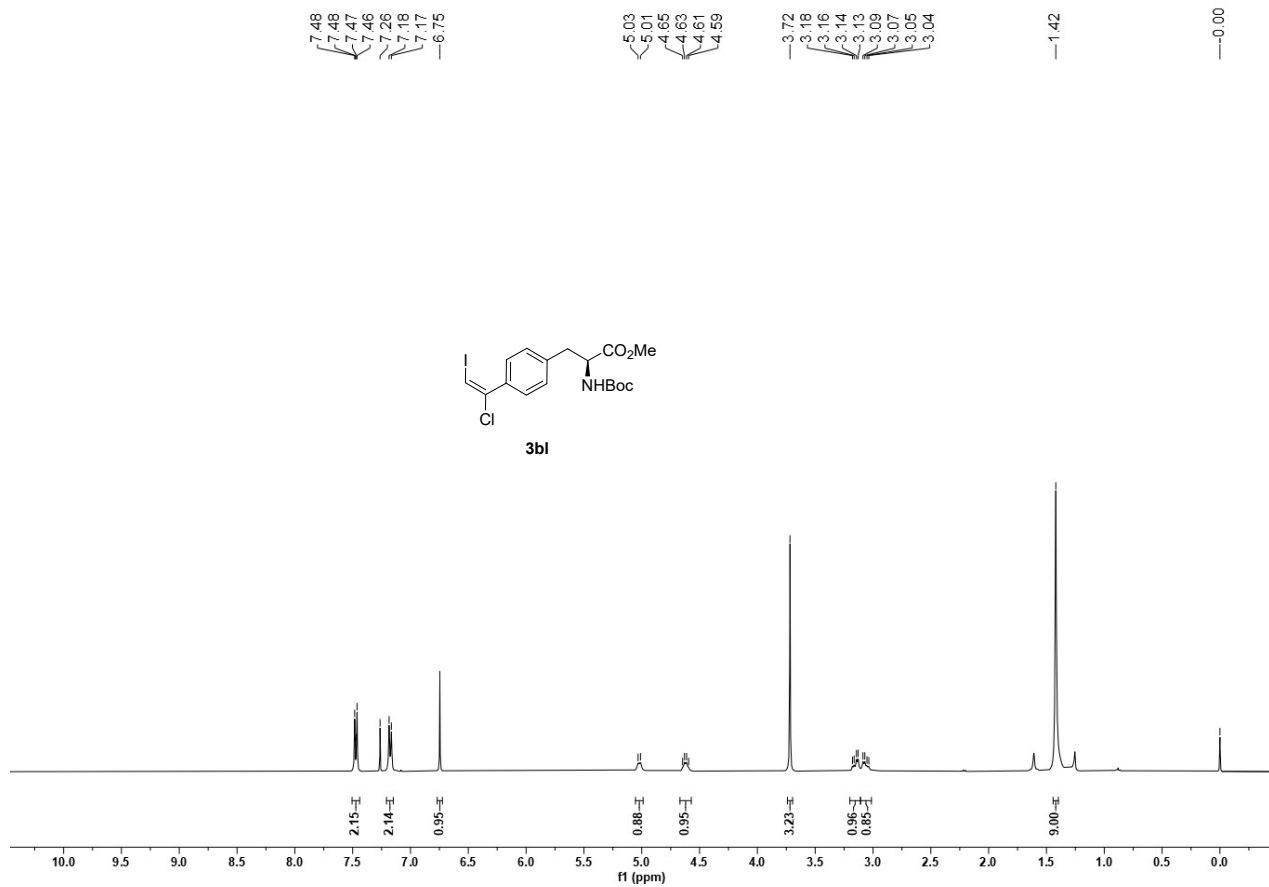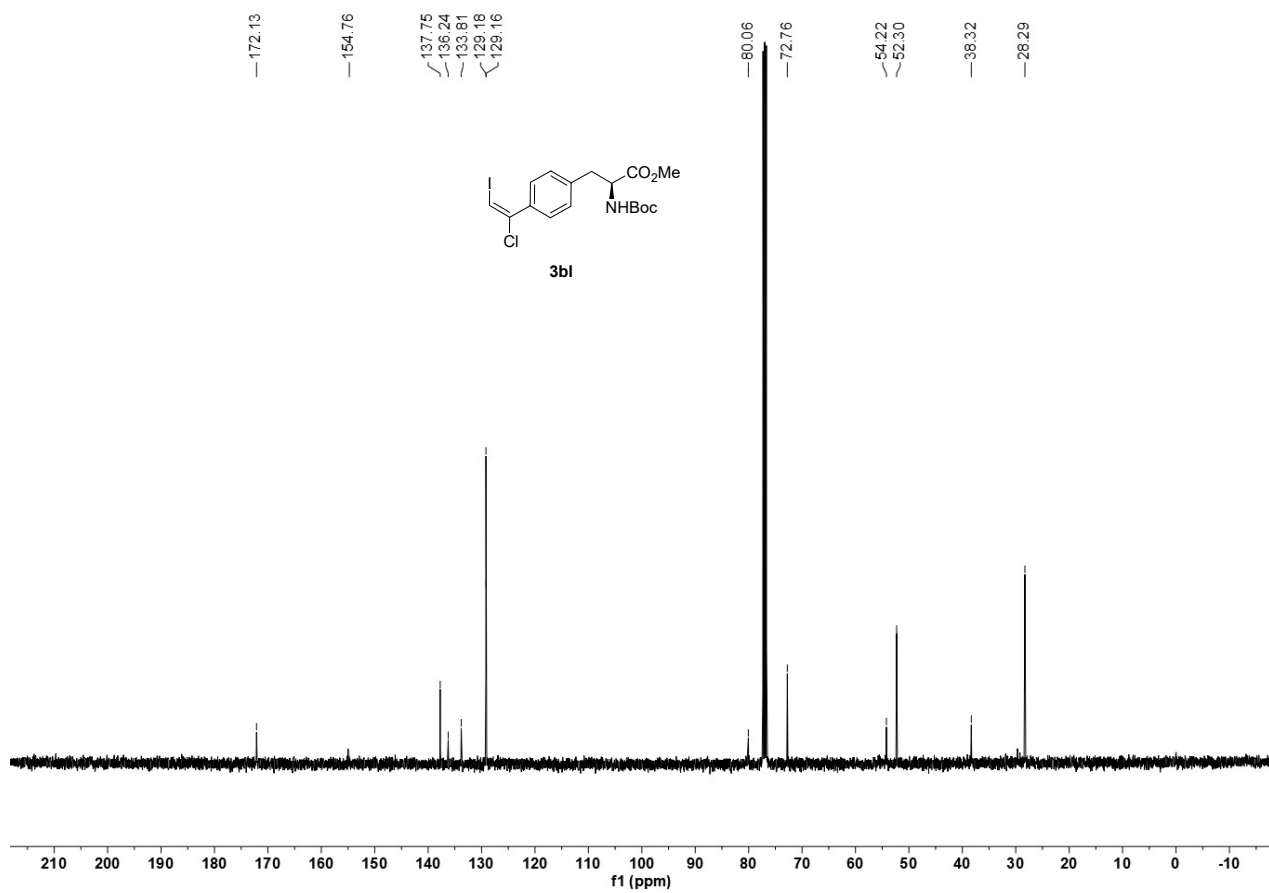

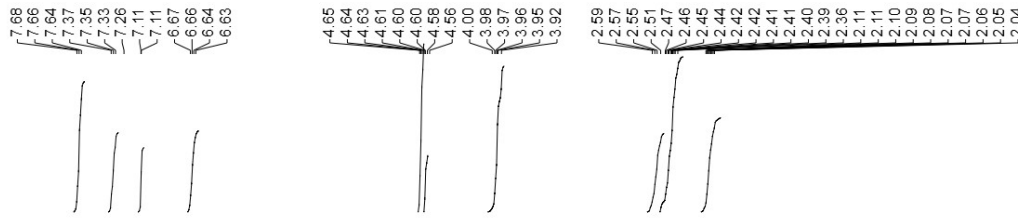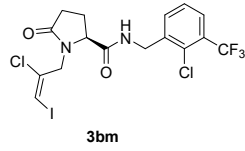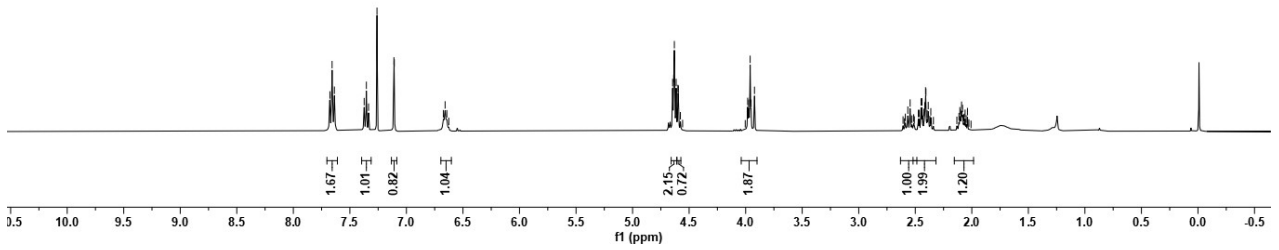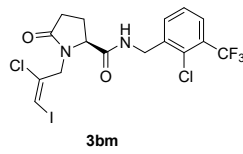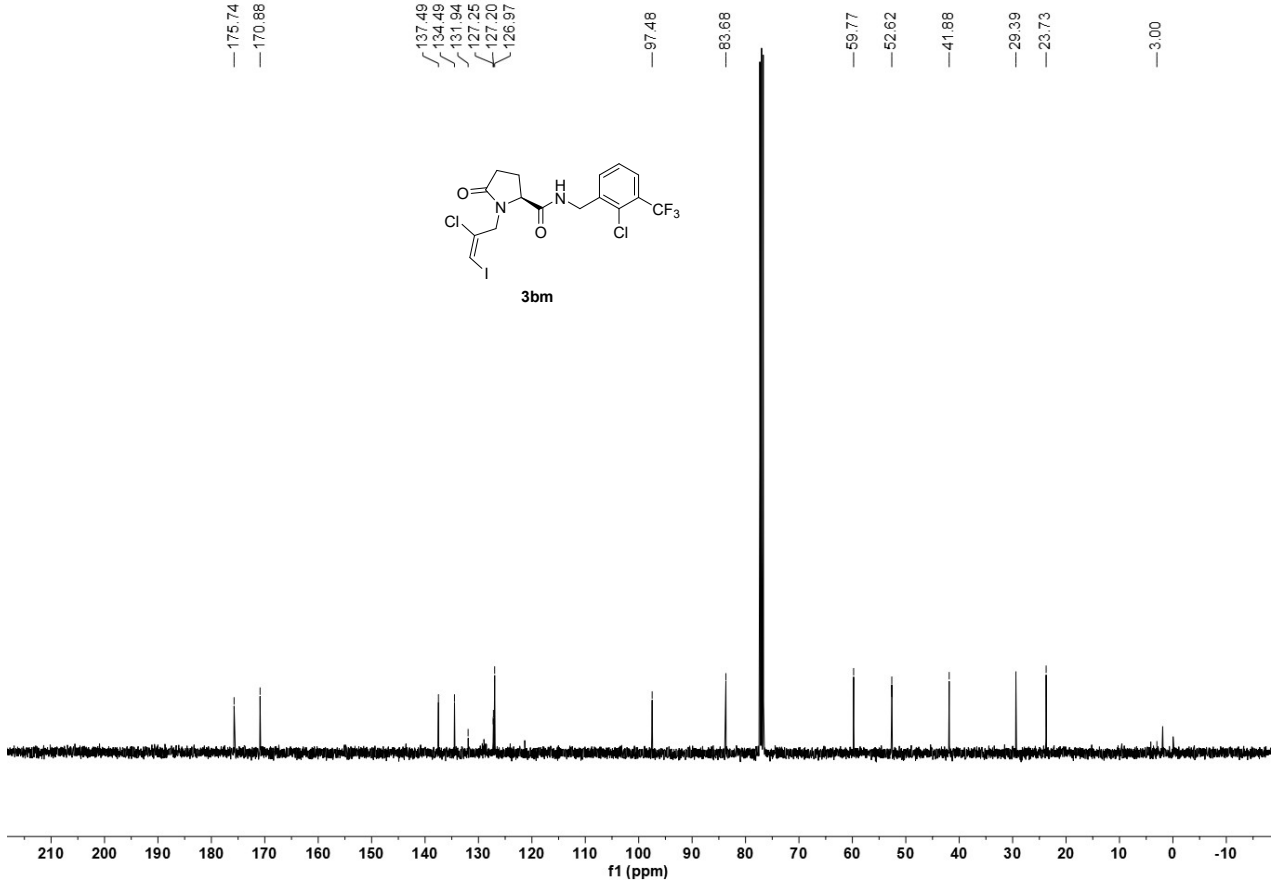

1sw-que-me

7.39  
7.38  
7.37  
7.36  
7.35  
7.34  
7.33  
7.32  
7.31  
7.30  
7.25

-2.75

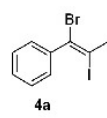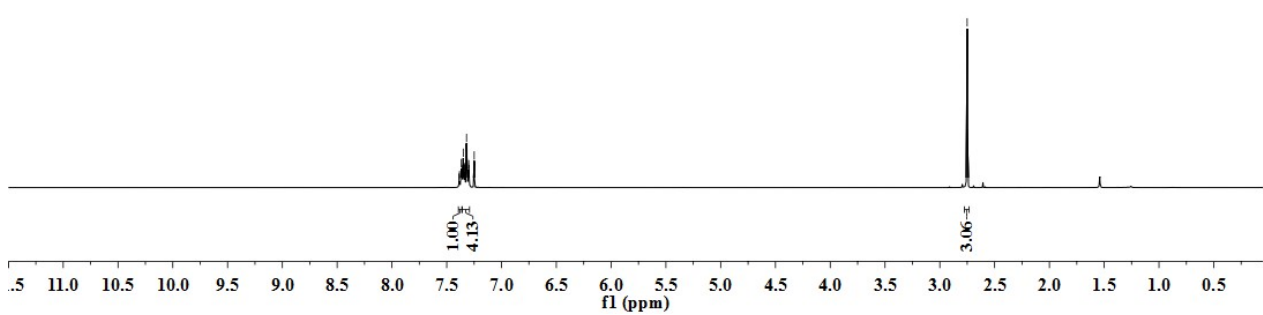

1sw-que-me

—143.83  
—129.09  
—128.67  
—128.36  
—118.33  
—93.07  
—34.50

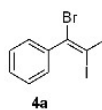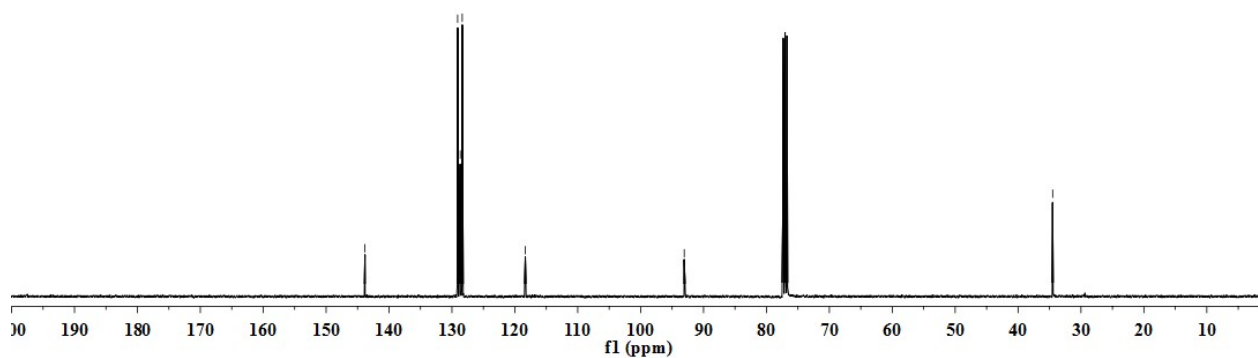

LSW-7D

7.39  
7.39  
7.37  
7.36  
7.35  
7.34  
7.34  
7.33  
7.32  
7.32  
7.31  
7.30  
7.30  
7.29  
7.28  
7.25

2.85  
2.83  
2.81

1.75  
1.73  
1.71  
1.70  
1.68  
1.55  
1.04  
1.02

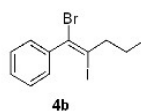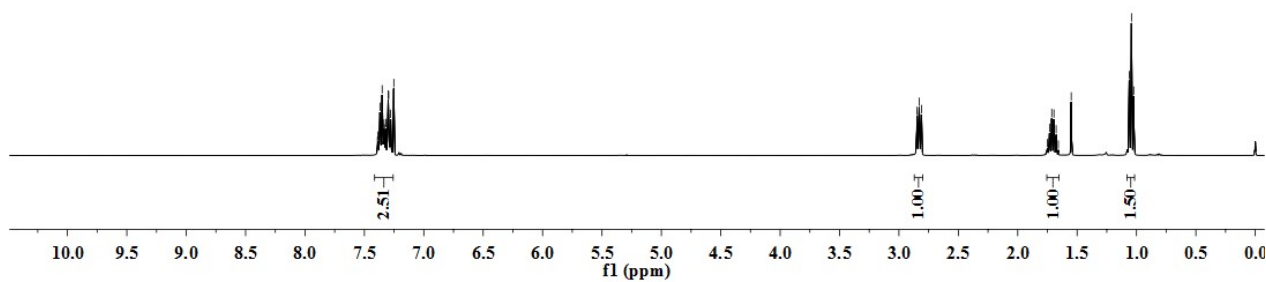

LSW-7D

—144.09  
—129.10  
—128.61  
—128.38  
—117.60  
—102.24  
—46.83  
—21.83  
—12.91

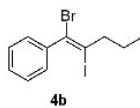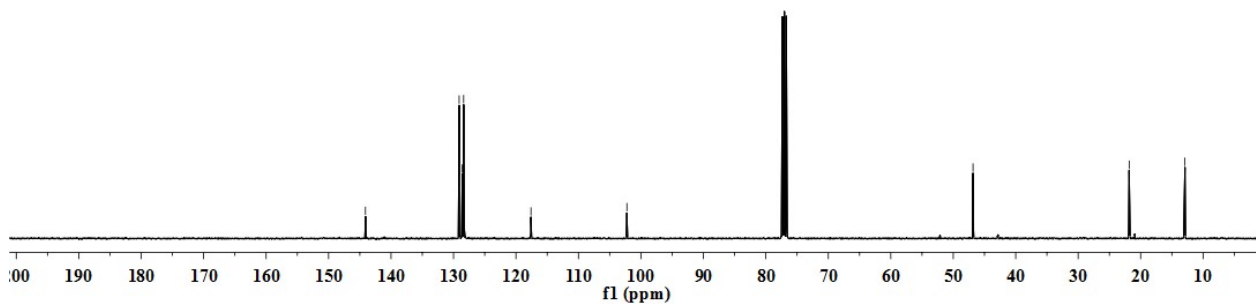

lsw-funan-br-i

7.55  
7.53  
7.46  
7.44  
7.32  
7.29  
7.28  
7.21  
7.19  
7.17  
7.10

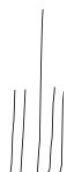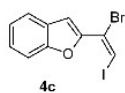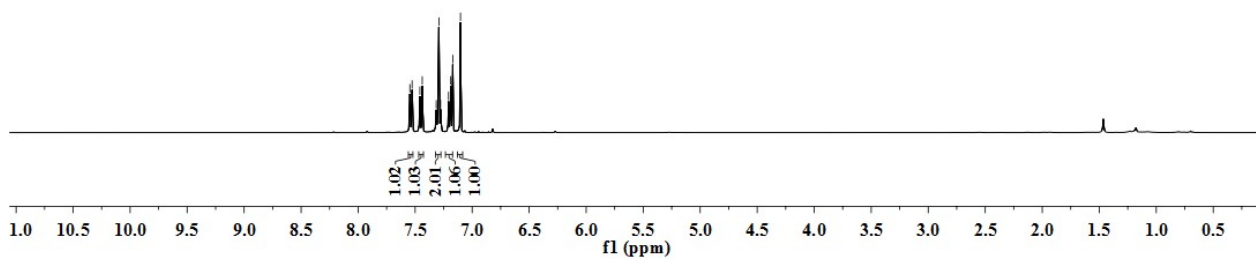

lsw-funan-br-i

154.68  
150.80

127.63  
126.16  
123.52  
121.83  
111.69  
111.32  
110.92

74.11

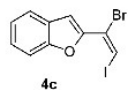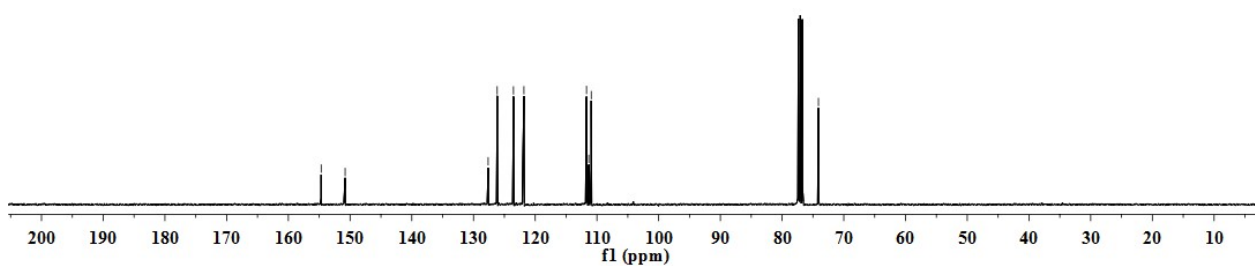

LSW-4BR-I-I

7.55  
7.53  
7.42  
7.40  
7.26  
6.79

1.55

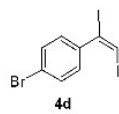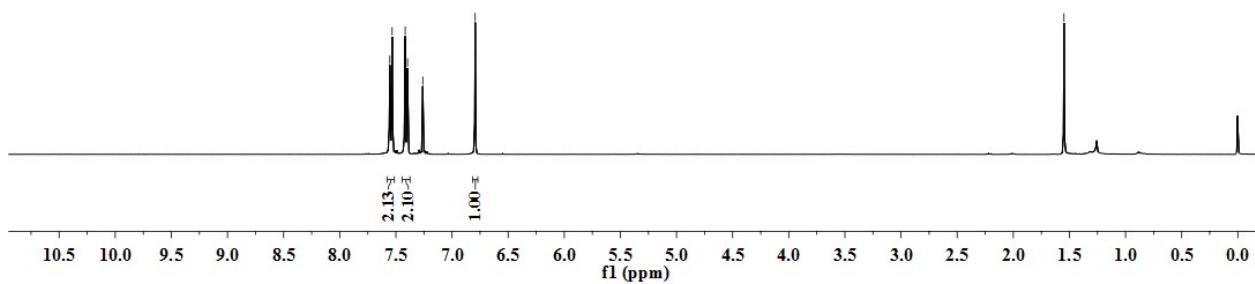

LSW-4BR-CL-I

136.55  
133.04  
131.58  
130.63  
123.77

73.67

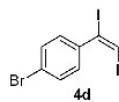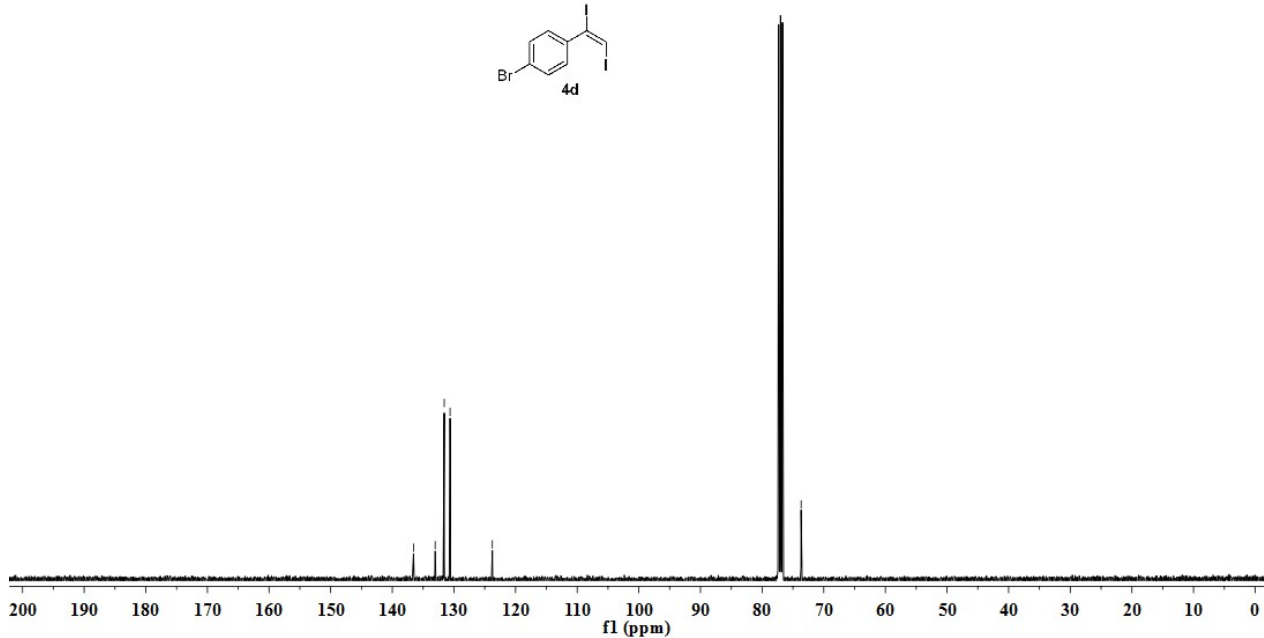

LSW-2I

7.36  
7.33  
7.26

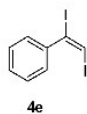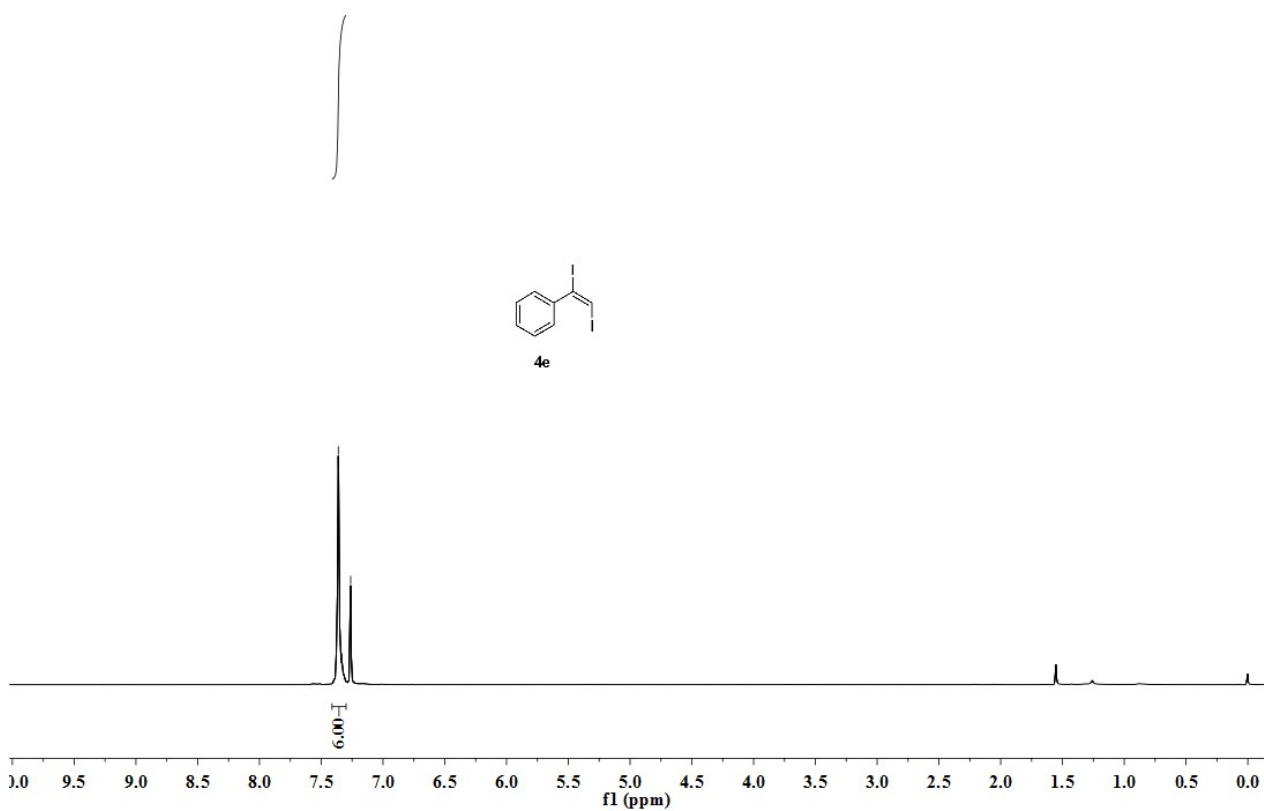



LSW-2I

143.10

128.99  
128.52  
128.46

96.18

80.83

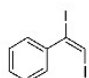

4e

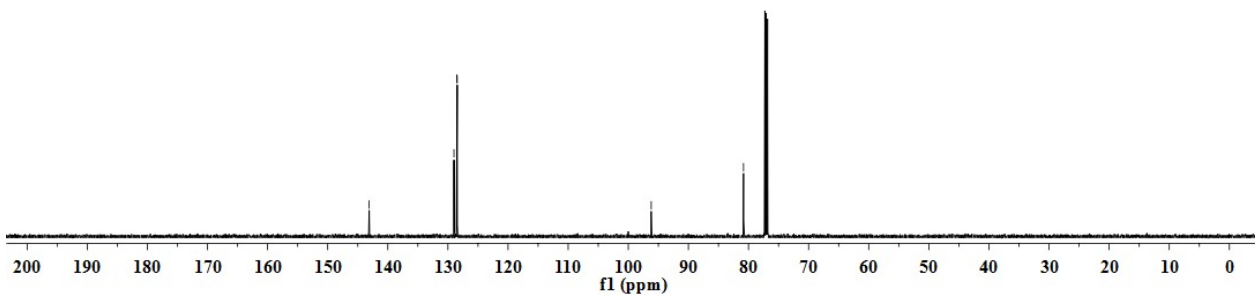

LSW-PH-QUE-BR-BR

7.53  
7.51  
7.43  
7.42  
7.40  
7.38  
7.37  
7.35  
7.26  
6.81

1.55

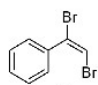

4f

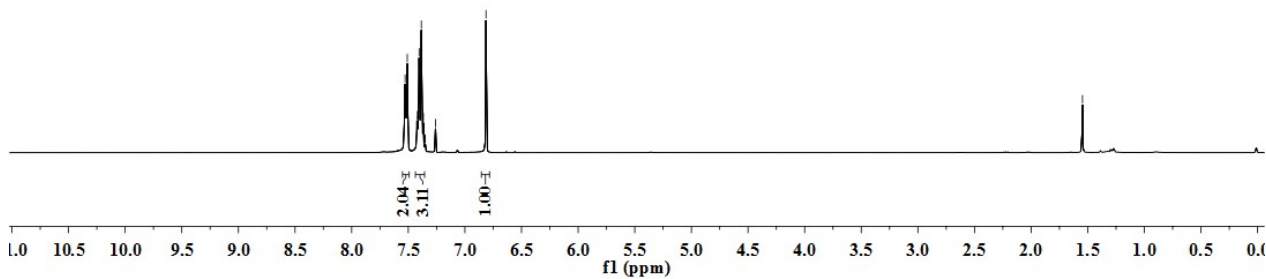

LSW-PHQE-2BR

137.07  
129.40  
129.16  
128.28  
121.35  
103.02

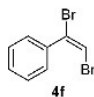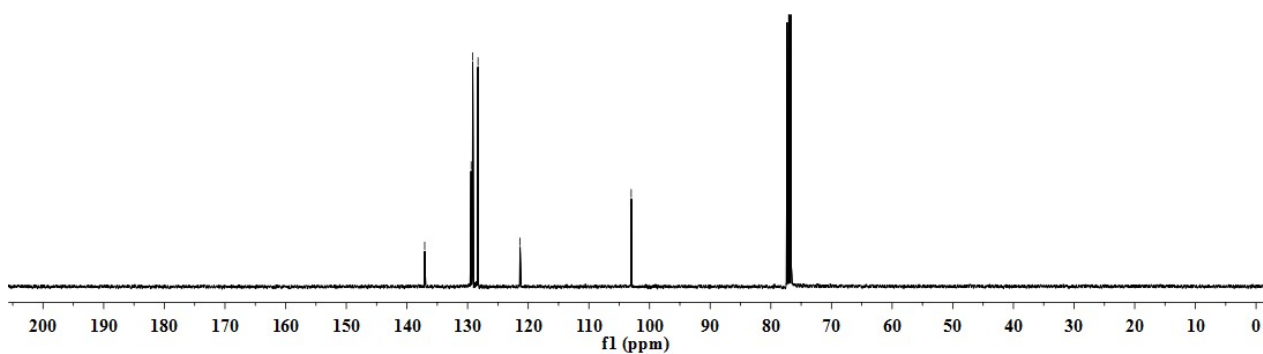

LSW-QUE-SI-2CL

7.37  
7.36  
7.35  
7.32  
7.31  
7.26

1.54

0.00  
-0.05

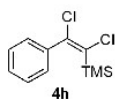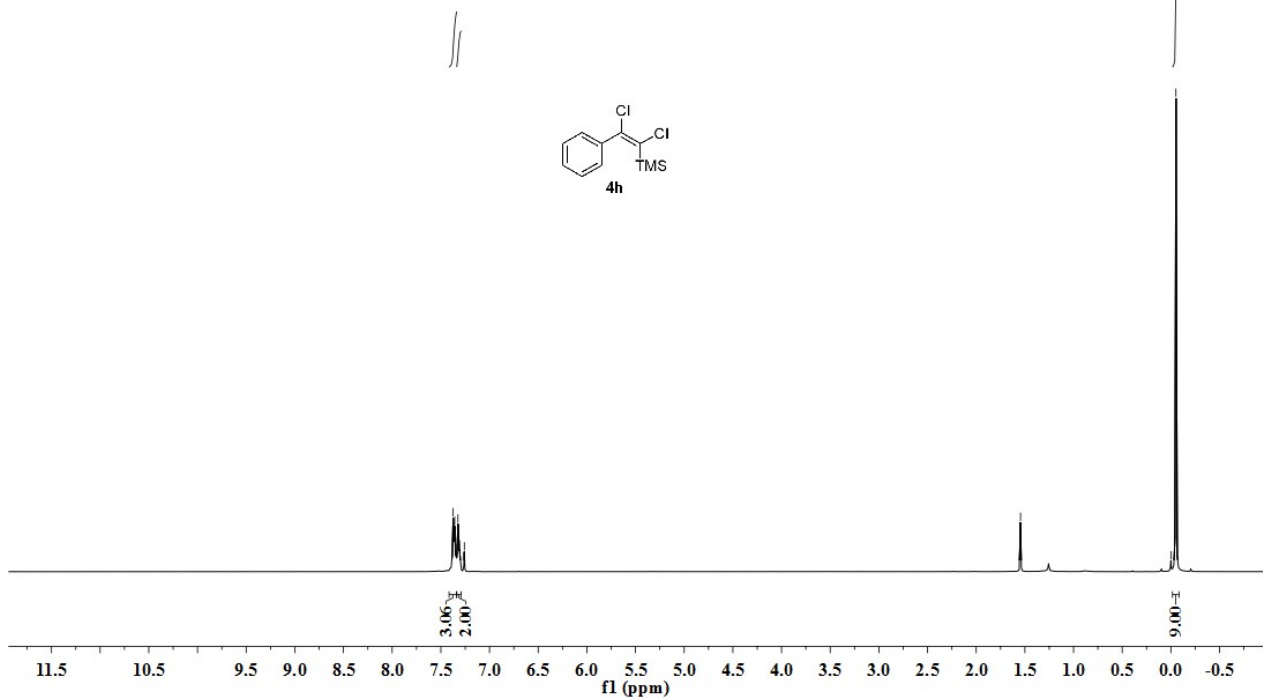

1sm-que-si-2c1

139.50  
138.63  
134.71  
129.48  
129.42  
128.35

-0.65

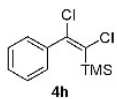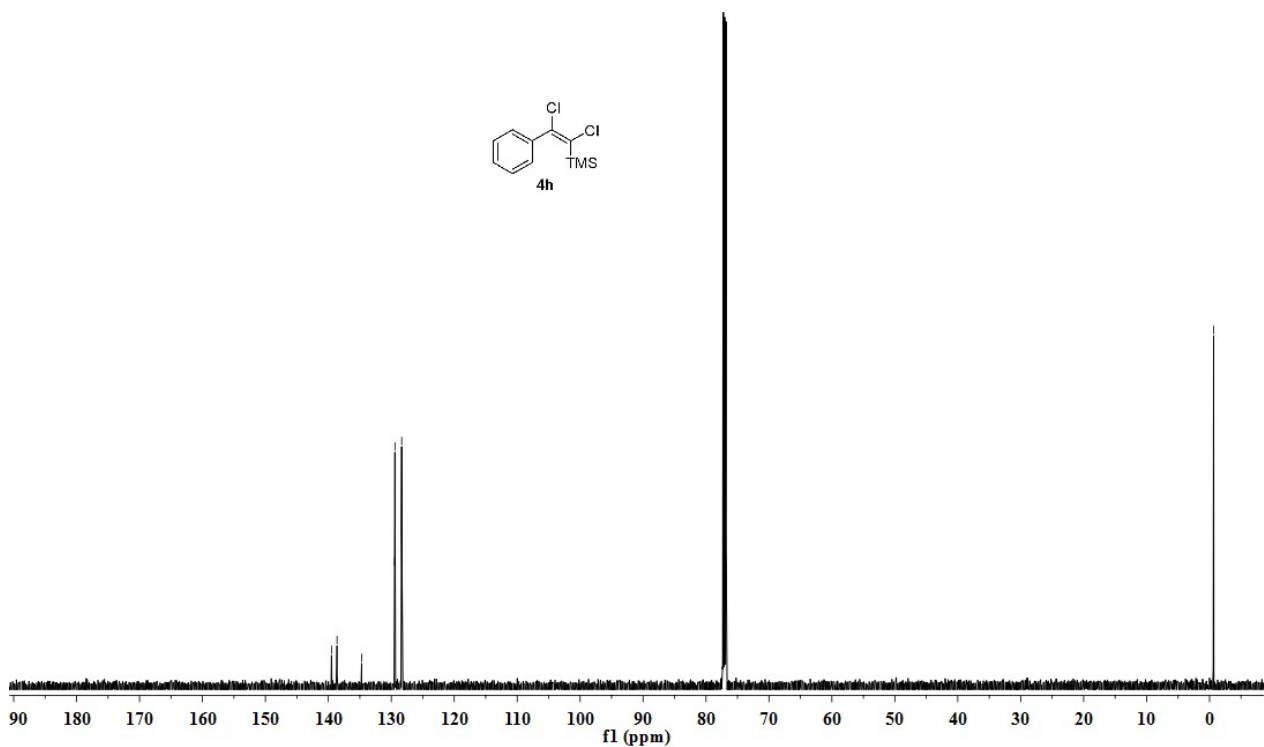

1sm-02

7.50  
7.50  
7.49  
7.49  
7.47  
7.47  
7.46  
7.46  
7.28

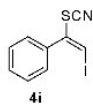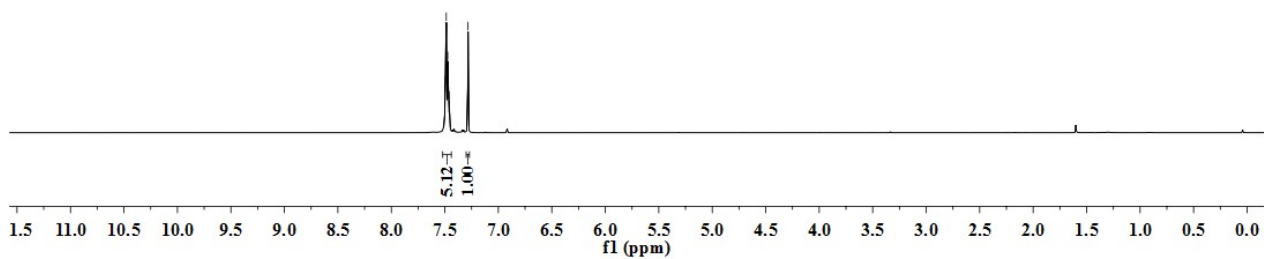

1sw-scnc1-i

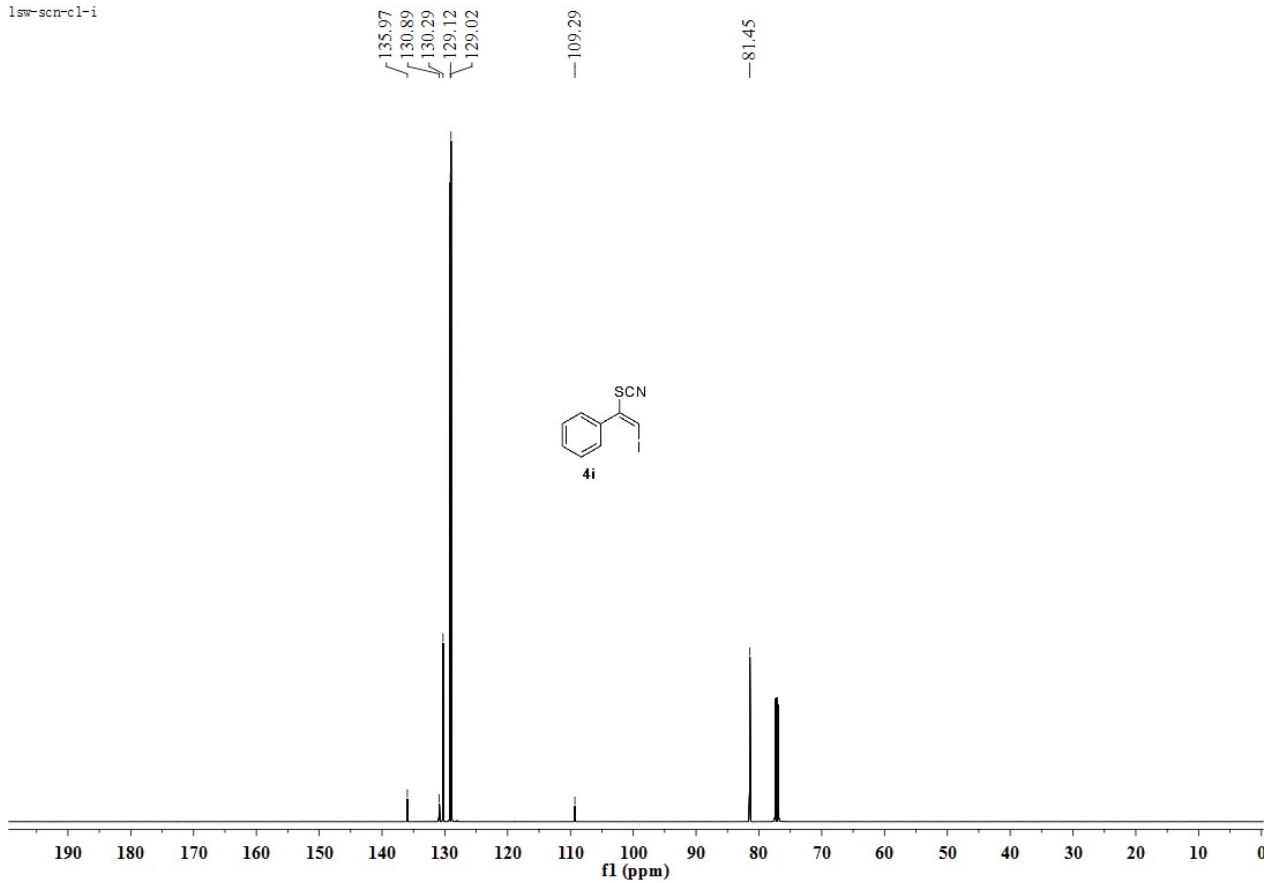

LSW-OAC-23

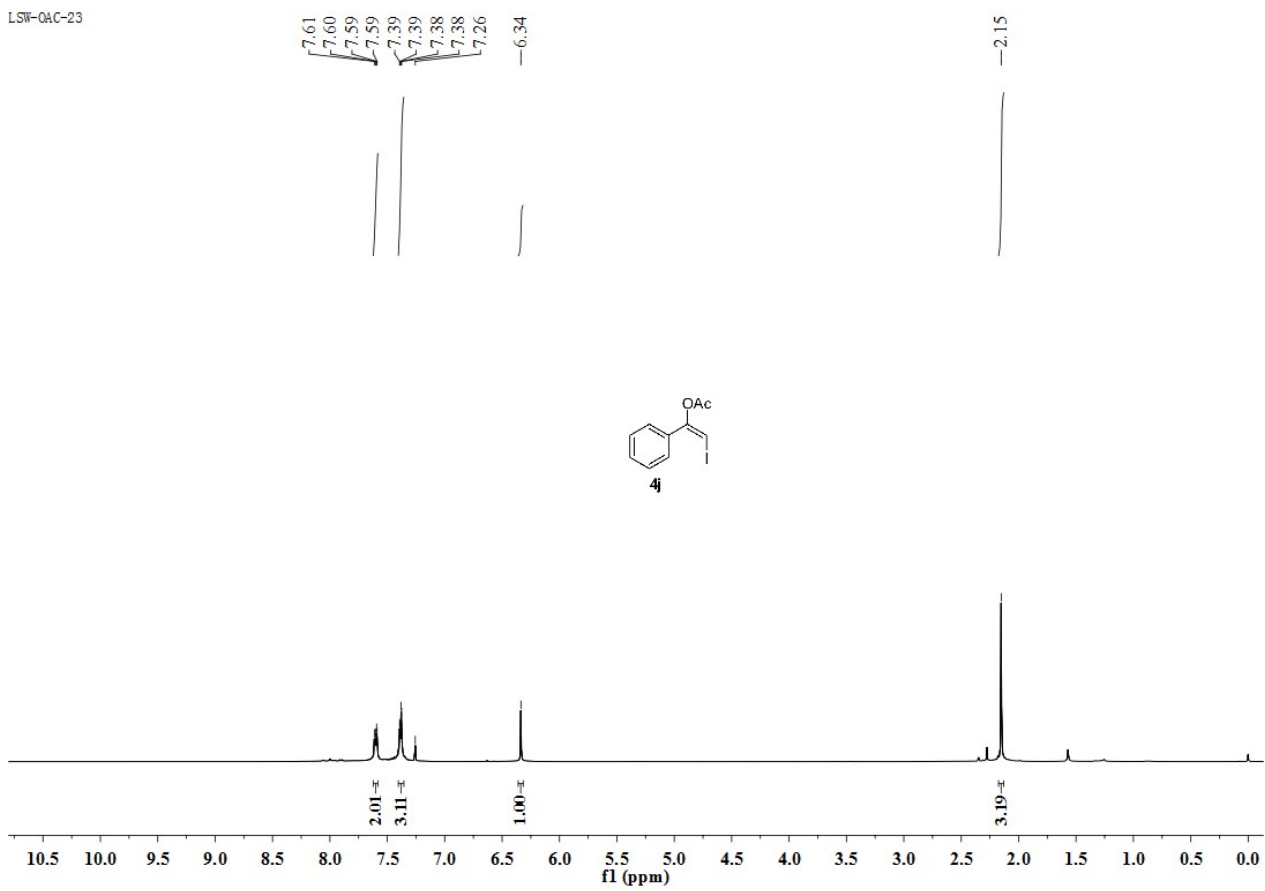

LSW-OAC-23

—168.54

—151.24

134.51  
129.51  
128.86  
128.18

—67.07

—20.84

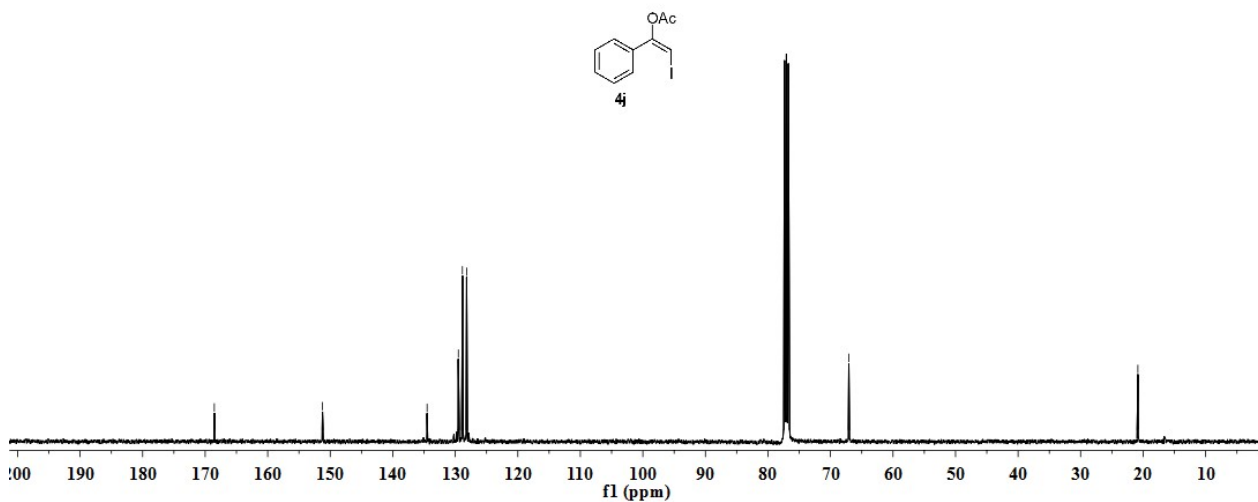

LSW-4F-CL-I

7.58  
7.37  
7.36  
7.36  
7.35  
7.26  
7.10  
7.08  
7.06

5.08  
5.06  
5.05  
5.04

3.83  
3.81  
3.80  
3.79  
3.70  
3.68  
3.65

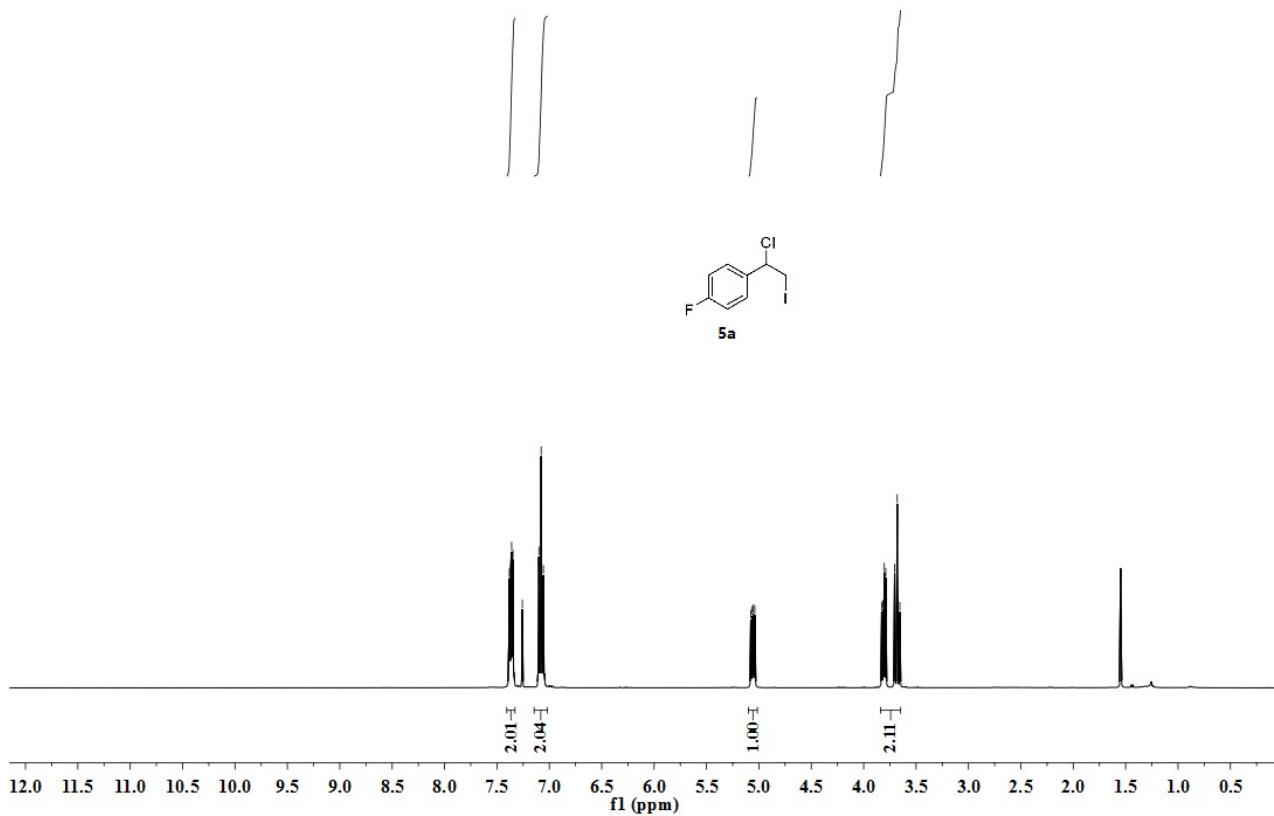

LSW-4-F-ENE-CL-I

163.71  
162.06

135.05  
135.02  
129.13  
129.07

115.89  
115.74

60.71

9.89

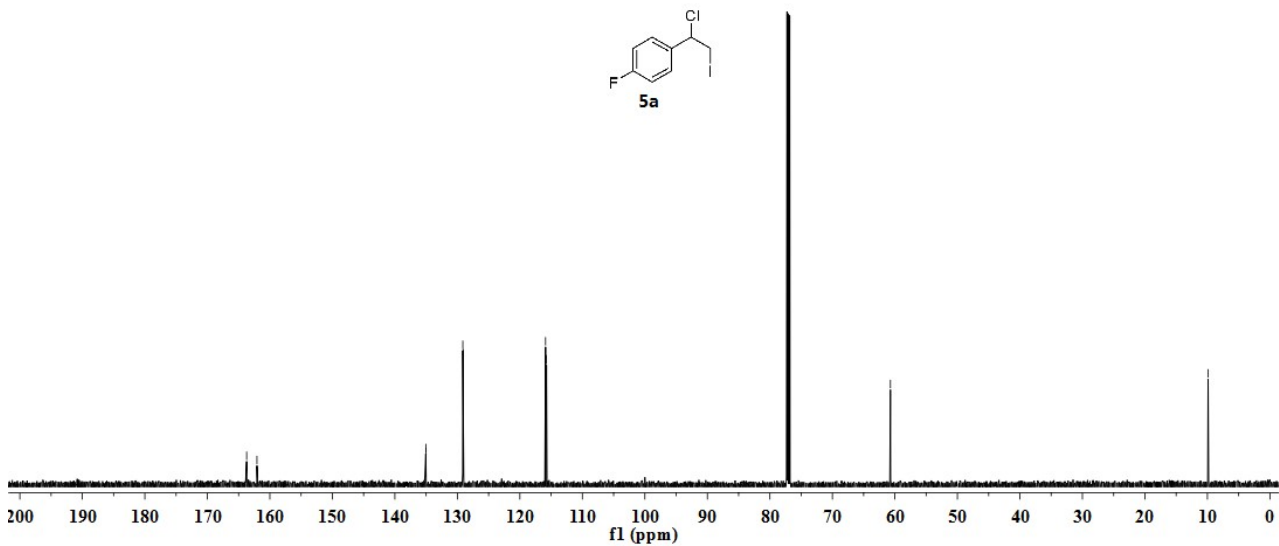

LSW-4BR-ENE-CL-I

7.53  
7.51  
7.27  
7.24

5.04  
5.02  
5.01  
5.00

3.81  
3.79  
3.78  
3.77  
3.69  
3.66  
3.64

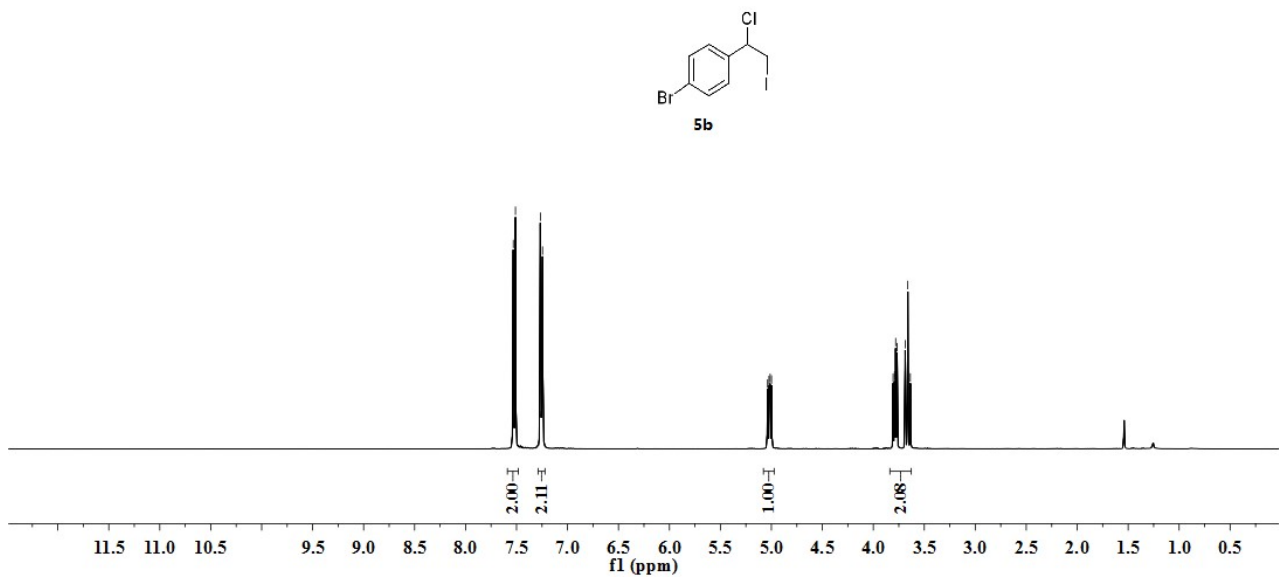

LSW-4-BR-ENE-CL-I

138.14  
132.00  
128.94  
123.20

-60.63

-9.45

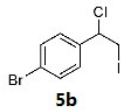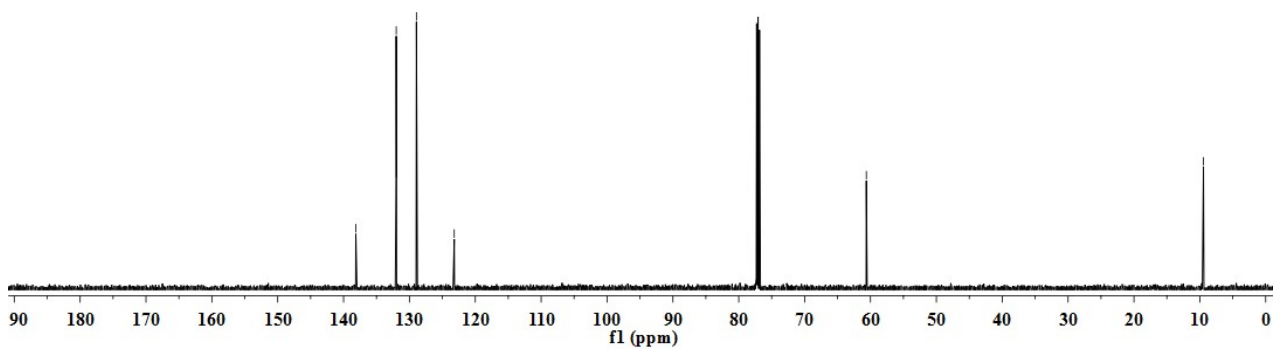

LSW-OAC-CL-I

7.45  
7.43

7.15  
7.13

5.17  
5.16  
5.15

4.10  
4.09  
4.08

4.07  
4.02  
4.00

3.99

-2.33

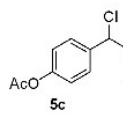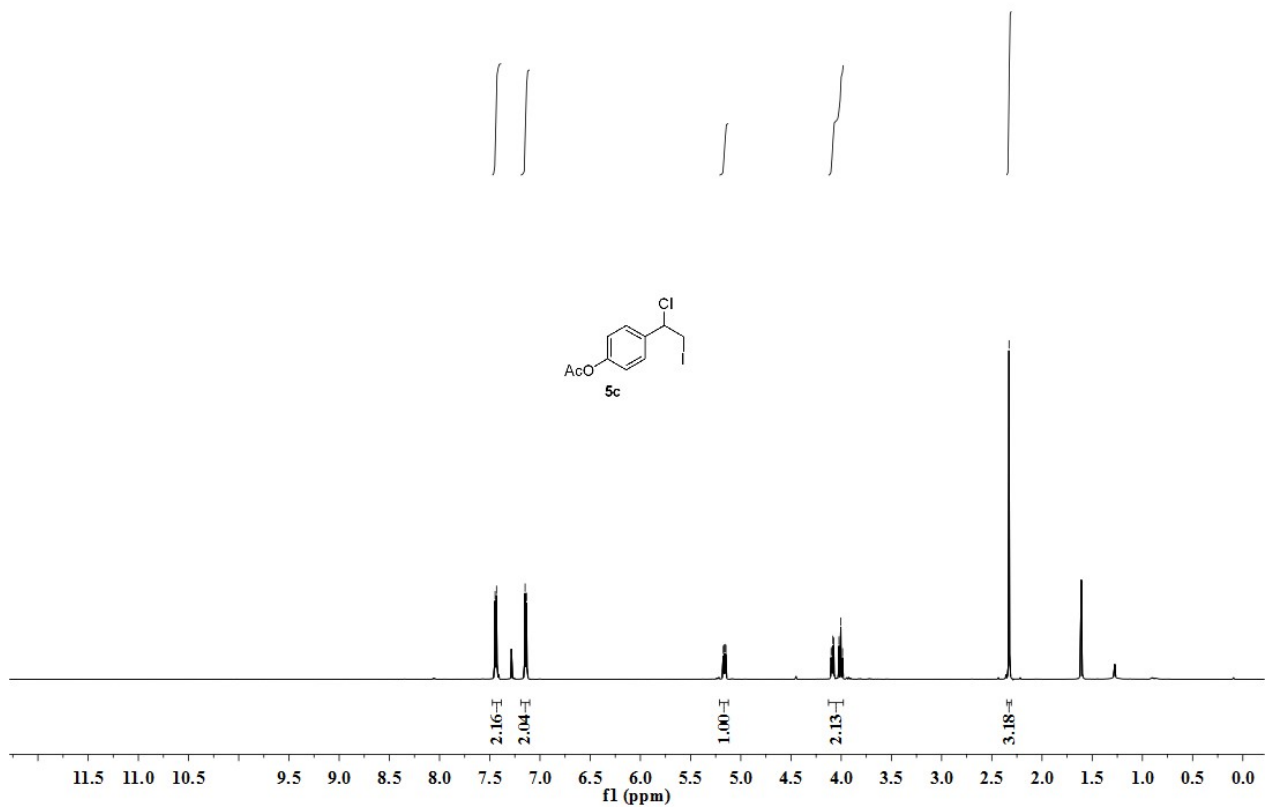

LSW-OAC-CL-I

—169.14 —151.00 —136.10 —128.87 —121.98 —50.07 —35.01 —21.18

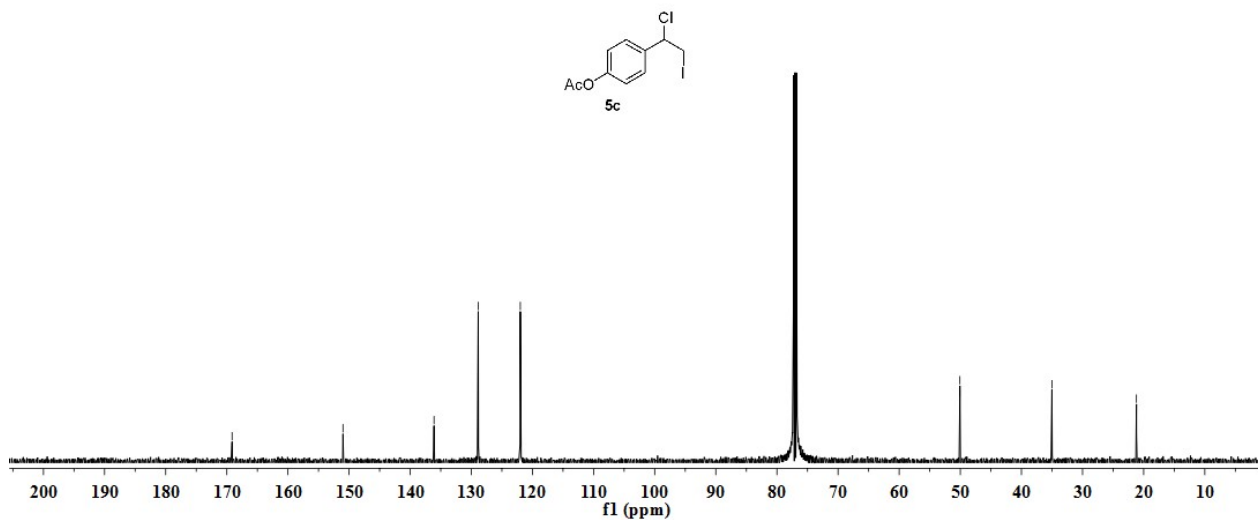

LSW-4PH-CL-I

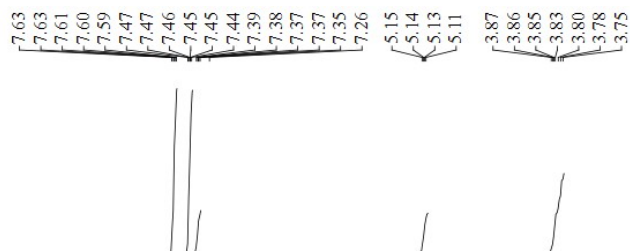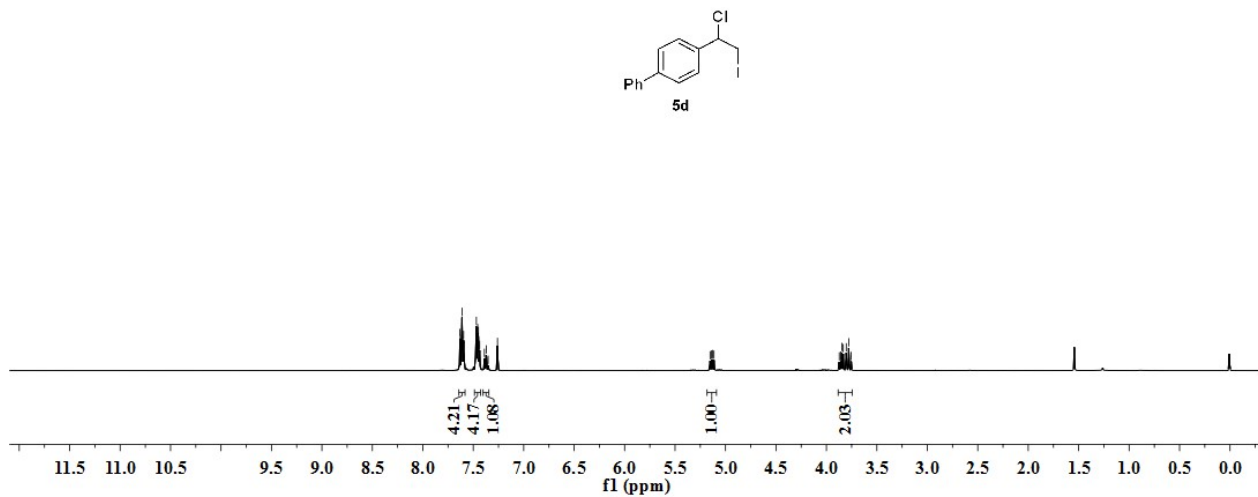



LSW-4PHENE-CL-I

142.07  
140.27  
137.98  
128.85  
127.68  
127.65  
127.51  
127.16

61.48

9.79

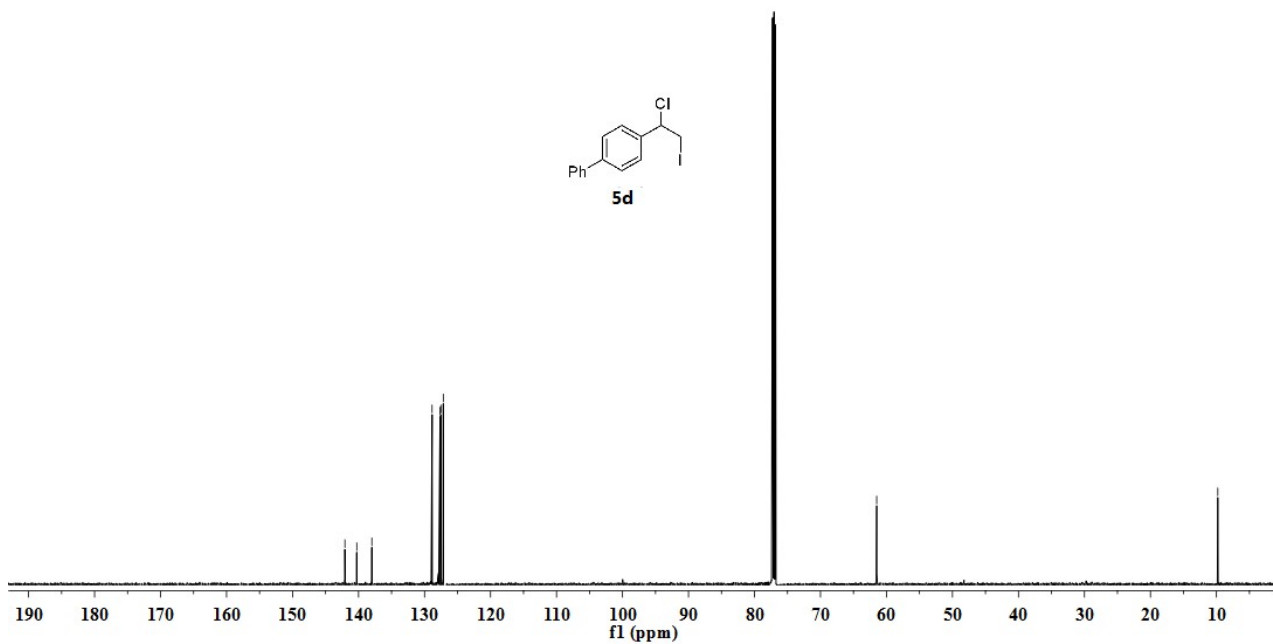

LSW-4ME-CL-I

7.28  
7.26  
7.21  
7.19

5.07  
5.06  
5.05  
5.04

3.83  
3.81  
3.80  
3.79  
3.75  
3.73  
3.70

2.37

1.55

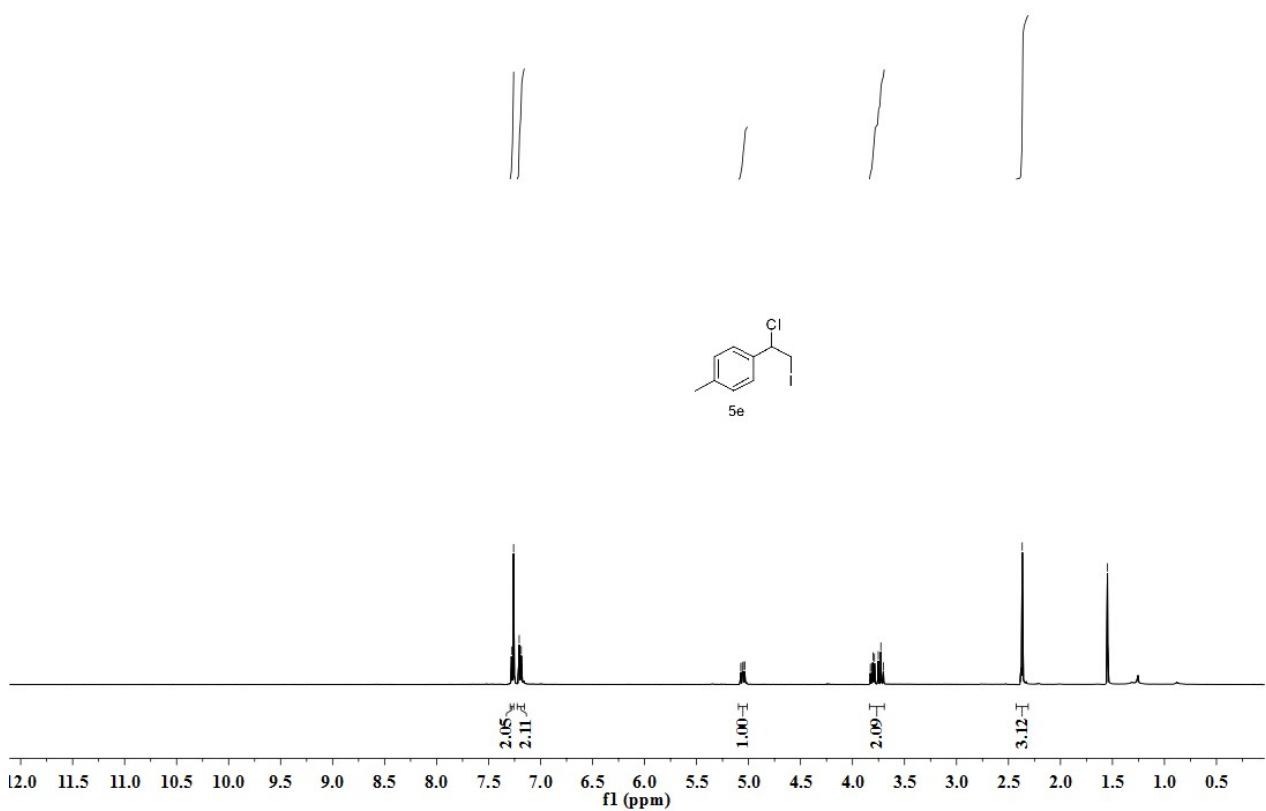

LSW-4ME--ENE-CL-I

139.18  
136.15  
129.50  
127.08

61.65

21.28

10.07

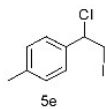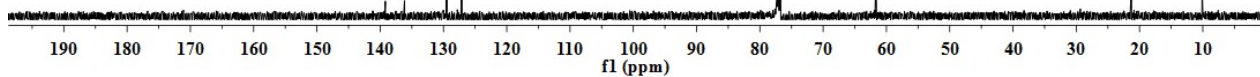

LSW-CF3

7.70  
7.69  
7.55  
7.54

5.14  
5.14  
5.13  
5.12

3.86  
3.85  
3.84  
3.83  
3.74  
3.73  
3.71

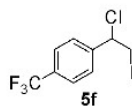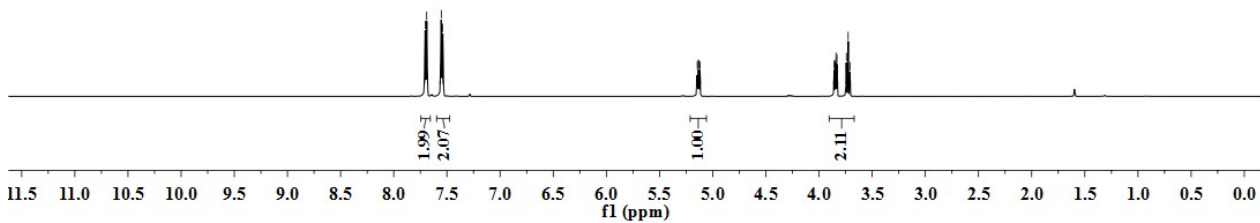

LSW-CF3

-62.64

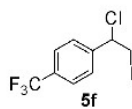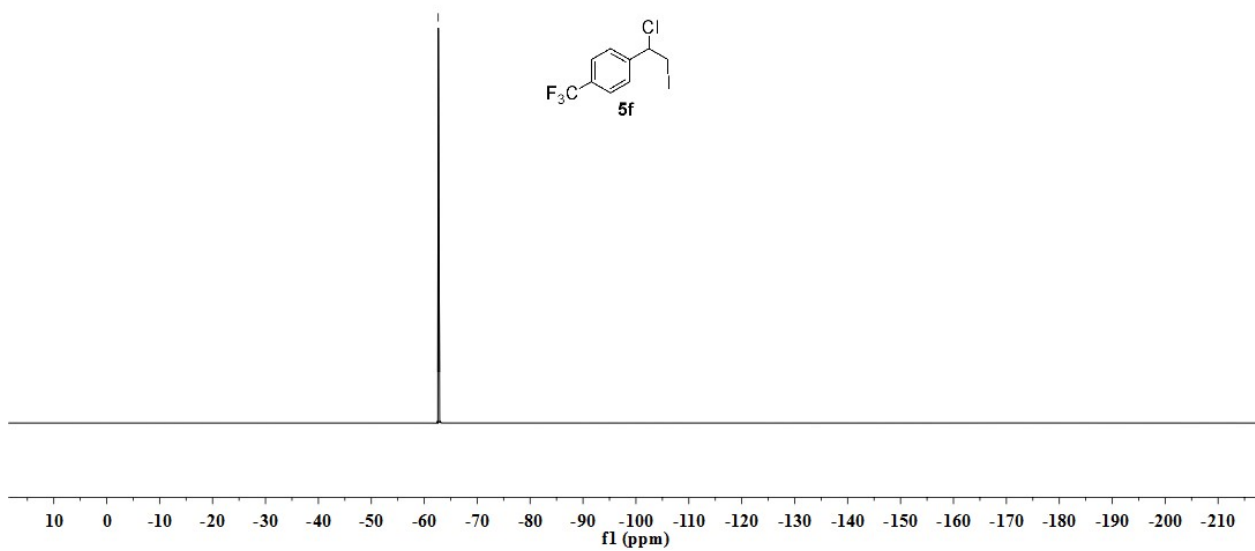

LSW-CF3

142.93  
142.92  
131.54  
131.33  
131.11  
130.90  
127.79  
126.53  
125.89  
125.87  
125.84  
125.82  
124.72  
122.92  
121.11

-60.33

-9.07

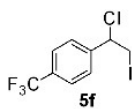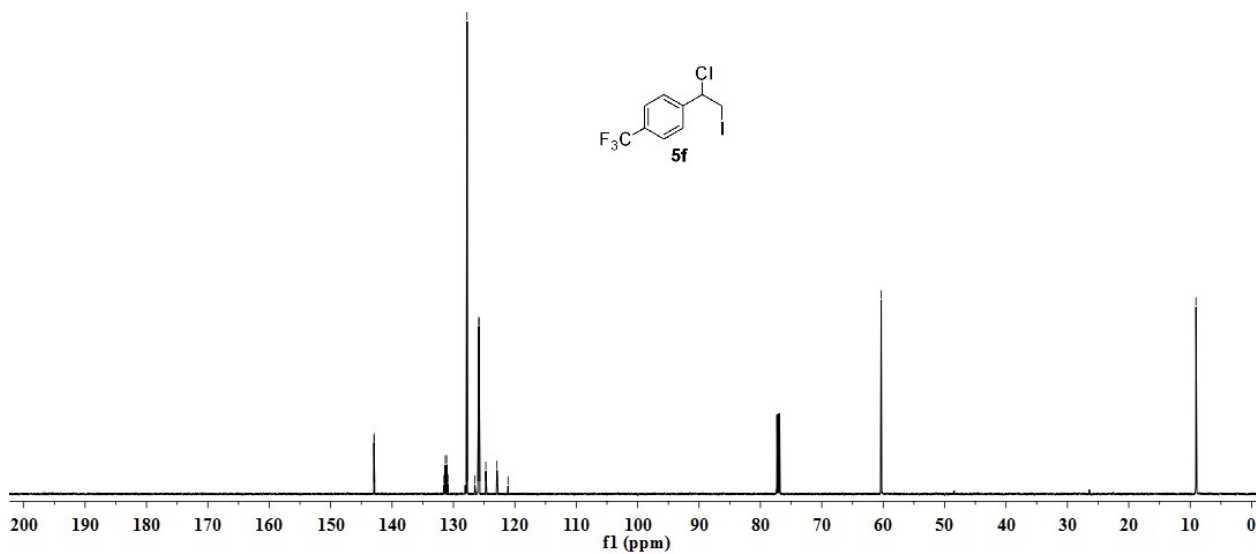

LSW-4N02-1

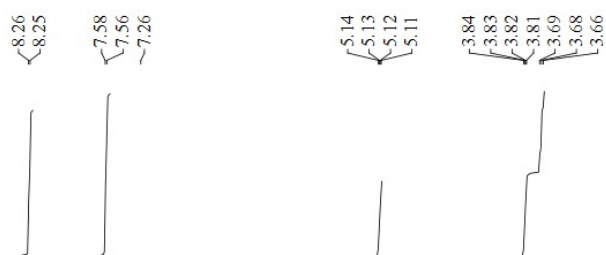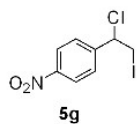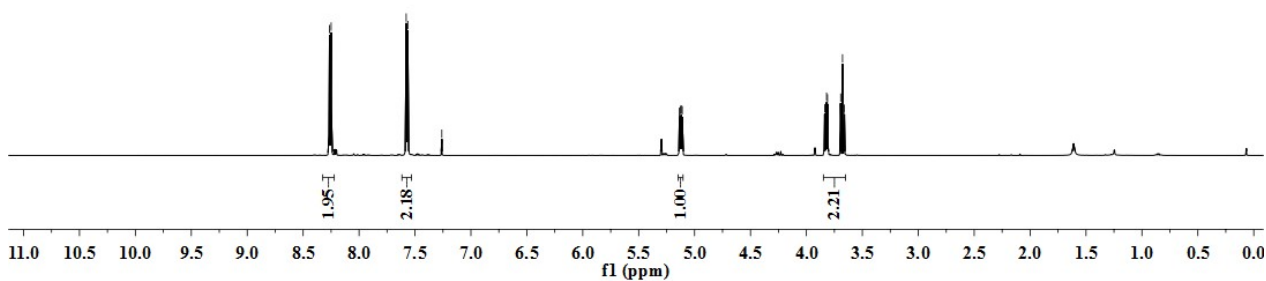

LSW-4N02-1

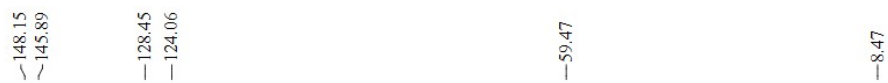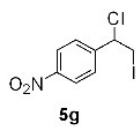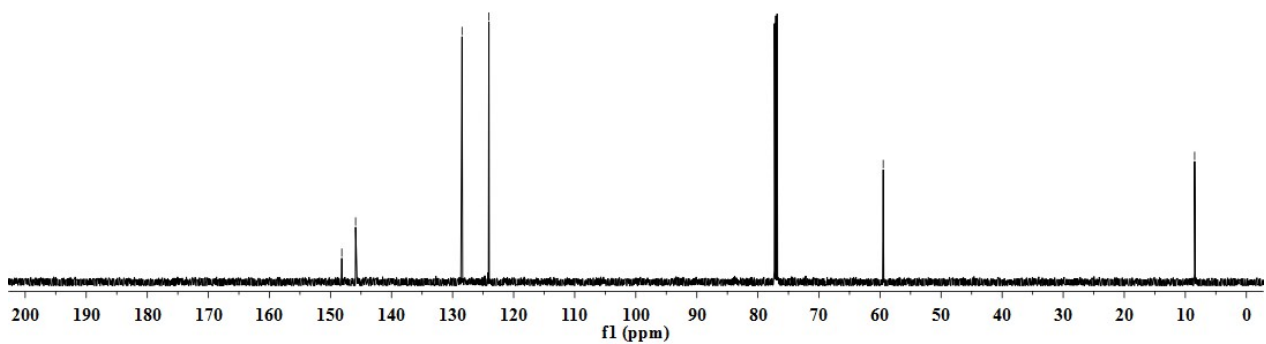

LSW-4N02

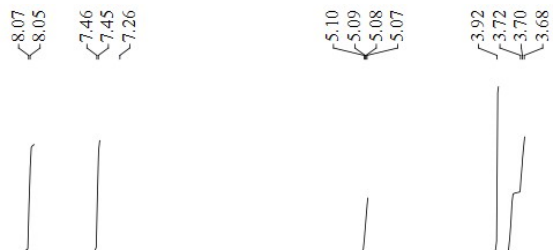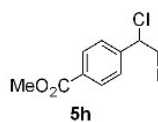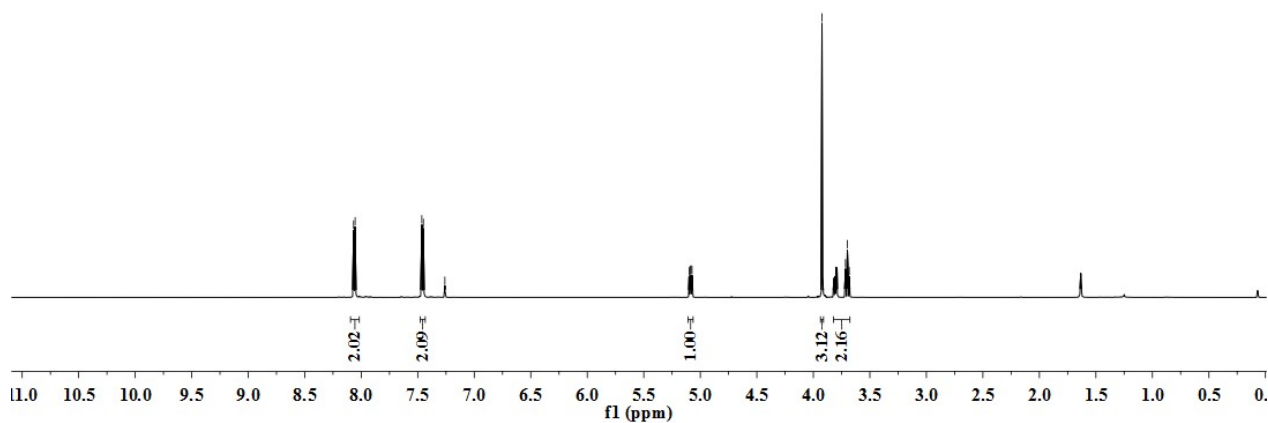

LSW-4C00ME

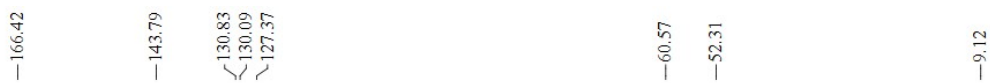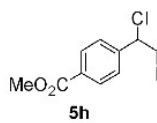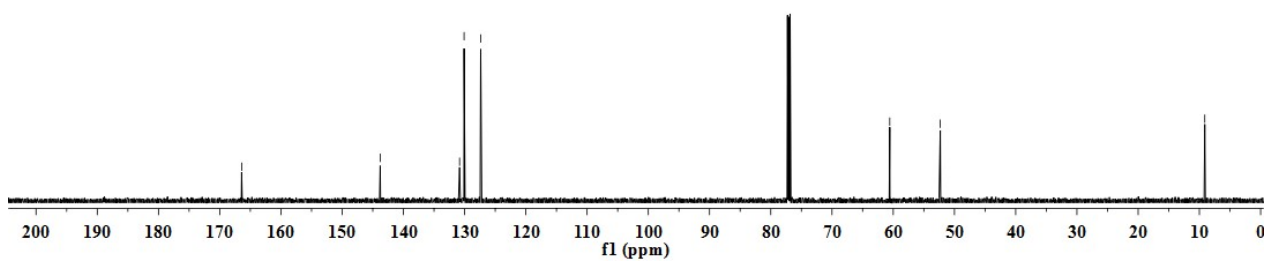

LSW-2BR-ENE-CL-I

7.59  
7.59  
7.57  
7.57  
7.55  
7.55  
7.53  
7.53  
7.41  
7.40  
7.39  
7.39  
7.37  
7.37  
7.25  
7.23  
7.22  
7.21  
7.21  
7.19  
7.19  
5.62  
5.60  
5.58  
3.80  
3.78  
3.78  
3.76  
3.76  
3.75  
3.74  
3.72

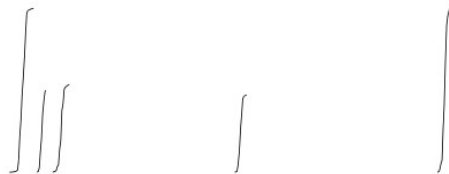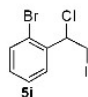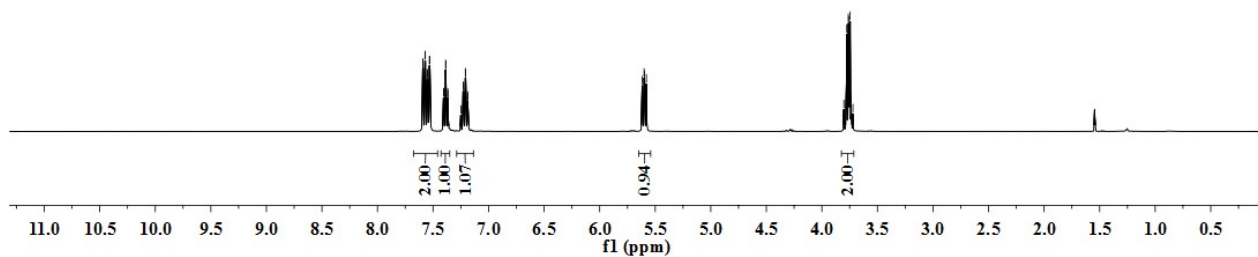

LSW-2BR-ENE-CL-I

138.27  
133.14  
130.45  
128.22  
128.16  
123.84

59.49

8.53

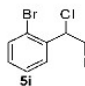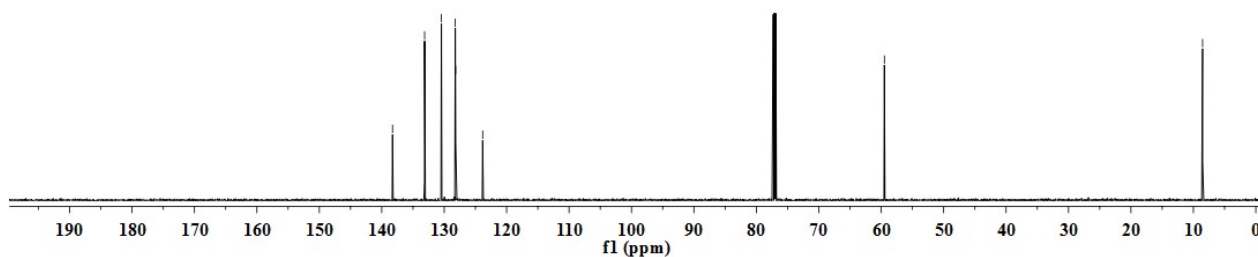

LSW-3BR-ENE-CL-I

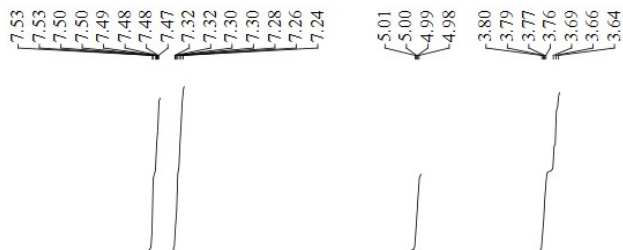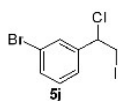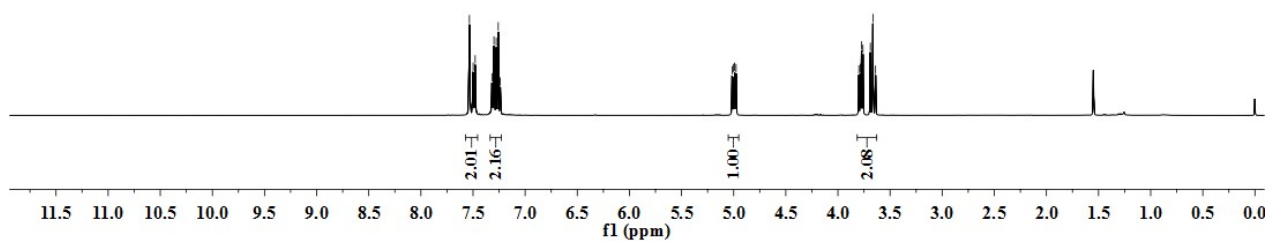

LSW-3-BR-ENE-CL-I

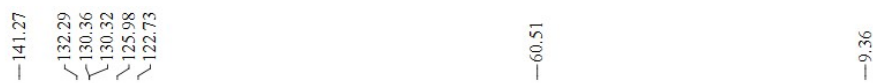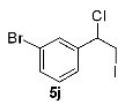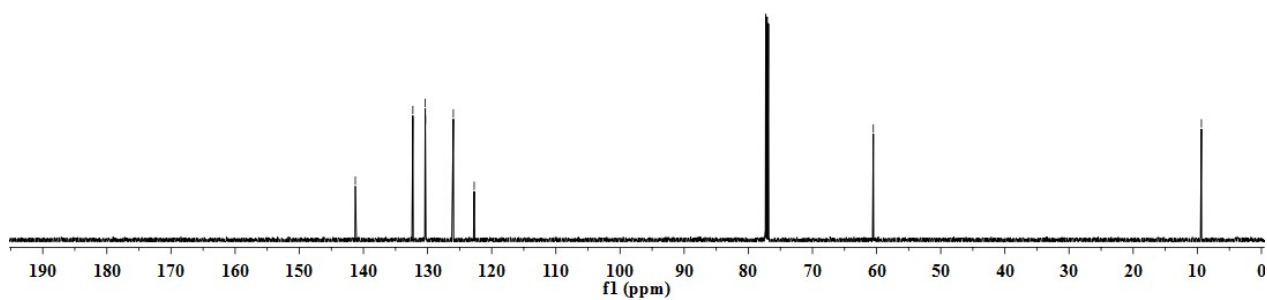

LSW-NAI

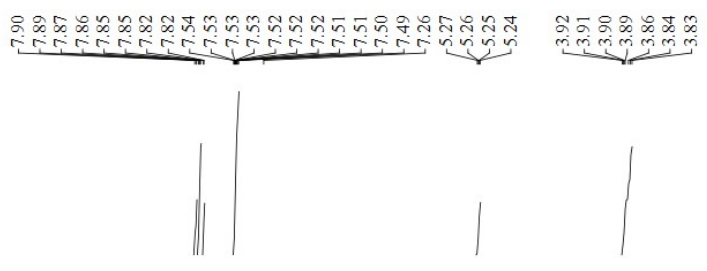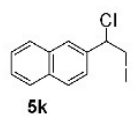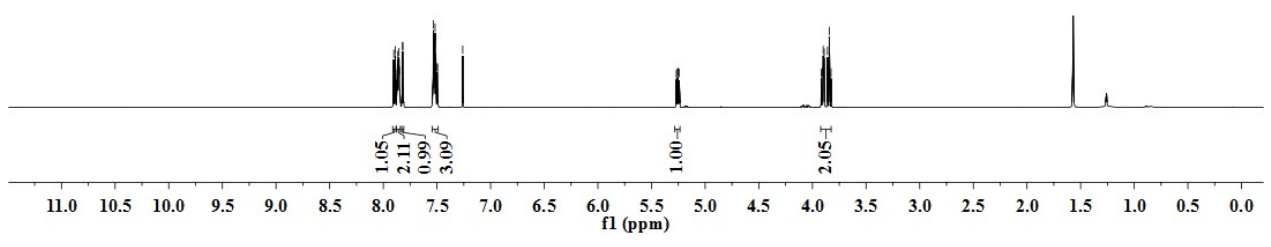

LSW-NAI

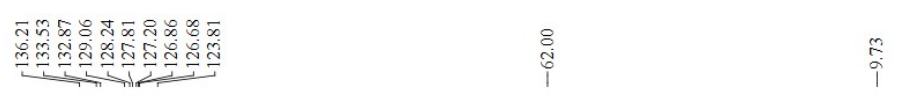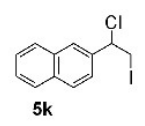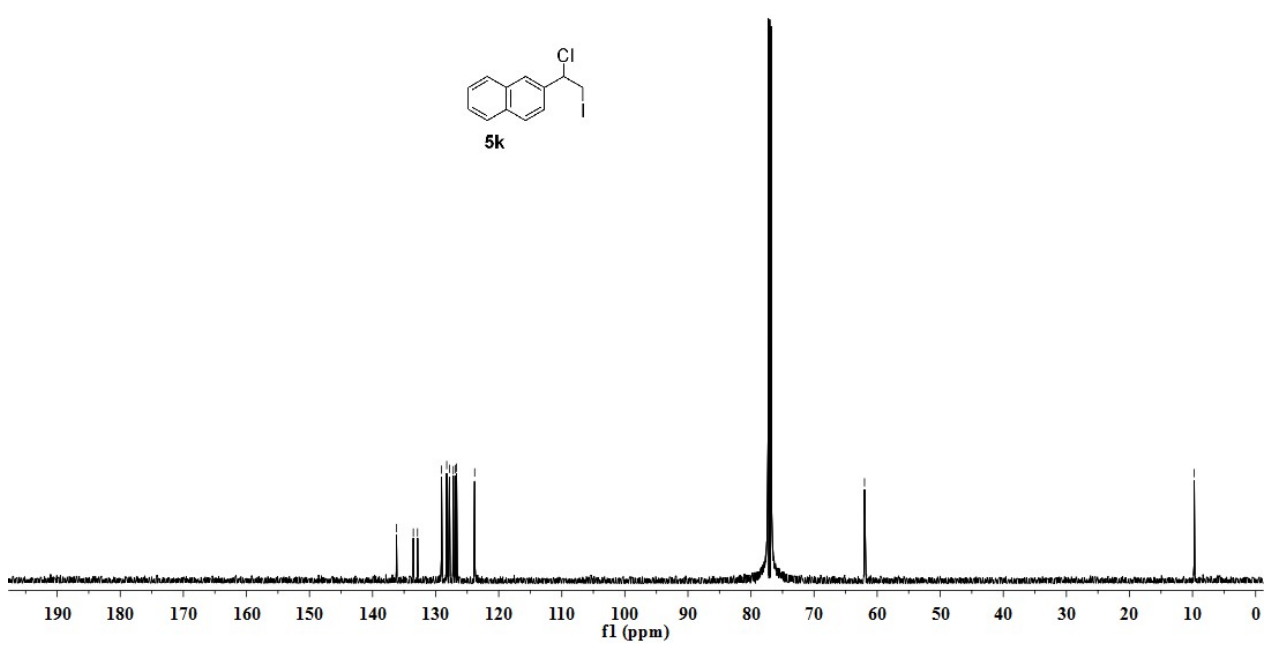



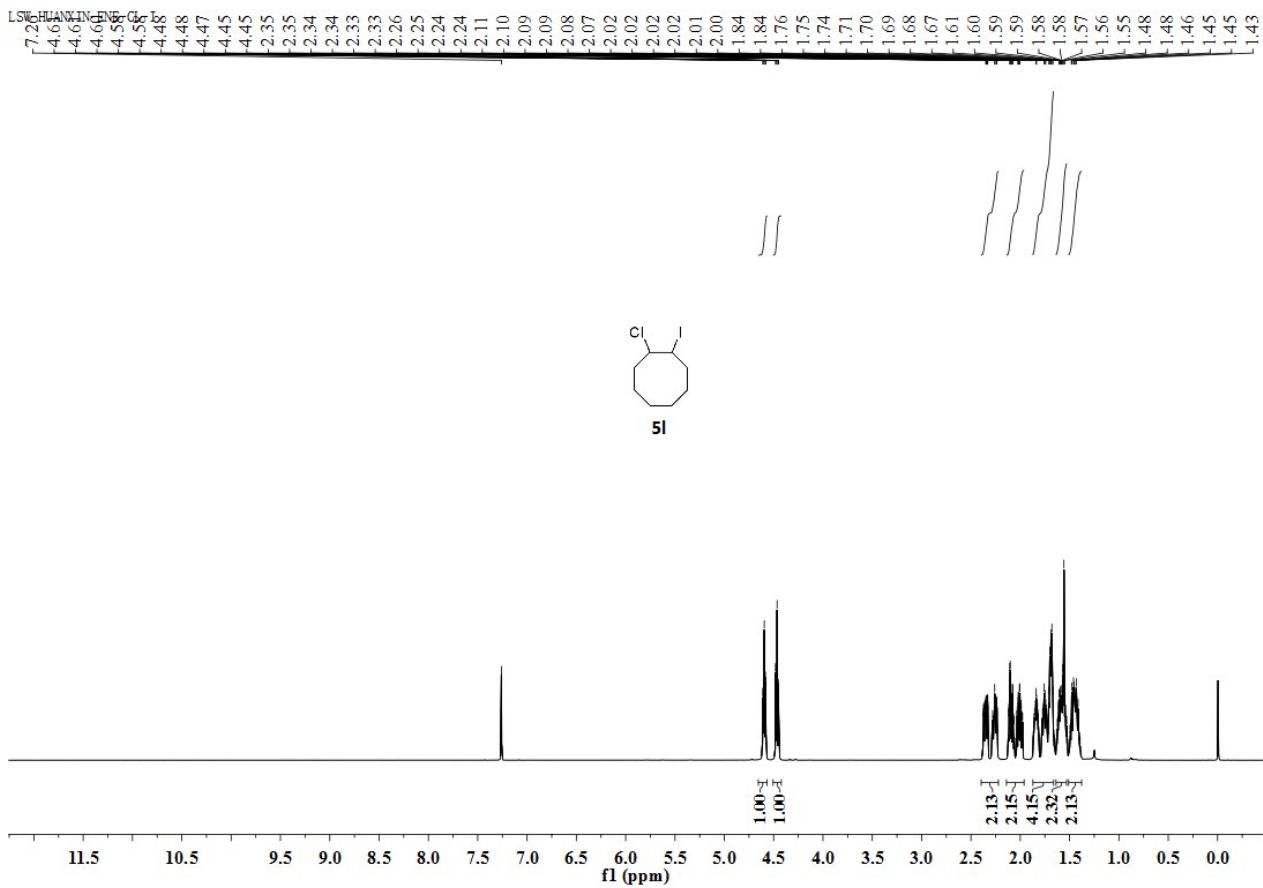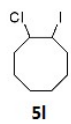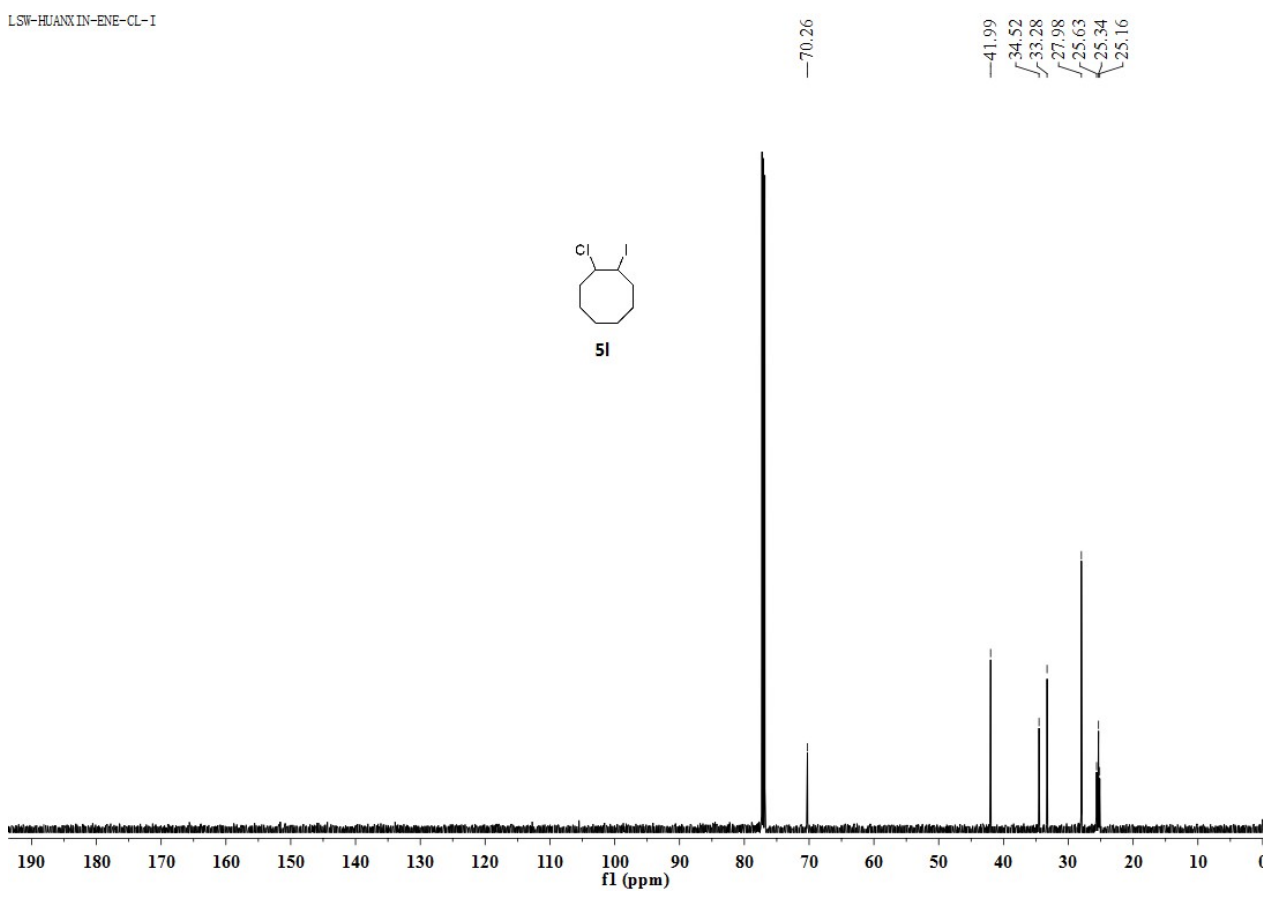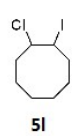

LSW-ENE-12232

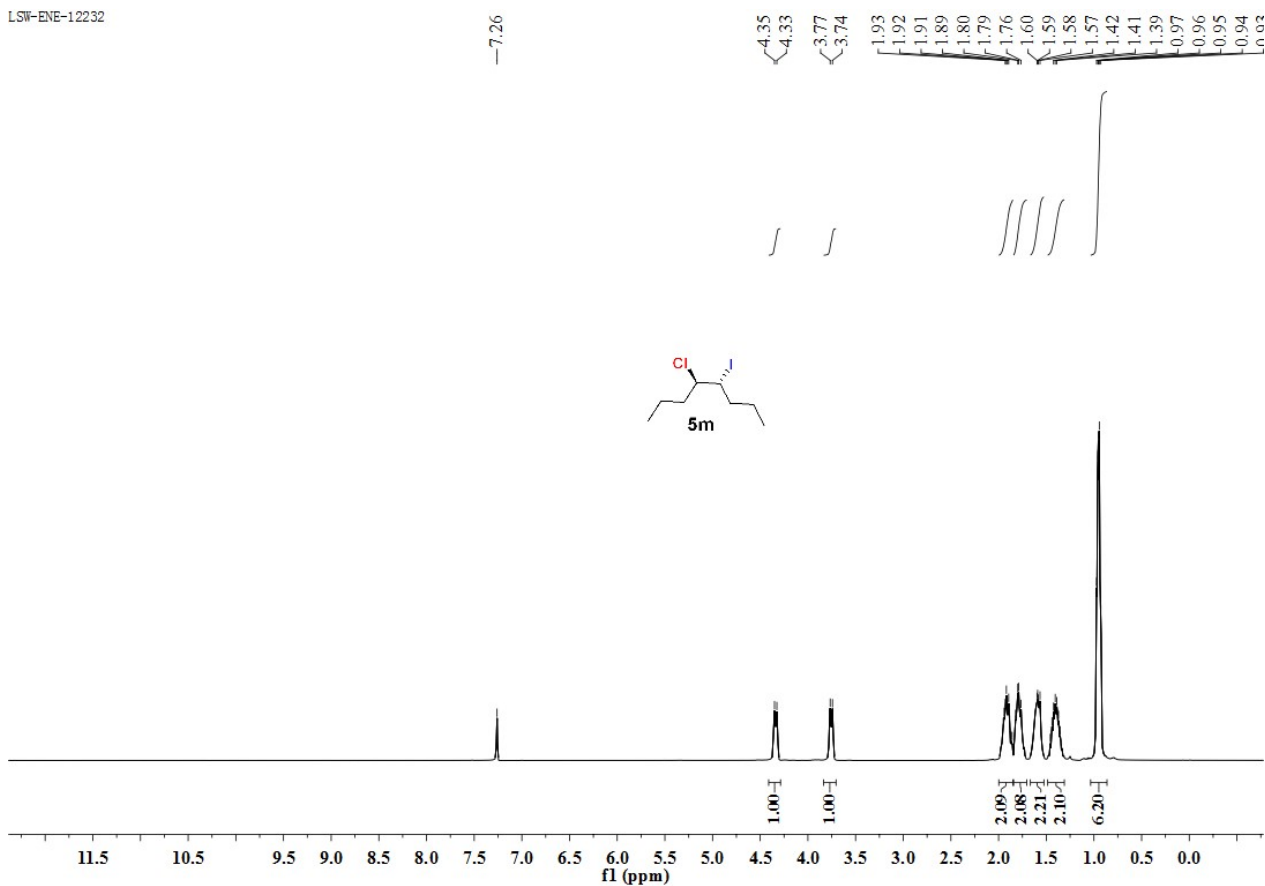

LSW-ENE-12232

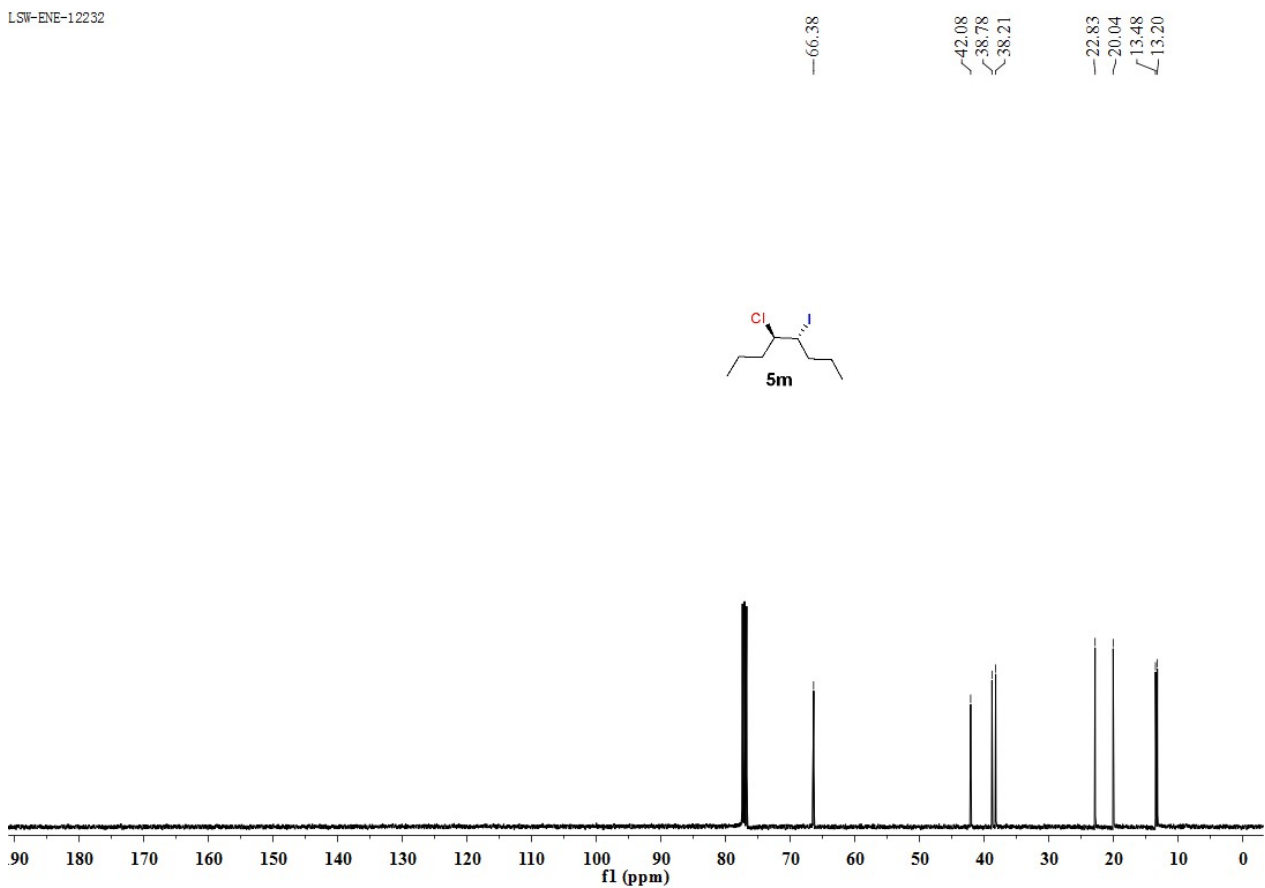

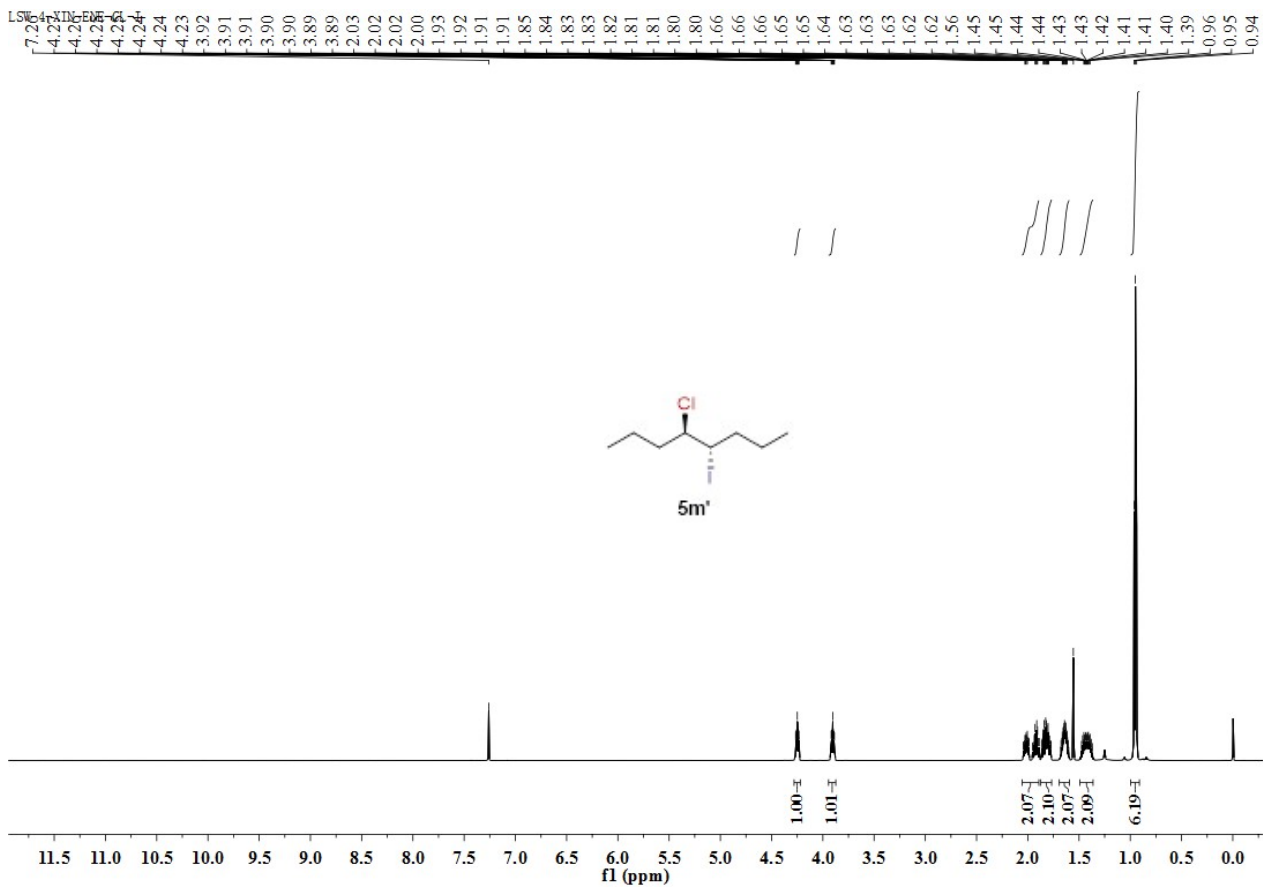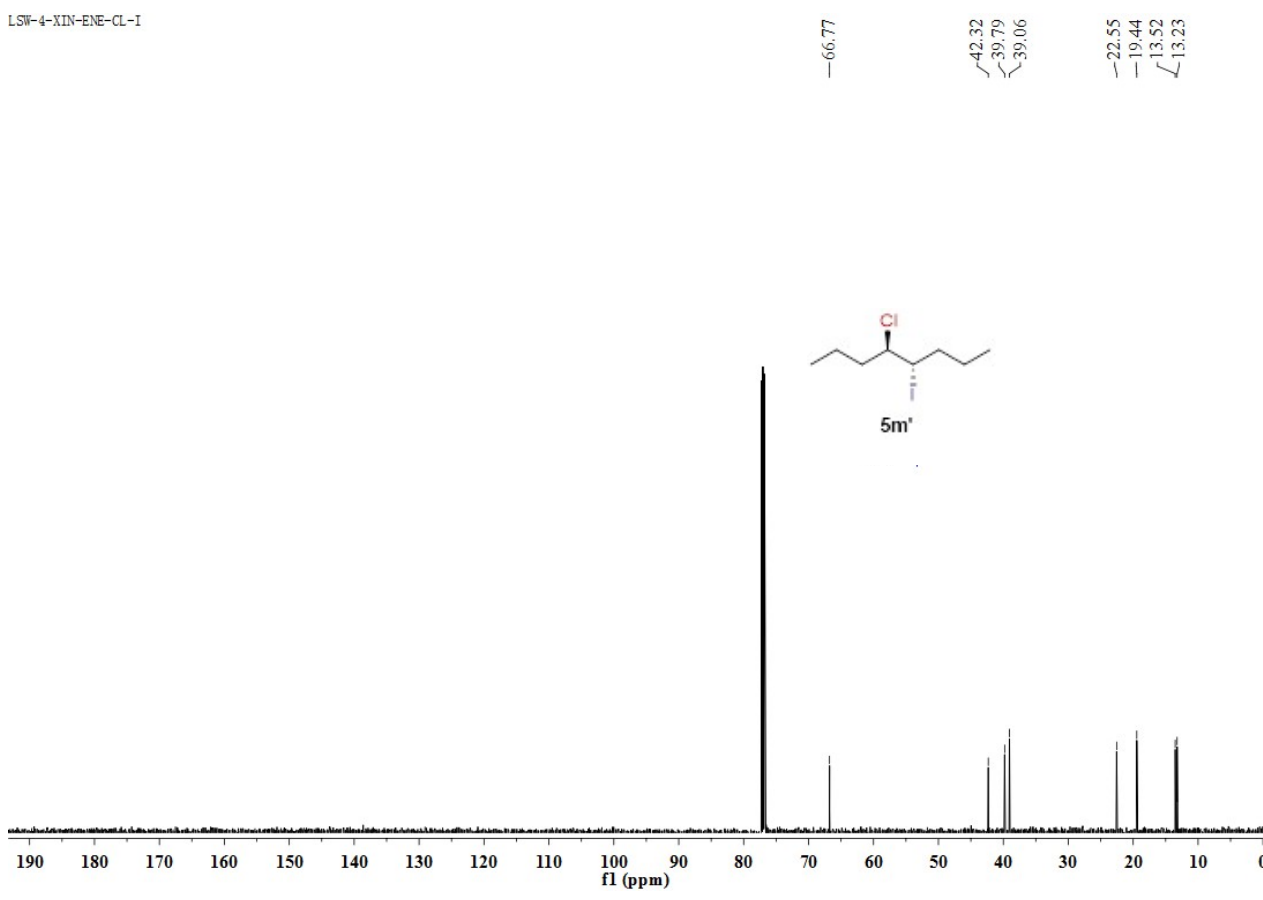

LSW-NCH2QUE-CL-I

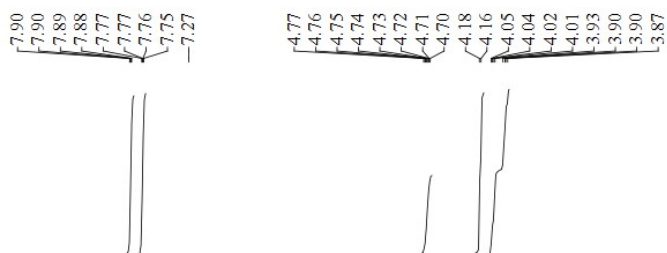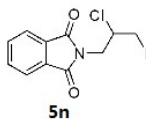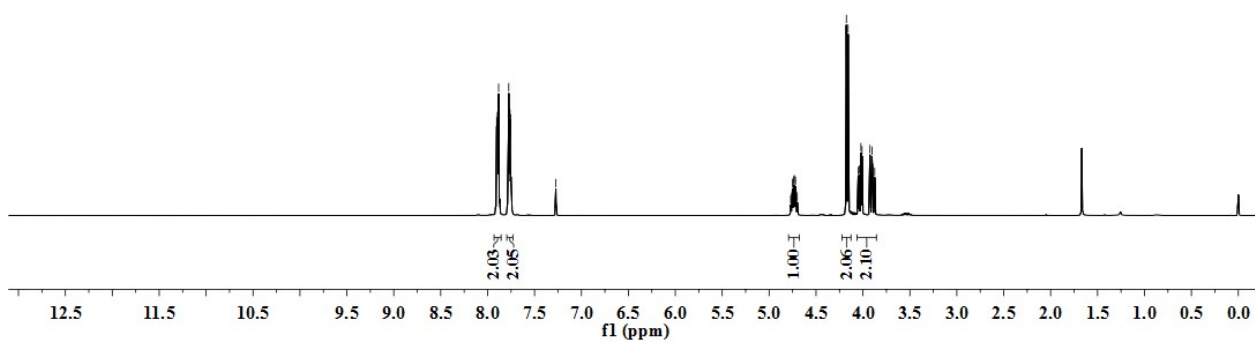

LSW-NCH2-ENE-CL-I

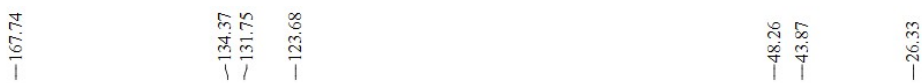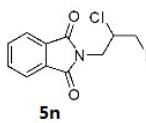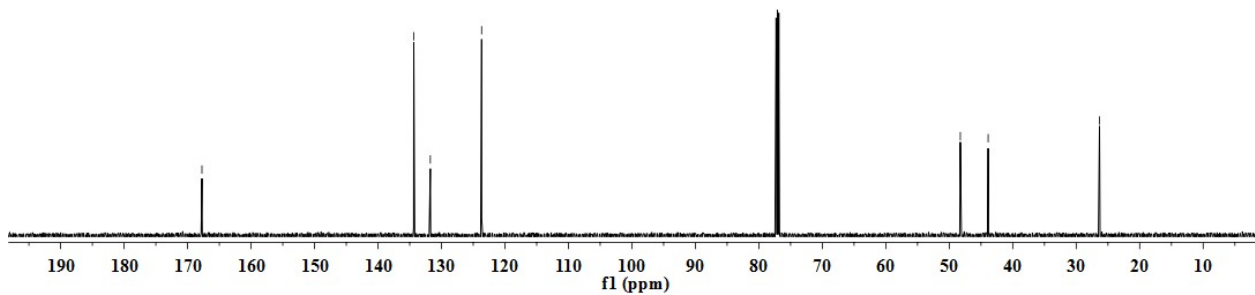

LSW-2CHO-1-CH2-ENE-CL-I

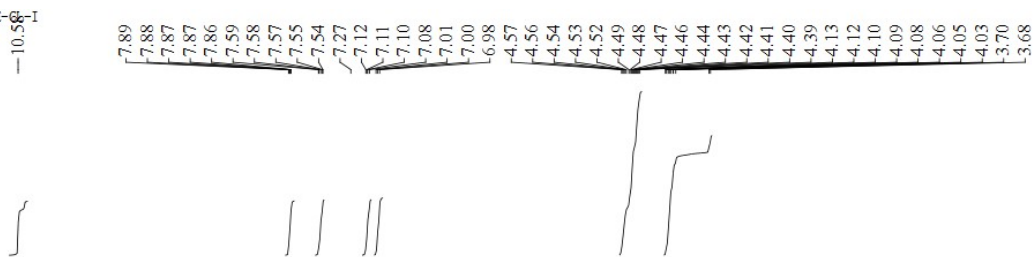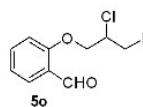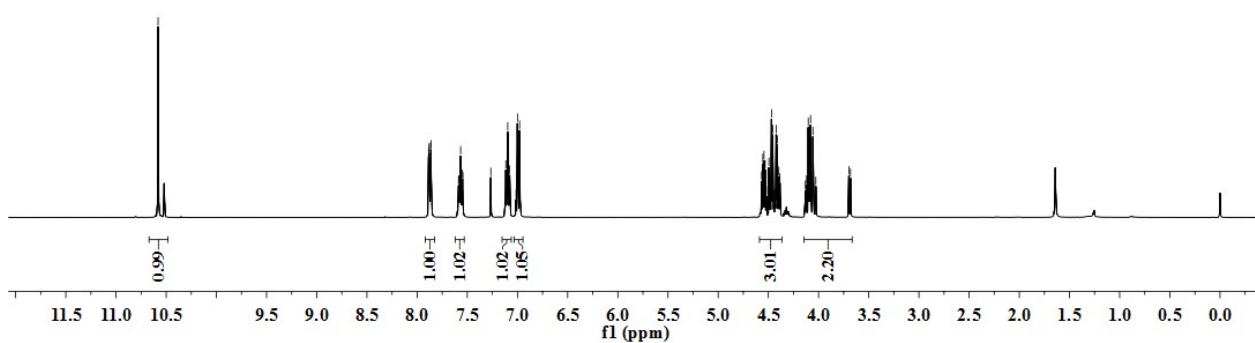

LSW-1, 3-DIO-2-ONE-4-ENE-CL-I

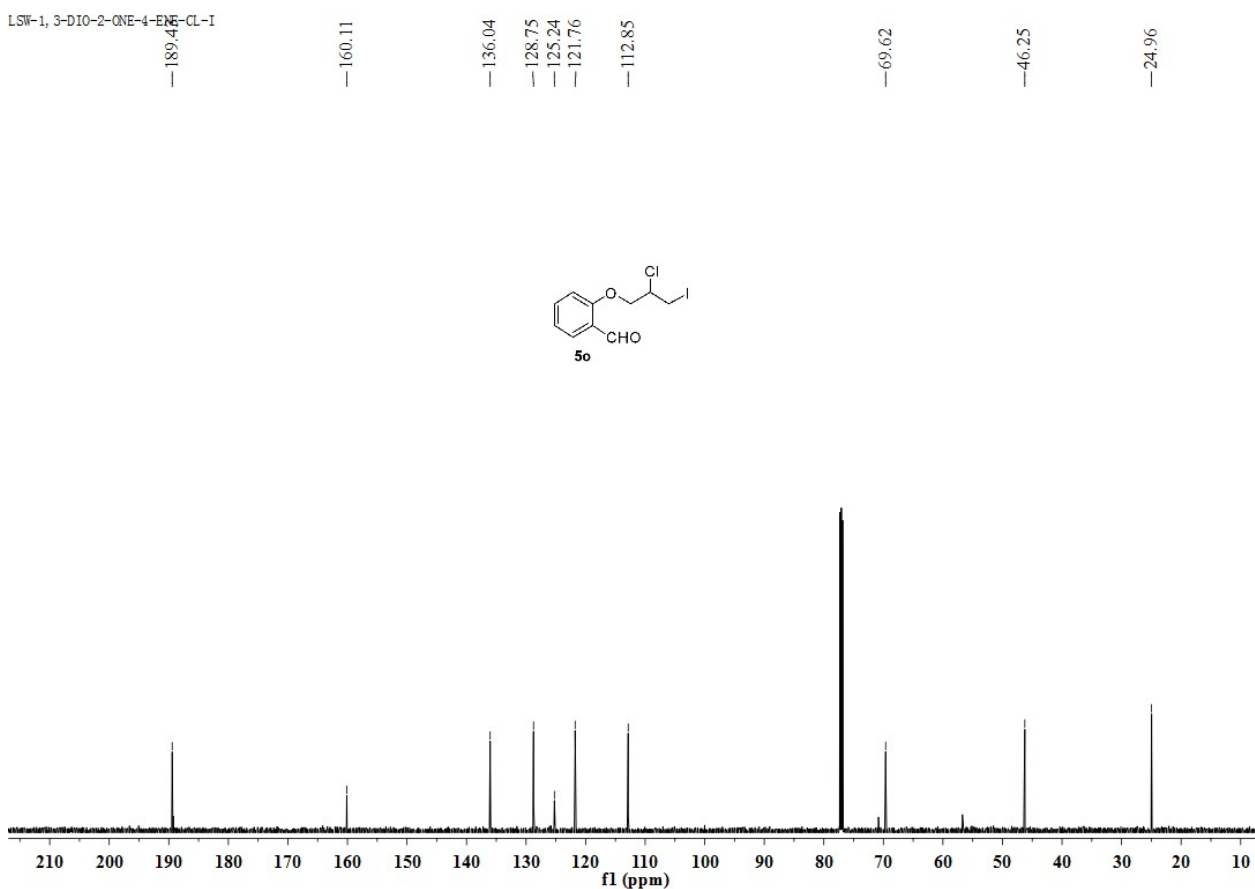

LSW-1, 3-DIO-5-ENE-CL-I

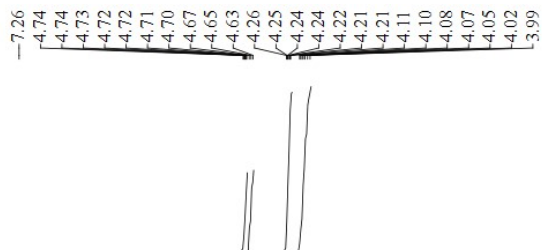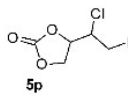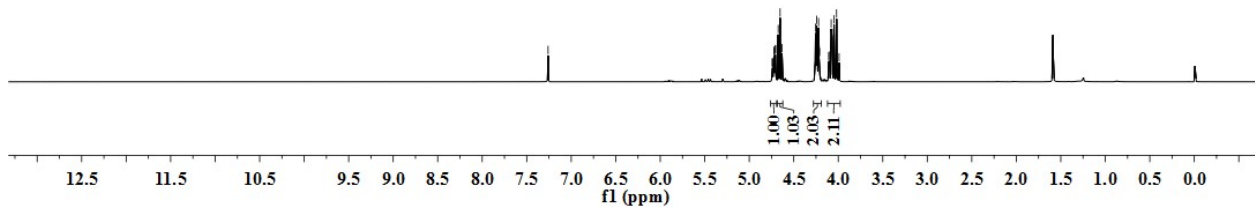

LSW-1, 3-DIO-2-ONE-4-ENE-CL-I

153.71

72.90

69.54

45.38

31.80

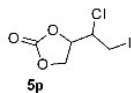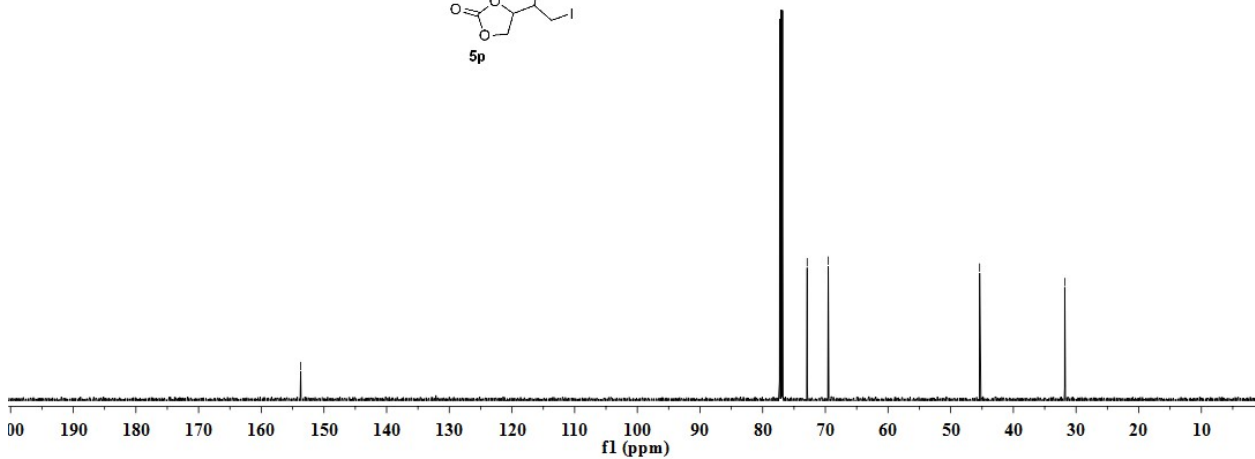

LSW-10-2-ESTER-3-ENE-CL-I

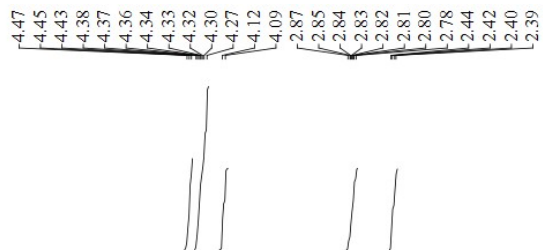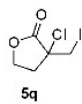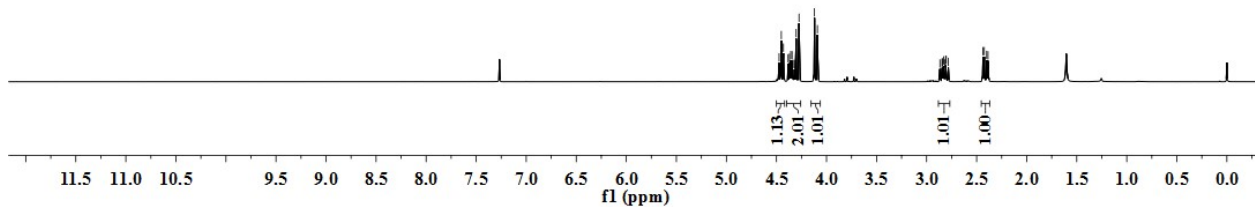

LSW-10-2-ONE-3-ENE-CL-I

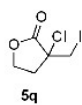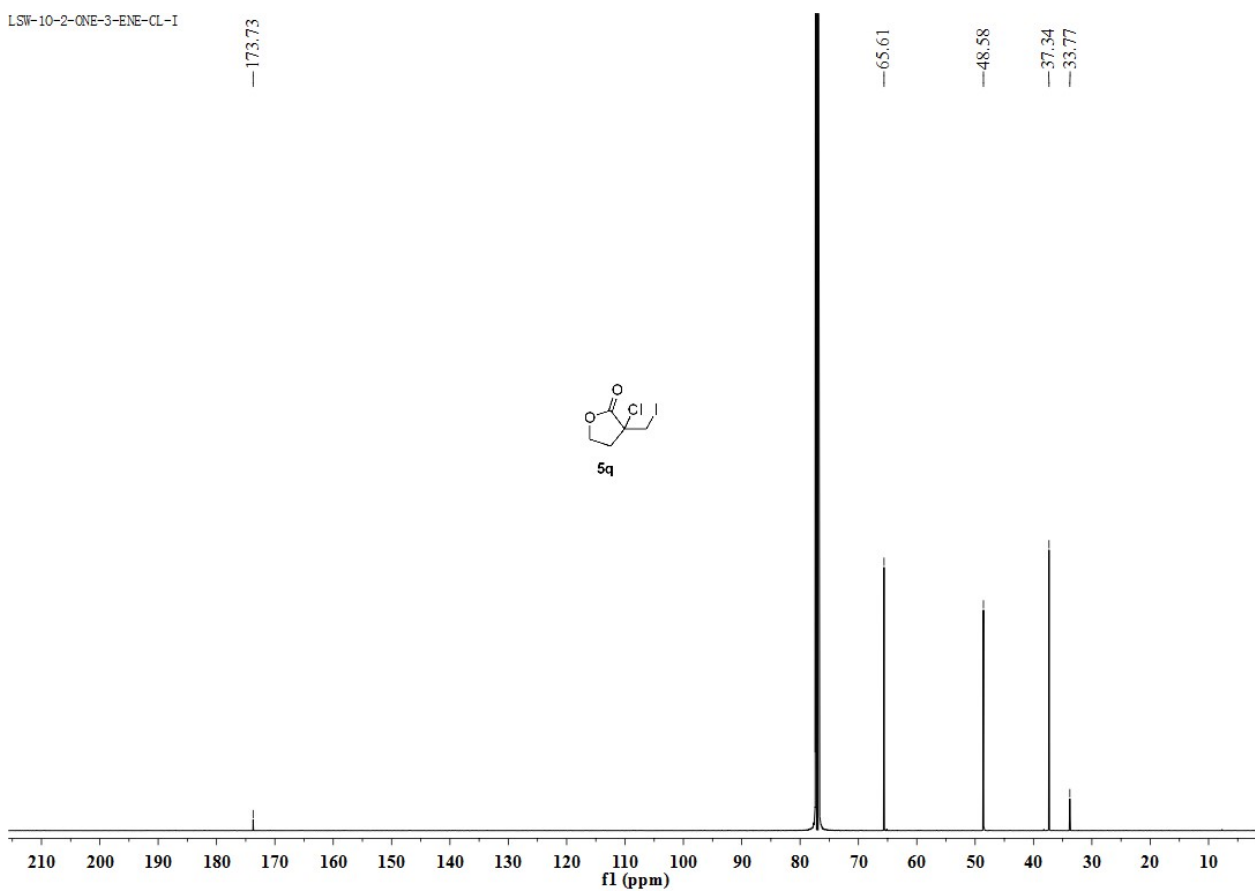

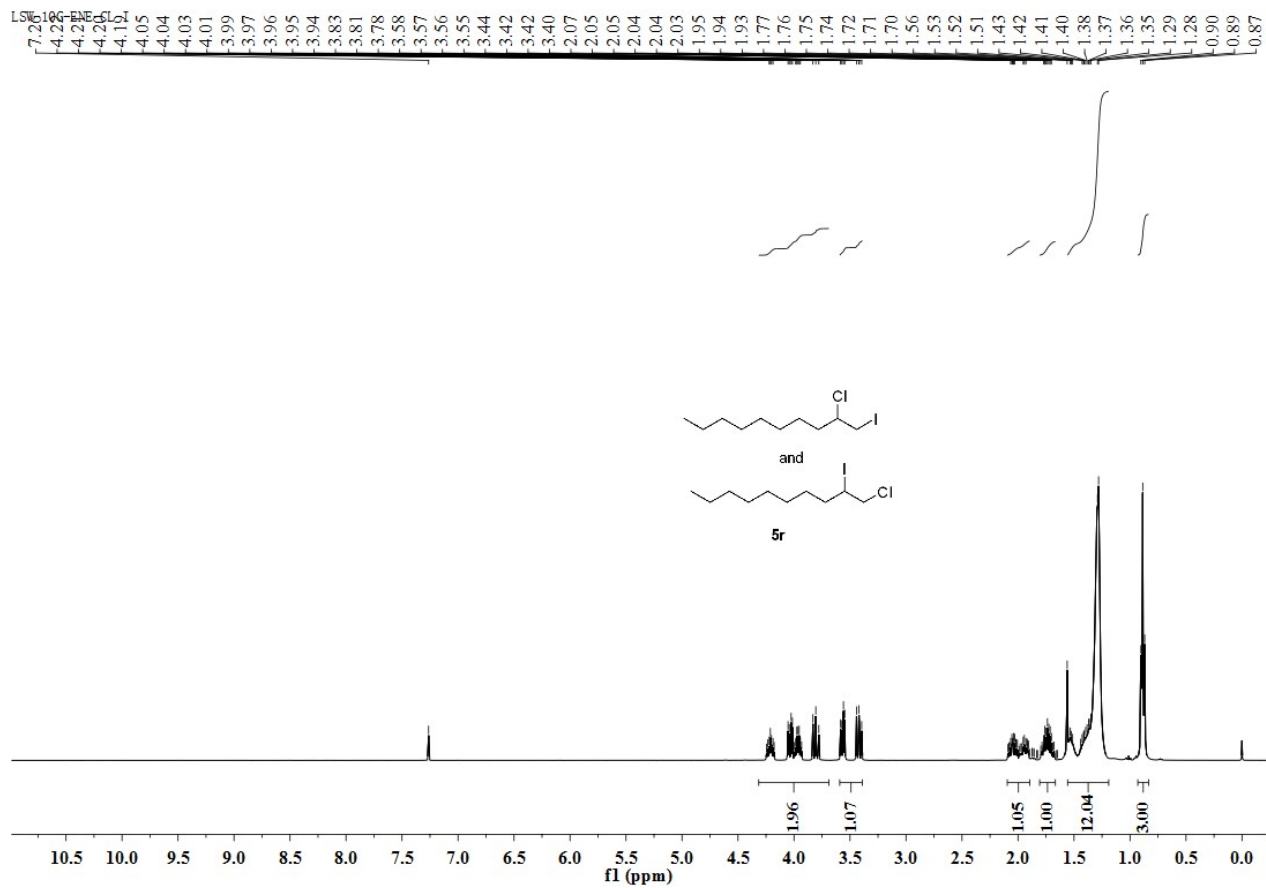

LSW-10C-ENE-CL-I

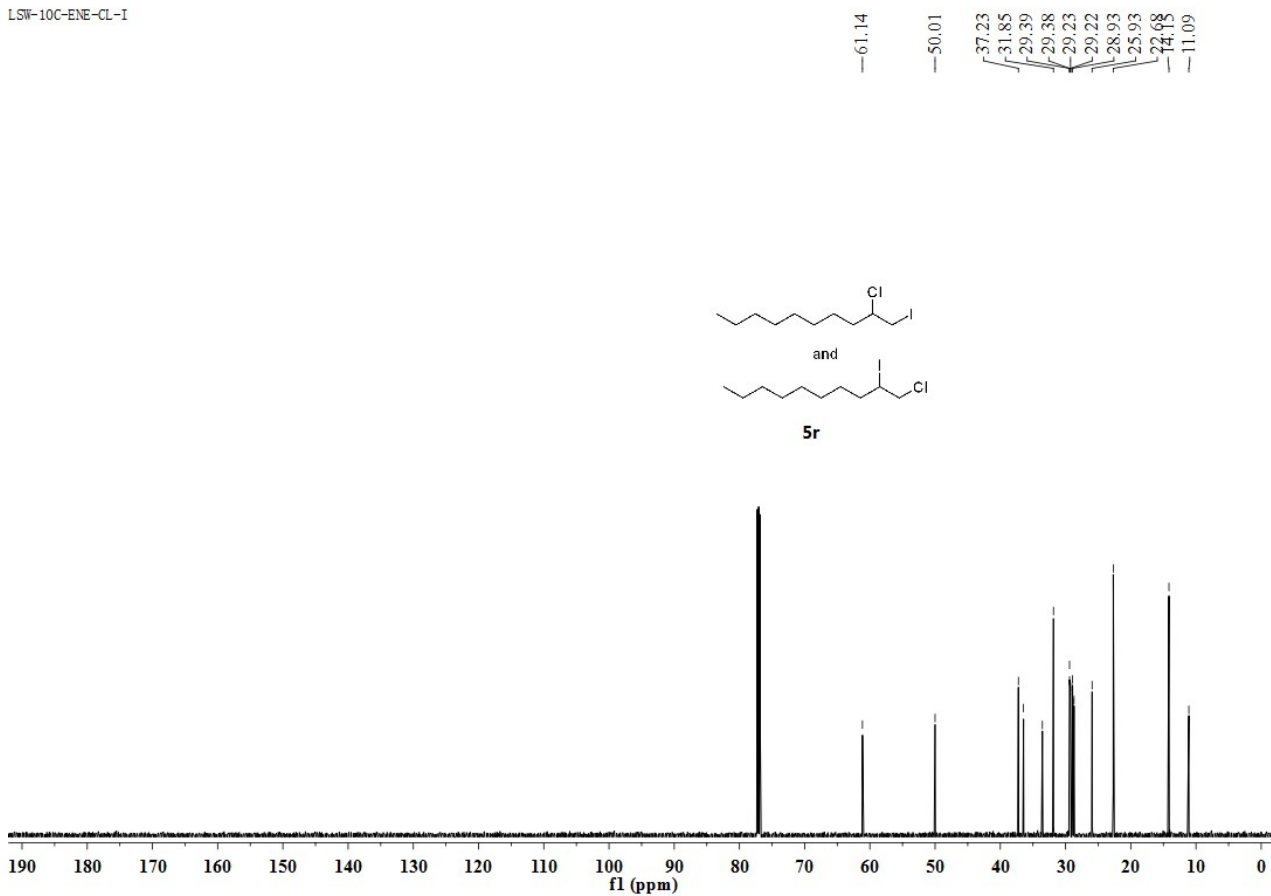



LSW-OAC-BR-I

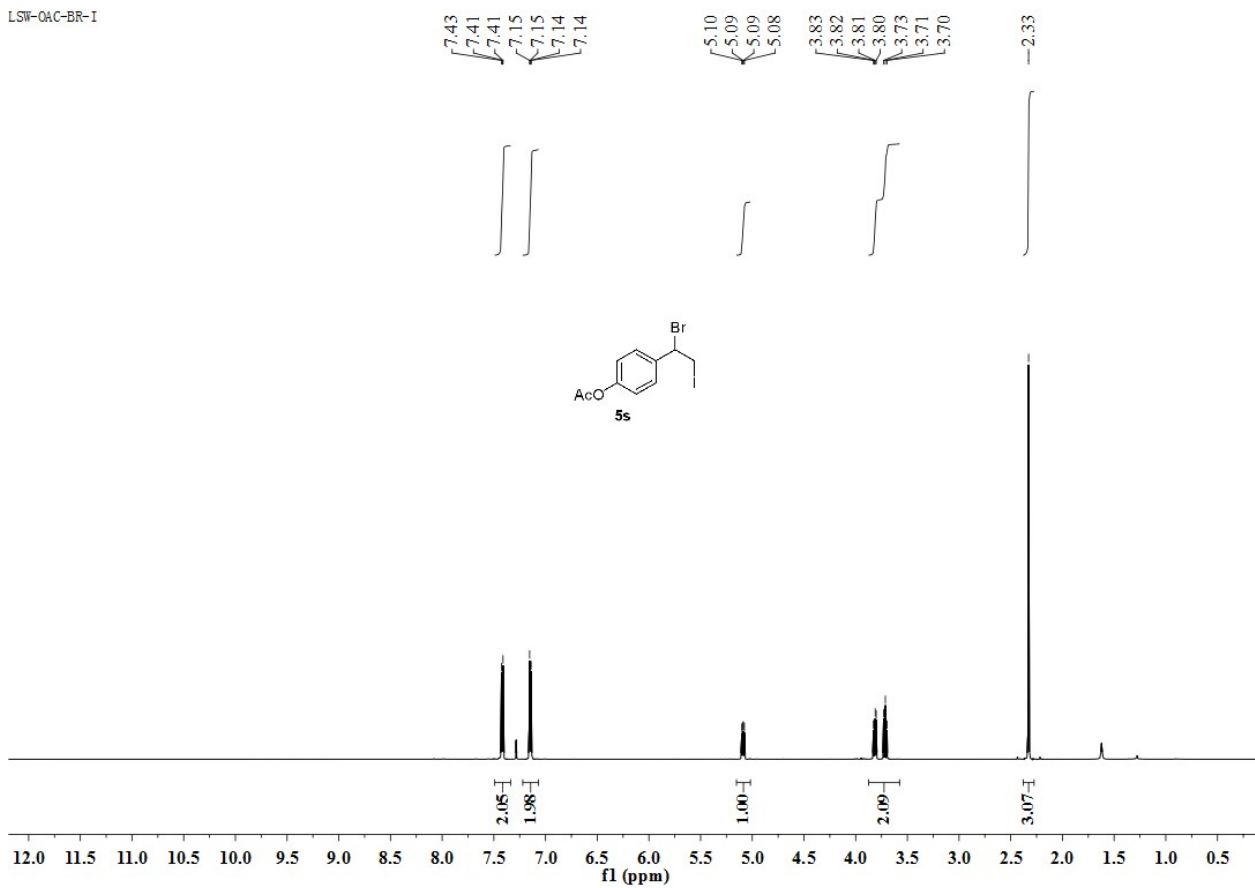

LSW-OAC-BR-I

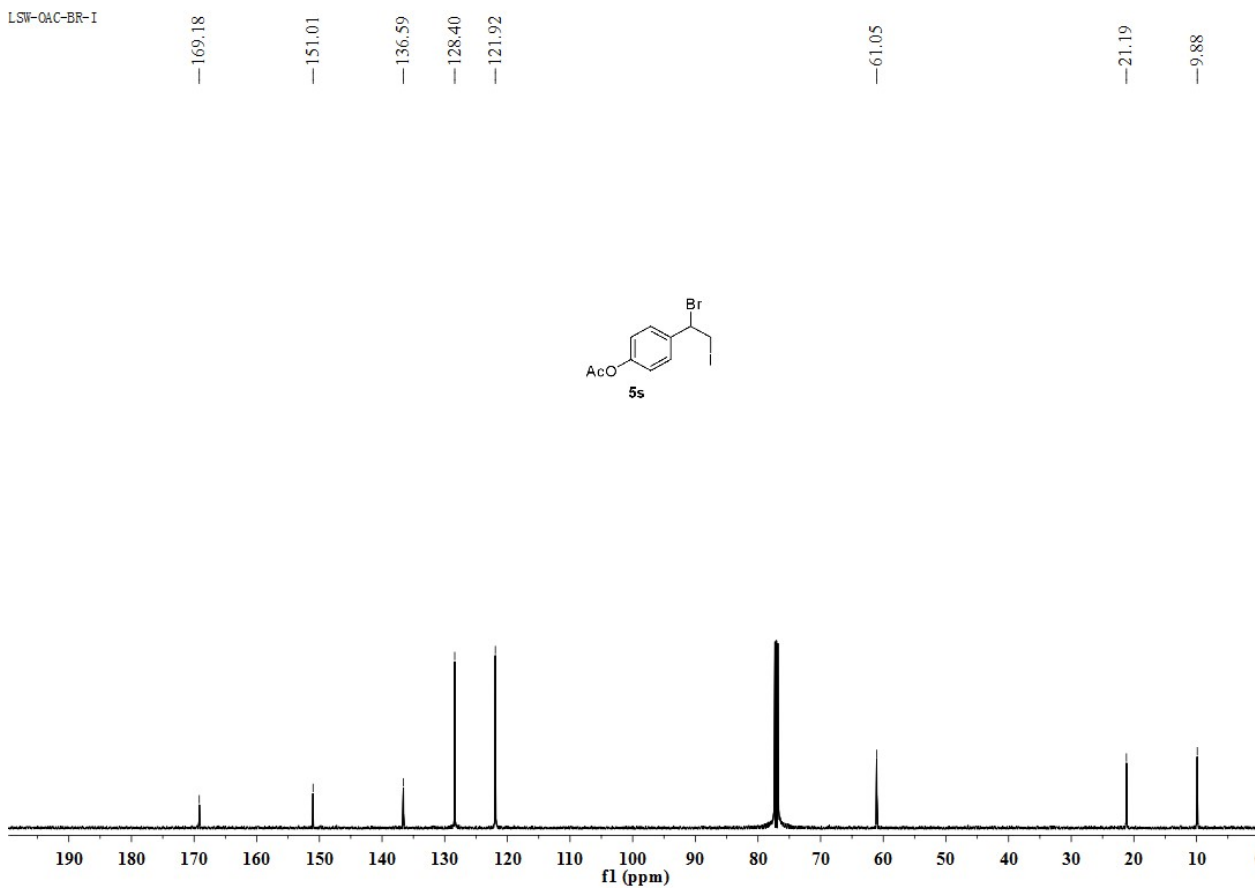

## 7. X-ray crystallographic data of 3q

To a glass vial (2 mL) was added **3q** (CCDC 1912785) (0.2 g) and charged with DCM/hexane (1 mL : 0.5 mL) and then sealed with a septum. The crystal of 3q grew slowly with the volatilization of solvents within 1 week.

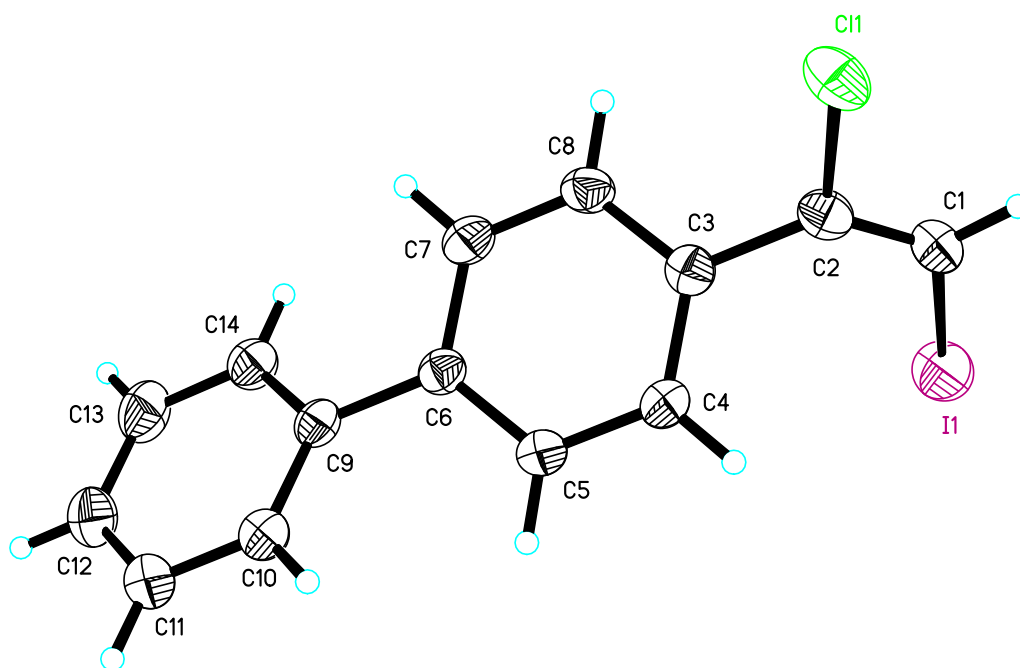

Figure S2. ORTEP drawing of 3q at the 50% probability level.

Table S2. Crystal data and structure refinement for mo\_dd18319\_0m.

---

|                      |                                         |
|----------------------|-----------------------------------------|
| Identification code  | mo_dd18319_0m                           |
| Empirical formula    | C <sub>14</sub> H <sub>10</sub> ClI     |
| Formula weight       | 340.57                                  |
| Temperature          | 293(2) K                                |
| Wavelength           | 0.71073 Å                               |
| Crystal system       | Monoclinic                              |
| Space group          | P 2 <sub>1</sub> /c                     |
| Unit cell dimensions | a = 9.7863(4) Å $\angle$ = 90°.         |
|                      | b = 9.7114(3) Å $\angle$ = 100.442(2)°. |
|                      | c = 13.7154(5) Å $\angle$ = 90°.        |

Volume 1281.91(8) Å<sup>3</sup>

Z 4

Density (calculated) 1.765 Mg/m<sup>3</sup>

Absorption coefficient 2.676 mm<sup>-1</sup>

F(000) 656

Crystal size 0.170 x 0.150 x 0.110 mm<sup>3</sup>

Theta range for data collection 2.116 to 25.988°.

Index ranges -10 ≤ h ≤ 12, -11 ≤ k ≤ 10, -16 ≤ l ≤ 14

Reflections collected 6080

Independent reflections 2478 [R(int) = 0.0201]

Completeness to theta = 25.242° 98.7 %

Absorption correction Semi-empirical from equivalents

Max. and min. transmission 0.7456 and 0.5529

Refinement method Full-matrix least-squares on F<sup>2</sup>

Data / restraints / parameters 2478 / 0 / 146

Goodness-of-fit on F<sup>2</sup> 1.050

Final R indices [I > 2σ(I)] R<sub>1</sub> = 0.0397, wR<sub>2</sub> = 0.0956

R indices (all data) R<sub>1</sub> = 0.0474, wR<sub>2</sub> = 0.1017

Extinction coefficient 0.0055(15)

Largest diff. peak and hole 1.069 and -0.788 e.Å<sup>-3</sup>

---

**Table S3. Atomic coordinates (x 10<sup>4</sup>) and equivalent isotropic displacement parameters (Å<sup>2</sup>x 10<sup>3</sup>) for mo\_dd18319\_0m. U(eq) is defined as one third of the trace of the orthogonalized Uij tensor.**

|       | x       | y        | z       | U(eq) |
|-------|---------|----------|---------|-------|
| I(1)  | 7537(1) | 10197(1) | 3302(1) | 78(1) |
| Cl(1) | 8203(1) | 7305(1)  | 722(1)  | 63(1) |
| C(1)  | 7781(4) | 9237(5)  | 1995(3) | 55(1) |
| C(2)  | 7857(4) | 7890(4)  | 1879(3) | 47(1) |
| C(3)  | 7684(4) | 6774(4)  | 2581(3) | 43(1) |
| C(4)  | 6471(4) | 6649(4)  | 2952(3) | 51(1) |
| C(5)  | 6295(4) | 5596(4)  | 3591(3) | 49(1) |
| C(6)  | 7339(4) | 4628(4)  | 3894(3) | 41(1) |
| C(7)  | 8554(4) | 4758(4)  | 3504(3) | 48(1) |
| C(8)  | 8719(4) | 5803(4)  | 2862(3) | 48(1) |
| C(9)  | 7159(4) | 3508(4)  | 4593(3) | 42(1) |
| C(10) | 5864(4) | 2960(4)  | 4629(3) | 52(1) |
| C(11) | 5697(5) | 1921(5)  | 5286(4) | 63(1) |
| C(12) | 6827(5) | 1410(5)  | 5927(4) | 68(1) |
| C(13) | 8114(5) | 1929(5)  | 5894(4) | 69(1) |
| C(14) | 8298(4) | 2968(4)  | 5239(3) | 53(1) |

**Table S4. Anisotropic displacement parameters ( $\text{\AA}^2 \times 10^3$ ) for mo\_dd18319\_0m. The anisotropic displacement factor exponent takes the form:  $-2 \sin^2 \theta [h^2 a^{*2} U_{11} + \dots + 2 h k a^* b^* U_{12}]$**

|       | U11   | U22   | U33   | U23    | U13   | U12    |
|-------|-------|-------|-------|--------|-------|--------|
| I(1)  | 98(1) | 57(1) | 88(1) | -15(1) | 38(1) | -5(1)  |
| Cl(1) | 74(1) | 71(1) | 47(1) | -2(1)  | 17(1) | -18(1) |
| C(1)  | 56(2) | 54(2) | 59(2) | 8(2)   | 17(2) | -5(2)  |
| C(2)  | 40(2) | 53(2) | 46(2) | -2(2)  | 6(2)  | -8(2)  |
| C(3)  | 44(2) | 42(2) | 43(2) | -4(2)  | 6(2)  | -4(2)  |
| C(4)  | 42(2) | 47(2) | 63(2) | 8(2)   | 12(2) | 9(2)   |
| C(5)  | 43(2) | 50(2) | 57(2) | 6(2)   | 16(2) | 6(2)   |
| C(6)  | 42(2) | 40(2) | 42(2) | -5(2)  | 8(2)  | 1(2)   |
| C(7)  | 38(2) | 52(2) | 53(2) | -1(2)  | 3(2)  | 7(2)   |
| C(8)  | 36(2) | 54(2) | 55(2) | -1(2)  | 11(2) | -2(2)  |
| C(9)  | 48(2) | 38(2) | 41(2) | -6(2)  | 8(2)  | 5(2)   |
| C(10) | 49(2) | 50(2) | 59(2) | 5(2)   | 10(2) | 5(2)   |
| C(11) | 62(3) | 53(3) | 77(3) | 10(2)  | 20(2) | 2(2)   |
| C(12) | 78(3) | 57(3) | 72(3) | 20(2)  | 17(3) | 8(2)   |
| C(13) | 77(3) | 62(3) | 64(3) | 16(2)  | 2(2)  | 17(3)  |
| C(14) | 52(2) | 54(2) | 52(2) | 2(2)   | 6(2)  | 5(2)   |

**Table S5. Hydrogen coordinates ( x 10<sup>4</sup>) and isotropic displacement parameters (Å<sup>2</sup>x 10<sup>3</sup>)  
for mo\_dd18319\_0m.**

---

|       | x    | y    | z    | U(eq) |
|-------|------|------|------|-------|
| H(1)  | 7840 | 9793 | 1453 | 66    |
| H(4)  | 5761 | 7286 | 2768 | 61    |
| H(5)  | 5463 | 5528 | 3825 | 59    |
| H(7)  | 9267 | 4124 | 3683 | 58    |
| H(8)  | 9539 | 5861 | 2610 | 57    |
| H(10) | 5089 | 3298 | 4202 | 63    |
| H(11) | 4817 | 1566 | 5295 | 76    |
| H(12) | 6716 | 720  | 6377 | 82    |
| H(13) | 8883 | 1578 | 6320 | 83    |
| H(14) | 9184 | 3307 | 5230 | 63    |

---

**Table S6. Torsion angles [°] for mo\_dd18319\_0m.**

---

|                         |           |
|-------------------------|-----------|
| I(1)-C(1)-C(2)-C(3)     | 5.3(7)    |
| I(1)-C(1)-C(2)-Cl(1)    | -175.2(2) |
| C(1)-C(2)-C(3)-C(4)     | 58.2(6)   |
| Cl(1)-C(2)-C(3)-C(4)    | -121.4(4) |
| C(1)-C(2)-C(3)-C(8)     | -123.7(5) |
| Cl(1)-C(2)-C(3)-C(8)    | 56.7(4)   |
| C(8)-C(3)-C(4)-C(5)     | 0.6(6)    |
| C(2)-C(3)-C(4)-C(5)     | 178.7(4)  |
| C(3)-C(4)-C(5)-C(6)     | 0.7(7)    |
| C(4)-C(5)-C(6)-C(7)     | -1.4(6)   |
| C(4)-C(5)-C(6)-C(9)     | 179.0(4)  |
| C(5)-C(6)-C(7)-C(8)     | 0.9(6)    |
| C(9)-C(6)-C(7)-C(8)     | -179.6(4) |
| C(6)-C(7)-C(8)-C(3)     | 0.4(6)    |
| C(4)-C(3)-C(8)-C(7)     | -1.1(6)   |
| C(2)-C(3)-C(8)-C(7)     | -179.2(4) |
| C(7)-C(6)-C(9)-C(10)    | -149.3(4) |
| C(5)-C(6)-C(9)-C(10)    | 30.2(5)   |
| C(7)-C(6)-C(9)-C(14)    | 30.6(5)   |
| C(5)-C(6)-C(9)-C(14)    | -149.9(4) |
| C(14)-C(9)-C(10)-C(11)  | 0.5(6)    |
| C(6)-C(9)-C(10)-C(11)   | -179.6(4) |
| C(9)-C(10)-C(11)-C(12)  | 0.3(7)    |
| C(10)-C(11)-C(12)-C(13) | -1.0(8)   |
| C(11)-C(12)-C(13)-C(14) | 0.9(8)    |



C(12)-C(13)-C(14)-C(9) -0.1(7)

C(10)-C(9)-C(14)-C(13) -0.6(6)

C(6)-C(9)-C(14)-C(13) 179.5(4)

---

Symmetry transformations used to generate equivalent atoms:

**Table S7. Hydrogen bonds for mo\_dd18319\_0m [Å and °].**

---

| D-H...A | d(D-H) | d(H...A) | d(D...A) | <(DHA) |
|---------|--------|----------|----------|--------|
|---------|--------|----------|----------|--------|

---

## 8. Calculated geometries of intermediates

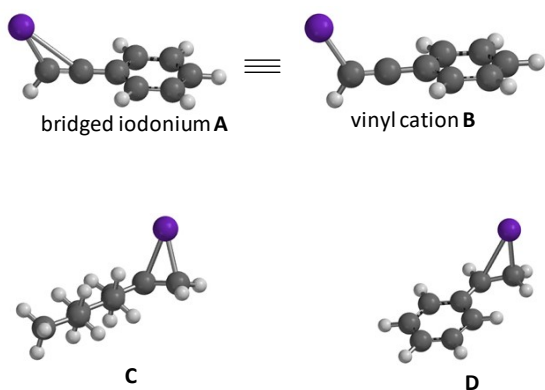

---

### Intermediate **A**

---

SPARTAN '14 Quantum Mechanics Driver: (Win/32b) Release 1.1.0

Job type: Geometry optimization.

Method: RDFTWB97X-D

Basis set: 6-311+G\*\*

Number of shells: 96

Number of basis functions: 274

Charge : +1

Multiplicity: 1

Parallel Job: 8 threads

SCF model:

A restricted hybrid HF-DFT SCF calculation will be performed using Pulay DIIS + Geometric Direct Minimization

Optimization:

| Step | Energy       | Max Grad. | Max Dist. |
|------|--------------|-----------|-----------|
| 1    | -7227.758801 | 0.013729  | 0.155116  |
| 2    | -7227.759158 | 0.005778  | 0.081724  |
| 3    | -7227.759361 | 0.001178  | 0.008483  |
| 4    | -7227.759373 | 0.000649  | 0.003919  |
| 5    | -7227.759376 | 0.000244  | 0.003100  |
| 6    | -7227.759376 | 0.000161  | 0.001631  |

Reason for exit: Successful completion

Quantum Calculation CPU Time : 14:31.38

Quantum Calculation Wall Time: 20:13.75

SPARTAN '14 Semi-Empirical Program: (Win/32b) Release 1.1.0  
Semi-empirical Property Calculation

M0001

Memory Used: 557.62 Kb

Reason for exit: Successful completion

Semi-Empirical Program CPU Time : .31

Semi-Empirical Program Wall Time: .02

SPARTAN '14 Properties Program: (Win/32b) Release 1.1.0

Use of molecular symmetry disabled

Cartesian Coordinates (Angstroms)

Atom X Y Z

-----  
1 H H1 -1.8719746 -2.1596143 0.3832351  
2 C C1 -2.4071402 -1.2363950 0.1962588  
3 C C4 -3.7260106 1.2158294 -0.2680792  
4 C C2 -1.7402455 0.0110907 0.4000880  
5 C C6 -3.7108784 -1.2368777 -0.2332296  
6 C C5 -4.3611631 -0.0175480 -0.4622777  
7 C C3 -2.4220687 1.2438693 0.1599514  
8 H H6 -4.2352819 -2.1697948 -0.3954389  
9 H H5 -5.3914010 -0.0287605 -0.8017611  
10 H H3 -1.8983917 2.1786946 0.3194759  
11 H H4 -4.2621695 2.1369674 -0.4565310  
12 C C7 -0.4506261 0.0240168 0.8216612  
13 C C8 0.7758982 0.0328539 1.1846715  
14 I I1 2.2624152 0.0130282 -0.3020809  
15 H H9 1.0952716 0.0496949 2.2224296

Point Group = C1 Order = 1 Nsymop = 1

---

Intermediate **B** has identical geometry as intermediate **A**

---

---

Intermediate **C**

---

SPARTAN '14 MECHANICS PROGRAM: (Win/32b) Release 1.1.0

Frequency Calculation

Warning: global charge (+0.00) does not match input file (+1)!  
Adjusted 5 (out of 66) low frequency modes

Reason for exit: Successful completion

Mechanics CPU Time : .64

Mechanics Wall Time: .37

SPARTAN '14 Quantum Mechanics Driver: (Win/32b) Release 1.1.0

Job type: Geometry optimization.

Method: RB3LYP

Basis set: 6-31G\* & LANL2DZ>Kr

Number of shells: 61

Number of basis functions: 147

Multiplicity: 1

Parallel Job: 4 threads

SCF model:

A restricted hybrid HF-DFT SCF calculation will be  
performed using Pulay DIIS + Geometric Direct Minimization

Optimization:

Step Energy Max Grad. Max Dist.

|    |             |          |          |
|----|-------------|----------|----------|
| 1  | -286.266825 | 0.037863 | 0.175851 |
| 2  | -286.271671 | 0.007064 | 0.141671 |
| 3  | -286.271315 | 0.005188 | 0.118204 |
| 4  | -286.271976 | 0.005218 | 0.244219 |
| 5  | -286.272018 | 0.004271 | 0.165318 |
| 6  | -286.271624 | 0.006251 | 0.058949 |
| 7  | -286.272417 | 0.000997 | 0.015420 |
| 8  | -286.272440 | 0.000752 | 0.023524 |
| 9  | -286.272449 | 0.000236 | 0.036684 |
| 10 | -286.272454 | 0.000653 | 0.005971 |
| 11 | -286.272458 | 0.000195 | 0.003232 |

12 -286.272459 0.000108 0.002999

Reason for exit: Successful completion  
Quantum Calculation CPU Time : 4:51.31  
Quantum Calculation Wall Time: 11:29.53

SPARTAN '14 Semi-Empirical Program: (Win/32b) Release 1.1.0  
Semi-empirical Property Calculation

M0001  
Memory Used: 719.24 Kb

Reason for exit: Successful completion  
Semi-Empirical Program CPU Time : .47  
Semi-Empirical Program Wall Time: .02

SPARTAN '14 Properties Program: (Win/32b) Release 1.1.0  
Use of molecular symmetry disabled

Cartesian Coordinates (Angstroms)  
Atom X Y Z

-----

|    |   |     |            |            |            |
|----|---|-----|------------|------------|------------|
| 1  | C | C7  | 0.7714962  | 1.5603948  | 0.1744514  |
| 2  | H | H8  | 1.3646764  | 2.2228771  | 0.8047220  |
| 3  | C | C8  | 1.3675105  | 1.1902717  | -1.0932171 |
| 4  | H | H2  | 0.7405063  | 0.7411031  | -1.8588569 |
| 5  | H | H9  | 2.2304180  | 1.7492402  | -1.4478873 |
| 6  | I | I1  | 2.1430833  | -0.4359937 | 0.2151378  |
| 7  | C | C1  | -0.6568557 | 1.3919660  | 0.5457428  |
| 8  | H | H3  | -1.0464951 | 2.4206763  | 0.3888865  |
| 9  | H | H7  | -0.7291649 | 1.2496575  | 1.6316511  |
| 10 | C | C2  | -1.5222939 | 0.3854405  | -0.2207840 |
| 11 | H | H1  | -1.0843853 | -0.6181323 | -0.1326327 |
| 12 | H | H4  | -1.5364847 | 0.6365075  | -1.2897573 |
| 13 | C | C3  | -2.9652771 | 0.3509430  | 0.3079300  |
| 14 | H | H5  | -2.9523706 | 0.0964347  | 1.3772913  |
| 15 | H | H10 | -3.4078331 | 1.3542134  | 0.2336756  |
| 16 | C | C4  | -3.8458008 | -0.6557162 | -0.4448534 |

17 H H6 -3.3831902 -1.6512895 -0.3905844  
18 H H11 -3.8728205 -0.3865884 -1.5098637  
19 C C5 -5.2728802 -0.7239448 0.1063305  
20 H H12 -5.2783273 -1.0282086 1.1596338  
21 H H13 -5.8728466 -1.4492760 -0.4520201  
22 H H14 -5.7756172 0.2477434 0.0363862

---

Intermediate **D**

---

SPARTAN '14 Quantum Mechanics Driver: (Win/32b) Release 1.1.0

Job type: Geometry optimization.

Method: RB3LYP

Basis set: 6-31G\* & LANL2DZ>Kr

Number of shells: 53

Number of basis functions: 150

Multiplicity: 1

Parallel Job: 4 threads

SCF model:

A restricted hybrid HF-DFT SCF calculation will be  
performed using Pulay DIIS + Geometric Direct Minimization

Optimization:

| Step | Energy      | Max Grad. | Max Dist. |
|------|-------------|-----------|-----------|
| 1    | -320.698706 | 0.035062  | 0.207173  |
| 2    | -320.713781 | 0.025046  | 0.212035  |
| 3    | -320.724588 | 0.020347  | 0.230662  |
| 4    | -320.732822 | 0.016244  | 0.224955  |
| 5    | -320.739334 | 0.013545  | 0.215704  |
| 6    | -320.744848 | 0.011728  | 0.204188  |
| 7    | -320.749800 | 0.010649  | 0.198502  |
| 8    | -320.754394 | 0.009755  | 0.192977  |
| 9    | -320.758774 | 0.009014  | 0.188802  |
| 10   | -320.763063 | 0.008115  | 0.189877  |
| 11   | -320.767001 | 0.006593  | 0.191244  |
| 12   | -320.770414 | 0.006646  | 0.181636  |
| 13   | -320.773179 | 0.006515  | 0.168861  |
| 14   | -320.775130 | 0.005086  | 0.174281  |

15 -320.776095 0.005308 0.202812  
16 -320.776928 0.006898 0.099844  
17 -320.777349 0.006860 0.075329  
18 -320.778046 0.002153 0.062140  
19 -320.778114 0.002566 0.028765  
20 -320.778228 0.000520 0.009730  
21 -320.778233 0.000399 0.014025  
22 -320.778237 0.000313 0.008093  
23 -320.778239 0.000164 0.003170  
24 -320.778240 0.000081 0.002034

Reason for exit: Successful completion  
Quantum Calculation CPU Time : 9:27.30  
Quantum Calculation Wall Time: 25:36.73

SPARTAN '14 Semi-Empirical Program: (Win/32b) Release 1.1.0  
Semi-empirical Property Calculation

M0001  
Memory Used: 622.27 Kb

Reason for exit: Successful completion  
Semi-Empirical Program CPU Time : .61  
Semi-Empirical Program Wall Time: .04

SPARTAN '14 Properties Program: (Win/32b) Release 1.1.0  
Use of molecular symmetry disabled

Cartesian Coordinates (Angstroms)

Atom X Y Z

-----  
1 H H1 -0.6551815 -1.0715584 -1.3137798  
2 C C1 -1.4755613 -0.6269607 -0.7604824  
3 C C4 -3.6104503 0.5181705 0.6970624  
4 C C2 -1.3012695 0.6244506 -0.0890517  
5 C C6 -2.6903004 -1.2771095 -0.6981492  
6 C C5 -3.7549121 -0.7067655 0.0267874  
7 C C3 -2.3976082 1.1777440 0.6464324

8 H H6 -2.8301411 -2.2262071 -1.2049148  
9 H H5 -4.7072598 -1.2280689 0.0681840  
10 H H3 -2.2635927 2.1251400 1.1611959  
11 H H4 -4.4433201 0.9387049 1.2504664  
12 C C7 -0.1100984 1.3601429 -0.1347166  
13 H H8 -0.0997193 2.3107509 0.3971284  
14 C C8 1.1355208 1.0152343 -0.8163804  
15 H H2 1.1077202 0.1852841 -1.5170706  
16 H H9 1.6742198 1.8747555 -1.2127405  
17 I I1 2.2888321 0.3721624 0.9475240

Point Group = C1 Order = 1 Nsymop = 1

Closed-Shell Molecular Orbital Coefficients

MO: 1 2 3 4 5

Eigenvalues: -10.44549 -10.41629 -10.39679 -10.38900 -10.38819  
(ev) -284.23632 -283.44177 -282.91121 -282.69928 -282.67711



## 9. References

- 1 Ueda, H.; Yamaguchi, M.; Kameya, H.; Sugimoto, K.; Tokuyama, H. Autotandem Catalysis: Synthesis of Pyrroles by Gold-Catalyzed Cascade Reaction. *Org. Lett.* 2015, **46**, 4948.
- 2 Xu, Z.-F.; Dai, H.; Shan, L.; Li, C.-Y. Metal-Free Synthesis of (E)-Monofluoroenamine from 1-Sulfonyl-1,2,3-triazole and Et<sub>2</sub>O·BF<sub>3</sub> via Stereospecific Fluorination of  $\alpha$ -Diazoimine. *Org. Lett.* 2018, **20**, 1054-1057.
- 3 Boeck, F.; Kribber, T.; Xiao, L.; Hintermann, L. Mixed Phosphane  $\eta^5$ -CpRuCl(PR<sub>3</sub>)<sub>2</sub> Complexes as Ambifunctional Catalysts for Anti-Markovnikov Hydration of Terminal Alkynes. *J. Am. Chem. Soc.* 2011, **133**, 8138-8141.
- 4 Chen, H.; Zhang, L. A Desulfonylative Approach in Oxidative Gold Catalysis: Regiospecific Access to Donor-Substituted Acyl Gold Carbenes. *Angew. Chem. Int. Ed.* 2015, **54**, 11775-11779.
- 5 (a) Verlinden, S.; Ballet, S.; Verniest, G. Synthesis of Heterocycle-Bridged Peptidic Macrocycles through 1,3-Diyne Transformations. *Eur. J. Org. Chem.* 2016, **2016**, 5807-5812; (b) Kayser, B.; Altman, J.; Beck, W. Alkyne bridged  $\alpha$ - amino acids by palladium mediated coupling of alkynes with N-t-Boc-4-iodo-phenylalanine methyl ester. *Tetrahedron* 1997, **53**, 2475-2484.
- 6 Yasuno, T.; Ohe, T.; Takahashi, K.; Nakamura, S.; Mashino, T. The human immunodeficiency virus-reverse transcriptase inhibition activity of novel pyridine/pyridinium-type fullerene derivatives. *Bioorg. Med. Chem. Lett.* 2015, **25**, 3226-3229.
- 7 Bortolini, O.; Bottai, M.; Chiappe, C.; Conte, V.; Pieraccini, D. Trihalide-based ionic liquids. Reagent-solvents for stereoselective iodination of alkenes and alkynes. *Green Chemistry* 2002, **4**, 621-627.
- 8 Al-Hassan, M. I. Halogenation of alkynes and alkynylsilanes. *J. Organomet. Chem.* 1989, **372**, 183-186.
- 9 Sproul, K. C.; Chalifoux, W. A. Highly Regio- and Diastereoselective Formation of Tetrasubstituted (Z)-1,2-Dihaloalkenes from the Halogenation of Trimethylsilyl Alkynes with ICl. *Org. Lett.* 2015, **17**, 3334-3337.
- 10 Barluenga, J.; Rodríguez, M. A.; Campos, P. J. Stereoselective Synthesis of 2-Functionalized 1-Bromo-1-iodo-1-alkenes by Electrophilic Iodination of 1-Bromo-1-alkynes. *Synthesis* 1992, **1992**, 270-272.
- 11 Barluenga, J.; Rodríguez, M. A.; Campos, P. J.; Asensio, G. Synthesis of 2-functionalized 1,1-diiodo-1-alkenes. Generation and reactions of 1-iodo-1-lithio-1-alkenes and 1,1-dilithio-1-alkenes. *J. Am. Chem. Soc.* 1988, **110**, 5567-5568.
- 12 Rao, D. S.; Reddy, T. R.; Kashyap, S. Chemoselective and stereospecific iodination of alkynes using sulfonium iodate(i) salt. *Org. Biomol. Chem.* 2018, **16**, 1508-1518.
- 13 Xiang, J.; Yuan, R.; Wang, R.; Yi, N.; Lu, L.; Zou, H.; He, W. Method for Transforming Alkynes into (E)-Dibromoalkenes. *J. Org. Chem.* 2014, **79**, 11378-11382.
- 14 Zeng, X.; Chen, L. Iodine-mediated regio- and stereoselective iodothiocyantation of alkynes in aqueous ethanol. *Org. Biomol. Chem.* 2018, **16**, 7557-7560.
- 15 Xia, X.-F.; Gu, Z.; Liu, W.; Wang, N.; Wang, H.; Xia, Y.; Gao, H.; Liu, X. Selective oxygenation of alkynes: a direct approach to diketones and vinyl acetate. *Org. Biomol. Chem.* 2014, **12**, 9909-9913.
